# Supplementary material for: Single-cell transcriptomics identifies CD44 as a marker and regulator of endothelial to haematopoietic transition
Source: Nat Commun. 2020 Jan 29;11:586. doi: 10.1038/s41467-019-14171-5 (PMC6989687; doi:10.1038/s41467-019-14171-5)
Supplement: Supplementary file 9 — Supplementary Data 5 [file 41467_2019_14171_MOESM9_ESM.xlsx]

## Sheet: normalizedFilteredExpressionMat
Genename	s1	s2	s3	s4	s5	s6	s7	s8	s9	s10	s11	s12	s13	s14	s15	s16	s17	s18	s19	s20	s21	s22
0610007P14Rik	8.85996	8.57637	8.35778	8.78708	8.8179	9.03052	8.71839	8.66118	8.27385	8.57876	7.9773	8.81231	8.57613	8.61275	8.85874	8.89596	8.94974	8.70261	8.61177	8.5687	8.86077	9.02472
0610009B22Rik	7.77587	7.7685	8.16939	8.28305	7.73046	8.50176	8.19728	7.92181	7.43942	7.78782	7.84408	7.00998	8.53946	8.47789	8.5011	8.15344	8.01478	8.25882	8.29968	8.38341	8.32653	7.61772
0610009L18Rik	3.81946	3.86849	3.30587	3.36554	3.18738	3.18557	3.27419	3.28671	3.54471	3.18713	3.5607	3.86551	3.18496	3.1829	3.35402	3.44606	3.36646	3.48888	3.22313	3.68134	3.43261	3.43648
0610009O20Rik	7.72777	7.67906	7.6938	7.11464	7.59354	7.57479	7.45234	8.10688	8.33154	7.98146	7.90366	7.00446	6.77935	7.4745	7.0998	7.95539	7.6867	7.19635	7.31679	7.34046	7.65054	7.57769
0610010F05Rik	8.32606	8.1382	8.2523	8.13366	8.34178	8.63734	8.27878	8.29016	7.8634	8.4276	7.68905	8.45397	8.94576	9.19305	9.03022	8.35143	8.61142	8.80723	8.75811	8.87967	8.9891	7.57053
0610010K14Rik	9.78396	9.47672	9.48086	9.80815	9.38684	9.77924	9.79349	9.7336	9.59705	9.80014	8.68202	9.35614	9.55165	9.3401	9.34461	9.19399	9.78252	9.2318	9.73206	8.98007	9.63434	9.27746
0610011F06Rik	7.07087	7.20815	7.16135	7.65164	7.41222	7.95539	7.51099	7.32724	7.23309	6.84459	8.22713	8.01892	7.99959	7.71584	7.76268	7.21062	7.4029	7.08958	7.88156	7.27827	7.3048	7.49546
0610012G03Rik	8.61088	8.83363	8.91218	9.06632	8.9799	9.06859	9.12099	9.10816	8.8666	8.41928	8.94225	9.06958	9.0571	8.55423	8.19796	8.31728	8.60827	8.57695	8.9933	8.55227	8.60145	9.02999
0610030E20Rik	5.33202	5.48495	4.89376	5.82427	6.08442	4.98828	5.59288	5.74674	5.79096	5.16378	6.64877	5.79293	5.94171	4.8563	5.74612	5.51238	5.88603	5.17038	5.34905	5.9043	5.92332	6.53782
0610037L13Rik	9.30204	9.55094	9.50645	9.34201	9.40204	9.26383	9.10001	9.35352	9.42209	9.1511	9.20446	9.05525	9.31504	9.20022	8.97502	9.0957	9.20414	9.01668	9.49694	8.48724	8.5671	8.84569
0610040J01Rik	4.29484	4.01097	3.69297	4.17573	4.10744	3.84518	3.99839	4.52349	4.99947	5.11848	3.69177	3.6914	3.69391	4.31445	3.69418	4.1448	4.16376	3.69011	4.4385	3.69698	4.27489	4.68649
1110001J03Rik	7.27786	7.22777	7.55923	7.35173	7.26192	7.49438	7.48393	7.47506	7.50128	7.33076	7.28107	6.87673	6.84218	7.31717	7.20913	6.98576	7.604	7.68584	7.70621	7.4051	7.72902	7.55337
1110002L01Rik	3.50603	3.49224	3.14735	3.52781	3.43639	3.31885	3.23673	3.43036	3.42547	3.22211	3.14703	3.26787	3.14761	3.30373	3.25741	3.33462	3.1638	3.61098	3.32575	3.33307	3.40592	3.43187
1110004E09Rik	7.44835	7.79424	7.55661	7.34503	7.61193	7.38352	7.26509	7.66031	7.35836	7.31289	6.91761	6.97597	6.7662	7.17163	6.87342	7.09483	7.69466	7.2546	7.29703	7.51367	7.4029	7.36562
1110004F10Rik	10.4629	10.3583	10.4906	10.598	10.6275	11.195	10.8137	10.7025	10.4916	10.4389	10.2191	10.2844	10.6234	10.9391	10.498	10.6544	10.8407	11.1466	11.0615	10.9045	10.4823	10.4009
1110006O24Rik	3.78263	3.79576	4.18218	3.64862	4.26081	3.64863	3.94431	4.1493	3.88321	3.65075	4.09512	4.02718	4.17087	4.14966	3.64795	3.97502	3.92044	3.91387	3.8703	4.01633	4.28616	4.37274
1110008F13Rik	6.71852	6.91306	7.00777	7.53875	7.18422	7.20265	7.418	6.63527	6.93621	6.85514	6.72257	6.85025	7.09772	6.99394	6.57943	7.10136	7.60639	7.33891	7.4921	7.61843	7.54331	7.7046
1110008L16Rik	6.71241	6.61747	6.62484	6.40861	6.50193	6.78061	6.46953	7.44587	7.21156	6.56492	6.83297	6.91509	6.17478	6.762	6.18679	6.73677	7.64504	7.37487	6.93629	7.57528	7.18683	7.21088
1110008P14Rik	4.70234	5.05831	5.15985	4.85855	4.80636	4.94768	5.11296	4.82963	5.03805	4.99744	5.10142	5.22588	4.73886	4.94648	4.86416	4.9212	5.27257	5.08752	4.89634	5.31022	5.39132	5.37849
1110012L19Rik	7.10602	7.01978	6.81929	7.38861	6.67573	6.76735	6.73986	7.22316	7.6844	6.32445	7.44931	6.76816	7.47425	7.17178	7.13703	7.38403	7.16398	7.01637	7.35211	6.92458	6.55376	7.00625
1110019D14Rik	5.10653	4.91425	4.95856	4.9615	4.61841	4.96161	4.61712	4.27822	4.75175	4.42994	5.16421	4.64144	4.97443	5.26423	5.64443	5.11678	4.70503	4.51316	4.92837	5.81258	5.73224	4.82667
1110032A03Rik	6.50675	6.27056	5.88695	6.138	6.2267	6.6801	5.20301	6.58312	6.01469	6.01033	6.77628	6.90329	6.6687	6.54722	6.33713	6.20415	6.48414	6.46693	6.29971	6.81535	6.57508	6.19152
1110032F04Rik	4.80831	4.76022	4.84441	4.42122	3.81492	4.69611	5.11479	3.7923	5.26251	4.98317	4.38059	3.6992	4.61936	3.66526	3.6728	3.6687	3.66975	3.66702	3.66921	3.67675	3.68484	3.68545
1110034G24Rik	5.76388	6.1235	5.41128	5.33984	5.68352	4.72828	5.67452	5.41433	4.57663	5.62792	5.18615	5.27373	6.23735	5.29869	5.71557	4.94596	5.24682	5.36194	5.56597	5.60668	5.27669	5.81801
1110037F02Rik	8.28624	7.08004	8.78303	8.33487	8.19072	7.568	8.37263	7.96915	8.49507	9.02272	8.72522	8.92789	8.26314	8.11126	8.5775	8.30965	7.85578	7.87158	8.41868	7.99743	8.05368	8.35559
1110038B12Rik	8.91417	9.06882	9.08329	8.89865	8.60786	9.1083	8.80284	9.09705	9.47113	9.31709	8.66717	8.58711	9.12983	8.79093	9.47397	9.38688	9.56501	9.8351	8.96609	9.88774	9.20436	9.47988
1110038F14Rik	8.59139	8.37582	8.27675	8.31122	8.48682	8.30487	8.19108	8.4597	8.76545	8.38986	8.81983	8.12475	8.06226	7.99711	8.18664	8.25363	7.98708	7.94365	8.23019	8.07942	7.97296	8.27997
1110051M20Rik	7.18181	7.28429	6.47542	7.24625	7.10381	7.22977	6.80601	7.23315	6.80473	6.93405	7.50082	7.84731	6.91355	7.21643	6.96253	6.9066	7.05915	7.11777	7.50251	6.42855	6.9957	7.26919
1110059E24Rik	10.0186	9.6144	9.66317	9.86224	9.8002	10.2966	10.2256	9.80491	10.1023	9.83117	9.68934	9.56399	9.55483	10.4865	9.727	10.2835	9.69848	10.4031	9.93417	10.1239	9.71582	9.16422
1110059G10Rik	8.55653	7.55179	8.17687	7.3262	8.20532	7.51063	7.61418	7.56736	8.22323	8.71824	7.69844	8.33995	8.45119	8.4695	9.22049	9.15249	8.40319	8.80789	7.93503	9.46042	9.46824	8.12712
1110065P20Rik	3.49973	3.66641	3.49812	3.68374	3.48956	3.51202	3.6838	3.68198	3.63632	3.48732	3.74344	3.87561	3.87504	3.66493	3.60593	3.63932	3.72514	3.73087	3.7296	3.5804	3.47264	3.74288
1190002F15Rik	5.95922	5.48726	5.75566	5.63306	6.00049	5.29381	5.74079	6.35443	6.1819	5.68967	5.48313	5.17859	5.45773	6.37804	5.73843	5.74268	6.20463	5.44493	6.09138	5.99023	6.24421	6.3451
1190002N15Rik	5.74869	6.40808	6.54669	5.72117	6.61952	5.46856	4.76075	5.2264	6.5291	6.58724	4.55865	6.34565	5.60584	6.40591	5.33305	4.5139	4.51759	6.40056	5.99264	6.01946	6.98458	6.61808
1190007I07Rik	5.88195	5.68464	5.85872	6.1873	5.57917	5.24075	5.77123	5.40563	5.80472	5.78339	5.7181	5.70133	5.44676	5.91426	5.97381	6.20109	6.70769	6.4627	6.06097	6.99874	6.55732	7.08272
1300002E11Rik	6.28548	6.97773	6.21375	6.27189	5.63347	6.42743	6.54866	6.73175	6.36421	6.45991	6.49046	6.51711	6.56105	6.65691	7.37664	7.3775	5.31642	6.53301	6.32939	7.73591	6.87223	6.49082
1500009L16Rik	5.00418	4.88882	5.88618	4.84246	5.13026	6.10062	5.34018	5.33582	5.70846	4.72098	4.40807	4.73889	5.8995	5.84861	5.57518	4.71697	5.13525	5.11274	5.93801	5.3512	5.50078	4.43221
1500011B03Rik	7.17093	7.24489	7.33932	6.97346	7.06954	7.38194	7.25905	6.98006	7.04606	7.66607	7.4354	7.55377	7.11642	6.91981	7.04358	7.7974	7.00029	7.41225	7.20422	7.30756	6.74138	7.18426
1500011K16Rik	6.70564	6.79911	6.98032	7.52653	6.99629	7.0938	7.34234	7.14844	6.63355	6.65982	7.23568	7.84636	7.51887	7.35911	7.45765	7.40277	7.49134	7.40563	7.49864	7.46446	7.17619	7.07901
1500015A07Rik	3.52212	3.53733	3.47924	3.86121	4.04445	3.48066	4.18408	4.08134	4.08993	3.48287	3.76583	4.00035	4.44644	3.5273	3.50495	3.77192	3.77028	4.07993	3.87517	3.85229	3.55818	3.48521
1600002H07Rik	6.95096	6.77291	6.82824	6.55257	6.6027	5.97021	6.43307	5.75218	6.83582	6.28899	6.2825	6.99849	4.96683	7.15021	6.6579	6.52071	6.63249	7.01855	6.93409	6.4614	6.3092	6.42216
1600002K03Rik	4.06932	4.49783	4.18944	4.68979	4.19044	4.52314	4.51512	4.24204	4.52089	4.56337	4.16058	4.42377	4.66286	4.71557	4.60799	4.43465	4.9406	4.70581	4.35872	4.85173	4.93262	4.82566
1600012H06Rik	7.87386	8.19767	8.75173	6.97853	8.09732	8.046	7.03658	7.42453	8.002	7.56822	8.90435	8.69523	9.32096	8.63281	8.94023	9.16358	8.02212	7.80464	8.24332	8.53974	8.54679	7.83656
1600014C10Rik	5.26249	6.37396	4.38665	5.69757	5.60786	4.4021	5.10087	5.41087	6.1102	6.15992	5.65772	5.69943	6.20042	6.16976	4.3944	5.68196	6.354	6.39974	6.34346	7.2302	7.12223	7.89205
1600020E01Rik	5.73108	6.25027	5.57186	5.65186	6.29911	5.88844	6.14611	6.03896	5.98284	5.85804	6.45382	5.9388	6.64179	5.49103	6.3017	6.62696	6.211	5.82448	5.33245	6.02476	5.56428	6.39154
1700007L15Rik	3.53911	3.34275	3.50061	3.46752	3.19918	3.19792	3.4792	3.49771	3.66459	3.59858	3.19689	3.19678	3.19749	3.28449	3.60718	3.2437	3.33829	3.79739	3.5016	3.22082	3.45727	3.20015
1700010I14Rik	4.24812	4.17076	4.76743	4.37315	4.28296	3.9677	4.00385	4.16952	3.95425	4.50306	4.30625	3.88037	3.88263	4.18503	4.05467	5.07041	4.71527	4.17101	4.61004	4.84545	4.53815	4.5464
1700017B05Rik	6.24944	6.33044	6.09348	6.28793	6.69363	6.46589	6.18291	6.71881	7.68685	6.4644	5.10451	6.18756	5.94051	5.82163	5.13659	5.36389	6.05632	6.39426	5.70837	5.68529	6.08367	6.36826
1700020I14Rik	8.86055	8.99756	8.46027	9.08411	9.38203	9.69913	9.49521	9.05003	8.57904	8.91554	8.73096	8.92548	8.54289	9.4467	8.2552	8.73672	8.31091	8.42701	9.04448	8.63159	8.79725	8.35028
1700021F05Rik	7.13776	6.95465	6.68182	7.7851	7.29305	7.93762	7.45912	7.53146	7.33486	7.27342	6.81423	7.4533	6.74133	7.5894	7.51158	6.88093	7.29075	7.1051	7.46296	7.6933	7.11438	7.79819
1700025G04Rik	5.52626	5.84242	5.42279	5.70785	5.67157	5.48233	5.98431	5.50879	5.24428	5.25308	4.75526	4.91925	4.79488	4.83508	5.54613	4.55544	4.96734	4.49983	4.91019	5.49147	5.71341	5.23464
1700029J07Rik	3.33965	3.80372	3.33283	3.33455	4.24212	4.57355	3.33147	3.51391	3.8468	4.03482	3.33199	3.50694	4.40556	3.32993	3.33369	3.33164	3.5731	3.4544	3.60353	3.81147	4.0582	3.42549
1700030C10Rik	4.33983	4.09436	4.16534	4.11377	4.46716	3.79734	4.04468	4.1831	4.47394	3.83053	3.89195	3.97389	4.3435	3.95628	4.54544	4.52955	3.9121	4.47027	4.37998	4.11899	4.02396	4.02763
1700030K09Rik	5.1862	5.67856	5.32721	4.96735	5.59961	5.88385	5.23447	5.65609	5.5481	5.22445	5.22242	5.74467	5.31959	5.4243	5.99192	6.01919	5.4231	5.11952	5.07225	5.47032	5.05333	5.72472
1700037H04Rik	6.62649	7.02992	6.88262	6.8179	7.09383	6.87216	6.81111	7.3289	7.0302	7.3704	6.6266	6.66311	7.01545	6.75308	6.63268	6.54434	7.21956	7.12738	6.87839	7.46654	7.1623	7.81147
1700048O20Rik	4.30403	4.926	4.77256	4.96951	4.55931	4.78063	4.85974	4.28282	4.88297	4.78642	4.1086	4.6673	5.1065	4.95522	4.1112	5.22538	4.53018	4.62781	4.70927	4.70473	4.12044	4.12091
1700052K11Rik	3.75692	3.80661	3.59116	3.47113	3.74952	4.01515	3.79649	3.44523	3.44655	3.76435	4.11368	3.44241	3.92666	4.23438	3.46869	4.36068	3.63539	3.4417	3.98898	3.83118	3.52123	3.55706
1700066B19Rik	3.44911	3.44555	3.44342	3.49846	3.73352	4.17542	3.44229	4.06673	3.44689	3.678	4.03672	3.86486	3.44397	3.7441	3.75872	3.44243	4.05506	4.19477	3.79055	3.58363	4.40178	3.87111
1700066M21Rik	6.39967	6.24961	6.64949	6.30709	6.45788	6.85627	6.25798	6.31097	7.04832	6.24959	6.52251	6.44965	5.5049	6.00568	6.50976	6.83675	7.02088	6.5017	6.38074	6.53891	6.89268	5.90562
1700086O06Rik	5.37585	4.87755	5.23649	5.0702	5.14894	4.80051	4.99492	4.89372	5.01231	5.31579	5.13565	5.07138	4.80812	4.62094	5.01108	5.65567	5.10308	4.87402	4.87757	5.52315	5.26239	5.30314
1700094D03Rik	5.17015	5.35311	5.05062	5.49198	5.14098	5.80192	5.28833	5.62421	5.68929	5.22616	5.66011	5.89643	5.94374	5.2986	4.93542	5.15907	5.18171	5.38637	5.43057	5.50679	5.31962	5.47231
1700096K18Rik	3.8126	3.74686	3.46901	3.82234	3.52511	3.40861	3.72493	3.4091	3.93237	3.41034	3.42641	3.75688	3.9344	3.48046	3.40806	3.94975	3.77004	3.74105	3.56537	4.09055	3.87582	3.62843
1700123O20Rik	8.37604	8.79233	8.59281	8.77458	8.86233	8.71796	8.56302	8.54258	8.32157	8.6887	8.63649	8.6213	8.92386	8.96836	9.02601	9.01246	8.96073	8.82374	8.84499	9.20049	8.65249	8.88244
1810006J02Rik	5.33617	5.10743	5.59343	3.83571	4.09418	3.96661	4.1976	4.1962	3.84362	4.27479	4.21444	6.31725	4.69846	4.62032	5.6078	3.82617	4.17094	4.99526	4.43784	3.93588	3.85241	4.77207
1810009A15Rik	4.02798	3.90926	3.79908	3.98003	3.89818	4.03297	4.04591	3.96982	3.90522	3.92784	3.82556	3.73812	3.76219	3.81551	3.67746	3.79218	3.84269	3.76414	3.83687	3.80993	3.79557	4.07175
1810011O10Rik	10.3616	9.93147	11.0745	8.95923	9.18461	9.31261	9.43292	9.5495	9.10387	9.63649	9.53726	9.1299	9.43514	8.10934	7.91523	8.84922	3.85874	3.75987	6.8991	6.7704	7.3442	5.66284
1810013L24Rik	6.87543	7.77571	7.53206	7.87262	7.45288	8.08719	7.02574	6.23435	7.15904	6.41938	7.86849	8.15447	8.33617	7.7658	8.21954	8.24045	6.33364	7.34057	7.10392	7.43245	7.94163	7.56328
1810014B01Rik	4.50885	5.78576	4.78269	5.37732	4.83369	4.40452	5.67713	4.66756	4.62167	5.62954	5.4794	4.85887	5.19256	6.03988	5.42045	4.54944	6.29838	6.41347	5.82344	6.69511	6.75372	6.30682
1810022K09Rik	9.08267	8.90637	9.48027	9.72357	9.42358	9.87614	9.76045	9.22218	9.43862	9.82252	9.29165	9.90476	9.55462	9.70222	10.5394	9.79178	10.1178	10.453	9.95763	10.5087	10.0382	9.90855
1810024B03Rik	3.38626	3.23971	3.35345	3.39586	3.27505	3.36282	3.26368	3.39094	3.31462	3.33833	3.19044	3.36282	3.19347	3.34164	3.33462	3.37437	3.51735	3.50877	3.46516	3.44727	3.55315	3.53975
1810026B05Rik	7.25528	7.16206	7.19545	7.11508	7.11596	7.56334	6.81434	6.79548	7.93649	8.11916	8.06187	8.46101	8.57478	8.56265	8.50253	8.43739	6.9127	7.91321	7.42392	8.10809	7.94712	7.2271
1810026J23Rik	6.7721	7.5318	7.40917	7.21185	7.75789	8.20221	7.45455	7.04776	7.34553	5.85428	7.58847	6.87513	7.10252	6.98192	7.52075	5.89579	7.19638	7.74468	7.91417	7.66464	7.85342	7.70038
1810030O07Rik	8.08771	7.74858	8.09907	8.39356	7.59064	7.05082	8.00281	8.54242	8.27422	8.21133	8.5644	8.39857	7.92816	8.62927	7.0368	8.1891	7.65374	8.14876	8.07442	9.2682	8.17883	7.76538
1810032O08Rik	6.10394	6.65274	6.33262	5.9453	5.86019	6.47438	5.87839	5.64912	6.83427	6.01447	5.92146	5.31532	6.15993	5.73536	6.19718	6.01288	6.49635	6.4246	6.14748	5.90236	6.25068	5.82877
1810037I17Rik	8.84974	8.56566	8.83839	8.87212	9.09852	9.39564	8.92668	8.71821	8.87846	8.67584	9.23456	9.33837	9.14774	9.07233	8.98077	8.83513	8.98244	8.94058	9.10479	9.34162	8.96301	9.22059
1810043G02Rik	6.20805	6.50569	6.36951	5.68458	5.8738	6.05835	5.97477	5.8348	6.03377	6.39724	6.44642	6.07735	6.16846	6.05377	6.13006	6.45028	5.95114	6.06961	5.98598	5.84957	6.17561	5.92915
1810043H04Rik	7.27851	7.23815	7.1629	7.59931	7.65209	7.70874	7.28879	7.11501	7.01055	7.27866	6.77603	7.1707	7.1831	7.29357	7.27913	6.55742	7.61972	7.47042	7.60374	7.48944	7.4346	7.94751
1810044D09Rik	3.63333	3.88415	3.87465	3.57429	3.53449	3.68767	3.41563	3.41813	3.7326	3.55692	3.57617	3.41579	3.90849	3.59651	3.41707	3.80052	3.72745	3.9517	3.52535	4.13419	4.06179	3.71563
1810055G02Rik	6.54007	6.06631	6.35743	6.97999	6.1669	5.53709	6.53649	5.22731	6.65202	5.95726	5.45329	4.63133	6.00167	6.28187	5.52747	4.93164	5.92269	5.80653	6.13741	5.75915	4.94161	6.18763
1810058I24Rik	8.77815	9.05877	9.27508	8.96682	9.3433	8.82804	9.08733	8.85883	8.58959	9.03971	9.03802	8.88584	9.0454	9.30199	9.16202	8.60154	8.70366	9.02736	9.10752	8.81035	9.32218	8.94213
2010107E04Rik	10.9875	10.7399	10.9888	10.9721	10.9119	10.8958	10.8036	10.8724	10.8877	10.8851	10.7153	11.1112	10.9601	10.9897	11.1321	11.1678	10.6608	11.1651	10.8502	11.3532	11.3104	11.2066
2010111I01Rik	8.64321	8.7356	8.68344	8.6601	8.05327	8.98529	8.19533	8.17849	8.78945	8.22303	7.27718	8.3639	8.07107	8.09613	7.72148	7.78947	7.43331	6.96236	7.62101	7.2742	7.0949	7.21198
2010204K13Rik	5.55817	5.93597	5.67109	6.26967	5.98633	5.88095	6.04592	5.95007	6.08249	5.92507	4.58286	4.58187	4.58841	5.39369	5.46438	5.20368	5.33733	5.54373	5.74338	5.82685	5.40808	5.55481
2010315B03Rik	6.33728	6.1673	6.31689	5.73479	6.40293	5.82309	4.75873	5.17657	4.83755	6.30393	6.89033	7.50557	4.57809	6.92792	7.41248	7.05227	6.28064	6.42032	6.33265	7.32135	8.3336	5.97687
2010320M18Rik	4.01907	4.05334	3.74972	3.65233	3.77156	4.26675	3.99552	3.91257	3.74067	3.76667	3.81221	3.77823	3.82663	3.74487	3.68742	3.70127	3.81592	3.97236	3.91641	4.08942	4.09686	3.94328
2200002D01Rik	5.0863	5.47831	5.13051	5.84028	5.70214	5.57944	5.82034	5.04034	6.09825	5.51673	5.61279	6.19204	5.36592	5.80222	5.29694	5.5989	5.22677	5.22851	5.53022	4.58376	4.7351	4.73864
2210013O21Rik	9.0276	8.59283	9.13804	8.23844	8.49891	8.57303	8.55308	8.47844	8.29883	8.57803	9.11187	9.16089	8.54044	8.73437	8.59723	8.88753	8.76177	8.70748	8.55724	8.43533	8.15369	8.38596
2210016F16Rik	6.94094	7.67609	7.36038	6.81775	7.11411	6.38866	7.31512	6.9168	6.14959	6.75904	6.42493	7.64067	6.94052	6.95608	7.6336	6.541	7.63607	7.37291	7.58841	8.05983	7.92164	8.55207
2210016L21Rik	8.11471	8.40275	8.08436	8.22674	8.13127	8.64692	8.54304	8.34735	7.72167	8.14533	8.40861	7.77687	7.67722	7.81793	8.11274	7.63949	8.30194	7.99929	8.28779	7.54114	7.60595	7.92131
2210404O09Rik	5.21103	4.30124	4.63454	5.20926	4.88004	4.56203	5.30397	5.58307	5.33371	5.75747	5.03863	5.76452	5.18789	4.43762	4.29443	6.48683	5.7004	4.88833	5.40241	6.56263	5.761	4.53674
2210408I21Rik	5.40955	5.36569	5.34072	6.03533	5.69239	6.32411	5.32743	6.32095	5.23264	6.40653	5.2719	6.82314	6.44022	6.06136	6.38392	6.14239	5.39019	5.78601	5.82587	5.93134	6.12148	5.69032
2300009A05Rik	5.22493	5.60596	5.96263	5.25031	5.64628	5.35332	5.71218	4.71533	5.40872	5.69916	5.94081	5.78455	5.63356	5.04368	5.7946	6.39828	5.82195	6.23396	5.87882	5.9197	5.66153	5.63873
2310001H17Rik	3.37418	3.36898	3.36586	3.36796	3.37178	3.36797	3.54971	3.3689	3.91463	3.58799	3.60085	3.8051	3.97722	3.36232	4.2545	4.01827	3.36505	4.0331	3.36472	4.19221	4.73933	4.75214
2310009A05Rik	7.01612	7.29054	7.45919	6.95747	7.10304	7.56205	7.29061	6.90631	7.35166	7.54097	7.51912	7.55589	7.9994	8.10692	8.45206	8.14422	7.68589	8.07491	7.67738	8.91227	8.58761	7.46919
2310009B15Rik	5.80229	6.5662	6.3195	6.01359	6.15429	6.1366	6.12938	6.36024	5.98722	6.67394	6.56801	6.46065	6.70698	6.17005	6.67863	7.36991	6.28872	6.9587	6.57829	6.59134	6.44508	5.90609
2310010J17Rik	3.94309	3.67596	3.47254	3.77084	3.4905	3.7709	3.55585	3.52363	3.60108	3.55938	3.95794	3.91384	3.43727	3.60652	3.61609	3.62693	3.51835	3.61155	3.80187	3.94362	3.94541	3.5551
2310011J03Rik	6.77735	7.05186	6.39452	6.74387	6.97654	6.08468	6.09954	7.26026	5.84824	6.92872	6.72428	7.10662	5.65073	6.69098	6.44488	6.90497	7.16773	6.92292	6.54733	7.01004	6.76212	7.27648
2310022A10Rik	5.0385	5.46836	5.34029	5.33535	5.49893	4.57106	5.39653	5.32708	5.65053	5.75413	5.58399	5.75873	5.32613	5.02322	5.24811	5.12318	5.2864	5.76889	5.18292	5.2232	5.56132	5.27181
2310022B05Rik	5.73194	5.82376	6.1522	5.34434	5.6542	6.32599	6.18242	6.25305	5.86087	6.29384	5.18882	5.37619	5.37357	5.13352	5.45089	5.56367	5.52439	5.04606	5.28432	5.28408	5.06704	5.0737
2310033P09Rik	7.31968	7.03509	7.40622	7.70779	7.60824	7.5164	7.63976	7.38076	7.90842	7.45225	7.49531	6.54609	7.00898	7.18069	7.00291	7.38235	7.40324	7.14404	7.37331	6.88062	7.42675	7.31791
2310035C23Rik	6.1838	6.46929	7.37818	7.09432	6.69254	6.92129	6.85107	5.97646	7.0021	7.72288	7.59229	8.08007	7.39536	7.14761	7.28994	7.85741	6.74905	6.83599	7.37143	7.4578	7.00857	7.87166
2310036O22Rik	7.66895	7.93159	7.68506	8.34705	8.23978	8.47819	8.91806	7.07705	7.95668	8.12253	7.81844	8.07333	7.70909	8.15283	8.14256	8.19056	8.35134	7.91227	7.97128	7.6886	8.21196	8.73581
2310039H08Rik	6.62306	6.24293	6.7004	7.25779	6.93083	6.96631	6.76781	6.2949	6.78394	6.90599	6.71709	6.88735	6.77222	6.87367	6.85706	6.86414	7.40232	7.08924	7.10731	7.72542	7.15175	7.0682
2310040G24Rik	3.63014	3.65339	3.76221	3.54281	3.9429	3.51501	3.51221	3.7692	3.51724	3.51746	3.98859	3.70588	3.51405	3.88863	3.96335	3.96377	4.41333	3.76465	3.8941	4.37837	4.4577	4.2951
2310057M21Rik	7.52903	6.88647	7.62194	7.66412	6.62369	7.98207	7.60798	7.76243	6.08632	7.29112	7.37858	7.82589	7.0862	7.42299	7.79781	7.49646	7.54432	7.69008	7.14555	7.64655	6.90772	6.98407
2310061I04Rik	7.37706	7.03404	7.11612	7.04156	6.75281	7.44354	6.9442	7.17177	7.70371	7.12232	7.33042	6.67079	7.26388	6.76891	7.62689	7.1522	7.80419	7.5122	7.68416	6.9145	7.19031	6.98137
2410002F23Rik	8.39788	8.38317	8.39813	7.74516	8.50149	7.99781	8.15712	8.02399	7.80224	8.71535	8.49481	7.82025	8.10863	7.80786	8.24359	8.01511	8.72306	8.36634	7.96892	7.42065	7.09913	7.54742
2410004B18Rik	7.82641	7.58161	7.5519	8.22079	8.09334	8.09348	8.00128	7.62352	7.68036	7.82564	7.78525	8.05122	7.53996	8.518	8.39057	7.87173	7.98796	8.09641	8.17355	7.92903	7.46378	7.67812
2410006H16Rik	8.78064	8.64697	8.96176	8.19427	8.25941	8.6156	8.12911	8.72724	7.9527	8.64305	8.26369	8.41112	8.89714	7.57313	8.33698	8.47374	9.07385	8.76408	8.53105	9.13455	8.82513	9.20933
2410015M20Rik	8.9064	8.7122	9.13983	9.2689	9.37821	9.64538	9.28986	9.1702	8.71441	8.91307	9.1865	9.41849	9.3365	8.95571	8.97996	8.85571	9.4223	9.09953	9.54597	9.26973	9.5487	9.68857
2410016O06Rik	5.33705	5.57757	5.33301	5.82049	5.79957	5.82065	5.76948	5.68362	5.54376	5.30429	5.23376	5.38162	5.62284	5.42541	5.67021	5.08479	5.76713	5.22784	5.69895	5.47826	5.1372	5.38852
2410018L13Rik	3.95671	4.0575	4.00675	3.90122	3.9656	4.64331	3.92434	4.27115	3.92823	4.36236	4.85597	4.52588	3.84032	4.00452	4.47031	5.17587	4.06357	4.10102	4.29867	3.82693	3.92343	3.99463
2410089E03Rik	6.18555	5.87958	6.23079	5.37589	5.73005	5.33692	6.02063	6.42703	6.54456	5.9308	6.88907	5.83495	6.16087	5.29953	5.90932	6.46831	5.05383	5.42431	5.63183	5.91764	5.93931	5.9814
2410131K14Rik	5.31603	5.70307	5.68291	5.66781	4.82642	4.46547	5.09011	6.09424	4.47237	5.95407	4.98822	5.67454	5.1401	5.28239	5.52759	5.85572	5.19887	5.425	5.12334	4.78484	5.24167	4.93452
2500002B13Rik	4.99741	5.05729	5.43018	5.02636	5.20719	4.91493	4.98941	4.60554	4.74942	5.13703	4.90113	4.91356	4.44104	4.99445	5.23515	5.1581	4.93237	4.45691	5.20602	5.28422	4.85406	5.23051
2500004C02Rik	5.96718	6.47146	5.97418	6.07718	5.57036	6.80071	6.24057	6.09612	6.50346	6.44093	6.87663	5.70973	6.79453	6.57855	7.07139	5.75685	6.7584	7.12695	6.55938	5.54382	5.76422	5.62377
2510002D24Rik	7.2763	7.39868	7.01407	7.38113	7.51866	6.38479	7.11085	6.87936	7.80529	7.10192	7.60334	7.71549	7.41468	7.41927	7.60157	6.64396	7.66615	7.35208	7.80283	7.08307	7.78312	7.61161
2510009E07Rik	4.84942	4.7203	5.50326	6.01188	6.32357	6.19603	5.10341	6.12482	4.49339	6.25453	5.75364	7.23259	5.59699	6.57689	6.73074	6.10085	4.46327	4.4913	5.8326	6.19076	5.9394	5.66109
2510039O18Rik	5.79307	5.64791	5.7039	6.08697	5.35559	5.81534	6.28938	5.94643	5.94153	6.16869	6.38357	5.77961	6.42001	5.6548	6.25918	6.47522	5.92715	5.97503	6.05328	6.24518	5.60133	6.02846
2610001J05Rik	8.85429	9.07804	9.12094	9.51976	9.40663	9.47231	9.34726	9.41795	9.70664	9.22109	9.70243	9.39817	9.65392	9.4943	9.70224	9.13956	9.08436	9.63551	9.31022	9.24999	9.7003	9.67873
2610002M06Rik	7.81188	7.52455	8.03752	7.75316	6.88279	7.7772	7.52063	6.90527	7.23302	8.03743	7.30336	7.70465	7.25722	8.3032	9.0589	8.2002	8.12839	8.23988	7.88238	9.18732	8.40203	7.32728
2610005L07Rik	5.32856	5.39127	5.56277	5.45549	5.53161	5.57425	5.54335	5.48849	5.56911	5.54131	5.72858	5.3932	5.67564	5.24912	5.04723	5.21063	5.32456	5.20538	5.53629	5.17537	5.21037	5.63108
2610008E11Rik	7.37116	7.45713	6.6477	7.34024	6.71764	6.74849	7.93463	7.09991	8.20506	8.02067	9.22174	8.8176	9.33112	8.99021	8.3729	9.3156	7.72983	8.202	7.05036	5.35862	8.13607	6.47781
2610020C07Rik	3.4127	3.24427	3.30364	3.12524	3.18946	3.19343	3.09951	3.2436	3.18554	3.49258	3.09977	3.25417	3.10054	3.71409	3.39988	3.0996	3.56511	3.16534	3.34613	3.50841	3.45985	3.73096
2610020H08Rik	7.12211	6.08833	7.38102	6.43323	7.02744	6.62385	6.53888	7.18145	8.14018	7.29177	7.3728	7.98965	7.30682	7.24139	8.22537	8.04381	7.35121	6.41489	6.95481	7.78303	7.56702	6.77931
2610044O15Rik8	6.48866	5.93663	6.8028	6.10685	5.9134	6.17373	5.87909	6.19302	6.10474	6.63834	6.34973	7.26449	6.14426	7.81289	7.16975	7.41154	7.47777	7.19904	6.71781	7.35648	6.49399	5.54585
2610203C22Rik	6.71478	6.11493	7.07798	6.67773	6.37559	7.52967	6.81947	6.95494	5.6979	6.90574	5.22863	4.54334	4.55879	5.72102	5.60446	5.99522	5.57837	5.18722	6.08644	5.90027	6.16183	6.33796
2610301B20Rik	7.44463	7.39951	7.01488	7.35919	7.64364	7.69851	7.39374	7.4235	4.95437	6.86101	7.71967	7.555	7.78115	6.798	7.71381	7.62156	7.87495	7.68041	7.64052	7.65194	6.57771	7.75706
2610305D13Rik	8.21777	8.08294	8.93924	8.86871	8.35339	9.58885	8.66058	9.05234	7.25506	9.28532	8.9839	9.74027	8.8804	10.5356	7.64182	9.88881	8.09637	9.8644	9.85322	10.8329	10.6819	9.5493
2610306M01Rik	4.78402	5.48089	5.43458	4.5724	4.94429	5.62812	4.94742	4.95902	5.4056	4.76937	4.96823	4.79868	5.81926	5.21135	5.27434	5.3662	5.63189	4.82784	5.29392	5.45239	5.08371	5.1129
2610307P16Rik	5.44568	5.10243	5.75178	5.1357	4.96433	5.33786	4.41788	4.80691	5.08759	5.19299	6.1884	5.55375	5.74123	4.95129	4.58483	4.71428	4.66371	4.48842	4.4726	4.24753	4.81384	4.2597
2610318N02Rik	7.17318	6.57152	6.52479	7.40751	7.3187	7.35026	7.29793	7.42158	7.13853	7.13388	5.59774	5.51949	5.3778	6.87296	6.18764	6.61363	7.02391	6.48158	7.30313	6.83384	7.15606	7.42895
2610507B11Rik	8.31288	8.31002	8.14251	8.94288	8.47349	8.17549	8.88755	8.95686	8.31045	7.8376	8.77151	8.83799	8.43756	7.83892	7.98988	8.34628	8.18281	8.07201	7.83972	8.15727	8.19255	8.85197
2610507I01Rik	5.60022	6.25193	6.06651	5.33314	5.34385	5.10347	5.26328	4.93411	5.91076	5.83535	6.36013	6.40034	6.78355	5.18457	5.51803	6.40784	5.55162	5.88251	5.35744	5.68253	5.43345	6.15465
2610524H06Rik	7.0812	7.02652	7.27506	7.4798	6.73184	7.21681	7.01255	6.91036	7.35298	7.20542	7.36656	7.34952	6.87651	7.21528	7.45404	8.05171	7.06826	7.54831	7.25955	7.95947	7.63718	7.65431
2700029M09Rik	9.09654	9.02322	8.87953	9.15712	9.14299	9.04582	9.25745	8.5789	8.914	8.8211	8.23201	8.4769	8.06634	9.12857	9.26813	8.53816	9.45393	9.39813	9.19217	10.2602	9.95797	9.23308
2700038G22Rik	6.40044	6.58837	6.51811	6.95111	6.52428	7.1766	6.62556	6.67994	6.36817	6.7158	6.60461	6.1804	5.69665	6.34365	6.64196	6.23249	6.92851	7.17034	6.75128	6.83461	7.1002	7.72468
2700049A03Rik	7.15959	6.94317	7.27473	7.46121	6.43897	7.35035	6.76322	7.09307	7.23444	6.93785	7.25472	8.21237	8.07415	6.95336	5.99134	7.56436	6.98205	7.45595	7.18472	7.95094	6.75066	6.653
2700060E02Rik	10.5129	10.1125	10.2704	10.036	9.99651	10.0106	10.1881	10.4462	10.0176	10.3795	10.1849	9.89758	9.74753	9.90695	10.3137	10.5917	9.92204	9.97329	9.7831	10.6165	10.0988	10.0511
2700062C07Rik	6.22948	7.06781	6.6692	6.96118	6.82133	7.272	6.85654	7.25294	7.36108	6.69211	6.78621	6.23324	6.44667	7.0925	7.0855	6.05271	7.05051	7.03644	6.90672	8.02959	7.82123	7.43442
2700081O15Rik	7.41197	6.98976	7.38092	7.10638	7.47115	7.00436	7.17226	7.45917	7.27099	7.72368	7.80553	7.95493	7.53919	7.11098	7.59516	7.62622	5.58604	6.3057	6.9771	5.43191	6.5869	6.19574
2700094K13Rik	10.9919	10.6	10.7017	11.1406	11.0687	11.1074	11.1912	10.9577	10.7472	10.4284	9.3133	10.0493	9.92775	10.5421	9.76049	10.1735	10.2067	9.93638	10.6469	10.5443	10.5013	10.5633
2700097O09Rik	7.43953	7.27428	7.51551	7.82495	7.54452	7.78707	7.53172	7.09473	7.6499	7.18009	7.72648	7.98291	8.03332	7.86784	7.89515	7.97492	7.91203	7.96162	8.17465	8.32162	7.5269	6.43119
2700099C18Rik	7.65081	7.11888	6.74084	7.67363	7.69713	7.75265	7.35588	7.29174	7.72641	7.9344	6.22075	7.45601	6.51907	8.68153	8.18925	7.1904	7.38823	8.11181	7.51995	8.00355	7.42308	7.18407
2810001G20Rik	5.36677	5.61601	5.38956	5.75222	5.07955	4.5606	5.39307	5.46221	5.52041	5.1671	5.19476	5.77425	5.47362	5.13661	5.17633	5.32789	5.2717	5.72063	5.47023	5.54561	4.76944	5.44737
2810002D19Rik	5.22149	5.79856	5.48381	6.27665	5.52357	6.74956	5.97763	5.6316	5.72041	6.15897	5.38747	5.91821	4.65757	5.82933	6.15338	5.58125	6.03555	6.10167	6.02942	5.68838	4.87399	5.23207
2810004N23Rik	8.32632	8.08986	7.76567	8.74327	8.68247	8.87192	8.45358	8.46772	8.47504	8.17148	7.60623	7.85019	7.78202	8.11224	7.968	7.93279	8.46437	8.16837	8.62224	8.48761	7.83218	8.52071
2810006K23Rik	7.90555	7.10575	7.28178	7.12444	7.10474	7.12466	7.37833	7.16053	7.61952	6.53907	6.58095	7.06099	7.0319	7.41997	6.28007	7.35398	7.01052	7.12748	7.42366	6.51438	6.82073	7.09935
2810013P06Rik	6.54623	6.88451	6.74771	6.90472	6.15143	6.7306	6.18812	7.37711	7.9334	6.72605	6.9925	7.05798	8.05786	5.15118	7.22828	8.09075	6.54575	7.64923	6.38372	7.94759	7.2046	7.27048
2810021J22Rik	4.82146	5.08233	4.57081	4.63939	5.30438	4.76009	5.06649	4.19185	4.1948	4.19524	4.18596	4.69819	4.45504	4.69138	5.44037	4.75922	4.68849	5.35975	4.57461	5.5104	5.44027	4.78859
2810025M15Rik	10.6629	10.2509	10.3866	10.0008	10.0433	9.91702	9.96436	10.5658	10.2392	10.32	8.97787	8.50653	8.94241	9.13738	8.52745	9.27916	8.05869	8.10145	9.10604	8.24751	9.42198	9.23036
2810403A07Rik	9.45115	9.51839	9.27482	8.9385	9.2764	8.8096	8.91997	9.36049	9.67802	9.69829	10.0401	9.85119	9.69656	9.00154	9.55722	10.0912	9.2378	9.56294	8.8558	9.06606	9.08668	9.00182
2810403D21Rik	3.94376	4.12315	3.66291	3.80283	3.74261	3.83652	3.9039	3.63773	3.59487	3.97287	4.09544	4.25236	3.66744	3.92763	3.59305	3.59194	4.20892	3.80492	4.08302	3.87351	3.96591	3.71179
2810408A11Rik	4.93557	4.42433	4.46355	4.62989	4.27483	4.91788	4.68105	5.21407	4.32608	4.63414	4.30095	4.81166	4.98801	5.30883	5.15074	4.17625	5.14384	4.77579	4.67537	4.574	4.29389	4.14521
2810408I11Rik	7.74563	7.38101	7.53444	7.77217	7.51256	7.92429	7.1894	8.14061	8.01319	8.13365	6.75556	7.35769	7.5566	8.34501	7.42578	7.8355	6.88567	7.45032	7.28493	8.32126	7.51625	7.28254
2810417H13Rik	10.9315	10.3898	10.0633	11.0294	10.8491	11.2425	11.1735	10.755	10.8384	11.0737	8.40952	9.62829	9.13502	10.7346	10.8803	10.153	10.5485	10.2102	10.4116	11.0832	11.2107	11.1061
2810428I15Rik	7.20006	7.16867	7.51768	7.66659	7.37409	7.64607	7.24883	7.33734	7.31079	7.01755	6.14103	7.17247	7.18066	7.02819	7.2197	7.4647	7.65147	7.2766	7.658	7.29475	7.37283	7.6802
2810429I04Rik	3.43274	3.28881	3.47822	3.73975	3.49252	3.56524	3.43149	3.91351	3.19672	3.2797	3.16488	3.16474	3.5235	3.6166	3.16581	3.1647	3.2944	3.52148	3.5075	3.1669	3.26785	3.26965
2810468N07Rik	5.53447	5.71215	4.70727	5.13604	5.09331	5.22941	5.8033	4.34286	5.66302	5.3722	5.86869	4.33314	5.50569	5.01284	5.16423	5.0159	4.64877	4.88672	5.25782	5.30494	4.3547	4.35553
2810474O19Rik	8.98603	9.24737	9.50612	8.44888	8.71254	8.87769	8.48968	8.88272	8.3218	9.11676	9.22835	9.52488	9.3215	10.0728	10.2729	9.64718	8.49525	9.23531	8.86651	9.8709	9.63328	9.53677
2900026A02Rik	6.48586	6.43735	6.0072	5.20308	6.18949	5.78994	5.5489	5.33423	5.94671	5.16013	5.8445	6.71015	6.18398	5.85028	5.77639	5.76009	5.38548	4.97463	5.7108	5.00667	5.95458	6.09626
2900076A07Rik	5.16058	5.63314	5.32394	4.96234	5.06615	5.23902	5.52888	5.50658	5.25145	5.19055	5.61366	5.8085	6.03965	5.20943	5.191	5.47643	5.22505	5.48594	5.26702	4.56045	5.2058	5.23484
2900097C17Rik	6.81381	6.99677	7.27626	7.62082	7.72918	7.39089	7.65794	7.41006	7.1346	6.75918	7.32443	7.28074	7.68564	7.30664	6.52484	7.91437	6.80773	7.44441	7.10807	7.5914	7.52157	7.539
3000002C10Rik	3.24609	3.55086	3.19619	3.44768	3.17753	3.70347	3.38787	3.1762	3.28846	3.92909	3.19409	3.67412	3.17517	3.17318	3.36115	3.67123	3.66983	3.48821	3.30178	3.34709	3.47093	3.31119
3010026O09Rik	6.84402	6.72507	6.61337	7.07549	7.02374	7.24802	6.9309	6.76258	7.69411	7.397	6.01609	7.16229	6.67005	6.81734	6.56985	6.8702	6.69651	6.02959	6.5556	6.47012	6.77628	6.78051
3110001I22Rik	5.58744	5.41112	4.66808	5.81347	5.9424	6.5631	5.63438	5.40855	6.2663	5.68657	6.12536	5.76411	6.34697	5.78916	4.67247	6.47057	6.32145	5.97116	6.49666	6.80424	5.65412	5.88285
3110002H16Rik	8.08653	8.09704	8.07087	8.17553	7.67684	8.29737	8.15943	8.35932	8.90188	8.03766	8.36961	8.03445	8.33309	8.04611	7.20607	8.25787	7.59723	7.95187	7.70951	7.77924	7.60723	8.14942
3110009E18Rik	5.39563	5.1376	5.61351	5.48616	5.10304	5.49757	5.11827	5.42279	5.08563	5.51266	5.37202	4.67695	5.24169	5.58037	5.45706	5.44028	5.36062	5.76819	5.71737	5.54766	5.63358	6.04233
3110040N11Rik	7.02408	6.87324	6.67998	6.8464	6.49327	6.90822	6.89606	6.736	6.47062	6.21735	7.03425	6.45802	7.40495	6.70278	6.30484	7.21649	7.0869	7.17512	6.80966	6.61375	7.08738	6.9934
3110043O21Rik	5.59555	6.44683	6.41353	6.69406	5.65984	4.41874	6.45836	4.42767	4.44672	5.82449	7.41763	6.52995	6.73024	6.83365	7.93479	4.38358	6.14709	5.77145	5.6942	6.9751	6.6888	7.27103
3110045C21Rik	5.01545	5.03612	4.65844	5.08094	5.18636	5.03686	4.84446	5.00899	5.28187	4.87599	4.22951	5.09025	4.99069	4.61027	4.35999	4.22894	4.86534	4.97158	4.72305	4.94395	4.54964	4.24294
3110052M02Rik	5.04655	5.76141	6.17231	5.40936	5.51921	5.53795	5.50313	5.39368	5.04675	6.3352	6.36775	4.60831	5.92921	5.0944	5.20864	5.88084	5.57589	5.8658	6.4247	5.89202	5.57696	5.62369
3110056K07Rik	4.9601	5.19322	4.38573	5.33684	4.96242	4.39185	4.94434	5.20722	4.44705	6.12738	5.84297	5.60733	4.7927	5.49619	5.80017	6.09655	5.55576	5.84952	4.65588	6.01733	5.95301	4.73618
3110062M04Rik	5.15974	5.0755	5.20629	5.30667	5.57476	5.34824	5.26242	5.41773	5.68516	5.51722	4.94853	5.9733	5.53908	5.47893	6.07626	5.61837	5.36985	5.72615	5.62559	6.07096	5.66351	5.63105
3110082I17Rik	6.89004	7.20057	7.44538	7.59142	7.23901	7.38399	6.94942	6.96491	7.30421	7.2469	5.28154	5.89214	6.49043	6.5743	6.66211	7.07779	8.09205	7.95036	7.51407	6.73256	7.48544	7.42902
3632451O06Rik	4.70822	3.83801	3.8363	3.83745	4.10033	3.83745	4.44721	4.48411	3.86413	4.92654	3.83574	4.01811	4.58387	4.4534	3.83688	4.77006	3.83586	3.83496	4.60703	3.88347	4.10899	3.84117
3830406C13Rik	6.1631	6.47777	6.25599	6.96788	6.01753	6.96809	6.87309	7.18098	5.25416	5.95827	7.12047	6.47753	6.87625	6.68487	7.1476	6.07211	6.58758	6.62127	6.23699	8.06087	7.42839	6.84093
3830408C21Rik	3.17066	3.26524	3.13905	3.53541	3.21626	3.60682	3.13853	3.14001	3.14066	3.14076	3.62548	3.57226	3.13931	3.53434	3.68938	3.1386	3.46225	3.20896	3.33179	3.14015	3.765	3.14186
4632404H12Rik	3.90974	3.88541	4.44085	3.68765	4.21408	4.21172	3.9264	3.51483	3.5163	4.10775	3.83414	3.59363	3.51323	3.88277	3.69701	3.85308	3.98834	3.58566	3.61466	3.51513	3.51873	4.43303
4632415L05Rik	4.45106	5.97037	4.77531	5.56107	5.27221	4.42075	4.73225	4.81502	6.68797	5.3266	6.43298	4.86922	7.10781	6.17266	6.47414	6.48496	5.33924	5.85849	5.73358	5.1714	6.0872	6.20554
4632427E13Rik	5.5743	5.57742	6.13196	5.38855	5.70239	4.91681	5.6391	5.77907	5.70312	6.37218	5.43016	6.01415	4.68284	5.94545	6.12184	6.02156	5.97835	6.40168	5.55345	5.39732	5.9388	5.62604
4833417C18Rik	4.02695	3.67829	4.03056	3.62415	4.0796	3.7458	3.47852	3.48144	3.48272	3.51399	3.55829	4.25189	3.48005	3.64222	4.08561	3.47865	3.7319	4.158	3.71063	4.16857	4.08453	3.68387
4833420G17Rik	8.35235	8.19531	7.81998	7.72426	8.0615	8.33952	7.39561	8.40678	8.9122	8.92372	8.79945	9.12413	9.31003	8.39832	8.91345	9.05902	8.58017	8.70222	7.80744	9.09619	8.85755	8.34498
4833439L19Rik	9.71255	9.6714	9.58806	9.26614	9.9267	9.10763	9.18389	9.28908	9.67823	8.88314	9.06688	9.2247	8.86352	8.92759	9.12284	8.99462	9.10688	9.27096	9.10664	8.53152	8.46435	8.52039
4921524J17Rik	8.52974	8.33908	8.87982	8.65035	8.93711	9.2832	8.94175	8.20611	7.51299	8.80056	9.35535	9.01374	9.07828	9.20339	8.59283	8.82964	7.66341	8.3855	8.82313	8.07305	8.08308	7.65474
4930402H24Rik	7.17118	7.12006	7.57074	7.11863	7.11678	6.80246	6.76374	7.51558	6.69213	6.30121	8.23901	7.63516	7.25341	7.19834	6.35853	7.46228	5.9862	5.70436	6.62192	5.97432	5.02404	6.41154
4930427A07Rik	5.46371	5.01213	4.87603	5.39033	5.34972	5.06082	5.68594	4.4162	5.90492	5.27822	4.40937	4.83681	5.30757	4.91397	4.87185	4.91804	5.6532	4.90805	5.1641	4.79198	5.1871	5.25015
4930430F08Rik	5.48355	5.50144	5.28629	5.74589	5.24783	5.11183	5.09904	5.49849	4.98454	5.14804	4.90263	5.30205	5.40235	4.98424	5.59612	5.26893	5.54937	5.2884	5.32109	5.71494	5.16025	4.67536
4930447C04Rik	3.98543	4.67088	4.81968	4.21164	4.29426	4.43351	4.33951	4.27658	4.43476	3.98098	4.6167	4.09465	5.45506	5.16669	3.97436	3.97053	4.58634	5.30103	4.76093	5.327	4.68425	4.33608
4930452B06Rik	5.00869	5.64986	5.30868	5.27898	5.20419	4.86921	4.97714	4.21103	4.29083	5.03027	4.71077	5.24064	5.224	5.55281	4.74255	4.20322	5.10415	4.33381	4.88973	4.63156	4.22039	4.22105
4930453N24Rik	8.27168	7.2371	7.89534	7.74714	7.57963	8.02542	7.27314	7.21692	7.12535	6.93131	7.36039	7.8869	7.80371	7.65422	8.17474	7.77971	7.93965	8.14675	7.88077	8.03131	8.17753	7.11611
4930486L24Rik	3.5521	4.13488	3.54626	4.05158	4.55513	4.13437	3.84749	4.01289	3.54982	3.67146	3.54554	3.76411	3.9005	3.8413	3.95224	3.54525	3.78939	4.31759	3.90092	3.65854	4.14607	3.75664
4930503L19Rik	8.17822	8.55685	8.02905	8.23309	8.66435	8.8895	7.94485	7.98839	8.46109	8.68551	6.28579	7.7776	6.51313	8.27982	7.78138	8.62017	7.52114	7.57671	8.19902	7.9069	7.95637	7.88116
4930526I15Rik	3.46089	3.89734	3.68514	3.35422	3.36682	3.45747	3.40665	3.56158	3.46202	3.59331	3.45935	3.69868	3.83508	3.46683	3.37112	3.73903	3.60385	3.62636	3.39468	3.44899	3.51471	3.59228
4930539J05Rik	4.39257	4.30598	4.36708	4.51916	4.40913	4.3641	4.51735	4.44826	4.09327	4.11756	3.97934	4.13096	4.01169	4.20348	4.01388	4.03433	4.28947	4.20128	4.31319	4.07546	4.08049	4.05793
4930542D17Rik	5.29052	5.17656	5.75168	4.98855	5.02134	4.92031	5.43269	5.42383	4.91235	5.45859	4.25815	4.03401	4.07481	5.37115	4.03931	5.24652	4.03522	4.03156	4.38992	4.04459	4.05538	4.05619
4930556M19Rik	4.146	3.92015	4.40153	3.89366	4.13213	4.29045	4.07776	4.28664	4.15646	4.33845	3.92253	4.05845	4.15561	4.19638	4.51652	4.54739	4.1209	4.14998	4.13812	3.81288	3.84511	3.81577
4930558J18Rik	3.85374	4.21406	4.44023	4.23906	4.13303	3.99006	4.0796	3.85079	3.85193	4.59138	3.84853	3.84835	4.31425	4.49808	4.67502	3.8483	4.19951	3.84774	4.15439	4.17067	4.54781	4.77557
4930563E22Rik	3.11301	3.10838	3.10559	3.4011	3.7895	3.10747	3.10411	3.53546	4.2222	3.1104	4.33594	3.10438	3.10632	3.43218	3.10653	4.61328	3.52262	3.5666	3.18514	3.47398	3.11313	3.11347
4930578C19Rik	5.34781	5.71532	5.96001	5.0053	4.99251	5.58913	4.35837	4.46587	5.35932	4.45835	5.03784	4.63241	4.03805	4.80818	4.03859	4.79479	4.12826	4.35787	4.8696	4.04399	4.05501	4.05584
4930579G24Rik	7.02067	7.57874	7.09584	6.75391	6.59196	8.2053	7.25484	5.98976	6.44514	7.23077	7.07956	6.1622	7.68682	7.98821	7.36018	8.32812	8.12517	7.85951	7.12811	7.79307	7.42303	8.05548
4931406C07Rik	4.97346	5.32234	5.71139	5.72912	5.43533	4.46911	6.09059	4.7301	4.87468	6.39956	5.11415	5.16834	6.36855	5.89029	4.87743	5.78408	5.81362	6.05723	5.53587	5.44156	7.17783	6.05081
4931406P16Rik	9.00369	8.87123	9.24401	8.17534	8.52525	8.46074	8.35333	8.71274	8.02544	8.64656	8.26644	8.99884	8.96694	8.7249	8.3768	8.41546	7.2275	7.31892	7.65412	6.39524	5.37266	6.60814
4931414P19Rik	4.02098	4.28724	3.97824	4.62856	4.26061	3.92585	4.11915	4.8633	5.44677	4.69725	4.93695	3.92115	4.45593	4.58222	3.95465	5.07332	4.81098	4.67894	4.29066	4.14521	3.97927	4.64264
4932416H05Rik	3.53143	4.03782	3.51669	3.49958	3.50118	3.56089	3.49801	3.78904	3.50083	3.76908	3.74927	4.08639	3.82435	3.66899	4.21898	4.02917	3.76635	3.49768	3.80914	3.89024	3.90913	3.85561
4932438A13Rik	8.62401	8.11604	9.01297	8.25428	8.24936	7.63365	8.50216	8.70774	8.94665	8.67872	8.75692	9.0483	9.32599	8.80501	8.19274	9.77421	7.26403	7.65813	7.95312	8.10805	8.26883	8.3651
4933404O12Rik	3.43	3.32246	3.32067	3.77419	3.41765	3.32187	3.55998	3.58341	4.13608	3.35537	3.52394	3.31989	3.85116	3.79712	3.90727	3.54872	4.18045	3.45631	3.70905	3.73942	3.32554	3.46521
4933407K13Rik	4.35599	4.18233	5.03186	4.62009	4.26807	4.37753	4.36608	4.45581	4.98137	4.72559	4.74917	4.15985	5.40603	4.63319	4.05792	5.209	4.12241	4.755	4.34653	4.54027	4.67199	4.16234
4933412E12Rik	4.31255	3.83166	4.49646	4.30273	4.02342	4.73165	4.03521	3.97565	3.65538	3.65569	3.7868	4.42955	4.75014	4.8268	3.6513	3.64878	3.96089	4.02697	3.64909	4.16403	3.65878	3.65917
4933427D14Rik	6.46936	5.21541	5.69642	5.8291	5.36689	5.98686	6.30973	6.13656	6.75294	5.45514	6.18536	6.47637	7.00242	6.28004	6.87907	6.07721	5.83302	5.64586	6.04768	6.46199	5.97978	5.08674
4933431E20Rik	3.87219	3.66539	3.28528	3.28602	3.28738	3.28602	3.67676	3.28635	3.28708	3.36088	3.90598	3.86921	3.28556	3.5189	3.81635	3.28477	3.39737	3.60549	3.43788	3.49193	3.28829	3.76551
4933434E20Rik	9.38105	9.42487	9.50701	9.85939	9.79359	10.8584	9.64158	9.97049	9.28865	9.26261	9.94575	9.11998	9.7718	9.76427	9.94805	9.63986	9.55121	9.61151	9.81767	10.0471	9.73497	9.43671
4933439C10Rik	3.80841	3.95337	4.46021	4.22594	4.14688	4.14912	4.00448	4.71887	4.31045	4.84508	3.798	4.42266	4.32554	3.79521	4.6557	5.26884	4.40774	4.00811	3.89125	4.03609	3.93005	4.29509
5031425E22Rik	4.23339	4.13877	4.1591	4.32525	4.40917	4.17942	4.1964	4.09691	4.37488	4.17023	4.87832	4.58193	4.48371	4.17492	4.10912	4.20127	3.97767	4.2259	4.27311	4.14365	4.13495	4.522
5031439G07Rik	4.82261	4.78659	4.33481	4.18582	5.19458	4.05388	4.61237	4.05553	5.48175	4.05966	4.3743	5.51417	4.81	4.28155	4.70521	4.46974	4.37936	4.72749	4.35257	4.62094	5.26718	5.64245
5033406O09Rik	6.58469	6.85286	6.8812	6.40206	5.53455	5.80059	5.95414	6.52491	6.78407	6.51247	6.1699	6.13311	6.80949	6.52298	6.6517	6.73961	6.76522	6.57679	6.49743	5.13416	5.97119	6.05726
5430405H02Rik	4.19386	4.35353	4.39973	4.05009	4.26704	3.92062	4.10449	4.36404	4.42423	3.98533	4.31049	4.03199	3.98346	4.14758	4.22768	4.36327	4.14755	4.07586	4.04913	4.10424	4.17453	3.98581
5430416N02Rik	6.55154	6.86067	7.37399	7.12018	6.36111	6.68035	6.69185	7.30314	6.7776	6.75447	6.0693	7.05808	6.67168	6.87408	6.61372	6.81271	7.05249	6.97634	6.63667	7.22008	6.64669	7.03942
5530601H04Rik	6.95223	6.34525	6.1699	6.6503	6.09146	6.30668	6.55396	5.82281	5.38005	6.72498	7.08759	6.63603	6.32405	6.60184	5.86905	6.40644	6.59932	6.59852	6.39867	6.57004	6.63214	6.64677
5730408K05Rik	4.48446	4.27978	4.366	4.59048	4.81239	4.79201	4.60136	4.49353	4.90955	4.79983	4.64228	4.65468	4.60427	4.41843	4.59609	4.78187	4.71496	4.9859	4.53142	4.99977	4.68093	4.68775
5730409E04Rik	3.54055	3.53828	4.14043	3.91767	3.94355	3.53784	3.91454	3.99183	3.96108	3.74783	3.53649	4.19769	3.53729	3.79404	3.61318	4.11085	3.76571	3.5794	3.69099	3.53843	3.65404	4.26511
5730455P16Rik	7.27429	7.313	6.86134	7.73624	7.2339	7.35739	7.55713	7.51722	7.47907	7.86071	7.15737	7.07197	6.33892	7.65567	7.58344	7.98031	6.68512	7.73384	7.75707	7.22136	7.17167	6.9054
5730460C07Rik	2.92549	2.92292	2.92139	3.5645	3.23874	2.92242	3.36472	2.92288	3.44684	2.92404	3.77796	2.92072	2.92179	2.91966	2.9219	3.78231	2.92099	3.32864	3.36744	3.18192	2.92555	2.96528
5730480H06Rik	3.28483	3.43626	3.23531	3.46433	3.39479	3.16019	3.15756	3.38733	3.16228	4.48368	3.44464	3.57702	3.18724	3.78927	4.2933	3.48496	3.23037	3.59741	3.38959	3.25624	3.16464	3.1649
5730507C01Rik	5.53426	5.57372	5.47091	5.47502	5.85986	5.79712	5.44041	5.05176	5.9645	5.77225	5.55365	6.73648	6.34116	6.34102	6.17362	6.37108	5.53999	6.39783	5.91876	5.74267	5.73023	4.85231
5730508B09Rik	4.4932	5.10042	4.60848	4.63621	5.0502	5.18653	4.75183	5.23187	4.98991	5.37751	5.58531	5.62123	5.91603	5.43354	5.90634	5.19209	4.8403	5.34301	4.81497	5.73102	4.86749	5.34484
5830417I10Rik	4.9952	4.73958	5.04209	5.02504	5.34533	4.71853	4.85473	5.52311	5.4483	4.81044	5.39992	4.41851	4.98335	4.71821	6.00831	6.29161	4.89862	5.40827	4.77619	5.45689	5.0666	4.69366
5930403L14Rik	3.73446	4.53456	3.25435	3.26769	4.27307	3.26772	3.47667	3.96527	3.28589	3.28769	5.8836	6.20717	5.77314	5.0019	5.4263	5.56096	3.24909	3.80821	3.24692	3.57883	3.30547	3.30761
5930412G12Rik	5.00469	5.1747	4.36084	4.4936	4.34132	4.00516	4.73254	4.92568	4.18912	5.06992	3.63733	3.63683	3.64012	3.63351	4.35506	3.63669	3.63766	3.63514	3.91685	3.64413	3.65161	3.65218
6030458C11Rik	7.79971	8.11567	8.23605	7.62815	7.63396	7.94857	7.90178	7.97411	7.48102	8.30949	8.63704	7.78866	7.3943	8.00276	8.0111	8.76026	7.79457	7.96992	7.64708	8.10382	7.00519	8.35406
6330403K07Rik	5.33746	6.03482	4.42249	5.73463	5.5933	5.94672	4.59247	4.58498	5.57996	6.49305	7.11548	6.64287	6.46329	5.67286	5.99017	5.13036	4.64019	6.0094	5.68476	6.0793	4.8886	4.93691
6330415G19Rik	3.66915	3.76227	3.23748	3.22444	3.17685	3.29307	3.19232	3.17547	3.53603	3.20696	3.70082	3.3174	3.3418	3.31948	3.56008	3.93441	3.40442	3.19064	3.31988	3.70242	3.56791	3.17825
6330416G13Rik	3.96836	4.58998	4.27043	4.02883	4.26802	3.95728	4.44511	5.14735	5.27976	4.47815	4.89653	4.38978	3.95496	4.60204	4.24484	4.86663	4.42295	4.3404	3.95145	4.85761	5.66692	5.64059
6330418K02Rik	3.09399	2.88604	2.88524	2.90615	2.98454	3.20677	3.0015	2.98939	2.88654	3.08766	2.88497	3.14462	2.99222	3.10274	3.17523	3.3604	3.15482	3.1015	3.02058	2.9083	3.22045	2.94524
6330549D23Rik	3.18355	3.24983	3.43915	3.35398	3.34662	3.1303	3.26482	3.20491	3.80531	3.11294	3.30443	3.09937	3.08103	3.49062	3.8405	3.15383	3.15786	3.46256	3.2079	3.42943	3.08436	3.15365
6430548M08Rik	4.7546	4.38385	5.00115	4.45916	4.36339	3.71181	4.02911	4.20646	4.43933	4.06896	3.70863	4.06713	3.7105	4.23175	3.71074	4.26542	3.70886	3.70717	3.92074	3.7132	4.54429	4.03939
6720489N17Rik	7.19958	7.17252	7.41644	7.64006	7.02613	6.55716	7.66685	6.08817	8.08607	8.35307	7.08578	8.32848	4.71446	8.94816	7.96088	4.33392	7.86446	8.41049	7.32794	6.46072	8.99427	7.69101
6820431F20Rik	4.92631	4.89536	4.93952	4.77479	4.75729	4.56868	5.04359	4.86204	4.76292	5.31112	5.22353	5.1099	4.76079	4.89201	5.28883	5.36625	4.91258	4.96389	4.75403	4.93474	4.65114	5.01312
8030462N17Rik	4.91467	4.19891	4.52705	4.26056	4.68437	5.02843	4.14878	4.7922	4.47258	4.18748	3.88123	3.88087	4.099	4.82458	3.8835	3.88077	4.62632	4.1322	4.31169	4.18247	4.009	4.57724
8430408G22Rik	10.8263	9.73147	11.1077	6.61251	9.80721	9.57017	8.05041	7.77483	8.69607	9.38789	9.44835	9.41911	7.40387	9.79177	8.95611	9.88208	4.99615	4.49705	8.63049	3.86267	4.06676	4.08056
8430429K09Rik	5.5161	4.94077	4.43513	5.30567	6.11937	4.47127	5.6201	4.87594	5.79374	5.17311	4.97357	5.05751	5.69497	4.4488	5.2777	5.33818	5.46875	6.0513	5.38125	5.34251	4.76045	4.86058
9030025P20Rik	3.11888	3.02502	2.98103	3.15108	3.05727	3.16802	3.06987	3.14264	2.98244	3.1846	2.99706	3.37774	3	3.3115	3.21683	3.04217	3.28734	3.23142	3.17126	3.04729	3.42279	3.32341
9030624G23Rik	4.09028	3.66667	3.79353	3.72586	3.82902	4.16001	3.7091	3.77597	3.79747	4.11715	3.80898	3.89868	4.10076	3.81562	4.27856	3.9093	3.82732	4.12838	3.84989	3.99888	3.62917	3.72475
9030624J02Rik	8.87427	8.6075	8.37517	7.69326	8.28691	7.97315	8.09957	8.38913	7.8711	8.41905	8.29964	8.06816	8.16957	8.06142	7.32325	8.00094	8.27774	7.80283	8.47922	7.84767	7.89649	8.32929
9130008F23Rik	4.11001	4.14672	4.16957	4.16939	4.13658	4.35672	4.18157	4.18261	3.94145	4.21506	3.93784	3.93765	4.55449	4.46197	4.29119	4.63248	4.2247	4.6689	4.40383	4.74452	4.674	4.34797
9130011E15Rik	6.0233	6.50164	4.67188	5.45618	5.71016	4.85127	4.93541	4.98069	6.05335	5.64879	5.31708	5.77469	6.19366	5.12795	6.40325	5.80878	5.58634	6.1366	5.5386	5.41083	6.21548	5.06606
9130019O22Rik	3.74878	3.87471	3.52614	4.3002	3.52974	4.16267	4.13991	4.03241	3.52923	3.52942	3.52552	3.79143	3.52663	4.01561	4.02329	3.52527	3.9607	3.79548	3.97488	3.93278	3.82834	3.95011
9130023H24Rik	5.51848	5.50462	5.80599	5.69908	5.55432	6.24008	6.6858	5.92132	6.37916	5.72094	5.83642	6.09169	6.05518	5.84245	5.26305	5.51467	5.71797	6.12863	5.88897	5.75128	5.96409	5.33557
9130401M01Rik	7.93564	7.72878	7.65517	7.80628	7.39868	7.35673	7.89677	8.09346	6.94923	8.10432	7.74989	8.01326	7.8068	7.40024	7.10367	7.65891	8.14658	8.29599	8.08667	8.28773	6.96066	7.85674
9230102K24Rik	6.22886	6.09574	5.70671	6.05173	5.42641	5.71361	5.74855	6.26864	5.56269	5.57543	4.03262	4.03128	5.24542	4.0222	4.17991	5.20933	4.03354	4.02666	4.38005	4.05087	4.07044	4.0719
9230110C19Rik	3.75762	4.21236	4.08014	4.4373	3.92448	4.63468	3.56305	3.99779	3.56893	4.21035	3.5636	3.56332	4.42892	3.56142	3.56541	3.56324	3.9874	4.41948	4.33055	3.94824	3.57188	3.57221
9230114K14Rik	4.39052	4.01534	4.58019	4.54808	4.91004	4.27392	4.3075	4.26676	4.55754	4.58167	4.91779	4.0108	5.0138	4.07639	4.77354	4.1662	4.50578	4.77402	4.13312	4.55252	4.36709	4.85733
9330020H09Rik	4.67932	4.61274	4.6965	4.91354	4.34169	4.62093	4.60187	4.45764	4.76494	4.55041	4.45472	4.2271	4.5338	5.01228	4.7271	5.10102	4.51332	4.82911	4.84867	5.0641	4.27646	4.60572
9330133O14Rik	5.79044	6.09641	6.01363	5.98063	5.74813	4.65768	5.03757	5.33491	5.09105	5.76569	6.38146	5.87029	6.25515	5.49587	5.15359	5.18086	5.45631	5.3246	5.28732	5.12211	5.75331	5.24659
9330151L19Rik	3.2168	3.25067	3.25454	3.18583	3.23785	3.18583	3.44364	3.27085	3.30409	3.30603	3.58774	3.50678	3.70124	3.184	3.42401	3.18468	3.59335	3.51171	3.64991	3.40786	3.71122	3.3016
9430015G10Rik	7.73359	6.70717	6.87719	6.55753	7.32283	6.27373	7.31373	7.46774	6.92954	7.25315	7.05795	6.2867	6.7044	6.66523	6.56577	6.10837	7.51077	6.88704	6.95335	6.46469	6.4443	7.67635
9430016H08Rik	7.85304	7.56771	7.9388	8.01091	7.77105	8.56668	8.16529	8.20099	8.30907	8.18455	7.24816	7.83624	8.31126	8.59243	7.69082	8.68685	7.91563	8.2469	7.99143	8.08255	8.20372	7.78227
9430020K01Rik	8.67769	8.74751	9.19677	7.76751	8.21122	7.12936	8.03075	7.98911	7.84498	8.22855	9.35765	8.60039	8.86802	8.63827	7.47073	8.49961	6.73138	7.17401	7.87091	6.36833	5.76853	5.10334
9430038I01Rik	6.1628	6.73162	6.74396	6.6455	6.17428	6.52223	6.3445	6.05914	6.53951	6.02976	6.43013	5.29908	6.08294	5.81517	6.25841	6.05073	6.37143	6.13717	6.02152	6.36753	6.81441	6.98277
9530068E07Rik	9.82312	9.42695	9.57365	9.72309	9.28196	9.11848	9.31065	9.43926	9.30095	9.29311	10.2167	9.99184	9.78581	9.64823	9.33517	9.60473	9.45036	9.32496	9.32132	9.46008	9.46575	10.0448
9530077C05Rik	4.12518	3.88661	3.96554	4.09714	3.94543	3.99265	4.13538	3.63864	4.30676	3.85047	3.6361	3.98793	3.63725	4.13371	3.63739	4.34007	3.9753	3.94873	3.95473	3.89133	4.14665	3.77349
9530082P21Rik	7.31573	7.67458	7.34363	6.4033	7.31342	6.7915	6.69267	7.47867	7.42181	7.03356	6.60088	7.13579	5.8886	6.22918	6.8836	6.76742	6.5948	6.3731	6.6277	5.65671	5.28317	5.91488
9830147E19Rik	5.0591	6.45031	5.88504	5.536	5.96555	6.58902	6.28176	4.35597	6.67461	6.94606	4.35506	7.30068	8.08222	6.6626	4.45482	4.22721	5.9586	6.31407	4.7565	7.85355	6.54023	5.94277
9930012K11Rik	7.01389	7.65965	7.558	6.85691	7.59118	7.12735	7.18204	7.25758	7.90244	6.77429	7.98261	6.84624	6.97356	6.53069	7.42105	7.84684	6.83499	7.47294	7.07929	5.24338	5.63751	5.85695
9930021J03Rik	6.8938	7.0582	7.2	6.45955	7.75124	6.25503	7.11437	6.63917	6.9206	7.38297	7.66482	8.70461	7.57238	7.65084	7.07543	7.10097	6.90137	7.22369	7.05607	7.42118	7.26874	5.79566
9930104L06Rik	5.57374	5.62647	5.6115	5.346	5.06457	5.91979	5.25982	5.50323	4.55295	5.85142	5.42932	5.2727	5.3835	5.11386	5.0616	5.95621	5.16351	5.6234	5.37594	4.85043	4.8997	5.68555
A130010J15Rik	5.99747	5.57238	4.77055	5.47416	6.50648	6.31461	6.03025	5.68364	6.7383	5.43585	6.22552	6.76086	6.10644	6.74415	6.24958	7.60608	6.75087	5.76622	6.21097	6.34689	6.32322	6.17452
A230046K03Rik	8.66847	8.06703	8.70891	8.32217	8.46051	9.18026	8.66048	8.65607	7.83892	8.75258	9.01355	9.04744	9.41428	9.2406	9.1351	9.32678	7.55683	9.10881	8.85108	8.49596	9.29881	8.59764
A230050P20Rik	4.0638	4.53258	4.21581	3.66625	3.73592	3.66625	3.74363	3.99965	3.66866	3.92595	3.80595	4.50193	4.20202	3.66171	3.94643	4.43317	4.12962	4.65021	3.95514	3.92385	4.1569	4.04694
A230056P14Rik	3.221	3.05196	3.22817	2.86949	2.8708	2.86949	3.10181	2.86981	2.87052	3.21857	2.94162	3.24513	3.17473	3.07984	3.50921	2.86827	3.10241	2.86792	2.88719	3.07588	2.87169	3.27108
A230072C01Rik	4.02999	4.71552	4.01374	4.33024	5.05719	4.01788	4.39652	4.2621	4.02371	4.90344	4.74821	4.17326	4.01534	4.80471	4.88236	6.05464	5.16917	5.23379	4.87228	5.26128	4.43884	5.10386
A330040F15Rik	3.09142	2.75371	2.72841	2.91405	2.73013	3.07855	2.72793	3.0645	2.72989	2.72997	3.079	2.95959	2.72865	3.08622	2.82997	2.72799	2.72818	2.79044	2.78123	3.16409	3.05064	3.00978
A330069E16Rik	3.84448	3.93202	3.62419	4.06283	4.21914	3.626	4.4068	3.6572	4.6888	3.69652	3.62331	3.62303	3.62489	3.69246	3.81711	4.25666	4.10542	4.47133	4.48838	4.28341	3.93459	4.2047
A430005L14Rik	8.09055	7.80645	7.45459	8.64106	8.63221	8.56157	8.42884	8.33248	8.10604	7.95587	7.49708	7.69859	7.29447	7.75847	7.22656	6.39053	8.3648	7.8634	8.49522	7.98365	7.97662	8.16775
A430033K04Rik	5.68438	5.05196	5.00496	5.87774	4.90244	4.49631	5.79262	5.99776	5.38656	5.43053	5.89947	4.82477	6.50913	5.67867	5.90725	4.99494	5.24958	5.47978	4.93194	5.94141	6.45892	4.98819
A430090L17Rik	2.88678	3.1112	3.22307	3.11696	3.24878	3.09852	3.29339	2.88484	2.88559	2.8857	3.33327	3.5262	3.26823	3.40872	2.88412	2.95569	2.9225	2.88284	2.90259	2.885	3.04424	2.88697
A630001G21Rik	4.55752	4.36602	3.66037	3.51093	3.52713	3.51094	3.49432	3.51498	3.52366	4.61265	3.73134	3.49568	4.51725	3.56997	3.50635	5.07944	5.06664	4.89829	4.48034	5.85844	6.12874	6.03536
A630033H20Rik	6.01006	5.70926	6.90964	5.43426	5.56589	5.9733	6.98671	6.64695	4.71303	4.9285	7.15496	6.45243	6.61971	6.45582	4.62487	7.14058	6.0051	5.75947	6.53149	6.39759	6.8282	6.12618
A630066F11Rik	3.81877	3.90901	3.59457	3.90961	4.01343	3.85596	3.75126	3.59653	4.13556	4.00404	3.59391	4.35661	3.99356	4.09538	3.59525	4.30544	4.30559	4.19764	3.80588	3.59681	3.79206	3.87765
A630072M18Rik	4.38015	4.26393	4.67576	4.37692	4.74381	5.04967	4.63399	5.25978	4.56513	5.06188	4.62905	4.12773	4.74277	4.48288	4.24351	4.21827	4.34881	5.43844	4.55616	4.81078	5.4603	4.83178
A630089N07Rik	6.49801	6.44232	6.3399	6.61203	6.25392	6.96862	6.16744	7.00361	6.64318	7.09479	6.70305	6.80316	5.84416	6.78199	7.01469	6.70356	6.71793	6.99104	6.34373	7.00871	7.18415	6.51706
A730017L22Rik	3.14506	3.64961	3.09503	3.10786	3.04682	3.30034	3.01361	3.57273	3.01629	3.15312	3.33128	3.01373	3.47758	3.2528	3.26692	3.05077	3.05297	3.06369	3.24701	3.01565	3.3752	3.54295
A830010M20Rik	3.56868	3.47927	3.52994	3.47832	3.90358	4.5158	3.47482	3.4792	3.4811	4.11654	3.57163	4.12146	3.47712	4.38131	3.58844	4.47252	3.6394	4.72	3.9951	3.4796	3.89588	4.17885
A830080D01Rik	6.79001	7.7181	7.31353	7.01278	7.1867	7.97367	7.22025	6.06484	4.55046	8.34946	8.03158	7.98852	8.58028	7.43761	8.47527	5.20391	7.99235	9.21086	7.99429	7.65	8.0912	6.9784
A930005H10Rik	5.88877	6.22494	5.81588	5.84968	5.35621	5.58213	5.18227	5.57034	5.76967	5.61281	5.95599	5.79369	5.94529	5.74331	5.95662	5.44751	6.2238	5.90209	5.95741	6.10124	6.08789	6.4515
A930006K02Rik	3.74437	4.24285	4.12138	3.94074	4.4609	3.53331	3.70193	3.97794	4.54224	3.68979	3.53097	3.95795	3.53234	4.06622	3.53252	3.53066	3.91926	3.70666	3.55288	3.95169	4.12804	3.6849
A930013F10Rik	4.10065	4.48458	3.86553	4.03994	3.77365	3.7456	4.48486	3.83245	4.23671	4.22795	4.32806	3.76009	4.45791	4.39943	4.20998	3.90973	3.77786	4.00613	3.87009	3.83486	3.96608	3.77913
AA465934	3.03554	3.05466	2.94982	3.01031	2.97687	3.33632	3.09316	3.07349	3.33634	3.13252	2.96581	3.14903	3.1059	3.08241	3.15512	3.14765	3.11697	3.18847	3.17753	3.21913	3.06245	3.16358
AF357425	3.8697	3.4283	3.44752	3.93616	3.62268	3.67761	3.77731	4.30564	3.77012	3.63735	3.32051	3.60877	3.45501	3.66624	3.80404	3.32027	3.32063	3.31969	3.66877	3.35141	3.39735	3.32616
AI314180	8.05366	8.45743	8.15596	8.58325	8.77112	8.67234	8.39895	8.29414	8.51404	7.96634	8.11295	8.13566	7.9259	8.20014	8.69666	8.13031	8.43448	8.3011	8.38034	8.84994	7.24615	8.35872
AI413582	5.42594	5.95621	5.44387	5.66041	6.32046	6.07222	5.10944	6.13071	5.1759	5.76317	5.34102	6.08672	6.43727	5.32532	5.37447	5.71565	6.52392	5.72086	6.2184	6.82596	7.51899	7.92552
AI450353	4.95262	4.59029	5.18537	4.79207	4.92395	5.37323	4.8465	4.97312	4.55234	4.65234	5.19639	5.3613	5.34056	4.79534	5.63715	6.02007	4.97681	6.20886	5.00459	5.42701	5.42842	4.55278
AI467606	4.15101	5.09148	4.10706	5.09262	4.13865	4.1185	4.09787	4.18446	4.13433	4.1359	5.15427	5.7307	6.65793	5.6271	5.51486	5.70053	6.71902	6.53051	5.94033	5.99435	6.4601	6.13581
AI504432	3.55704	3.54838	3.67651	4.69699	3.81476	4.19984	3.54032	3.90011	3.55167	3.55217	3.54138	4.77475	3.5445	3.53712	5.217	3.54067	4.29087	5.4282	4.50547	4.62128	3.55726	4.51109
AI506816	5.55661	6.34587	6.03609	6.14379	6.30609	5.94308	5.49948	6.17011	6.50839	6.39298	4.93925	5.48546	4.80697	5.2588	6.52972	6.43754	6.59379	6.48455	5.97272	5.86796	6.46528	6.02117
AI597479	7.13754	7.05056	7.80616	6.88713	7.19389	5.90882	6.9625	7.61365	6.50462	7.29918	5.97015	7.54725	7.79716	6.70883	7.90904	7.11596	7.11265	7.30373	7.40415	8.03877	8.19077	6.57406
AI662270	4.03764	3.52008	4.68398	3.51056	3.54523	4.68647	4.06676	3.51934	3.5379	3.54058	3.48006	3.47676	5.19115	3.45413	5.7683	5.1974	6.13184	6.40074	5.24324	7.28364	6.90267	7.08394
AI837181	5.99575	5.76594	6.01982	5.65452	6.01174	5.32563	5.65021	6.33683	6.18245	5.80534	6.81645	6.27024	6.51015	5.36061	6.02372	6.13753	5.51703	5.37322	5.56021	5.41873	5.52579	6.01222
AI846148	5.86921	5.72597	5.7273	5.64963	5.96729	5.6725	5.57764	5.40209	6.42888	5.94657	6.12016	6.45304	5.61638	5.63441	5.33238	5.58868	5.03668	4.91532	5.77736	4.81634	4.84317	4.76171
AI987944	7.41196	7.15994	8.25134	7.37649	7.1814	6.82049	6.73829	7.42503	6.32988	8.47725	8.21981	8.154	6.5691	8.22857	8.40919	9.34739	8.20859	8.70175	7.88949	8.78762	8.56045	7.39929
AK010878	6.57751	6.78603	6.78239	7.06836	7.05438	7.14865	7.15262	6.22551	7.06923	7.03694	6.77658	7.47976	7.22074	7.2337	7.47601	7.08576	6.97658	7.1262	7.25335	7.72255	7.13618	6.66803
AU019823	7.45332	7.49607	7.37133	7.44356	7.79366	7.05367	7.33319	7.89606	7.16191	7.93766	7.42312	7.85921	8.21017	7.7729	7.53011	7.73038	7.70121	7.8618	7.66648	8.4547	8.34265	6.94364
AU021092	6.88774	6.79728	7.34209	6.58457	6.87958	6.20097	6.3618	5.47559	5.17497	6.69071	9.35335	9.97968	9.58252	7.96441	7.92629	7.50284	5.31322	5.97013	6.94016	3.79933	3.93749	3.94702
AU022252	6.63765	6.77141	6.96487	6.92097	6.64074	7.05644	6.87682	6.9965	6.42863	6.83103	6.2177	6.26072	6.35757	6.35615	5.70245	6.53704	6.55254	6.40786	7.00626	6.01784	6.60977	6.58984
AU040320	6.29157	6.90929	6.55022	6.1971	5.76549	6.12931	5.61216	6.17164	5.9648	6.4717	6.68067	6.58343	6.47745	6.16338	6.10865	6.25814	5.8211	5.62479	6.27718	5.99713	5.95109	6.0135
AU041133	6.28564	6.11126	5.80507	5.10259	4.58813	6.21022	4.8866	5.23002	6.83245	6.4586	6.84049	7.33094	5.06239	7.04291	6.95863	7.45696	6.05265	7.50098	5.90304	6.92526	5.83433	6.66228
AW112010	3.29203	3.59139	3.28648	3.28788	3.63497	3.66964	3.64717	3.2885	3.28987	4.2031	3.28579	3.74781	3.28702	4.00785	3.92189	4.12259	3.28594	3.28484	3.88349	3.28879	3.29212	4.0796
AW146154	5.3074	6.22566	6.29305	6.17283	5.3449	6.28815	6.10622	5.49378	5.21836	6.05827	5.59562	6.15317	7.29144	5.9701	7.87017	7.62388	6.51146	7.42992	6.3587	4.89272	6.7293	5.92778
AW209491	6.84408	7.809	7.97241	8.14488	7.56007	8.12542	8.28412	8.02062	6.89346	7.56522	7.02507	8.22156	7.12952	7.6758	7.56714	7.86793	8.09722	7.70662	8.19537	8.2565	7.83411	8.04485
AW549877	7.38619	8.14066	8.7082	8.30751	8.3131	8.7148	8.48735	8.80497	8.6335	9.6871	9.20958	9.67091	9.34661	9.07458	9.52994	8.39862	8.8244	8.96828	8.24507	8.23506	8.14736	6.74201
AW551984	3.39428	3.36375	3.34427	3.97285	4.52467	3.35751	5.28516	4.88897	3.37556	3.37734	6.15462	5.35231	3.4903	5.18083	6.21451	5.92659	3.46728	3.32814	5.27019	3.36586	3.39504	3.39718
AW554918	5.52157	5.46037	5.75964	5.40972	5.99257	5.85745	5.40786	5.98702	4.73423	6.197	5.65967	5.70976	5.31628	5.82083	6.33871	4.98919	5.9611	6.66791	5.77496	6.30569	5.77734	5.59568
Aaas	9.25155	9.22559	9.03672	9.15476	8.75032	8.78539	8.95716	8.57635	8.80944	9.36212	8.3465	8.67234	8.17899	8.8879	8.73302	8.46696	9.27525	8.99109	9.16078	8.73945	8.87143	9.18969
Aacs	7.64199	7.66293	6.75403	6.84751	7.01909	5.0129	7.2779	7.04775	7.5906	6.95287	6.64207	7.0975	6.66207	6.88415	7.21278	7.4979	6.63544	7.06445	6.06021	6.35601	6.48538	6.43743
Aaed1	6.49912	6.39946	6.28017	6.3053	6.69346	6.71012	6.34279	5.99338	6.51187	6.5027	7.14623	7.74796	7.00192	7.06069	6.84688	6.63519	6.59331	6.64412	6.78029	7.27608	6.26544	6.5704
Aagab	7.76426	7.26008	7.92141	6.75057	7.05096	7.08652	7.32491	7.42862	7.15212	7.45926	7.57535	6.90244	6.65467	6.74524	7.69785	7.34664	7.73633	7.75825	7.23396	7.67657	7.84176	8.27425
Aak1	6.64043	7.43443	7.10789	7.32011	6.84736	7.66697	6.81009	7.24323	7.79371	7.21052	7.40946	8.15158	8.46856	8.12516	7.67494	6.53911	6.28516	7.09889	7.19869	6.37436	7.5437	6.85908
Aamdc	7.08138	6.89808	7.58962	7.14317	7.33996	6.42635	6.95169	7.22713	6.98329	6.68612	7.58392	7.17517	7.64082	6.44451	6.86874	7.17248	6.70028	6.61056	6.81818	6.69777	6.73509	7.03033
Aamp	10.3512	10.2252	10.3362	9.83956	9.99263	9.90505	9.93463	10.0636	9.95972	10.1861	10.0673	9.48666	9.46274	9.90511	9.62321	9.69814	10.2348	9.88704	9.96009	9.19316	9.8454	9.85053
Aar2	8.01742	8.1839	7.91127	7.86115	8.15669	6.93382	7.92523	7.89838	7.51755	8.18026	7.96534	6.96157	7.6557	7.60344	7.81576	7.21291	7.79172	7.5683	8.0244	7.46988	7.6283	7.16555
Aard	3.28254	3.59103	3.2766	3.98769	4.24373	4.04872	4.03813	4.03008	3.28022	3.67308	3.70728	3.27563	3.27718	4.07597	3.27735	3.27557	3.27602	3.27484	3.92242	3.27907	3.28263	3.2829
Aars	8.37133	8.83955	7.92536	8.69524	8.52535	7.40929	8.06212	9.09446	9.05782	9.09611	7.57422	7.0962	8.1517	7.82205	8.04425	8.31273	8.88376	8.66937	8.16489	8.1097	7.57462	8.5433
Aars2	5.19842	5.15202	4.92543	4.8774	4.94031	4.68923	4.78312	5.19595	5.32153	4.79433	5.04451	4.80543	5.44231	4.54268	4.52966	5.20615	5.52649	4.51589	4.68581	4.7358	5.2318	4.90512
Aarsd1	8.71168	8.50191	8.48952	8.20057	8.20105	8.37501	8.43573	8.72061	8.97464	8.30254	7.0805	7.91201	7.0709	7.31613	7.51515	8.31449	8.80615	8.56151	8.23249	8.16879	8.45965	8.54422
Aasdh	5.61984	5.65082	5.06596	5.20445	5.67046	5.67393	4.50299	5.2697	5.80811	6.0364	4.50494	5.70968	6.13299	5.27626	5.39405	6.18104	5.44483	5.22985	5.36202	6.49967	4.53367	5.68231
Aasdhppt	8.56365	8.26866	8.85015	8.78215	8.70504	8.91374	8.92611	7.99419	8.51313	8.83173	9.50173	9.13951	9.11462	9.51569	9.09831	9.69395	9.8238	9.77605	9.42623	10.4169	9.20696	8.99233
Aatf	8.18871	8.46135	7.83249	8.58182	8.40916	8.28351	8.01962	7.6746	8.62504	8.1589	7.97567	7.16223	7.5381	7.73791	8.17561	7.38697	8.67492	8.25084	8.26823	8.7207	8.44135	8.65009
Abca1	8.65424	8.81389	9.37731	7.48001	7.90316	7.48027	7.9232	8.42942	8.2897	9.0412	9.29027	9.41229	9.42389	8.14935	7.74473	9.69645	4.29806	6.22127	7.88613	8.84139	10.0069	7.63756
Abca2	3.32158	3.4055	3.83342	3.34004	3.32069	3.87847	3.31793	3.53867	3.32038	3.69383	3.76753	3.33415	3.33784	3.31725	3.31891	3.76517	3.90069	3.77821	3.52645	3.40738	3.37949	4.0078
Abca3	5.57517	5.49595	5.84216	4.36825	4.88063	4.7962	5.02757	5.30069	4.37548	5.27917	5.86777	6.19838	4.82686	5.04798	5.19973	5.20079	4.70634	4.75228	5.17051	5.40589	4.72006	5.89849
Abca4	4.17744	4.4945	4.42108	4.67727	4.59662	3.90822	4.7842	5.03362	4.21169	4.41931	3.90522	4.34348	3.90698	4.3107	4.27501	4.44615	3.92787	4.43141	4.32405	4.24962	4.25939	4.33874
Abca7	4.28778	4.07437	3.81374	3.61493	3.81964	3.66588	3.8518	3.76768	4.28575	4.27941	4.17831	3.8266	3.61404	3.61105	4.24613	3.88511	3.634	4.04578	3.98831	4.28199	3.61934	4.43525
Abcb6	5.30824	6.501	6.5561	5.32785	5.91216	5.47164	5.0866	6.27552	6.12171	5.5345	5.35177	5.2256	5.50552	5.92192	5.57823	5.60561	5.9039	5.79961	5.10275	5.33389	5.75881	5.77045
Abcb7	8.06658	7.2337	8.05718	7.92146	8.15743	8.03942	8.35881	8.5401	8.54771	6.61755	7.98668	8.20615	7.62774	8.94037	8.30483	8.82139	7.89423	8.41006	8.09746	9.3057	8.90361	8.29887
Abcb8	7.57964	6.85929	7.13658	6.73732	6.69698	6.79507	7.20579	7.15292	7.6898	7.16309	7.08702	7.18815	6.16839	6.22566	6.53385	7.02656	7.4726	7.45026	6.67519	6.0385	6.60678	7.08141
Abcb10	5.40707	6.40508	5.81256	5.37917	6.02128	5.33582	6.32654	6.56104	7.01869	6.22042	6.68244	6.42772	5.88564	6.10336	5.98528	5.84768	6.06724	5.50966	5.9878	6.52003	6.00611	6.74216
Abcc1	5.33782	6.69003	6.10425	6.34554	5.99852	5.80843	6.67509	6.84919	5.81256	6.08	6.60344	6.55544	6.43142	6.22452	6.19501	7.08899	7.84593	7.25058	7.55807	6.51324	6.5474	5.63186
Abcc3	3.31862	3.73418	3.7333	3.23084	3.75801	3.23084	3.22801	4.10418	3.86982	4.57064	3.2532	3.75876	3.22987	3.2266	3.23005	3.22817	3.42975	3.2274	3.32197	3.29728	3.98754	3.72431
Abcc4	7.51101	6.68035	6.97808	7.16747	6.67043	6.28981	7.13355	6.79185	6.16523	6.97243	6.54146	6.19027	6.3897	5.33175	5.68593	6.45596	5.17011	5.24836	5.81297	6.37865	5.43571	5.90134
Abcc5	7.30017	7.2567	7.25909	7.41308	6.61886	7.05215	7.06312	7.28699	8.00244	7.19005	6.84908	7.18681	6.50329	7.38934	7.50357	6.88142	6.78373	7.09284	6.91007	6.77733	6.47382	7.5727
Abcc9	5.71021	4.38563	5.15264	4.59604	4.12956	4.64777	5.1918	5.67511	5.31164	5.81959	3.68134	3.68041	4.90915	3.67415	3.68724	3.75652	3.8346	3.67722	3.68103	3.69401	3.7077	3.70872
Abcc10	2.9258	2.92441	3.02463	3.20335	3.13157	2.9645	3.13045	2.92439	3.06217	2.92501	3.2567	3.05676	3.20996	2.98579	3.15841	3.35987	3.19359	3.22431	2.9394	2.9245	3.22021	3.13724
Abcd1	4.53925	4.86999	5.31093	4.99753	4.86593	4.24007	4.23258	4.31402	5.23659	5.33552	4.96002	5.24383	5.59873	4.43065	4.68532	4.44975	5.22757	5.01523	4.55585	4.96494	5.8538	5.71607
Abcd2	6.72211	6.67442	5.62568	6.19167	5.77165	6.61329	6.18841	5.83957	6.25051	5.61234	4.17186	4.16912	4.18709	4.83649	4.18903	6.59635	4.33488	4.15966	4.92806	6.35056	6.7643	7.65211
Abcd3	8.14286	8.33166	7.66328	7.18769	7.37689	6.6445	7.12229	7.25255	7.64291	7.41431	7.91475	7.71803	6.97705	7.63508	6.5825	8.16613	7.30366	7.03741	7.50402	8.05101	8.33835	7.42519
Abcd4	5.07177	6.05945	4.34968	5.03844	4.82006	4.3549	4.8808	5.56164	5.88369	5.20832	5.85389	5.45287	6.01203	4.67824	5.77821	5.00272	5.246	4.65557	4.85102	5.02708	4.80924	5.12902
Abce1	10.5015	10.5774	10.4365	11.1303	10.7543	11.2898	11.3356	10.6442	11.0208	10.9051	10.2269	9.46982	9.50351	10.8958	10.6743	10.6622	11.1093	11.3268	11.2319	11.4306	10.7026	10.8375
Abcf1	8.67415	8.6405	8.56471	9.08835	8.87966	8.05971	9.0461	9.06146	9.58641	9.07343	8.34253	8.46497	8.04063	8.29473	8.46771	8.38245	8.61094	8.44712	8.72201	8.57898	8.46811	8.77625
Abcf2	8.79386	9.25125	9.05364	9.57368	8.97493	9.28005	9.35697	9.11255	9.46604	9.30195	8.47788	8.27678	7.9605	8.73923	8.42615	8.63341	9.35044	9.18298	8.9661	8.93472	8.79391	9.21296
Abcf3	8.27483	8.0001	8.20922	7.64893	7.76359	7.37326	7.96042	7.98266	8.07587	8.00925	8.56637	8.33801	7.713	6.82967	7.79572	7.86092	7.96099	7.43637	7.71346	7.54922	7.73583	7.89047
Abcg1	9.66717	9.14684	9.19933	9.28937	9.45401	10.46	9.489	9.3897	7.11555	8.70863	7.69001	7.89275	8.24545	8.66105	6.60357	8.31256	6.80005	7.21229	7.64607	7.70391	8.41086	7.75114
Abcg2	11.0738	11.1593	11.2424	10.5351	10.2225	10.6289	10.1943	10.7267	9.75173	10.379	10.5377	10.4189	10.2948	11.0953	10.7571	11.348	9.45549	10.355	10.5619	10.1614	9.38493	9.7099
Abhd2	3.54232	4.30246	3.72301	4.02899	3.99336	3.53802	3.94366	4.1388	3.93895	3.54028	4.24837	4.27005	3.53713	3.53415	3.53729	4.36857	3.53602	3.83347	4.0309	3.53896	4.22569	3.58042
Abhd4	8.65573	8.09672	8.61562	6.96598	7.76052	7.3246	7.32041	8.75445	7.94244	8.24949	8.87219	8.86431	9.24688	7.96484	8.38663	8.52275	7.81841	8.21802	7.37663	6.95349	7.18421	7.6882
Abhd5	7.5764	7.95976	7.66368	7.86458	7.63868	8.58952	7.81238	7.53078	7.10333	7.42767	6.42573	7.21721	6.71569	7.45172	7.18033	6.49795	6.92135	6.5043	7.4678	7.35684	7.04737	6.23111
Abhd6	7.16015	7.68851	7.65035	7.63131	7.82574	8.40149	7.15091	7.86346	7.10097	7.53193	7.67031	7.32364	7.77954	8.05733	6.60548	7.3426	6.74773	5.9638	7.16687	5.17229	7.12724	7.15421
Abhd8	5.96491	6.098	5.99494	5.9036	6.07924	5.73315	5.92351	6.21556	5.18132	6.16879	4.75812	4.56131	5.35204	5.19481	5.01158	5.26213	5.52624	6.17631	5.61765	4.99851	5.10119	5.47166
Abhd10	8.07114	8.24146	7.86415	8.10722	8.32591	8.68915	8.22271	7.9497	7.47224	8.48741	7.90674	8.30982	8.58708	8.71996	9.10889	8.14509	8.42074	8.44081	8.63801	8.83471	8.45077	8.75289
Abhd11	6.35436	6.80062	7.50239	7.48692	7.37373	7.79635	6.98466	6.86112	7.49925	7.0804	6.59379	6.67755	6.82312	7.04096	7.18998	6.39686	8.08652	7.71858	7.81351	7.03549	7.48427	7.54813
Abhd12	7.79451	7.27109	7.26341	7.27717	7.5565	7.7092	6.84546	7.30269	7.46827	6.67233	8.03886	7.55644	6.30742	7.13929	7.46207	8.11292	7.30309	7.68585	7.5959	8.22726	9.36579	9.34528
Abhd13	6.8765	6.85695	6.37009	6.56673	7.42161	7.58278	6.45554	6.32804	7.25594	6.98418	7.31392	8.23316	8.09052	7.56104	7.02159	7.21097	7.01083	6.95281	7.06891	7.47973	6.87065	7.0078
Abhd14a	6.59099	7.62354	7.44218	6.98719	7.1613	7.47684	7.06502	7.44348	7.13514	6.29619	7.23294	6.45058	7.30276	6.89438	7.19352	7.45665	7.71218	7.14902	7.22464	7.33513	6.90687	6.97721
Abhd14b	4.75814	4.52071	4.77294	4.18515	4.9658	4.18515	4.25034	5.12751	4.73139	4.71792	5.21254	5.69983	5.38574	4.88959	4.18348	5.29855	4.90273	4.80282	4.80968	4.65505	4.80545	4.64458
Abhd16a	6.99516	7.17385	7.98145	7.58382	7.72153	7.25609	7.14699	7.78474	7.93004	7.5202	8.1321	7.6838	7.56291	6.88779	7.67309	8.08613	8.02108	7.03442	7.26422	7.33906	7.10523	8.30526
Abhd17a	8.61658	8.53455	8.7368	8.48422	8.52865	7.76597	8.34147	8.79436	9.28326	8.12592	9.15113	8.7425	8.79293	8.274	8.31849	8.72313	7.44246	7.4981	7.72458	6.68897	6.83692	6.96932
Abhd17b	6.75001	7.2538	7.36638	6.90876	6.76002	7.14684	7.56142	7.02836	6.95562	7.62019	7.74578	7.7455	6.79639	8.1966	6.96164	7.66136	6.98403	7.91392	7.89216	7.20745	7.12437	6.16985
Abhd17c	5.96493	6.6986	6.34847	6.75836	6.46457	5.75963	6.20218	6.31885	5.86305	6.7007	6.56556	6.86495	6.70963	6.87005	6.54535	6.25569	6.65005	6.68323	6.6055	6.49273	6.5862	6.25876
Abhd18	3.82627	3.77998	4.34413	4.33378	3.78285	4.52908	3.9405	3.7799	3.782	4.88149	4.77087	4.90423	4.26747	3.77317	4.08145	3.82049	4.49248	3.77426	3.77562	4.80617	4.63006	4.57385
Abi1	8.76093	9.27701	9.94558	8.51275	9.20931	9.17093	9.12923	9.22851	7.95296	9.13239	9.53601	10.0423	9.70695	10.1087	10.5605	10.9078	9.01947	9.79424	9.45419	9.76735	10.3062	9.49183
Abi2	7.57425	8.2215	7.94378	7.41122	7.4404	7.37827	7.56807	6.29877	6.42995	6.5233	5.94191	7.84948	7.66093	7.52897	7.26878	7.78674	6.71709	7.69236	7.81011	7.9317	7.43043	7.27343
Abi3	8.04227	8.16766	7.9444	7.2232	8.06002	8.27796	7.92094	8.47279	8.04413	7.8918	8.80406	9.03447	9.05459	7.41215	8.55153	8.63398	7.25121	6.96952	7.33745	6.71577	7.48141	7.75212
Abl1	7.6104	6.87507	7.35383	7.24405	7.27293	7.79207	7.14747	7.73138	7.52671	7.60797	8.07919	8.26787	8.35233	7.44152	7.50275	7.73309	6.84273	7.14672	7.42545	7.11652	7.47515	6.04332
Abl2	7.51904	6.94456	6.69226	7.83143	7.43238	7.75766	8.04737	6.64241	7.76097	6.99358	7.22853	7.64365	7.96257	7.83773	7.28079	6.32581	7.06346	7.11997	7.75292	5.47124	7.41135	6.84398
Ablim1	7.84694	8.15541	8.10379	7.1844	7.82196	7.82903	7.79744	7.97675	7.11822	7.74152	8.83279	8.97483	8.67791	8.74036	8.714	7.73194	6.98967	7.80117	7.25105	4.40237	4.51918	4.52736
Abr	5.13391	5.1745	5.31694	5.90273	5.69936	4.70011	5.38744	5.05176	5.89239	5.1577	6.26171	6.52475	6.58368	5.45742	5.79461	6.0188	5.5	5.98458	5.34453	5.87158	6.09864	6.36017
Abracl	9.07144	8.68858	9.34196	9.27513	9.12614	9.27541	9.34827	9.10603	9.15047	9.4718	9.08699	9.77804	8.7453	9.59327	9.73386	9.46546	9.67661	10.1355	9.39688	9.91044	9.84767	8.99337
Abt1	7.88656	7.46882	7.39672	8.31546	7.74132	8.04186	7.76215	7.40363	7.7684	7.17483	7.95565	7.20962	7.94686	6.62308	7.3922	7.33848	7.3307	7.06887	7.68251	7.78247	7.42675	7.37658
Abtb1	5.41522	5.83946	5.42075	5.62798	5.50073	4.85297	5.13915	5.50591	5.71339	4.85136	5.8088	4.64493	5.4646	5.32233	5.2605	5.41589	5.4546	5.64943	5.11877	5.36777	5.63309	5.67145
Abtb2	3.9214	3.41208	4.22317	3.95021	3.51521	3.38136	3.37874	3.89925	3.79892	3.38366	4.26231	4.17447	3.62635	3.7927	3.97389	4.11846	3.37933	3.37817	3.3791	3.38232	3.38581	3.38608
Acaa1a	8.3417	8.0288	7.62139	7.60825	7.41711	7.86225	7.3059	8.50998	8.28251	7.89464	8.02128	7.97805	7.92872	7.23559	7.97917	7.65627	7.70615	7.6903	7.64646	7.14609	7.97881	8.59236
Acaa2	8.65702	7.96699	8.55611	8.62443	8.91611	8.63041	8.62522	8.83411	8.838	8.43715	8.28783	8.83197	7.72171	8.71982	8.65931	8.33291	9.00227	8.87943	9.05204	9.61048	9.19934	9.65683
Acaca	5.86515	6.57856	6.63156	6.62225	6.67591	6.7221	6.62926	6.14181	6.70303	6.52006	6.58407	6.19208	6.37995	5.94744	6.75265	6.72902	6.20681	6.48023	6.06998	6.57977	5.84717	6.31052
Acacb	3.90477	3.85653	3.93888	4.11494	3.96046	4.14705	3.94225	4.10078	4.14121	4.35048	4.65375	4.02191	4.91425	3.85079	4.09161	3.84789	3.83738	3.89743	3.85173	4.05377	3.93545	3.96806
Acad8	6.96429	7.77701	7.35487	7.27811	7.3468	8.11523	7.39159	7.91425	7.62132	7.4542	7.08892	7.37645	7.74471	6.87128	7.56512	7.84427	7.57222	7.60821	7.49332	7.48899	7.63445	7.74761
Acad9	8.86305	8.44701	8.71682	8.59079	8.22873	8.89919	8.14362	8.82539	8.7003	8.61047	7.02702	7.85208	7.85179	7.76428	8.04313	8.16619	8.46931	8.38571	8.70315	7.67308	8.14411	8.39432
Acad11	5.57589	4.62863	5.03116	5.15374	5.88987	4.46737	5.6172	5.06388	5.1415	5.62411	6.53629	5.766	5.21022	5.95446	6.27418	6.17695	5.02161	5.12169	5.19217	5.91075	4.7711	5.23753
Acad12	2.75958	3.13483	3.15229	2.75812	2.75901	2.83683	2.75725	2.75834	2.85219	2.75889	2.75739	2.75732	2.97322	3.10079	3.17526	3.01407	3.00177	2.85282	3.07544	2.75844	2.75962	3.05644
Acadl	9.43066	8.91836	9.07547	7.85127	8.15779	8.34015	8.08462	8.42884	8.31765	8.51467	8.9816	8.4893	8.59374	8.87182	8.46461	9.10644	8.67325	8.82301	8.27745	8.70835	9.20337	8.95958
Acadm	8.37019	8.20143	8.43369	7.80935	7.83622	8.40838	8.05516	7.96264	6.45583	7.18076	7.83035	8.1033	8.26419	8.24727	8.13538	8.27002	8.325	8.57612	8.51001	8.0353	8.55871	8.57494
Acads	5.48616	5.95134	5.8523	5.32851	5.35915	5.9291	5.64063	6.41421	5.97273	6.24246	6.19377	5.63362	5.63269	5.47395	6.0646	6.31054	6.26144	5.77733	5.55138	6.05833	6.38943	6.34693
Acadsb	7.53229	7.52188	7.36556	6.65513	7.78092	7.49153	7.14464	7.16362	5.02382	7.49934	7.34019	7.74676	7.53585	7.7822	6.02348	6.94668	7.49013	7.24598	7.44474	6.8103	7.00034	7.20152
Acadvl	7.43213	8.10482	7.9732	7.06045	7.31399	6.88917	7.37274	7.32698	7.29374	7.2382	7.17808	7.73113	8.11557	7.88864	7.34039	6.77407	7.9286	7.84895	7.33147	7.15726	7.53072	8.44244
Acap1	4.88155	5.48687	5.36073	4.19546	4.53728	4.34698	4.5411	5.26806	5.85738	5.06238	4.18711	4.18623	4.19203	4.94682	4.48372	5.07344	6.05716	5.29573	4.65409	5.61726	5.99704	5.6062
Acap2	8.16771	8.56348	8.60055	8.27391	8.08903	6.89163	7.93887	8.11452	7.79897	7.72254	7.95983	8.3342	8.3407	8.38356	7.87738	7.75058	7.30244	6.91653	7.1711	7.88104	7.9867	8.13454
Acap3	5.84157	5.35087	5.92568	5.64954	5.40109	5.96089	5.16362	5.74803	6.05208	5.33454	5.25143	5.88237	5.91296	4.97948	5.40463	5.63192	5.17943	5.39753	5.16819	5.21113	5.17707	5.46151
Acat1	9.15999	9.59142	9.19361	8.79174	8.51497	9.22079	8.54835	9.05011	8.44999	9.07612	9.03205	8.71922	8.91324	8.9473	8.41784	9.03689	9.02346	9.19345	8.60395	9.98042	9.78187	9.89967
Acat2	8.90086	9.32868	8.98792	9.22004	9.02804	9.65987	9.74246	9.30886	8.01771	8.82939	8.45834	8.43004	7.56045	9.12084	8.35714	8.90496	8.92343	9.22877	9.13873	7.84096	8.2127	8.11485
Acbd3	7.35994	6.59202	7.39554	7.76032	8.21036	7.13849	7.86187	7.72472	7.95801	6.55122	8.01273	8.68173	8.14076	8.52659	8.32182	7.29517	6.09385	6.55386	7.51994	6.55657	7.28533	6.96593
Acbd5	7.33145	6.91479	6.85863	7.30003	7.0854	8.27815	7.05819	6.40333	6.95239	7.64034	8.16531	7.84569	7.77292	8.77388	7.73647	7.89545	6.75107	8.02865	7.42189	7.96983	7.03891	6.43553
Acbd6	7.43693	7.74205	7.65327	7.43295	7.24954	7.00084	7.60917	7.45184	7.45916	7.46235	7.17192	7.24671	7.57668	7.16292	7.57558	7.56198	8.08883	7.60249	7.0833	7.81091	7.31979	7.79359
Accs	6.25661	6.08862	6.41056	6.1426	5.88431	4.8195	5.94655	6.70055	5.98266	5.77613	6.99457	6.38519	5.93562	6.37227	6.78285	6.72844	6.80911	6.62559	6.19496	5.96237	5.67564	6.68621
Acd	8.33033	8.32176	8.47907	7.68939	8.5692	7.20606	8.00237	8.4913	8.0813	8.04899	8.09658	7.90343	8.41067	7.56617	7.69131	7.96957	8.41025	7.72245	8.02465	7.59569	7.15695	7.81861
Ace	3.79635	3.56716	4.58982	3.51781	3.52535	3.51782	3.60937	3.9578	3.87064	3.8009	5.2527	5.27711	5.47641	4.17448	4.28958	5.14283	3.51199	3.50864	4.37837	3.52052	3.53031	3.53104
Acer2	7.59789	7.59219	8.29812	7.64486	8.1956	6.22776	7.75004	8.10191	6.58805	7.44426	9.78925	9.57697	10.1936	9.14485	9.15733	9.56931	5.43904	6.78874	8.25105	4.4917	5.17252	4.35805
Acer3	7.79711	6.92943	8.65305	7.69974	8.62719	7.26141	7.68468	8.07935	7.94424	8.0241	7.96616	7.95093	7.90552	8.61373	8.75676	9.23681	8.75316	9.16017	8.70073	9.84595	9.45259	9.28275
Acin1	7.88846	7.15763	7.21659	7.75797	7.45403	7.80626	7.61701	8.13186	7.53775	7.47927	7.3721	7.22443	8.04392	7.24295	7.4158	7.25269	7.32249	7.1179	7.38182	7.21494	7.55811	7.55434
Ackr1	4.50552	4.97663	5.11411	4.13391	5.19692	4.72755	5.40791	5.1169	3.86973	5.54113	3.76434	3.76369	3.768	3.75933	3.76847	4.23983	3.76478	4.7955	4.28535	3.77324	3.8913	3.78371
Ackr3	5.80461	5.60314	6.1588	4.05538	5.009	4.0554	4.03856	5.12707	5.74686	4.69533	6.11702	6.01932	6.86539	4.43056	5.55967	5.12578	4.04241	4.03486	4.82812	5.44327	4.08268	4.08427
Acly	9.85397	9.89947	9.8826	9.28403	9.81158	8.31933	9.50027	9.37739	10.041	9.87138	9.18711	9.30226	8.77561	9.23563	8.85511	9.67643	9.76784	9.60462	8.98176	9.17316	9.74333	9.419
Aco1	7.91005	7.85457	8.06603	7.90606	7.80645	7.05199	8.15588	7.97295	8.58667	8.45723	8.04182	7.21596	7.63721	7.76491	7.82778	7.92953	7.17494	7.78712	7.93203	6.62492	7.41231	7.69351
Aco2	10.2088	10.3037	9.99447	9.60973	9.92452	9.67081	9.70244	9.98461	10.4134	9.96409	9.06403	9.08286	9.34868	9.11301	8.66285	9.00725	10.2191	9.47614	9.58	9.50866	9.61184	9.79689
Acot1	3.42653	3.42362	4.07211	3.76632	3.9582	3.42306	3.70657	3.88035	3.42472	3.88006	3.87071	3.88362	3.42234	3.61773	3.64642	3.52993	4.0346	3.99221	4.02297	3.57361	3.42661	3.42682
Acot2	6.9397	7.03016	6.88198	7.13118	6.78339	7.53396	6.73493	7.04632	7.64136	6.87587	6.34571	6.4469	6.7015	7.15776	6.67392	7.38403	7.40505	7.73367	7.081	6.81604	6.95542	6.46468
Acot7	8.12639	8.30952	7.83417	8.3959	8.55263	8.67335	8.45826	8.5961	8.06093	8.33875	7.83513	8.04146	8.1386	8.2354	8.11765	7.74999	8.96316	8.59429	8.5768	7.87345	8.54319	7.95388
Acot8	6.24244	6.59877	5.86178	5.95531	6.01478	6.34323	6.41282	6.47936	6.33355	6.12327	5.55405	5.79651	6.01588	5.58919	5.73493	6.09777	6.39907	6.20721	6.36654	6.02389	6.11564	6.75401
Acot9	9.71838	9.71724	9.90255	9.44889	9.4987	9.40275	9.55494	9.28587	9.15049	9.92605	10.0027	9.75828	9.52874	10.1148	9.56935	9.96434	8.49953	8.08551	9.22996	9.96212	9.12484	9.4497
Acot11	3.22242	3.39253	3.21656	3.38217	3.32691	3.21804	3.21539	3.2187	3.22014	3.25642	3.21584	3.21561	4.16452	3.21408	4.0686	3.8027	4.1529	3.82795	4.21404	3.54054	3.50726	3.57022
Acot13	7.51434	7.37591	7.41595	6.97038	6.79442	7.21258	7.2147	7.75738	6.92022	7.77171	7.12449	7.67593	7.70524	7.35883	7.36327	7.79474	7.60172	7.72176	7.68713	8.27525	8.33174	8.51681
Acox1	7.68805	7.91799	8.23057	7.55346	7.54913	6.8725	7.7797	7.98046	7.05387	7.57555	8.5572	8.8646	8.64174	7.90178	8.4498	8.31802	7.4805	7.83794	7.39855	7.63047	7.30609	7.21759
Acox3	6.00563	5.99558	5.89248	5.54246	5.78455	4.67487	5.05172	5.59249	6.38442	5.59259	6.5405	5.54052	6.75401	5.68109	5.12738	6.28084	5.86672	5.96371	5.21474	5.90577	5.77479	6.23482
Acp1	9.58741	9.46662	9.52971	10.0479	10.0159	10.2935	10.0208	9.18549	9.3748	9.71603	9.20012	9.05894	9.39096	10.1253	9.91207	10.0388	9.80274	9.97605	9.95705	10.278	9.63505	10.0833
Acp2	7.61874	8.13327	7.71033	8.11491	7.30101	7.59969	8.05412	7.40191	8.58256	7.65874	8.16558	8.05478	7.58552	7.5091	7.48561	7.53571	7.08046	7.16198	7.50517	7.27116	7.94036	8.29841
Acp5	4.18225	3.91657	4.32884	3.7024	3.71092	4.37846	4.30398	3.70451	3.70908	3.70975	4.45478	4.91072	3.69949	3.94153	3.70003	4.16578	4.40224	4.72773	4.47922	5.39254	5.44694	6.06205
Acp6	7.07416	7.12799	7.02049	7.39445	7.67875	7.5891	7.37784	6.98959	7.52883	7.41537	7.84887	7.61397	7.07526	8.06765	7.73034	7.10999	7.84277	8.0295	7.94026	7.13192	7.52549	7.83136
Acrbp	3.47816	3.50637	3.64985	3.64406	3.43288	3.31085	3.3088	3.31136	3.71589	3.9065	3.5852	3.50413	4.15576	3.30779	3.75889	3.30892	3.57464	3.71326	3.32941	3.33942	3.81494	3.96768
Acsf2	4.73182	4.64442	5.0932	4.13983	4.37435	4.72883	4.64886	4.68279	4.1653	4.6605	4.83622	4.92146	4.67469	4.09008	4.57149	4.39426	4.33885	4.13393	4.22025	4.07135	4.28326	4.09437
Acsf3	5.3591	6.06071	5.06474	5.26912	5.41639	4.67515	5.72667	5.82948	6.28181	5.80343	6.0753	5.29654	5.75929	5.10624	5.65282	5.12373	6.09439	5.65771	5.43747	5.68468	5.79338	5.91036
Acsl1	5.45064	5.75238	5.60925	5.85104	6.11308	5.7118	5.53318	6.23154	5.52077	5.98579	5.81733	5.46847	5.54518	6.21278	4.82894	6.24471	5.96502	6.35304	5.93787	6.99877	6.44586	6.73993
Acsl3	6.60836	7.35735	7.76373	6.58416	7.16367	7.31211	7.22832	7.15851	7.10701	7.48333	7.42951	7.52978	6.5129	7.31855	6.86733	6.79214	7.03694	7.39255	6.85968	7.62247	6.42173	6.76565
Acsl4	8.70968	8.5426	8.74262	9.01948	8.44081	9.61299	8.55611	8.29799	8.41806	9.08181	8.22869	7.47417	8.09146	9.46539	9.27787	8.81011	8.3098	8.70099	9.08878	9.17596	8.61559	7.72997
Acsl5	9.52306	9.34987	9.18905	9.16373	9.31432	9.3798	9.30277	9.5991	9.13729	9.36317	8.89797	9.02511	6.64607	8.94726	8.70889	7.76857	9.62824	9.08847	9.29801	9.50816	9.27894	9.92907
Acta2	4.10288	4.80935	3.57088	5.08277	8.19493	8.41013	6.3159	5.32603	5.3149	8.91407	8.78938	9.25506	8.61655	9.47525	9.86725	10.1902	10.0053	9.51688	8.97986	11.0718	10.6837	3.96452
Actb	16.0692	16.0914	16.0224	15.9799	15.9258	16.8549	15.8649	15.7789	15.9881	15.7072	15.3047	15.3104	15.1132	15.6171	14.8471	15.3659	15.4052	15.2492	15.4802	15.4167	16.167	16.3296
Actc1	3.31104	3.21951	3.15623	3.19963	4.38338	3.1997	4.74631	3.21798	3.2559	3.26128	7.02793	6.6727	5.4647	5.32058	6.37503	3.24294	7.30497	8.97101	4.65037	9.00921	5.48852	3.96702
Actg1	12.9276	12.7345	12.8491	11.8737	12.0012	11.5801	11.8327	12.4888	12.3286	12.2794	11.7353	11.8919	11.6069	11.3525	11.3075	11.7604	11.8616	11.4026	11.433	11.3097	11.9915	12.1908
Actl6a	10.6769	10.6261	10.4262	11.0188	10.7159	11.156	10.8122	10.6566	10.6324	10.3956	9.68915	10.0277	10.175	10.8812	10.3846	10.0256	10.5077	10.5219	10.7596	9.91924	9.96831	10.133
Actn1	5.58146	5.74399	5.30788	6.06595	5.80597	5.73914	6.1107	5.57224	5.98474	5.32731	5.69355	5.94781	5.75901	6.2656	6.07577	5.91468	5.68525	5.99028	5.9319	5.42973	5.4199	5.33228
Actn4	9.97983	10.0759	10.193	9.42565	9.42234	8.64501	9.21186	10.2943	10.3206	10.0376	9.90704	9.87473	9.58251	8.86869	9.39872	9.77528	9.58981	9.07704	8.37693	8.13025	8.49061	8.81786
Actr1a	9.45417	9.471	9.22477	8.60958	8.78053	8.64775	8.93663	9.321	9.66902	9.5745	8.69743	8.4523	8.70595	8.29723	8.2716	8.58107	9.03095	8.39689	8.4519	8.40958	8.37703	8.79408
Actr1b	8.42961	8.01323	8.43637	8.557	8.20963	7.97892	8.43838	8.55335	8.6388	8.45838	8.44058	8.97238	8.41074	7.17092	7.83087	8.05039	8.7471	7.95683	8.04972	7.41581	7.70833	8.00627
Actr2	11.1935	10.9756	11.3326	11.7499	11.2861	12.266	11.4167	11.0442	10.9209	10.9343	10.4729	10.9553	10.8611	12.0288	11.4011	11.2836	10.8141	11.5196	11.9481	11.4024	11.3232	11.0101
Actr3	11.6291	11.556	11.3069	11.2383	11.1825	11.4425	11.3392	11.1221	10.8993	11.3699	10.9336	11.1531	10.9396	11.728	11.4389	11.757	11.7876	11.8277	11.4867	12.0942	12.2417	11.9273
Actr5	5.1282	4.73856	4.59726	4.31738	5.061	4.90587	4.86854	4.64639	5.61927	4.98865	4.7026	4.51798	5.19933	4.76287	4.65501	4.8	4.85721	4.34418	5.16101	4.40895	4.87903	4.76056
Actr6	7.30897	7.7119	8.0468	8.40079	7.96	8.16551	7.80825	7.29182	8.04326	8.11735	6.83219	8.06174	7.73264	8.83094	8.80847	8.35655	8.63242	9.09801	8.3254	8.46674	8.2069	7.44725
Actr8	8.10396	8.23693	7.98465	8.06082	7.2783	7.28601	8.07309	8.14243	8.2117	7.61957	7.4714	7.99336	6.79735	7.89772	7.90382	7.73901	8.19025	7.93441	8.25118	7.94994	8.0126	7.77782
Actr10	10.0877	9.89532	10.1737	9.62724	9.40622	9.51491	9.32772	9.59274	9.72814	9.92151	9.59437	10.1008	9.70724	9.60431	9.69151	9.51142	9.69513	9.46095	9.3023	9.71465	9.40775	9.28834
Acvr1	6.26257	7.64651	6.96934	6.8895	6.29965	7.24108	6.68449	6.29003	6.77378	6.84296	7.68602	8.03622	8.03375	7.14352	7.46357	7.79862	4.51524	4.70906	5.90568	4.37947	4.80342	4.45139
Acvr2a	6.75201	7.06309	7.30669	6.83043	6.9753	5.89674	6.53155	6.70028	6.94923	7.31752	7.86812	5.53082	6.33553	7.13158	7.57406	6.43568	6.17725	7.10121	6.39189	6.28962	5.4425	5.87081
Acvr2b	7.2684	6.96731	7.40979	7.24151	7.55125	6.85222	6.90202	7.49871	6.94167	7.04998	7.10208	6.7891	7.10251	7.37979	6.79705	6.85805	6.21136	6.67524	7.04692	5.91281	5.61559	5.90981
Acvrl1	8.24701	8.8416	8.34974	7.8375	7.68386	7.48366	8.27304	7.91283	9.11145	7.85298	9.3987	9.23657	8.55399	7.97374	8.10057	8.44953	5.0901	5.6528	7.38618	5.40312	5.90331	6.33222
Acy1	6.5319	6.54205	5.25569	5.8944	6.33541	5.51557	6.5853	5.50692	6.19515	5.1027	5.79082	5.56044	6.00511	5.67907	5.85868	6.06523	6.84496	6.95409	6.34219	6.69696	7.20453	7.60283
Acy3	6.00627	6.2678	4.55257	4.48548	4.73403	5.29875	4.64277	6.10758	5.53917	5.7403	5.41406	4.95482	5.29783	4.82959	4.40869	4.9363	5.27312	5.59297	5.41769	5.20139	5.54741	4.78127
Acyp1	6.78001	6.8638	7.35844	7.19392	6.80986	6.71062	6.81835	6.79243	6.64994	6.63817	7.29486	7.37376	7.73415	7.26847	7.64323	7.67806	7.56542	8.15144	7.9056	8.00397	7.17369	7.43916
Acyp2	5.15279	5.308	5.61054	4.78712	4.96453	5.38877	5.07682	5.43429	5.22931	5.37088	4.70833	4.85578	5.09652	4.87505	5.62657	5.3666	5.05294	5.24495	5.18944	4.94782	4.82498	4.77453
Ada	6.61089	6.64895	7.11572	5.94132	5.76679	4.53295	5.68318	5.95063	6.88759	6.46339	5.19044	5.30827	5.24063	5.4032	5.33484	4.63305	5.95822	5.46463	5.73578	6.46388	6.96778	6.97229
Adal	7.04633	6.58239	7.10307	5.91778	6.69625	6.6338	6.70096	6.69192	6.21767	5.46968	6.54576	7.15781	6.49426	7.26361	6.88709	6.31455	7.53616	7.15919	6.53139	6.44977	6.99557	6.54662
Adam1a	3.43735	3.11912	3.11743	3.41424	3.33099	3.11857	3.15743	3.54038	3.48351	3.12035	3.83676	3.1167	3.74882	3.84587	3.76802	3.93695	3.11699	3.1161	3.30954	3.11931	3.12202	3.12223
Adam9	6.84808	7.73652	7.63161	6.90031	7.05997	7.63408	6.66972	6.82434	6.50755	8.53157	7.38255	6.58002	7.44931	8.2578	9.16922	8.97445	7.92778	7.79141	6.85424	7.66253	8.57622	7.44351
Adam10	10.5302	10.8885	11.0558	10.811	10.6218	11.6597	10.647	10.5342	10.8309	11.0093	11.7147	12.1696	11.9416	11.7496	12.0834	12.0305	11.0293	11.5789	11.0912	11.2178	11.1283	10.1055
Adam12	7.6504	8.03729	7.35948	8.08444	8.43661	7.49514	7.98614	8.00271	7.83197	8.55086	8.00385	8.58054	8.42978	8.2104	8.00545	8.03464	4.24364	5.87527	7.85445	4.80194	4.46764	4.47548
Adam15	9.09932	9.30651	9.6221	8.18798	8.31497	8.16439	8.17627	9.42439	9.01703	9.18946	9.128	9.64591	9.11988	7.60674	8.66526	8.96671	7.17203	7.59926	6.954	6.48628	7.49793	7.99535
Adam17	8.84779	9.24416	9.23226	8.91955	8.98054	9.03628	9.20547	9.35697	9.02725	8.82901	9.22661	8.89348	9.02847	9.24737	8.82678	8.59256	8.2546	7.93715	9.14173	8.9094	9.25966	9.42023
Adam19	7.91955	8.5809	8.13851	7.2756	8.0439	7.56144	7.84167	7.87928	6.98758	7.70005	7.6783	8.29074	7.08352	7.74448	6.33763	8.05565	4.53161	5.47924	6.34532	6.97193	7.58277	6.34424
Adam22	3.75115	3.4808	4.28838	3.67895	3.48285	3.48006	3.55889	3.92735	3.95219	3.54829	3.91656	3.47753	3.62121	4.36569	3.47929	4.43707	4.19086	4.06812	3.92633	3.95384	3.59614	3.48499
Adamts1	7.6666	7.56151	8.43599	7.94876	7.15111	7.93827	7.50977	8.22829	8.75295	8.04738	7.96992	8.18193	8.11868	7.88064	7.33826	7.42048	6.27014	6.81537	6.91277	4.58207	6.17824	5.38234
Adamts3	4.54871	3.80967	3.84159	4.53578	3.81674	3.80708	3.79737	3.80947	3.81465	3.81541	6.09927	5.15788	4.88458	5.31829	3.80438	5.38587	4.73464	3.89048	4.2253	5.20788	5.17066	5.30437
Adamts4	4.76931	5.03278	5.08121	4.04227	4.34554	4.12185	4.16934	5.18918	4.01671	5.42456	4.16651	4.19516	4.58965	4.21096	4.45214	5.11077	3.81384	3.81119	3.81332	3.82064	3.82851	3.8291
Adamts5	3.98791	4.02473	3.95154	5.41076	5.00547	5.44493	5.1408	5.07453	3.97407	6.01272	6.78587	5.11087	6.22127	4.22354	5.25008	6.34645	3.94787	5.24756	5.14709	3.967	3.98848	3.99008
Adamts6	3.38217	3.5755	3.37331	3.37555	4.13044	3.37555	3.71521	3.37655	4.29663	3.77528	3.8162	5.20724	3.66902	3.36953	3.89117	4.18425	3.40087	3.84662	3.63284	4.21589	3.38231	3.56248
Adamts9	6.19504	5.84177	6.25965	5.35636	5.48136	5.62194	4.62009	5.68337	5.18886	5.88733	4.14024	4.22567	4.74071	4.13443	4.39803	4.13927	4.14075	4.1369	4.49755	5.09831	4.44167	4.16298
Adamts10	7.2655	7.03391	7.62932	6.62583	6.08688	6.11836	6.4581	7.80679	7.78057	7.18109	7.99538	7.91206	8.26757	6.19415	7.07799	7.60008	6.60463	6.30602	6.28813	6.18567	6.34777	7.10093
Adamtsl2	4.52554	5.05481	4.92279	4.44295	4.91073	4.09619	4.32097	4.81709	5.21311	3.58689	3.57675	3.79396	3.82998	3.6229	3.58006	3.57609	3.57711	3.72941	3.72189	3.58388	3.59169	3.59228
Adar	5.81498	6.91177	6.82195	6.38804	6.26737	6.02207	6.21786	7.41116	7.31575	5.91223	6.5282	6.7022	7.13201	6.26879	6.60267	5.83394	6.25342	6.07709	5.59679	6.91831	6.85477	6.7986
Adarb1	4.97888	4.54234	5.56828	5.01038	4.92093	5.55366	5.10215	5.30138	4.87891	5.31002	5.19341	4.95383	6.31618	5.28509	5.51249	5.27606	4.37953	4.83147	4.7773	4.27478	4.28593	4.28677
Adat1	5.22839	5.16756	5.81648	4.82294	4.47738	5.46897	5.10724	5.25444	4.73078	5.61548	4.52853	5.37721	4.86084	4.8359	4.39786	4.98383	5.38881	5.28894	5.22724	5.3286	5.00407	4.94404
Adat2	5.33671	5.47192	5.27557	5.67438	5.53485	5.83941	5.19189	5.73126	5.18329	5.71587	5.4743	4.99299	5.47032	5.91521	5.32451	5.32603	5.64024	5.2626	5.56691	5.40339	5.41513	5.63468
Adat3	4.59944	4.94977	4.93052	4.82966	4.86191	4.47685	4.85578	4.69438	5.42412	4.55223	4.44028	4.18729	4.4552	4.72259	4.64544	4.60685	4.83847	4.97513	4.96925	4.36084	4.75744	4.93267
Adck1	7.27938	7.35028	7.02094	7.25169	6.82549	7.48568	7.17852	5.94101	6.08465	7.25538	6.81601	5.85906	6.5289	6.5702	6.71343	7.2208	7.86342	7.19342	7.0312	7.08592	7.04593	7.83185
Adck2	5.06757	4.79359	5.36369	4.92976	4.74199	4.2658	4.98517	4.26781	4.7969	4.50134	5.58479	5.75543	6.19646	4.81086	4.52424	5.43152	5.05623	4.67377	4.80866	4.84275	5.21838	5.34177
Adck3	3.86778	3.61873	3.61609	4.5279	3.6211	3.61787	3.61469	4.19519	4.26375	3.62065	4.57974	4.49104	4.44148	3.61311	3.61697	3.61486	4.15233	4.25316	3.61513	3.90917	4.29197	4.5795
Adck4	4.13352	3.95002	4.53376	4.05581	4.11329	3.94897	4.11961	3.94994	4.69995	4.6656	4.68559	4.48877	3.94763	4.50769	4.67281	4.64985	4.68519	4.80665	4.22816	4.5096	4.67999	4.82984
Adck5	5.9871	5.91267	6.41448	6.40489	6.04837	6.05462	6.55381	6.64067	7.13503	6.80697	6.29892	6.93652	6.95154	5.8228	6.11317	6.16591	6.9511	6.12824	6.63471	6.40601	6.70653	6.53421
Adcy3	3.56354	3.22441	3.88537	3.27644	3.63865	3.22384	3.48156	3.56857	3.31721	3.22569	3.92511	3.93006	4.19584	3.37685	3.27239	3.33841	3.38131	3.32857	3.47625	3.22461	3.33479	3.43249
Adcy4	8.38058	8.25029	8.44399	7.64765	7.93418	7.13782	7.6173	7.95951	8.59667	8.51149	8.4493	9.19584	8.52873	7.4023	8.0565	7.7858	6.03627	4.58718	6.45808	4.25184	4.37381	4.51004
Adcy6	5.77908	5.9193	5.27283	5.56983	6.02658	5.94236	5.20982	5.4107	5.97424	5.47092	6.37185	6.0661	6.52013	5.54966	5.53891	5.59906	4.96161	5.45076	5.24397	4.62927	5.08511	4.96371
Adcy7	3.40655	2.83871	2.79878	3.65872	2.87142	2.82613	3.83267	2.83773	2.86198	2.86544	2.78467	2.78009	2.80954	3.84603	2.81265	3.9439	5.71459	5.96874	4.55258	6.63721	6.44017	6.33464
Adcy9	3.39042	3.7545	3.20074	3.3007	3.41297	3.20143	3.34637	3.67795	3.36327	3.20252	3.2004	3.501	3.60616	3.46296	3.20108	3.20026	3.29712	3.29764	3.592	3.28897	3.61932	3.70632
Add1	9.78494	9.47201	9.72748	9.26005	9.53085	8.53418	9.50047	9.71769	9.74084	9.86334	9.77052	10.1232	9.67822	9.42639	9.66922	9.83367	8.79612	8.7374	9.07193	9.36417	9.24533	9.32516
Add2	5.07605	5.45653	5.58224	4.59704	4.80575	4.42082	4.66163	3.89506	4.42226	4.73545	3.88646	4.20271	3.89036	4.73187	4.45294	4.00515	3.88693	3.88339	4.40348	4.77673	3.90633	5.98432
Add3	8.31281	8.20918	8.84638	8.85229	8.58858	8.22434	9.04651	8.3874	8.72971	8.58921	8.21999	7.57293	7.98654	8.28202	8.31881	7.81458	7.70973	7.5286	8.22724	7.93537	8.82578	8.40461
Adgra2	5.65004	5.04324	6.19506	5.3654	5.6175	5.04023	5.84567	6.09832	5.70915	5.80467	6.42032	5.96161	6.13193	5.19832	5.66697	5.88542	5.05357	5.04536	5.64382	4.59855	4.88209	4.72209
Adgra3	6.74594	7.4753	7.30751	7.61486	7.61435	7.77164	7.64919	7.52549	8.45027	7.37274	8.21729	7.80397	8.1658	7.71686	7.96846	7.90022	7.23519	6.69597	7.57518	6.2598	5.9807	5.62435
Adgre5	8.37645	8.57752	8.89182	6.64013	7.9738	7.04717	7.30207	7.47831	8.28307	7.791	9.14306	9.3945	9.27545	7.71519	8.06055	8.62296	6.93363	7.31963	7.01913	7.34341	8.09265	8.05108
Adgrf5	10.3548	9.99168	10.6319	9.88725	10.2341	9.32813	9.72085	9.73165	9.92579	9.89379	10.7833	10.2609	10.0502	10.245	9.79416	9.76753	7.43089	7.88221	8.76841	4.16447	4.37682	4.3912
Adgrg1	4.64643	5.48985	3.37709	5.85226	5.29072	3.46832	3.29652	4.99624	4.90404	4.9752	7.10833	6.28782	7.08846	7.22226	8.68848	7.75575	10.4452	10.1314	8.41514	8.78065	9.42936	8.08855
Adgrg3	8.76672	8.80761	8.96157	8.90652	8.97526	8.79619	8.66971	9.32008	8.61216	9.25247	4.03938	5.41944	4.10981	6.12387	6.93878	7.03642	8.85651	7.31357	7.73565	7.7156	7.8156	5.88793
Adgrg6	4.9649	6.50255	5.83392	5.28151	5.88133	5.86002	6.26862	5.98395	5.90028	6.27102	9.0322	8.41178	8.5043	7.00687	7.75728	8.72483	4.77651	3.65887	6.64388	3.80928	3.91332	3.92061
Adgrl1	6.15542	5.84694	6.60675	6.06261	5.88137	5.99885	5.9815	5.78695	5.80361	6.60694	6.75253	6.93245	6.96549	6.27725	6.43222	6.19971	5.22485	6.0694	5.76019	5.31044	4.8046	5.29446
Adgrl2	8.30032	8.14633	8.16668	8.16718	8.54155	8.13604	7.97613	8.09986	7.93198	7.89306	8.21502	7.68333	6.83697	7.74068	7.34523	7.56783	6.94901	6.64049	6.88565	6.81101	7.08539	6.89619
Adgrl4	10.7208	10.9209	10.616	10.1558	9.77055	10.3817	10.3476	10.4814	10.3279	10.399	10.8569	11.2544	10.109	10.9521	10.1512	11.2872	9.67653	10.8038	9.94445	6.06007	10.237	5.55844
Adh1	3.37	4.60638	3.35412	4.07149	3.47328	3.9504	3.79996	3.35999	3.90139	3.90803	5.08102	4.46689	5.17989	4.13176	3.35615	3.35129	3.35254	3.34929	3.96394	3.71981	3.37025	3.37096
Adh5	9.97218	9.98969	9.95467	10.0981	9.9796	10.2606	9.89699	10.0204	10.1649	9.9589	9.96962	9.22572	9.45612	9.88141	9.81469	9.6284	10.156	10.0495	10.0986	10.2299	9.79686	9.83065
Adi1	7.73285	8.47616	8.42406	8.27962	7.66625	8.14699	8.31432	8.20565	8.34514	8.24921	8.77317	8.0542	8.23433	8.90168	8.58747	8.39502	8.97915	9.56885	8.84109	10.0291	8.83694	9.01856
Adipor1	9.8542	9.64307	10.1354	9.30866	9.45588	8.83456	9.5512	9.73264	9.49011	9.39372	9.75516	9.7599	9.67659	9.66717	9.0257	9.49782	9.19985	9.55536	9.07832	9.26884	9.24798	9.33312
Adipor2	6.10435	7.37208	7.65197	7.12124	6.90054	6.93292	6.92407	6.60218	7.51319	6.77724	8.5419	8.50047	8.08879	8.00232	8.0567	8.11745	7.39751	7.83486	7.93922	6.30875	8.10929	7.4398
Adk	8.52337	8.00963	8.51419	9.64729	9.46749	9.22697	9.30026	8.91273	8.88316	9.24347	8.00134	8.62017	8.31625	9.35798	9.10628	9.21334	9.22678	9.3607	9.96579	10.5536	9.81159	9.93785
Adm	6.94601	6.45055	6.97956	5.14114	6.05402	6.82633	6.48777	5.96921	4.3738	6.28232	6.02607	5.38196	5.41451	5.18962	4.01234	3.99429	4.05591	4.39296	3.99656	4.02926	4.06263	4.06509
Adnp2	5.60202	6.11922	5.85086	5.58236	5.63398	4.51	5.73639	5.47915	5.20015	5.03413	5.54533	4.50076	5.50581	4.76071	5.1827	6.14499	5.70493	5.78341	5.49441	5.1363	4.62401	5.7177
Ado	9.21958	9.11014	8.99831	10.1801	9.47739	10.8644	9.63633	8.76293	9.97137	9.78248	9.13465	9.08428	9.09353	10.2252	10.3656	10.0188	9.79846	10.2556	10.0818	9.3033	8.79204	8.81349
Adora2a	6.69623	6.29565	6.33161	5.71394	5.81669	5.12863	5.89422	6.07403	5.9955	6.44593	6.90403	6.06671	6.60267	5.17214	6.33894	6.60196	5.34989	4.9302	4.67036	4.50731	4.53258	4.7793
Adpgk	9.14788	8.63342	8.68543	8.815	8.77751	8.52094	8.68182	8.84135	9.1387	9.3397	8.4846	7.82327	8.63794	9.21978	9.23479	9.46687	9.12192	9.54699	8.59861	9.31272	8.63443	8.18304
Adprh	9.79012	9.46295	9.51444	9.19366	9.23936	9.10088	9.50996	9.13707	9.3706	9.46295	9.1236	8.90643	9.09259	9.20047	9.13615	9.39519	9.52248	8.81877	9.06707	9.26635	9.24287	9.57952
Adprhl2	6.88951	7.01173	6.85216	6.25405	5.94574	5.42032	6.561	6.77045	7.23487	6.55116	7.11098	6.74828	7.21993	6.07658	6.45198	6.05372	7.14709	7.21576	6.27033	6.33072	6.54041	6.75851
Adprm	7.25833	6.57557	6.69494	7.05003	6.94134	6.90986	6.25757	6.81499	6.76298	7.33351	6.56657	7.23967	6.44363	6.77605	7.65749	7.33589	6.99983	7.5804	6.79808	6.7592	7.22711	7.03441
Adrb2	4.53358	4.17053	4.14293	5.78839	5.10748	5.52406	6.19699	4.16984	4.18724	4.18976	7.32985	6.80768	7.0059	6.60824	5.88445	6.23236	4.13554	5.93534	5.6839	7.07768	7.25969	6.19132
Adrbk1	7.49751	7.53145	7.58449	7.68306	7.51201	6.35551	7.60033	8.02828	7.86809	7.25833	7.64184	8.01874	7.74856	7.19788	7.61065	7.83655	8.20045	8.29558	7.42059	7.78565	8.23152	8.41561
Adrm1	8.76738	8.68226	8.83655	9.0007	8.81672	8.64973	9.06321	8.92306	9.01999	8.71135	8.61543	8.15907	8.48896	8.27421	7.96905	8.39931	8.78604	8.39599	8.85164	8.05754	8.12365	8.20816
Adsl	10.0017	9.65133	9.25705	10.3316	10.0584	10.2565	10.4014	9.83127	10.3109	9.85535	8.30573	8.76883	9.23154	9.21311	9.35567	9.17194	10.3311	10.1415	10.5034	9.89514	9.92957	10.2646
Adss	10.2587	9.98876	9.76708	10.1706	9.88981	10.6482	10.2131	9.81818	9.48383	9.90835	10.0004	9.75907	9.90995	10.701	10.2297	10.2167	10.1805	10.5431	10.3388	10.2106	9.68422	9.32597
Adssl1	3.50772	3.49765	3.49151	3.49565	3.50308	4.40502	3.48822	3.49749	3.50147	4.29301	3.48947	3.48882	3.49311	3.48447	4.31747	4.30281	5.10878	4.82656	3.86281	5.40425	5.12176	5.10328
Aebp1	4.09057	3.77715	4.74858	3.85669	3.71447	4.10993	4.167	4.30743	4.76414	3.74183	3.91086	3.97779	3.99936	4.10803	3.82097	3.78624	3.67511	3.6057	4.18525	3.67159	3.76357	3.61525
Aebp2	6.62998	6.4554	6.75033	6.99927	7.17577	7.57769	6.43208	6.53344	6.92158	7.09073	7.37334	6.33031	7.41589	7.48468	7.33605	6.67471	7.15548	7.36167	7.44778	7.43374	6.66236	6.89429
Aen	7.34142	7.53936	6.31337	7.39345	7.56063	7.15712	7.55591	7.10533	6.89835	6.95565	6.41054	6.49321	6.00121	6.22526	6.94142	6.36462	7.54292	7.06222	7.53858	6.29447	6.3598	6.85328
Aes	5.71089	6.01043	6.49938	5.28311	5.83617	5.5155	5.61203	5.97304	5.51308	6.00383	7.80609	7.58758	7.0774	6.64615	7.29635	7.3089	7.40111	7.34274	6.84889	6.65254	7.46546	7.54814
Afap1	6.25804	6.10147	6.16286	5.0809	6.1193	5.86404	4.92207	5.87389	6.81577	6.75713	6.53702	5.94105	6.48962	5.70352	5.74667	6.18035	4.69948	4.94021	5.16414	5.24218	4.62607	4.93495
Afap1l1	9.28386	9.33181	8.94377	9.15913	8.94545	8.46882	9.33385	9.43302	9.48762	9.22447	9.49131	8.49098	9.28283	8.93316	9.40179	9.51489	8.70216	8.66714	8.7752	5.91327	6.23417	6.15155
Aff1	4.3401	4.07784	4.3431	4.31427	4.73913	4.07652	4.42662	4.07773	4.08038	4.8707	5.27003	5.3198	5.20042	4.83922	4.45856	4.66185	4.14386	4.41994	4.83687	5.15905	4.89039	5.09786
Aff4	7.66865	7.82432	8.21002	8.19098	8.64754	7.44377	7.93245	8.38171	8.55604	7.43758	9.43517	9.7007	9.63776	9.20129	8.96098	8.59487	8.20792	7.92862	8.88653	6.84673	8.04353	7.11029
Afg3l1	6.91028	7.57269	7.01633	7.09868	7.14376	7.10556	7.58739	7.54468	7.87362	7.54211	6.06961	7.15459	6.91481	7.21326	7.10421	7.28471	7.53473	7.01615	7.17124	7.04071	6.98212	7.45324
Afg3l2	7.66917	7.38934	7.93734	6.95133	6.90614	7.18727	7.7848	7.44537	8.42569	7.36943	7.45065	8.11356	7.44731	6.83184	7.20673	6.79655	7.88154	7.75068	6.9918	7.99535	7.83235	7.90025
Afmid	3.03918	3.29537	3.28446	3.3882	3.10082	3.03632	3.11011	3.88349	3.03769	3.64965	3.03489	3.03475	3.31465	3.05027	3.61441	3.1115	3.54686	3.03424	3.14999	3.48161	3.2345	3.17705
Aftph	6.77544	7.15435	6.96583	6.89072	6.92397	7.92377	7.54677	6.99961	6.02792	6.70708	6.23177	7.69528	6.73057	7.39303	7.55069	7.56116	7.54863	7.17715	7.35718	7.38043	7.69127	6.689
Aga	7.32964	6.95299	7.36903	6.95095	6.99156	7.30306	6.70159	6.75574	6.15136	6.56672	7.75591	7.99692	7.8835	7.23641	7.11644	7.19331	7.42061	6.99959	6.76204	8.01286	7.92811	7.4217
Agap1	5.17545	5.42477	5.96938	5.36236	5.70741	4.61431	5.99105	5.47305	5.35849	5.56798	5.63581	5.06167	5.50933	5.57101	5.95737	5.82599	5.37666	4.87472	5.46035	5.00076	5.05429	4.73812
Agap3	6.56162	6.95475	7.08667	6.72985	7.238	5.98586	6.73901	7.19224	7.9591	6.95591	7.09145	6.13497	6.96534	6.16364	6.6307	7.06791	6.57979	6.59658	5.82642	5.67571	6.27672	5.79767
Agbl3	4.14458	3.72973	3.71386	3.52376	3.87056	3.52376	4.02996	3.98998	3.52653	3.52681	4.47415	4.14802	3.52256	3.51852	3.52278	4.826	3.52105	4.47633	3.52074	4.20114	4.08254	4.27327
Agbl5	5.06321	4.99231	4.62539	4.78068	4.73758	4.23971	4.23365	5.611	4.50297	5.04666	5.11196	5.63735	5.11332	4.87617	4.84265	4.62085	5.36781	5.02646	4.97126	4.62324	4.54677	4.5195
Ager	3.25667	3.25182	3.24891	3.25087	3.93908	4.00562	3.45427	3.55295	4.17212	3.40571	3.54431	4.00944	4.98323	3.32973	3.77462	3.24755	3.42422	3.47835	3.27491	3.60934	3.25679	3.47208
Agfg1	8.05975	8.30264	7.86455	8.72744	8.65868	8.74911	8.6662	7.76481	7.87138	8.39746	8.1515	8.86985	8.85219	9.26018	8.77494	9.5411	6.94804	7.95411	8.63132	7.93063	8.37822	7.22758
Agfg2	4.76269	4.08613	4.46362	3.96802	4.07559	3.96803	4.19575	4.11211	4.43836	3.97171	4.60059	4.87736	4.34731	4.2959	4.50769	4.88063	5.04068	5.05601	4.57468	4.49377	4.38819	4.67202
Aggf1	7.6981	8.53734	7.67588	7.62754	8.07805	8.04648	8.74268	8.34053	9.12262	8.12885	8.1652	7.66895	7.81386	8.70509	8.62714	8.49674	8.21632	8.49951	7.98999	7.73542	8.21689	7.98985
Agk	8.48872	8.28906	8.08147	8.00562	8.24962	8.45069	7.9089	7.48729	7.88312	7.54366	6.75323	6.17648	6.89171	7.34867	6.73268	7.23492	7.95039	7.45122	7.85718	7.73703	7.52235	7.84801
Agl	5.9231	4.71925	5.67076	5.52249	4.87285	4.99347	5.0467	5.90895	6.19194	5.5434	6.3131	6.41702	6.44483	6.57233	5.50889	6.34007	5.78734	5.20058	4.7894	6.23346	5.52087	6.07051
Ago1	6.84615	5.75314	6.66344	6.43889	7.04098	5.35902	6.85336	7.24972	6.03028	7.23122	6.93649	6.83776	6.44846	6.76846	7.14105	6.31993	5.66591	6.05181	6.56962	6.46927	6.34504	6.73444
Ago2	7.17567	6.55045	7.21296	6.50857	6.93014	6.69446	6.96637	7.40794	5.75612	6.91351	7.18159	7.40571	7.2727	7.16498	7.21456	7.13292	6.12779	6.25602	6.85713	6.7926	6.58207	6.93036
Ago3	5.16414	4.90475	5.35106	4.90063	5.36859	4.47871	5.01522	5.87785	4.9513	5.02625	5.89394	5.7498	6.00156	5.37453	4.47155	4.69036	4.94256	5.69895	5.06264	6.2254	5.2702	4.95376
Agpat1	6.60263	5.94776	6.2793	6.06826	6.08195	6.16965	6.06762	5.54778	6.57337	6.63939	6.12047	7.15129	6.25428	6.18489	6.18242	6.24308	6.26831	5.98645	5.85879	5.72598	5.65855	6.03649
Agpat2	5.82111	6.33066	5.83949	5.80828	5.91421	5.26092	5.37969	6.49049	6.09429	6.02494	6.98037	6.51408	6.11169	5.9519	5.75159	5.72598	6.28353	5.54241	5.85088	5.74	5.87627	6.16167
Agpat3	5.87925	6.25506	5.57001	5.54902	5.27068	4.53492	5.58238	5.51369	6.17521	5.36486	5.85758	6.61276	5.80981	5.69941	6.8773	6.2319	4.68846	5.43391	5.8822	4.91794	5.14647	4.98565
Agpat4	7.45847	7.34245	7.03034	6.77369	7.17653	6.89549	6.58247	7.46968	7.49749	7.12229	7.5397	7.24094	7.33646	6.76875	6.48132	7.1724	6.10613	6.76584	6.60386	6.25511	5.91276	6.32343
Agpat5	7.52006	7.77209	8.37826	8.69467	8.11114	8.97986	8.48221	8.70332	7.67669	8.95136	8.46496	7.823	8.39046	8.46043	9.0189	9.12004	9.38241	9.22913	9.27303	10.163	9.4875	9.22979
Agps	8.39817	8.12833	7.95376	8.47493	8.6225	8.39716	8.45444	8.1228	7.76067	8.48404	8.60463	8.82934	8.42996	9.69304	8.85074	8.21784	7.89727	8.88512	9.09321	9.56271	9.30693	8.63588
Agr2	3.12632	4.74739	4.84159	3.08033	3.10919	3.08036	3.04954	4.62477	4.80142	3.10533	6.07812	6.12357	6.00196	3.03317	5.40482	4.53627	3.05674	3.04256	3.05395	3.09093	3.12726	3.12989
Agrn	8.57628	8.7445	9.07791	8.01292	8.07549	7.40497	7.57839	8.51638	8.59963	8.07446	10.5322	10.1638	10.2784	8.84006	9.52033	8.88873	6.97604	7.53584	8.03602	6.73355	7.14899	4.9966
Agtpbp1	6.17226	6.14303	5.8968	5.8791	5.90149	5.79535	5.83805	4.94537	5.84572	4.91617	5.00916	5.96064	4.65166	6.1196	5.31938	5.34759	6.14575	5.92616	5.7213	6.47326	5.83982	6.40925
Agtrap	5.61025	5.61287	6.10952	5.67809	5.60095	5.98188	5.7847	6.25756	5.43587	5.96219	5.38063	5.73334	5.30942	5.41604	5.74958	6.00418	6.3671	6.12066	5.96014	6.30159	6.57208	6.95658
Ahctf1	9.30913	8.92855	9.69195	8.96036	9.3973	9.12117	9.61595	9.05565	8.90906	9.08248	8.77167	9.2338	9.00097	9.74163	9.54716	9.14482	9.30385	9.37405	9.36755	10.2511	8.72959	9.52526
Ahcy	7.4362	6.94076	7.27866	7.90755	7.70492	7.5819	7.41681	7.41156	7.80844	7.69781	6.75444	6.78736	6.34352	7.29985	7.27109	7.25734	8.60222	7.97201	7.72007	7.9936	7.8468	8.00131
Ahcyl1	7.88121	7.84575	8.34925	8.33964	7.80547	7.82433	8.53867	9.04238	8.82124	8.81575	8.73212	8.66241	8.63951	9.27411	9.01233	8.48597	8.51985	8.00127	8.83517	8.81921	7.73531	7.2231
Ahcyl2	5.38215	4.69206	4.73866	5.67292	5.40695	5.63668	5.7257	4.71826	5.81693	4.89036	4.75809	5.25994	5.5597	4.46113	5.90113	5.45781	4.72297	5.36918	4.94578	6.2567	5.21428	5.64126
Ahdc1	4.39178	3.90491	3.67057	3.76854	3.95755	3.58825	3.88131	3.63907	3.86981	3.79432	3.83432	3.94655	3.66092	3.6573	3.92116	4.04776	3.61011	3.7398	3.83193	3.74917	3.58792	3.6813
Ahi1	6.25583	5.97779	6.21422	5.33425	5.31088	5.25059	6.38049	6.60876	5.78269	6.14961	5.24232	5.43139	5.71305	5.21765	6.35422	4.68948	5.86159	6.28684	6.61788	6.80898	5.0518	6.0311
Ahnak	6.79634	7.3387	7.73659	6.94084	7.36628	7.50646	7.30837	6.84132	5.47423	6.26553	8.08373	7.94401	7.59935	8.59441	7.50798	7.50751	4.52399	5.91305	7.68682	5.87479	7.05593	5.91068
Ahr	6.27393	6.70207	6.63223	5.96439	6.79431	6.29892	6.00988	6.1513	4.84115	6.40972	7.77776	7.44044	7.01904	6.53363	6.56131	7.03362	5.91182	5.44482	6.2963	5.52641	4.88886	5.40318
Ahsa1	10.1831	9.81323	9.62144	10.2851	10.1167	10.2799	10.2981	10.0446	10.0215	9.76082	9.32365	9.06202	9.24011	9.61792	9.46766	9.50354	10.5399	10.263	10.2528	9.9698	9.61104	10.2078
Ahsa2	8.02486	8.10641	8.28657	8.53348	8.4203	8.31987	8.58422	7.60147	8.37428	8.2367	8.06553	8.20513	8.39595	8.29787	8.47539	8.43719	8.13702	8.2362	8.43889	7.69641	7.33551	7.38532
Aida	6.52093	6.98085	7.7034	7.67915	7.39917	7.78727	7.36358	7.49995	8.29364	7.51752	7.59033	6.99546	6.81673	7.74569	7.84302	8.00404	6.49615	7.10805	6.69377	6.92016	7.36831	6.92268
Aif1l	6.1976	7.06341	7.04828	6.37464	6.06325	6.20597	5.65184	4.64149	6.97764	5.92957	6.55185	7.04614	6.04148	6.2431	6.2358	5.25395	5.40857	5.90026	6.38183	5.52834	4.61823	4.62042
Aifm1	8.91038	9.34755	8.7603	9.27398	8.57082	9.31049	8.93384	7.9128	8.64102	8.71035	8.46365	8.75281	6.61674	9.19802	8.92821	8.35437	9.07331	8.97613	9.03865	9.17973	8.58926	8.81641
Aifm2	3.96902	4.65338	3.43677	3.43838	3.47727	3.43839	3.64941	3.96779	4.14548	3.82847	3.43597	3.43572	4.1106	3.43405	3.51613	3.6355	3.6985	3.55097	3.89916	4.15641	3.72059	4.24182
Aig1	4.83681	5.36254	5.54376	4.89755	4.9321	5.33465	4.76149	5.02531	4.70185	5.29156	5.39123	6.27988	4.98804	5.11189	5.35364	5.11394	4.78507	4.73847	4.72623	5.06986	4.86573	4.99545
Aim2	4.84276	4.6767	4.98291	4.19653	4.6066	5.17924	4.37092	4.49935	4.20318	5.01677	4.6644	5.5412	5.60222	4.18382	4.29516	5.52296	4.98706	4.68095	5.20326	5.41254	5.9582	5.76778
Aimp1	9.15557	9.07661	9.05286	9.53639	9.4184	9.59249	9.3421	9.38293	9.46587	9.3546	8.83883	8.9741	8.69948	9.23693	9.32426	9.21021	9.62446	9.12558	9.47635	9.54988	9.1778	9.48905
Aimp2	8.76788	8.92983	8.94749	9.77872	9.53669	9.2758	9.65346	9.24636	9.3918	8.87783	7.64494	7.97732	8.30787	9.02931	8.16579	8.57039	9.64624	8.74914	9.80458	8.97472	8.50265	9.08058
Aip	8.55855	8.51751	8.78684	8.24594	8.44904	9.03318	8.76225	8.43866	6.52117	8.02561	8.46719	8.2161	8.49776	8.29823	8.06557	7.61671	8.43804	8.1915	8.76	7.42028	7.68338	8.43962
Airn	6.7252	6.51258	6.86959	6.42401	6.57302	5.98995	6.11078	6.51652	5.27566	6.46297	6.91036	7.37903	7.3531	6.15845	7.00031	6.98122	4.63394	5.57085	5.39599	5.37416	5.66664	4.65651
Ajuba	6.59854	7.41687	6.29435	6.50861	6.9961	6.9472	6.87582	7.34819	7.00611	7.11262	7.91791	7.23739	7.28797	7.05313	6.89351	7.51312	5.60872	6.62092	6.54061	5.07615	4.72351	4.72723
Ak1	4.67478	5.9092	5.36775	4.83443	5.2712	6.04828	5.32074	5.18281	6.12274	4.57481	5.38098	4.63559	6.06342	5.10591	5.84493	5.05463	5.26584	5.46196	5.08006	4.7103	5.58325	4.46865
Ak2	9.2782	9.52121	8.64474	9.7039	9.56426	9.64906	9.54809	9.3791	9.79128	9.42926	8.72257	7.95263	8.01997	9.10534	9.085	8.85487	9.71498	9.59347	9.45849	9.45724	9.62066	9.7188
Ak3	8.31987	7.8778	8.6443	7.303	7.6734	6.90872	7.90246	7.85653	7.5875	8.53017	8.63048	7.72499	7.91558	8.7229	8.70262	8.61326	8.63859	9.26624	8.21771	9.75315	8.98787	8.58901
Ak4	4.8091	5.01246	6.03807	5.62386	5.92451	5.85154	5.52323	4.7377	5.67271	5.32444	4.05441	4.64937	4.05959	4.7698	4.06026	4.08755	4.24974	4.48548	4.50739	4.83214	4.13995	4.14189
Ak6	8.82584	8.94697	8.78535	9.28949	9.33435	9.31621	9.15687	8.86286	8.53	9.0002	7.16702	8.49821	8.26973	9.66949	9.3559	9.63856	9.22455	9.78251	8.99389	10.0857	9.67336	9.21334
Akap1	6.59036	6.90726	6.35763	6.3208	6.06633	6.93037	6.73414	6.322	5.91399	6.45819	6.7297	5.81907	6.64095	4.98299	4.98578	6.79698	6.27944	5.79049	6.04573	5.73652	6.42942	6.12583
Akap5	4.60109	4.42514	5.331	6.1585	5.48434	6.29292	6.32638	4.42463	4.50332	4.43945	6.1249	5.9534	6.5796	6.56976	6.16845	6.61707	6.26438	7.48049	6.86606	5.6553	5.23991	6.08214
Akap7	5.89493	5.99904	6.10735	5.32286	5.71778	5.55228	5.49903	4.97892	5.33583	5.30165	6.63953	6.61982	5.97272	5.54294	5.27143	6.04035	5.57205	5.60391	5.14798	5.60327	5.60482	5.49855
Akap8	8.35769	8.98437	8.70978	9.36621	9.01271	8.90311	9.1876	8.96614	9.54116	8.86627	8.40182	9.51157	8.82591	9.35373	9.31892	9.6142	9.09857	9.47346	9.07349	9.46786	9.35627	9.55419
Akap8l	7.5198	6.96949	6.9574	6.69181	6.59756	6.81176	6.96981	7.64472	7.66129	7.56852	7.33368	7.25196	7.46905	7.35	7.12125	7.51288	7.6918	6.67617	5.96632	6.4827	6.96108	7.99758
Akap9	8.0781	8.55543	8.60635	8.36398	8.56538	8.21773	8.41628	8.82453	8.53576	8.18802	9.25972	9.27696	9.26213	8.86728	9.30668	8.73619	8.19811	8.10519	8.4329	8.59202	8.02084	8.40249
Akap10	7.15627	7.49037	7.18676	6.85264	7.08117	7.7522	7.12147	6.3426	7.11655	7.4313	7.26844	6.7517	7.16773	6.90641	7.97323	7.39207	7.6459	7.41997	7.30141	7.64224	7.54461	7.6806
Akap11	6.83122	6.72796	7.92689	6.84917	7.2261	6.26503	7.1682	7.0828	6.81192	7.05181	7.52455	7.76337	6.58604	7.51026	6.18267	7.05763	5.72535	6.51183	7.36451	7.17522	5.84854	4.91299
Akap12	8.65116	8.52648	8.95359	8.97082	9.0531	9.32648	9.16071	8.9329	9.3677	9.26737	8.12852	8.47404	7.97591	8.92087	6.65325	8.08886	4.29698	4.2987	7.43095	6.64091	7.28123	5.12421
Akap13	8.36735	8.28704	8.35296	8.11676	8.01018	8.08896	8.25148	8.43521	7.37863	8.06841	8.19239	8.1569	8.0401	8.02846	7.91427	8.03731	8.32144	8.48834	8.52555	8.86245	9.50243	9.07036
Akap17b	3.73325	4.62823	4.02132	4.41643	4.58897	5.00546	4.88295	4.27295	4.73082	4.5298	3.72279	4.13997	3.95335	3.99454	4.1539	3.72232	3.77379	3.90311	4.20385	3.72783	3.7334	3.73382
Akip1	7.71402	7.54313	7.52116	7.57296	7.65232	7.66458	7.58126	8.02806	7.45023	7.23415	7.17334	7.66171	6.74441	6.92714	7.48195	6.73546	7.61368	7.59537	7.57507	8.06604	8.2973	8.2974
Akirin1	8.57269	8.62489	8.15188	8.5401	8.05539	7.56666	8.75794	8.15855	8.65002	8.54587	8.70656	8.65202	8.56077	8.02924	8.38289	8.81552	8.40792	8.75926	8.41626	8.68005	9.18035	8.48245
Akirin2	7.45097	7.83	7.54514	7.27261	7.46686	6.92241	7.45281	7.28756	7.65174	7.51818	8.45134	8.67633	8.62272	8.41229	8.28288	8.07746	7.66637	8.01625	7.58502	7.55604	7.7988	7.44895
Akna	4.74264	5.42227	5.21732	4.52915	4.89999	4.82647	5.29127	4.88966	4.65927	5.39191	5.45388	5.26242	4.91157	4.86143	4.56479	4.80727	4.57604	5.25671	4.58981	4.90108	5.94783	6.23099
Akr1a1	11.9951	12.1791	12.0052	11.4637	11.8943	11.777	11.7811	12.0248	11.4703	11.7661	12.0607	11.8984	11.9106	11.5654	11.3443	11.3752	11.397	11.1272	11.5944	11.2534	11.9428	11.9357
Akr1b10	5.51238	5.79222	5.6917	4.98482	5.91734	4.72414	5.2876	6.09631	5.96721	5.70866	5.95775	5.72606	5.861	5.42365	5.83867	5.80351	6.92571	6.81814	5.93373	6.42861	7.10613	6.98388
Akr1c12	3.49048	4.14358	3.8937	3.56879	3.80256	3.56881	3.7005	3.91219	3.92376	3.48925	3.48659	3.78052	3.48735	3.93938	3.48745	3.71695	3.90586	3.99945	4.1893	3.48845	3.72894	3.4907
Akr1c13	5.41073	4.89336	4.49132	4.55517	4.70679	4.22311	4.43818	4.99153	5.15025	4.72113	4.21627	5.38548	5.06678	5.07892	4.74289	4.98521	5.75687	5.18071	5.91031	4.43862	5.95689	4.57742
Akr1c14	6.57018	6.33895	6.59207	5.04064	6.07146	6.02572	4.8691	3.26111	3.51251	3.34819	8.46974	9.49713	10.0334	9.45719	10.1251	7.94071	3.09219	7.17152	7.64571	3.27772	3.44888	3.46047
Akr1e1	5.86093	6.17336	5.76697	4.94359	4.93872	5.42036	5.29959	6.80703	6.74799	6.25575	4.4133	4.892	5.58025	5.48062	7.09688	6.3693	6.49514	6.75301	4.8482	4.43786	5.76512	5.18416
Akr7a5	7.98702	7.99223	7.71634	7.40107	7.34633	7.01523	7.1553	7.72291	7.64098	7.40692	7.76454	7.65194	7.75747	6.70948	7.58243	6.97414	7.92781	7.75072	7.25526	7.47337	7.73242	7.81031
Akt1	7.73085	7.74283	8.02194	8.04806	7.75334	7.52466	8.00225	8.26838	8.07704	8.11579	7.89179	8.2924	7.98383	7.42826	8.27007	8.08481	7.78425	7.94942	7.97453	6.79711	7.68103	7.37308
Akt1s1	6.52749	6.73491	6.38421	6.62878	6.68504	4.83145	6.92107	7.33172	6.64645	6.71968	7.08344	6.1738	6.85815	5.92002	5.89126	5.88045	7.13699	7.11713	6.1416	5.61591	6.01709	5.7104
Akt2	5.42151	5.93167	5.76221	5.65567	5.62054	6.13998	5.19638	5.8405	6.14259	5.91903	5.95417	5.15473	5.69013	5.34462	5.50558	5.6818	6.21438	6.09751	5.80926	6.1626	6.43436	6.58595
Akt3	6.53	6.74856	7.16511	6.50587	6.60336	7.27522	6.74776	7.00002	6.37897	7.77619	6.68563	7.70802	7.56983	6.91859	7.86204	7.95417	6.62686	6.87471	6.89015	6.34625	6.64823	5.4394
Aktip	8.25929	7.22968	8.22943	7.89218	7.43301	8.17074	7.29459	7.65671	7.43202	7.82824	7.78041	7.44492	7.41626	7.98412	7.74926	8.89858	7.47143	6.84149	7.68886	7.2112	7.81822	6.68911
Alad	9.70629	9.50337	9.29034	10.0392	9.61529	9.98677	9.53988	10.2978	9.91889	10.1188	8.37057	8.23943	7.81389	8.73625	8.54066	9.07514	9.10197	8.67342	9.08713	10.6043	8.83332	10.6936
Alas1	7.98375	8.12404	8.59682	7.53271	7.26639	8.18129	7.89259	7.28369	7.67001	7.72223	7.85545	8.56821	8.41511	7.1249	7.41544	7.4594	6.5848	7.16079	7.56912	7.85838	7.60696	8.24478
Aldh2	4.5691	5.0475	4.84643	4.79293	4.84747	4.32418	4.18371	4.84308	4.518	4.66106	5.01247	5.46575	5.76885	4.29022	5.11579	4.508	6.11788	5.5627	4.78701	5.85265	6.25526	6.50318
Aldh3a2	6.50494	7.5631	6.26654	6.38073	6.89482	6.69944	6.46622	7.10867	7.17678	7.22951	5.01663	6.92263	7.1501	7.06968	6.07199	6.84119	6.46621	7.05509	6.9592	7.56415	7.02649	7.14214
Aldh4a1	6.39371	6.38765	6.37265	5.69444	5.08017	4.81471	5.98559	6.79387	6.1409	6.37593	6.36826	5.79327	5.9022	4.94755	5.36223	5.37827	6.15875	5.62842	5.36458	4.83603	4.95153	5.23572
Aldh5a1	3.88528	3.811	4.31892	4.13232	4.09722	4.23985	3.77586	3.92827	3.54132	4.57357	3.8802	5.28826	3.53665	3.53189	3.82486	3.79872	3.61373	3.93717	4.32626	3.53955	3.54499	3.5923
Aldh6a1	6.26695	7.20726	6.88672	5.60645	6.18544	6.90805	5.66628	4.72567	6.68807	6.21755	6.47567	6.79379	4.88582	7.25282	4.75487	7.30631	6.51723	7.21964	6.62786	6.57314	6.35651	5.85046
Aldh7a1	7.86529	8.06658	7.53256	7.79732	7.77402	7.28979	7.8448	7.84187	7.64339	7.29507	8.08762	6.73391	7.31809	7.74466	7.59974	6.93762	8.34387	7.54319	8.44541	7.7155	7.45621	7.32306
Aldh9a1	6.79557	7.77054	7.75314	7.88505	7.41835	7.9302	8.37557	7.2986	6.82711	7.7257	5.95379	6.0369	7.61048	6.87443	6.59331	6.95219	8.60157	7.71174	7.49848	9.41185	9.09718	9.46089
Aldh16a1	6.09762	6.11892	6.06153	5.64734	5.99807	5.95535	6.54621	6.70056	6.79074	6.6739	6.22344	5.15045	5.66314	6.07284	6.29501	5.92409	6.97955	6.66816	6.02702	5.60231	6.41465	6.81549
Aldh18a1	8.17249	7.3301	7.94796	8.13092	6.686	7.34852	7.89962	8.12028	6.70457	7.93473	7.8893	7.36922	6.79481	7.37238	7.27121	8.03334	7.94296	7.83063	8.20433	8.40591	8.00962	8.56264
Aldoa	12.8997	12.7128	13.0871	13.2421	13.2563	13.142	13.2675	12.7383	12.8193	12.6373	11.8932	11.9012	11.9161	12.2186	11.7257	12.0574	12.901	12.4691	12.8225	12.7861	12.9477	13.7953
Alg1	5.8573	6.19928	6.07259	6.34833	5.61661	5.42254	5.86801	6.24942	5.63075	6.19762	6.74227	5.71191	6.86739	5.76772	6.07349	5.85143	6.58446	5.90812	6.11945	5.89954	5.62252	6.35035
Alg2	8.66771	8.98245	8.70068	8.93967	8.25444	9.22202	8.57024	8.40777	8.83678	8.57405	9.49361	8.95824	8.76689	8.99199	8.97707	8.79658	8.84985	8.24028	8.90172	7.86064	7.85751	7.16063
Alg3	8.46014	8.41215	8.53184	8.9062	8.75342	8.88184	8.7186	8.43284	8.73102	8.14174	7.75237	8.57832	8.15428	7.85706	7.97614	7.93602	8.49474	8.0141	8.47866	8.15578	7.86347	8.47874
Alg5	7.96766	8.26461	7.4733	8.3242	7.968	8.87545	8.36684	8.32662	8.31506	8.28095	8.7763	8.22005	8.30551	8.67179	8.11236	8.64876	7.77525	7.61336	8.34209	8.63903	7.98086	8.26817
Alg6	7.67636	8.05765	7.12983	7.46555	7.42826	7.80441	7.86088	7.62856	6.70196	8.02142	5.80136	7.11606	6.46687	7.74034	8.1008	6.14983	7.44001	7.4867	7.6749	8.42848	7.98014	6.91483
Alg8	8.11987	8.33313	8.39216	9.03595	8.36458	8.48178	8.63836	8.85762	8.85583	8.8222	7.59874	8.42616	6.99515	8.80504	8.52111	7.97901	8.91816	8.85769	8.73632	9.31716	9.06724	9.08536
Alg9	6.28197	6.52025	6.58614	6.71431	6.69934	7.3988	6.9988	6.74048	5.69115	6.87229	6.7829	6.93831	6.94315	6.78547	6.79812	6.89249	6.65579	6.6905	6.62727	7.09743	7.11151	6.74714
Alg10b	5.64852	5.81014	5.76962	6.1377	5.7103	5.35021	6.36429	5.68067	5.65148	6.0463	4.71507	5.76642	5.82835	5.87713	5.65222	6.93886	5.51042	5.84164	5.20889	6.10125	5.94039	5.85038
Alg11	8.08469	8.21196	7.96878	8.26584	8.16789	8.19049	7.83709	7.90003	8.33486	8.46972	8.04337	7.5414	8.79572	8.84706	8.67999	8.66636	8.64333	9.16142	8.51152	8.40912	8.27406	7.84387
Alg12	7.24826	6.85054	7.30588	7.39671	7.58108	6.88866	6.81166	7.74077	7.45556	7.43934	6.65477	7.09685	7.29905	6.48299	7.21742	6.88649	7.0638	6.06518	6.49473	6.22935	6.77135	6.94328
Alg13	7.34062	7.16078	8.35375	8.0233	7.02795	8.08971	8.0529	7.31021	8.05339	7.84108	5.57731	8.45953	8.16549	8.45934	8.90259	6.89853	7.96796	8.17711	8.07756	8.49018	7.83583	8.04329
Alg14	7.58456	8.07209	8.28382	7.94003	8.10794	7.99678	7.57333	7.76085	6.6229	7.61345	7.63039	8.15921	7.94396	8.23991	7.86597	7.70644	7.74168	7.56747	7.93265	7.36274	7.30751	7.48038
Alkbh1	7.66734	8.35343	7.5507	7.98907	8.01469	7.34793	7.9867	8.12103	8.46011	8.17803	7.22825	7.4998	7.79938	7.71715	8.25356	7.47331	8.26859	8.30017	7.99378	7.81033	8.11574	7.83828
Alkbh2	5.05712	4.64648	4.91737	5.05823	5.03099	4.60962	5.24316	4.969	5.27211	5.34769	5.23513	4.9604	4.95562	4.44203	5.14344	4.9144	4.86703	4.90778	4.9254	4.673	4.56385	5.03377
Alkbh3	7.88091	7.18216	7.61285	7.92782	7.66132	7.70987	7.73692	8.06487	8.23198	7.70622	6.98144	7.12796	7.22541	7.17201	7.00782	7.65581	7.01166	7.3637	7.88174	7.88388	7.58178	8.12811
Alkbh4	5.30333	5.11432	5.7922	5.3758	5.02014	6.07056	4.77183	5.42218	5.33262	5.64747	5.7006	4.99437	5.30275	5.21903	4.83637	5.42874	6.11386	6.00406	5.7607	5.64769	5.38711	5.90613
Alkbh5	9.48186	8.95989	9.68233	9.61403	9.32187	10.4596	9.40958	8.93304	9.50281	9.02428	8.75277	9.47291	9.20016	9.53682	9.41595	8.92837	9.00964	9.37742	9.38789	9.37437	8.96959	9.18896
Alkbh6	7.00122	6.78443	6.32072	7.27594	6.86936	6.84492	6.99866	7.20379	7.29193	6.60763	6.86533	6.42704	6.90942	6.39113	7.03598	6.97141	7.1386	7.03274	7.10119	6.45249	7.01569	6.51763
Alkbh7	6.5017	6.65251	6.01726	6.83579	6.91899	6.84947	6.93893	6.47884	6.66369	6.99857	6.29191	6.61785	6.53854	6.75817	6.42743	6.91207	6.98165	6.73052	7.09109	6.77724	6.88374	7.26359
Alkbh8	6.94631	7.19443	6.95396	7.30504	7.39775	7.97647	7.44195	7.25963	7.40202	7.01605	7.81798	7.47908	7.73097	7.55065	7.59407	7.06306	7.51514	7.64968	6.98213	8.47009	7.77694	6.83929
Alms1	4.78097	5.04661	4.9353	5.01628	5.86013	4.43427	5.10974	5.45909	4.48178	4.40879	5.24442	5.51934	4.4002	5.36433	5.63524	6.10353	5.22329	5.11637	5.17653	5.68716	5.47307	4.90436
Alox5	3.27345	3.32691	3.23083	3.24206	3.89628	4.42525	4.11327	3.24697	3.25745	3.25897	3.22519	3.22338	3.2352	3.21111	3.23648	4.52265	5.95569	4.76557	4.99846	5.32596	5.71423	5.51272
Alox5ap	5.39282	6.49892	7.36403	7.0132	4.92013	6.73547	6.72609	6.20009	5.70355	6.27906	6.51466	7.54834	6.9349	7.4801	8.41255	8.22869	9.62598	9.80252	9.26331	9.62349	9.82974	9.56073
Alox12	5.33188	3.28759	5.64508	4.3878	4.50673	6.19579	3.5	6.685	3.33311	4.69706	8.16034	8.47356	8.74185	7.21037	6.61824	8.28487	3.18456	3.13486	4.51223	3.29589	3.84814	3.41146
Alpk3	4.40433	4.62829	4.25821	4.25977	4.38741	4.6696	4.4344	4.7955	4.26202	4.77778	5.46363	5.51918	5.41255	4.67218	5.24811	5.29475	4.91967	4.78843	4.60402	4.28333	4.29383	4.26486
Als2	5.9766	5.7789	5.62157	5.40514	5.41592	4.58595	4.91633	5.3121	5.00757	5.51798	5.3409	5.00508	5.48395	6.1926	5.1724	5.6454	5.4737	5.20144	5.40935	5.54199	6.04678	5.24916
Als2cl	5.78147	6.47258	5.58545	5.04097	5.22922	4.49684	4.48791	5.40571	5.66573	6.27633	5.2428	6.21585	5.59556	5.85889	5.76292	5.72223	5.17265	5.14166	4.96128	4.99259	4.51185	4.94399
Alyref	6.62508	6.93324	7.03695	7.56647	7.774	8.23372	8.04928	6.4305	7.66811	7.43108	7.00705	7.08297	6.31068	7.70475	7.55903	7.40838	7.73843	7.93079	7.27235	6.99695	7.13335	7.75761
Alyref2	4.23188	4.47201	4.4046	3.98373	4.62812	4.0835	4.1654	4.47008	4.78498	4.41942	4.53647	4.38878	4.00013	4.1453	4.00091	4.31942	4.20742	4.40464	4.20136	4.41021	4.32342	4.5686
Amacr	6.34524	6.68506	6.5746	6.6356	5.92047	7.17221	6.36741	6.30272	6.85227	6.28287	5.25185	6.42326	6.59638	6.30789	5.53726	5.79262	5.54172	5.69183	5.72837	5.76528	5.04804	5.66929
Ambra1	5.4604	4.98524	5.47006	4.92356	4.81421	5.19588	4.67408	5.91035	5.14065	5.80971	5.44413	5.32055	5.17544	4.63585	5.18409	4.81315	4.92173	5.50807	5.018	4.7476	5.02981	5.27418
Amdhd2	7.64162	6.96633	6.40035	6.98149	7.12708	6.57225	6.41414	7.31541	7.31886	6.37532	7.34723	7.44788	7.13278	6.56174	6.39347	7.04721	7.66063	7.00065	6.99688	7.09451	7.64254	7.66022
Amer1	6.14267	5.35362	6.08779	6.41512	6.4485	6.54289	6.4996	6.24455	6.43262	5.65452	6.72018	6.53098	6.11905	6.77195	6.06898	6.55193	6.49211	6.09407	6.70803	6.41464	5.8695	6.14443
Amfr	8.15857	8.45551	7.99563	7.96082	8.22035	8.29142	7.98462	7.99865	8.64158	8.29233	8.65748	8.84032	8.39469	7.94307	7.91461	8.46014	7.91791	7.9362	8.08404	7.52775	7.58654	7.59631
Amigo2	5.80833	7.15608	7.1056	6.03823	6.50719	6.52257	7.34615	6.42758	6.67143	6.84264	8.81369	7.92062	7.9644	6.96323	7.3684	7.82203	5.50298	5.11167	6.97547	4.3552	5.00557	4.43406
Amigo3	3.76802	3.39313	4.07371	3.85246	3.39475	3.82278	3.39036	3.82757	3.65585	3.85864	3.39072	4.21295	3.39179	3.7103	3.39193	3.75295	3.39085	4.03249	3.54005	3.63504	3.56135	3.72755
Ammecr1	6.46873	4.96701	6.63302	5.15457	4.93905	4.36609	4.66993	5.63956	4.9548	4.50784	6.37901	7.70753	7.04124	6.47635	6.01737	6.39764	4.51707	5.64204	5.8283	6.22262	5.36776	5.80351
Ammecr1l	7.98562	8.09152	7.14403	7.87125	8.31367	7.77117	7.90195	7.85741	8.42374	8.04388	8.15398	7.69559	7.27272	7.64473	9.14563	8.3514	7.92069	7.41818	8.09489	7.05978	7.8552	7.76044
Amn1	5.79019	6.25368	6.90243	5.86115	6.18781	6.43484	6.83089	6.57272	6.18211	6.09661	6.72666	6.52295	6.95955	6.89655	7.05507	6.20176	6.01523	6.33994	5.79956	6.71356	6.72226	5.49924
Amot	6.54547	6.94481	6.49531	6.94769	7.30421	6.96219	6.24588	4.47971	6.6476	6.96901	6.77998	6.83059	8.2262	9.03024	7.95889	8.06576	6.40903	6.30792	7.70889	6.01526	5.17493	4.48041
Amotl1	9.26509	9.31749	9.60715	9.31779	9.45487	9.08421	9.27797	9.63855	9.8153	9.05426	8.61044	9.1799	8.58521	7.66097	7.87323	7.83034	3.91335	5.42002	7.6405	6.4772	4.27565	4.28762
Amotl2	6.86371	6.86777	6.94693	6.81722	6.7381	7.19081	7.03487	7.27655	6.65077	6.4927	6.98875	7.31621	7.07865	7.32153	7.16678	7.18034	5.90277	6.19257	6.61852	5.3937	5.6674	4.85942
Ampd2	7.95236	7.7413	7.86958	7.60461	6.92998	6.77677	7.35371	8.46497	8.71319	8.65463	8.06345	7.4446	8.56172	6.92501	7.89733	7.90838	8.91301	8.30568	7.31233	7.81908	6.85744	7.98403
Ampd3	4.37539	4.04111	4.30769	3.98689	3.95049	3.93847	3.92633	3.94144	5.69079	3.94884	3.92838	4.62597	5.35734	5.13148	5.40612	5.78584	5.41679	5.31869	3.92802	6.24402	5.37879	5.64086
Amt	3.4627	3.3217	3.46758	3.3211	4.03305	4.01381	3.73515	3.73379	3.82758	3.32304	3.90016	3.8681	3.32034	3.80973	3.32048	3.65133	3.49458	4.12134	3.39997	3.3219	3.32485	3.32508
Amz2	7.79945	7.06343	7.77995	7.59916	8.03637	7.95811	7.54083	7.68481	8.26691	7.82891	7.464	7.94658	6.92293	7.52725	7.57754	7.53414	7.53536	7.42053	7.59648	7.80306	7.92125	8.15368
Anapc1	9.35019	9.16009	9.56942	9.50576	9.61078	9.7815	9.38723	9.72641	9.92702	9.28648	9.10271	9.66842	9.47405	9.43857	9.74732	9.9301	8.92762	8.71122	9.21306	9.67235	8.72291	9.16396
Anapc2	9.08026	9.6866	9.21236	8.63289	9.38243	9.18135	8.95242	9.49306	9.44406	9.52141	8.96316	9.07055	9.39992	8.8099	8.76048	8.71287	8.88865	8.50867	8.5117	8.17554	7.93961	9.07616
Anapc4	9.82064	9.89875	9.61118	9.71145	9.44271	9.41718	9.50048	9.37527	9.60399	9.67948	10.0916	9.98523	9.42226	10.1527	9.23163	10.0529	9.34076	9.51935	9.42477	9.5445	9.56074	8.97505
Anapc5	11.0658	11.1833	11.0974	11.0857	10.8431	11.0665	11.0034	11.1318	10.6124	10.9871	10.8743	10.3816	10.4233	10.652	10.4765	10.4811	11.0009	10.7338	10.9737	10.5797	10.6991	11.1326
Anapc7	8.38422	8.14247	8.58531	7.17455	7.72707	7.26023	7.46762	7.58027	8.78472	8.48688	8.66864	8.19051	7.9156	7.24021	7.55775	6.56179	8.11114	7.94783	7.61051	7.82862	7.44148	8.1113
Anapc10	8.33214	8.19418	8.52488	8.83726	8.74739	8.98605	8.44091	8.55247	7.47336	8.7472	8.56692	8.89656	9.24701	9.71621	9.51462	9.25439	8.9419	9.27665	9.14485	9.6389	9.44536	8.3653
Anapc11	9.0862	8.80592	9.31185	8.9775	8.99085	9.20988	9.3812	9.18676	8.96088	8.93144	9.09147	9.38645	9.63478	9.30119	9.04583	9.06229	9.42056	9.12155	9.47588	9.0408	9.08161	9.43344
Anapc13	8.02695	7.9546	8.10288	8.04024	7.85235	8.03312	8.0035	7.91069	7.90463	7.67153	7.48026	7.84797	7.88043	7.7259	7.72205	7.70848	7.81042	7.43562	8.13991	7.93352	8.02306	8.13927
Anapc15	7.86863	7.61327	7.50435	8.03383	7.60838	7.82149	7.60123	7.6344	7.82763	7.7842	6.71993	6.51068	6.76053	7.43045	7.69358	7.52914	7.82792	7.40264	7.22765	7.95118	8.25311	8.62557
Anapc16	7.54483	7.8806	8.24725	8.1694	8.03402	8.26602	8.02289	7.88883	7.47118	7.9809	7.95145	7.81909	7.85232	7.87111	7.686	7.38815	7.71109	7.6091	7.93903	7.73834	7.70929	7.93819
Angel1	5.34455	5.31408	5.50261	4.78757	4.64687	4.15425	4.32892	5.51166	6.09769	5.42496	5.39574	5.0113	4.41876	4.55742	4.78914	4.86884	4.55672	5.03681	4.70034	4.15721	4.2195	4.16876
Angel2	8.67216	8.82365	8.33415	8.8505	8.81399	8.62861	8.52937	8.4816	8.61023	8.58508	8.61284	8.4092	8.66152	8.58577	8.58508	8.65968	8.54714	8.51949	8.80806	8.29173	8.44482	7.91788
Angpt1	6.1161	3.55351	3.11472	5.61921	3.33166	3.19961	5.6443	4.64192	3.30489	3.31474	3.47836	6.24029	6.67178	7.12216	8.75509	7.28574	9.7459	10.1598	8.30401	8.13397	8.14231	3.90832
Angpt2	4.98312	5.44853	4.79935	4.91433	4.43204	4.53478	4.10209	4.97287	4.79357	4.83545	4.05221	4.39497	4.77876	4.112	4.62779	4.55027	4.05257	4.04986	4.58885	5.36143	5.59031	4.28096
Angptl2	5.36398	5.72625	5.91193	4.53012	5.50072	5.22509	4.76034	6.00734	5.60609	5.60599	5.2799	6.26245	6.08422	4.79822	4.39927	5.22753	5.0438	4.5698	4.75597	4.93698	4.41531	4.84434
Angptl4	4.9024	4.92951	4.73851	5.15764	5.69108	5.42062	5.10832	5.31789	4.43779	5.58442	5.29799	5.09314	5.17656	4.53398	4.6823	5.32282	6.1392	5.65865	5.66551	6.23023	6.10564	6.30679
Ank	4.19849	3.85338	4.9029	5.3861	4.70844	3.94405	4.58808	3.85314	3.96827	3.86002	3.84099	4.40813	3.84652	3.83338	4.66541	4.01394	6.22543	5.97661	5.58098	5.29591	4.95476	5.27123
Ank2	4.75184	4.68465	5.10846	4.43046	4.93	4.1808	4.7491	3.85492	5.21721	4.62187	3.84941	3.84896	4.56607	3.90858	4.78393	3.84884	4.08577	3.87112	4.609	4.20557	3.86223	3.86274
Ankfy1	8.05193	7.76345	7.59319	7.73451	7.66595	6.82481	7.52836	7.76795	7.38765	7.99788	7.04413	8.35277	7.87184	7.51486	8.03334	8.03145	7.36543	7.34748	7.36469	8.68435	8.17661	7.8645
Ankhd1	7.34244	7.57066	7.64988	7.4989	8.09793	8.04847	8.23908	8.2512	7.83649	7.51263	7.85071	8.13796	8.15541	7.98625	8.1704	8.93533	7.52579	7.56715	7.31977	8.16929	7.89801	7.50555
Ankib1	7.10425	6.75696	7.60396	7.28756	6.45945	7.12502	7.14538	6.5232	5.96986	5.98217	7.19591	7.60422	7.52528	8.35313	8.09804	7.81799	6.84114	7.47056	7.48112	7.73475	6.45261	5.47606
Ankle1	5.4663	5.58763	5.28704	6.14383	5.81215	6.30584	5.2949	5.34463	6.85465	6.53257	4.51868	4.51719	4.527	5.52283	5.77618	5.2274	6.31922	5.75112	5.76997	6.12774	6.28563	6.59275
Ankle2	7.44505	8.4044	7.63687	7.66045	8.21765	6.57013	8.00755	7.64553	7.33102	8.52228	7.00372	8.34724	8.33501	7.95859	7.90888	8.39313	7.86337	8.38444	7.99705	8.16462	8.13505	8.23143
Ankmy2	6.76591	7.51085	6.84925	6.90947	7.49766	7.69202	7.30661	7.28418	6.1101	7.56128	8.17686	7.28294	7.40605	7.36341	7.16079	7.40192	6.84489	7.00872	7.29107	7.78619	7.23288	7.14912
Ankra2	6.89563	7.5999	7.74831	7.37188	7.40323	6.51486	6.94169	7.56743	6.64466	7.76737	7.7803	8.71152	8.30532	8.18268	8.28828	7.64849	7.79546	7.71778	7.62924	8.41712	7.47587	7.01071
Ankrd9	3.11654	3.11398	3.27626	3.13947	3.11535	3.50084	3.15067	3.11394	3.11494	3.50939	4.01334	3.61011	3.11284	3.53868	3.32654	3.15145	3.54484	3.43969	3.27999	3.62477	3.11661	3.70666
Ankrd10	9.49129	9.84543	9.47211	9.36078	9.54071	8.6231	9.50952	9.29999	9.76671	9.64546	10.5883	9.64536	10.2591	9.76381	10.4115	10.1214	9.6349	10.2624	9.84747	9.37686	9.07546	8.89199
Ankrd11	8.12702	8.17466	8.67754	8.17765	8.53048	7.748	8.27577	8.44785	8.64517	8.0122	8.60312	8.56339	8.47264	8.07945	7.7763	8.09548	7.73693	7.62163	8.01621	7.12793	7.50012	8.00675
Ankrd12	5.78678	6.15186	6.40024	5.72734	5.32628	5.68011	5.99604	5.74926	5.9936	5.90184	6.6609	7.04684	5.9767	6.5102	6.67403	5.78214	5.41084	6.06615	5.59922	6.25895	7.37184	6.46514
Ankrd13a	7.40036	7.79975	7.37009	7.53052	8.23858	7.60586	7.58194	7.67279	8.33617	7.4725	7.94941	8.06713	8.44517	7.98565	8.75635	8.28592	7.88365	8.08463	7.94971	7.85169	8.47785	8.14822
Ankrd13b	4.04014	4.35909	4.26707	3.89614	4.05159	3.73861	3.81957	4.13009	4.39956	4.21206	4.39946	3.8224	4.26845	3.97167	3.71261	4.32025	3.96014	4.43614	3.75067	3.97452	3.78717	3.99611
Ankrd13c	6.03505	6.11627	5.8439	5.45105	5.91145	6.18326	5.57894	5.56906	5.92144	6.39908	6.91648	6.28393	6.11039	5.91486	5.63247	6.17573	5.06532	5.90327	5.55383	6.13167	6.26946	5.80272
Ankrd16	7.32675	7.00444	6.65361	6.84412	6.70788	6.49461	6.92873	7.16465	7.00873	6.47923	7.05265	7.1679	7.85974	6.75386	6.41836	6.68983	6.60957	6.68306	6.76778	6.75199	6.50785	6.77599
Ankrd17	9.4461	9.11189	8.97624	8.8026	9.32737	8.81361	9.351	9.38727	9.32704	9.20436	9.47915	9.26145	9.53108	9.34798	9.4412	9.90382	8.44797	8.98704	9.2957	8.81993	8.85569	8.47613
Ankrd23	5.40355	5.27595	5.33474	4.77484	5.02977	4.36523	5.33636	4.83391	5.26336	5.28563	5.64454	4.34642	4.97975	4.87097	4.98784	5.31825	4.37355	5.13223	4.55665	4.76917	4.6102	4.61503
Ankrd24	3.44942	3.44732	3.70071	4.08967	3.47437	3.44691	3.44541	4.04219	3.44811	3.65553	3.58618	3.67714	3.88221	3.63814	3.89929	3.62302	3.78625	3.78878	3.87477	3.51396	3.63942	4.02252
Ankrd26	6.79927	6.45398	7.15188	6.65869	6.61746	6.71167	7.49994	7.39784	6.93358	6.98903	7.09271	7.2287	6.87078	7.63161	6.54529	7.47071	6.53873	7.03512	6.86595	7.09143	6.64771	6.20906
Ankrd27	7.0315	7.66394	7.21996	7.29095	7.0571	7.16794	7.05444	7.29799	6.82758	7.0316	6.68135	7.15904	6.73538	7.29691	6.79003	6.61475	7.48392	7.3524	7.30192	7.35558	6.64414	7.07234
Ankrd28	6.67854	6.93132	6.57428	6.69908	6.56478	5.0556	7.093	6.40688	5.67115	7.10666	6.67465	7.2749	6.67946	6.89205	7.87863	7.0207	7.08729	6.84382	7.15873	7.51778	6.41099	6.92533
Ankrd29	5.34793	5.16711	6.1966	4.99961	5.37271	5.34754	5.73718	4.22228	4.81177	3.99023	7.66045	7.18666	6.24361	7.65271	7.91751	7.75815	4.58308	7.18628	6.69723	4.06288	4.02839	4.03294
Ankrd33b	3.62112	4.08364	3.73674	4.18618	3.78962	4.41788	4.16356	4.25401	3.54026	4.02978	4.258	4.58233	3.53676	3.5332	4.34828	3.53491	3.53543	3.88048	3.85523	3.53893	3.54303	3.54334
Ankrd37	7.62461	7.45065	8.5977	6.43256	7.11166	6.57677	6.64559	5.52041	6.77773	7.01649	7.6521	7.90361	7.44827	6.01398	6.73514	6.23125	5.82486	5.89387	5.66714	6.68255	5.64951	6.68998
Ankrd39	5.60981	5.4907	5.6458	5.70011	5.36212	4.65145	5.32378	5.68704	5.76353	5.85862	5.47685	5.78782	4.90628	5.81372	5.2982	5.76899	5.49663	5.81339	5.58314	5.64877	5.5502	5.27066
Ankrd40	6.6251	6.55944	6.57086	7.20309	7.12819	6.92562	7.57061	7.08462	6.58083	7.44774	7.39097	6.4362	7.16515	6.74279	7.04993	6.74038	6.13466	5.978	6.25357	5.90761	6.60539	6.69373
Ankrd44	4.25103	5.13892	4.59114	3.94943	5.42052	3.94946	5.27299	5.16671	4.49279	3.90585	3.87604	4.25474	3.99018	5.55302	5.61804	4.97683	4.0968	3.99248	4.90796	7.01443	6.52132	5.74311
Ankrd46	8.79704	8.95162	8.01184	8.23522	8.29019	8.40246	8.62558	8.42388	8.06091	8.71878	8.75031	8.32421	8.40245	6.4895	7.93856	8.01991	7.5674	7.79169	7.69898	6.81371	7.44971	8.17431
Ankrd49	8.29968	7.75112	8.17244	8.521	8.44052	8.5666	8.307	8.10791	8.08516	8.87955	7.45114	7.64238	7.36628	8.39144	9.16992	8.69902	9.21203	8.98321	8.69946	8.95708	8.75614	8.4763
Ankrd50	6.89984	7.00061	6.24472	6.652	6.86821	7.06731	6.82227	6.33166	7.30273	6.92883	6.96095	7.00327	7.51008	6.8156	6.16144	5.21624	5.66273	5.98993	6.30419	4.67936	5.24403	4.99647
Ankrd52	3.70018	3.73729	3.67166	3.31666	3.31805	3.37768	3.577	3.33899	3.85335	3.91554	3.64865	3.87074	3.47557	3.31463	3.40947	3.37786	3.44309	3.32962	3.31549	3.70244	3.66329	3.40612
Ankrd54	7.37113	7.78723	7.01189	6.7383	6.59239	6.4219	6.96381	7.71722	7.18657	7.64279	6.98413	6.99219	6.75402	5.83723	7.47513	6.35497	7.42211	7.04642	6.59582	6.81291	7.18202	7.33788
Anks1	5.27794	5.19155	5.61579	5.299	4.89007	5.50836	5.46956	5.66254	6.00181	5.38181	5.26092	5.71051	4.95641	5.07501	5.75653	6.19063	6.20291	5.97855	5.69062	4.98679	5.89181	5.64688
Anks3	6.25455	6.07229	6.04068	5.91553	6.18753	5.50631	6.40034	6.64938	6.62847	6.72811	5.10479	6.53319	6.41065	5.89872	5.37673	5.90847	6.07314	5.78613	6.14615	5.72422	6.14659	5.95192
Ankzf1	5.69043	6.09625	5.78662	5.65264	5.07303	4.92128	5.21681	6.04664	5.10687	5.9433	6.2472	5.81457	5.62996	4.81097	4.71219	5.78746	5.60432	5.57189	5.53976	5.48883	5.79549	6.07063
Anln	9.14026	9.0463	9.05302	9.48718	9.14069	8.61472	9.20436	8.26201	8.95479	9.36275	7.31562	8.47453	7.54368	9.84876	8.9936	8.95045	9.11924	8.63036	9.39312	8.82581	8.91272	8.50096
Ano6	8.10439	8.54305	8.70622	8.57565	8.92403	8.12103	8.55296	8.76624	8.6784	8.9977	9.28424	9.53798	9.57246	8.61531	9.32589	8.51794	7.71355	7.66718	8.44	6.55788	7.60588	7.61587
Ano10	7.67142	7.27418	7.70469	7.19419	6.82966	7.63957	6.95475	7.36583	7.83795	7.52711	7.70933	7.60589	7.69136	7.25935	6.86604	7.23481	5.6125	5.75918	6.79607	5.7489	6.66149	6.79765
Anp32a	8.09502	8.25058	8.41848	8.62937	8.85614	7.87246	8.82112	8.44859	7.63115	7.32728	7.9705	8.62548	8.15069	8.64136	7.82908	7.85727	7.55477	7.75039	8.70434	8.90169	8.64726	8.27518
Anp32b	9.54738	10.0085	9.91065	10.1034	10.3599	10.2143	10.4413	10.0525	10.5374	10.2081	9.18901	9.24916	9.26429	9.84237	10.1702	9.96829	11.1229	10.9032	10.0659	11.2103	10.7231	11.0772
Anp32e	8.71044	8.9554	8.20256	9.47939	9.12502	8.64596	9.46371	9.01285	9.09917	9.31467	8.2618	8.39678	8.28913	9.24815	9.31559	9.21493	9.0938	9.61425	9.32786	9.67552	9.80056	9.41868
Anpep	4.06121	3.81694	3.81526	3.8981	3.81846	3.81639	3.81438	3.8169	3.818	3.81817	4.55268	4.1153	4.80883	4.47051	4.65415	4.42707	4.48188	4.51618	4.19278	4.10143	3.87834	4.28404
Antxr1	3.2157	3.18892	3.89198	3.26141	4.38001	3.18345	3.16243	3.18849	4.5066	3.20083	5.52972	6.11015	5.43566	3.93604	4.68343	4.94256	3.16729	3.15774	4.37273	3.78862	3.21637	3.21825
Antxr2	7.26163	6.70615	7.05101	7.48966	7.22386	7.07244	7.01095	7.71343	6.99468	7.08579	7.25036	7.42103	7.44428	7.32503	6.79437	6.87602	5.99031	5.51199	6.42844	6.23399	6.30409	6.57652
Anxa1	5.93152	5.67346	6.79436	6.64822	5.65159	8.55998	6.41167	4.35622	4.3955	6.15216	7.59964	8.22273	7.48621	7.03698	7.61601	8.57283	7.09193	6.51846	7.85661	8.76863	7.51796	7.425
Anxa2	12.2372	12.0559	12.5492	11.8122	11.7711	11.9367	11.7779	11.6162	11.309	11.5845	11.814	12.1421	11.5871	11.6872	10.7216	11.2379	6.72152	7.58932	10.9025	9.13028	9.78316	9.471
Anxa3	11.1783	11.04	11.4169	10.8818	11.148	11.3748	10.9514	10.488	10.562	10.7725	10.8204	11.8198	10.946	11.4428	10.7672	11.1416	8.00132	7.78439	10.1039	10.18	10.7183	10.2599
Anxa4	6.90627	7.02564	7.67921	6.17787	6.62997	6.67529	6.22633	6.80821	7.43303	5.86449	7.83019	7.22585	7.067	7.35711	7.25597	7.36572	6.82732	7.22379	7.30106	6.8134	7.67743	6.90628
Anxa5	11.8429	11.6954	11.8804	11.7154	11.548	11.9067	11.6043	11.1416	10.7648	11.1915	11.735	11.8701	11.5797	11.8194	10.9923	11.733	9.38956	9.70355	10.908	10.4936	10.1555	10.2171
Anxa6	11.1891	11.2512	11.3743	10.3177	10.6401	10.3358	10.3931	10.5022	10.6071	10.4038	10.8662	10.7985	10.9116	10.7342	9.89318	10.4642	7.86519	8.38431	9.57137	8.83828	9.37527	9.69021
Anxa7	8.69133	7.64041	8.44946	8.69216	8.71154	8.9167	8.71058	8.3899	7.98909	8.71861	8.75706	9.11329	8.96257	9.31487	8.71453	9.42186	9.00728	9.47289	8.70491	9.30022	8.90977	8.93061
Anxa9	2.79933	2.79806	2.81491	2.79781	3.25135	2.79781	3.08403	2.95795	2.89221	2.79861	2.79706	3.04482	2.7975	2.79646	3.07359	3.15051	3.10143	3.0567	2.79703	3.11234	3.23481	2.82875
Anxa11	3.3136	3.08363	3.17051	3.09554	2.98025	3.16528	2.99362	3.20989	3.05138	3.0526	3.33342	3.27298	3.16608	3.00346	3.19928	3.00944	3.27278	3.17282	3.07127	3.18046	3.23406	3.21577
Ap1ar	5.74601	5.75217	6.28754	6.33238	6.40103	6.37372	6.32799	6.14796	7.01156	6.07384	6.97682	6.38462	5.97865	6.32646	6.62545	5.57401	6.0994	5.96863	6.3476	6.47875	6.17826	6.21838
Ap1b1	7.76584	7.87903	8.05305	6.70863	7.41253	7.60482	7.24406	8.61406	8.60217	7.30328	8.65112	8.05304	8.66193	8.06878	7.44683	8.06548	8.20246	7.78162	7.32967	8.23558	8.95656	9.30681
Ap1g1	8.02027	7.34389	8.08393	7.97767	7.83762	7.96677	7.97002	7.34604	7.53225	7.63817	7.38187	7.99391	7.67703	8.22745	7.69854	6.87418	7.36884	7.98868	7.54873	7.57488	7.93727	8.02002
Ap1g2	6.20053	6.26705	5.11146	4.97157	6.35193	4.53981	5.67181	6.22539	6.78363	6.11911	6.33063	5.396	4.53146	5.53415	5.52418	5.583	7.05933	5.97986	6.10127	6.77636	7.08248	7.2916
Ap1m1	9.28919	9.1669	9.27841	9.17986	8.91565	8.94214	8.61484	8.66918	9.10669	8.78422	8.73743	8.97076	8.28247	8.49841	7.87651	8.38771	9.49176	9.03183	9.09893	9.02688	9.3704	9.62377
Ap1s1	8.96288	9.2551	9.09936	8.61651	8.97822	8.46441	8.96692	8.90103	9.20079	9.06579	8.39306	9.08674	8.73645	8.46953	8.64504	8.72409	9.33892	8.83243	8.91518	8.74836	8.90175	9.43768
Ap1s2	8.3453	8.51655	9.35313	8.05927	8.09034	8.40876	8.50243	8.95841	8.33434	9.56582	9.47777	9.05558	8.78761	8.39061	9.08955	9.4871	8.12113	6.72616	7.45158	9.29884	9.24983	8.88115
Ap2a1	6.02508	6.25308	6.14936	5.90199	5.70791	4.75483	5.86634	6.36154	6.71115	6.64971	6.02865	6.52466	6.46856	5.30494	6.08244	6.2648	6.18231	6.01586	5.49398	5.48086	5.5812	5.63636
Ap2a2	9.31048	9.09776	9.17592	9.39638	9.5322	9.9104	9.18995	9.2419	9.37921	8.95157	8.98488	8.90719	8.95607	9.16669	8.73828	8.83082	8.48236	8.52925	9.06301	8.56169	8.86204	9.50861
Ap2b1	8.33338	8.33544	8.6191	8.16996	8.6573	7.68742	8.24032	8.51853	7.40178	7.46764	8.23638	8.77503	8.53436	8.29524	7.78118	8.03268	7.52589	6.88534	7.652	7.59575	7.78724	8.40696
Ap2m1	10.1268	10.2228	10.3404	10.1654	10.2446	10.6091	10.1623	10.1977	10.3264	10.0683	9.7186	9.79285	9.75057	9.68303	9.49979	9.4124	10.032	9.69152	9.7642	9.47685	10.1181	10.3128
Ap2s1	10.347	10.2276	10.267	10.062	10.1087	10.0394	10.2473	10.1358	10.1087	9.88985	10.0293	10.2161	10.4683	10.0143	10.0731	10.2423	10.221	10.1451	10.1971	9.64889	9.96726	10.1753
Ap3b1	7.90463	8.39786	7.82717	8.13684	8.13975	8.10718	8.48154	8.30771	8.10957	7.66265	7.98388	8.49946	8.58203	8.21524	8.48482	7.89605	7.97584	8.01536	8.00731	8.33964	8.01015	8.13652
Ap3d1	7.82852	8.30421	7.82866	8.14344	7.86921	7.76196	8.32209	8.99376	8.04043	8.08175	8.20978	8.49982	8.59793	7.67821	7.73147	7.81569	7.52359	7.84256	7.75865	7.55791	8.31024	8.70465
Ap3m1	9.47016	9.23733	9.46486	9.23743	9.16378	8.52998	8.96187	9.13002	8.78901	9.02708	8.77824	9.55135	9.71197	9.87042	10.0078	9.94513	8.81055	9.13139	9.58811	9.78165	9.54025	8.96688
Ap3m2	5.25446	5.63759	4.97862	4.76111	5.00535	4.31559	5.08126	4.58265	4.84996	5.42325	4.74844	5.77305	5.08284	5.24165	5.3448	4.30923	4.33687	4.83845	5.17253	5.10934	5.41513	4.72688
Ap3s1	7.91797	8.18481	8.65534	8.58515	8.7914	8.98615	8.9921	7.98317	8.41448	9.16684	9.28634	8.97198	9.31858	9.80068	9.59245	9.87801	9.0502	9.71878	8.9809	10.3919	10.1204	8.40745
Ap3s2	7.71429	7.89973	7.83953	7.56003	7.94647	7.80214	8.03409	7.67461	7.71395	7.74242	8.27913	7.98241	6.57272	7.96139	7.505	8.01718	8.27508	7.72343	7.9537	7.83121	7.85592	7.66838
Ap4b1	7.10948	6.50212	7.13186	6.84181	6.59584	6.86501	7.13232	6.02697	6.89106	6.96618	7.86977	6.54064	7.68201	6.745	7.08905	7.3273	6.61681	6.84414	7.17687	6.8606	7.22098	7.38234
Ap4e1	6.48146	6.67411	6.67652	6.28767	7.01498	6.5423	6.75221	5.75705	5.63252	6.73281	7.21988	7.59525	6.23306	7.19239	6.55298	7.29943	6.45701	6.93601	6.91958	6.89141	6.07173	6.75318
Ap4m1	5.281	5.41481	5.91155	5.10176	5.05711	4.95974	4.79286	5.29486	5.32376	5.6043	4.84123	5.63915	5.39447	4.72756	5.08206	5.57676	5.41036	4.74073	4.70453	4.64855	5.49565	4.5335
Ap4s1	7.14328	7.09304	7.70975	7.58215	7.32668	7.68813	7.70551	6.78403	6.94139	6.63974	6.64203	7.32956	7.41484	7.4893	7.49358	7.78983	7.35891	7.82295	7.44179	7.7701	7.7259	7.59421
Ap5m1	7.29454	7.45136	7.481	6.33565	7.26844	6.22343	7.48908	6.06164	7.27852	7.90496	7.00084	7.92028	7.74761	7.96714	7.23652	7.36281	7.75775	7.94021	7.12994	8.42257	7.73484	7.27348
Ap5s1	5.12877	5.0126	4.66301	5.20827	4.31088	5.30371	4.76068	4.76623	5.18865	5.07912	4.80563	4.60066	5.1872	5.02598	4.53828	5.19877	4.56268	4.80459	4.50424	4.98175	5.17786	5.07682
Ap5z1	5.0042	4.8921	4.77765	4.47394	4.98851	4.91409	4.87572	5.27622	5.37178	5.46273	4.94127	5.06621	4.90887	4.79689	5.24476	5.12777	5.12612	4.60943	4.64143	4.8999	5.48593	5.60195
Apaf1	7.39862	7.79309	7.89301	7.37956	7.73239	5.2011	6.44007	7.08227	7.1681	7.63936	8.1096	8.06149	7.63926	7.8009	5.16539	7.03787	6.41111	6.07664	6.80297	7.776	6.83213	6.77136
Apba3	6.18432	6.44477	6.81234	5.95785	6.40953	6.43326	6.62038	6.42452	6.78616	6.37747	6.84529	6.28729	5.98207	5.87067	5.92344	5.41276	6.60874	6.13084	5.97597	5.58157	5.49563	6.41717
Apbb1	5.83546	5.41737	5.63649	4.93003	5.5292	4.48631	5.34474	5.78054	5.93491	5.73882	5.48482	5.03981	5.86703	5.25667	5.67206	5.10242	4.92284	5.20645	5.32034	4.71984	4.46584	4.46674
Apbb1ip	3.55761	4.15082	3.27167	3.28141	3.29846	3.28143	3.6241	3.28568	3.29481	3.29614	3.2668	4.21279	3.27546	3.63433	4.07782	3.87953	5.21625	4.98153	4.44611	5.78806	5.75819	5.05683
Apbb2	7.51491	7.57191	7.64127	7.22545	7.34738	7.73145	7.71105	8.08037	7.15726	7.53728	8.7292	8.64946	8.55211	7.16509	6.46838	7.6028	4.40689	5.39733	6.43734	6.20795	5.80545	5.97724
Apbb3	4.89408	5.93313	5.98526	5.16376	5.21376	5.94597	5.66035	5.73748	6.61702	6.57151	6.17578	5.43368	6.09798	4.60353	5.83772	5.84785	6.17167	6.45119	5.12541	5.33016	5.63536	5.66514
Apc	8.13804	8.10097	8.4977	8.02847	8.65439	6.91124	8.60283	7.02817	7.74875	7.72691	9.1682	9.48453	9.6652	8.82894	9.36123	9.03204	7.54665	8.38987	8.10718	7.9632	7.33451	6.53723
Apeh	7.6314	7.57378	8.1811	7.00186	7.71489	6.95323	6.97457	7.74852	8.28826	7.86031	8.71191	7.68689	8.02014	7.12501	8.31197	8.04256	8.28037	8.47142	7.84769	8.22905	8.26749	8.86331
Apex1	10.5863	10.5097	10.4739	11.2537	10.5263	10.9261	10.9611	10.7331	10.2644	10.3897	9.90823	9.47576	9.83536	10.5586	10.1516	9.93732	11.0204	10.8064	11.223	10.2963	10.5122	10.4051
Apex2	7.53027	7.83158	6.76523	7.77243	6.96927	6.21783	7.41878	7.3773	7.97628	7.26722	6.84959	7.29477	7.28434	6.65098	6.96543	6.63579	6.92646	6.53016	6.97614	5.81753	6.09539	6.46371
Aph1a	6.02684	6.14637	6.35677	5.65081	5.62549	5.49019	6.04855	6.35382	5.86467	5.87539	6.0654	6.09274	6.43009	5.78035	5.57094	5.88722	5.40436	5.65102	5.31944	5.70052	5.62248	6.05645
Aph1b	3.86041	3.8559	3.90442	3.90536	4.88062	4.87745	3.85868	3.71559	3.71844	4.06569	4.98686	4.80476	5.26184	3.96118	3.7128	4.55288	3.81994	3.70785	4.29339	4.7567	3.90257	4.01965
Api5	10.4956	10.6188	10.5666	10.8944	10.6186	10.9528	10.6881	10.7064	10.3516	10.6795	10.4899	9.6649	9.28055	11.1984	11.2448	11.3505	10.6497	11.043	10.8641	11.5391	10.9858	10.4408
Apip	8.71803	8.16841	8.17085	8.59481	8.65237	8.88863	8.34466	7.97143	7.04866	8.11706	8.03213	8.63603	8.52226	9.0018	9.1643	9.07582	8.38683	8.62272	8.62705	9.14024	8.87397	9.01819
Apitd1	7.10919	6.57138	6.83157	7.29737	7.10143	7.79356	7.61142	7.16321	6.75054	7.2019	6.6656	5.54086	6.0164	6.93979	6.78495	6.72538	7.09188	7.1417	7.37559	6.93821	6.65739	7.13991
Aplf	6.28559	6.21827	6.36193	6.42115	6.60131	6.95411	6.35048	7.07386	6.54429	5.82075	5.94221	6.3779	5.96738	7.06498	6.41206	6.1572	7.00961	7.06992	6.61403	7.37396	6.99444	7.08603
Apln	6.06943	6.07776	4.70097	6.1332	5.49377	5.73103	6.50252	5.54787	6.03104	5.98663	3.64308	3.64112	3.654	3.6278	3.65539	3.64057	3.64441	3.63436	3.89645	3.6693	3.69676	3.69879
Aplnr	11.3198	11.196	10.4365	10.6562	10.4411	10.5017	10.2753	11.4466	11.0223	10.9338	3.09854	3.99064	3.21963	4.1364	7.13399	8.98246	3.114	2.99144	4.95767	3.94091	3.60152	6.00673
Aplp2	11.6032	11.693	11.9598	10.7891	11.0925	10.8799	10.9429	11.4314	11.2759	11.2003	12.2366	11.9014	12.0467	11.3736	10.9956	11.6686	9.17592	10.3308	10.3658	9.94339	8.6511	9.20357
Apmap	8.54393	8.45799	8.5018	8.24653	8.66608	7.89256	7.88822	8.50821	8.74614	8.75921	9.2205	8.78597	8.49341	8.74112	8.04485	8.57804	8.36154	8.71259	8.14711	9.04617	8.7849	9.03208
Apoa1bp	8.62383	8.90525	9.20676	8.82989	8.48533	8.65242	8.73171	8.87452	8.99893	9.01319	8.80442	8.93144	9.16815	8.89091	8.38615	8.96699	8.63757	8.46119	8.95938	8.89733	9.306	9.09686
Apobec3	7.78032	8.12674	7.26928	5.96838	6.82989	6.03834	6.84296	7.50942	6.20262	7.10118	8.16439	8.16883	8.70963	7.15343	8.12243	7.96043	8.62833	8.2476	7.43499	9.11005	9.3581	9.75504
Apobr	3.34264	3.54239	3.76245	3.33884	3.34117	3.33884	3.33656	3.33942	3.34066	3.34085	3.33694	3.55608	4.06944	3.5463	3.92136	3.98643	3.80536	3.6731	3.77126	3.74636	4.00862	4.18709
Apoe	9.68698	9.49415	10.2714	10.009	10.619	10.4038	10.4818	8.55162	8.7613	9.8732	11.1699	10.4702	10.9773	11.3306	10.4275	10.5642	11.9345	11.8105	12.0508	12.0357	13.8917	13.4309
Apold1	8.53202	8.19843	8.61349	6.41004	5.76079	5.53538	6.85046	7.82678	7.8359	7.03817	6.51321	5.63761	3.79461	3.5756	4.97825	4.8923	4.53045	4.01282	5.34724	3.73854	3.83265	5.18239
Apoo	5.73952	5.68615	5.76707	5.38043	5.47565	5.56612	5.72601	5.43176	5.63665	5.96252	5.70397	5.61616	5.74467	6.65408	6.80256	6.70949	6.3078	6.56693	5.89411	7.07786	6.5811	5.45223
Apool	9.15504	9.01599	8.88481	8.8453	8.37082	9.41036	8.64931	9.07739	8.66246	9.37908	9.10022	8.56971	9.57432	9.82938	9.67076	9.35672	8.54719	9.24962	9.18006	9.73484	9.09561	8.79157
Apopt1	7.77755	8.00893	7.73476	7.80603	7.90901	7.98204	7.8404	7.57519	8.30219	7.92708	7.66449	8.12646	8.22823	7.73866	7.9267	7.99614	8.05799	8.4696	8.21019	8.60932	8.26862	8.28338
App	9.3302	9.85166	9.81142	8.98132	9.23545	8.86938	9.39466	9.52564	9.28037	10.1467	11.1685	11.0994	10.5302	10.4529	10.9417	10.955	7.86685	7.54063	8.66922	7.99247	8.72568	7.79965
Appbp2	7.53487	8.06975	8.75394	8.60475	8.78118	9.02808	8.48487	7.92626	8.78758	8.95807	9.04022	8.45749	8.41693	8.98619	8.83716	8.67124	8.45888	8.55153	8.16537	8.22501	7.68939	8.74932
Appl1	8.51924	7.87416	9.14192	8.32209	8.57223	8.94773	8.45971	8.61922	8.3486	8.42373	8.19304	8.49561	8.97809	9.17887	9.03385	8.43693	8.29698	8.38832	8.58847	8.49403	8.96376	7.15041
Appl2	7.42073	6.87781	7.50232	6.33083	5.96358	5.9715	6.19667	7.1845	6.77814	6.75282	7.92189	7.56206	7.58872	6.93833	6.66963	7.10053	6.93044	7.13718	6.1734	6.63784	6.87962	7.352
Aprt	10.3715	10.4794	10.8637	10.3853	9.87026	10.3944	10.4782	10.5371	9.90288	10.5735	9.84924	10.6428	10.0347	9.80822	9.66884	9.88499	9.92604	9.61904	9.90282	10.115	9.86058	10.5153
Aptx	6.87984	7.13139	6.49073	7.12654	7.05014	6.7307	6.7622	6.12651	6.22575	6.68634	5.90953	7.03186	7.13623	7.20166	6.92447	6.4722	6.50574	6.80681	7.00733	6.9414	6.61726	6.85235
Aqp1	4.76673	5.02914	5.14769	4.91528	5.60603	4.19057	4.57946	4.83466	5.13374	4.2022	6.6588	6.17548	5.69031	5.98938	5.9041	6.04645	4.79417	4.33193	5.15839	5.02136	4.21287	4.21417
Aqp11	4.74395	5.62113	5.02357	5.07036	4.8782	4.57397	5.11491	5.167	4.76115	5.00514	5.47638	5.82296	5.6388	5.08519	5.0273	5.66714	5.19903	4.6123	4.82342	5.95619	5.41941	4.92209
Aqr	8.3896	8.3135	8.30043	7.36879	7.87725	7.53529	8.32985	7.57839	7.80763	8.35669	7.45095	6.95075	7.37247	8.04578	7.35096	7.48934	8.38669	8.29499	8.24379	8.62599	7.98993	8.38387
Araf	8.61707	8.86153	9.24652	9.19378	8.58508	8.82889	8.87655	8.87091	8.75586	8.70097	9.37806	8.57765	9.19002	8.81959	8.31706	9.11557	8.75905	8.64232	9.03821	8.45619	8.32826	8.54962
Arap1	6.04909	5.33998	5.74384	4.7939	5.18679	5.36819	5.22169	5.55347	6.98601	5.36469	5.21039	5.94381	6.63008	5.35745	5.87624	6.61207	6.80058	6.06686	5.62521	5.76125	7.00941	6.74166
Arap2	4.25529	4.02034	3.71291	4.19413	5.06917	5.08793	4.62119	5.41074	4.26459	4.63559	3.71125	3.71072	3.71421	4.40638	5.15453	3.71057	3.7116	3.73593	3.9244	3.71846	4.41233	4.0389
Arap3	9.1764	9.48356	9.53376	8.78227	9.3723	8.19653	8.82912	9.5423	9.27736	9.53452	9.39992	9.71665	9.61064	8.7562	9.6652	9.57528	7.44929	7.01528	8.26425	7.18401	7.91484	6.46458
Arcn1	10.5873	10.6499	10.5714	10.8596	10.7308	11.0854	10.8901	10.5622	10.4723	10.8851	10.6378	9.94214	9.65166	11.2301	10.4282	10.4928	10.5273	10.6521	10.6215	11.1187	10.8347	10.4131
Arel1	6.22115	6.59863	6.52549	6.77742	6.00224	6.08958	6.76776	5.69442	7.0766	5.74856	7.48826	6.92783	6.3474	6.76694	6.68435	6.76823	6.07211	6.27843	6.38127	6.90915	6.70159	6.18941
Arf1	11.6631	11.7746	11.7267	11.5139	11.4985	11.2914	11.6078	11.66	11.5693	11.7859	11.4985	11.083	10.7831	11.2188	11.4522	11.5585	11.4644	11.2892	11.3572	11.2977	11.3112	11.5734
Arf2	9.31416	8.70431	9.10698	8.73658	7.84837	8.84472	8.66535	8.22	8.55121	8.22515	8.30374	8.32135	8.18827	8.31647	8.07952	8.31543	7.09728	8.161	7.91781	7.90624	8.04291	8.53034
Arf3	6.68535	7.02527	7.46358	7.30899	7.59435	6.86729	7.16735	7.38333	6.7051	7.07842	7.34697	7.15091	7.44093	7.6288	7.23023	8.00396	7.39871	7.33607	7.1203	6.96101	7.72646	7.96205
Arf4	12.3116	12.0778	12.5015	11.9277	12.0223	12.1065	12.0693	11.9711	11.5486	12.4605	12.2835	12.76	12.5699	12.9579	12.8294	13.3214	11.7043	12.5212	12.1539	11.9154	11.1403	10.7952
Arf5	8.19899	8.66808	8.74353	7.90847	8.21368	8.53598	8.25124	8.07379	8.40724	8.88674	8.82707	8.35405	8.77436	7.76992	8.46982	8.58958	8.35528	8.47514	8.14577	7.51233	7.97305	8.0179
Arf6	6.67806	7.15819	7.08375	7.63392	7.36593	7.88984	7.80515	6.8925	7.20073	7.12111	5.79697	7.13972	6.87694	7.88566	7.58387	6.7072	7.1609	7.42628	7.4168	7.30417	8.07285	7.45067
Arfgap1	7.5674	7.02413	7.39489	6.45059	7.00879	6.87778	6.85522	7.59246	7.6104	7.6518	7.77319	7.46052	7.5457	6.7985	7.58243	7.54547	7.56932	7.20476	7.02684	6.80947	6.22715	6.98967
Arfgap2	5.5568	6.21395	5.61765	5.75166	5.92264	5.86576	5.52031	5.80115	6.45445	5.56191	5.40824	5.32942	5.33378	5.31135	5.18313	5.69665	6.27535	6.19591	5.31004	5.90378	5.5604	6.1271
Arfgap3	6.32032	6.34937	6.70656	5.48981	6.14079	5.09533	5.5769	6.37957	5.22892	6.20347	7.10237	6.1256	7.41352	6.61277	6.42614	5.9003	5.94678	5.76945	5.77927	5.45121	6.12818	6.18446
Arfgef1	7.64925	7.50355	8.57408	8.66741	8.23049	8.80733	8.85766	8.51598	8.31408	7.50654	8.20966	8.96761	9.03677	8.90725	9.37021	9.33085	8.08048	8.89309	8.38479	8.84215	8.36906	7.19762
Arfgef2	6.83734	7.2776	6.46583	6.45206	6.8908	6.77024	6.3553	7.03247	6.10128	5.72083	7.12401	6.92963	6.62667	6.75327	6.78782	6.90935	6.20861	6.17992	6.63687	6.55729	6.56188	6.04945
Arfip1	8.64197	8.74269	7.71324	7.94045	7.76308	8.07112	8.28105	7.88108	6.59159	7.91421	8.39294	8.69144	8.35371	8.20011	8.29244	8.93571	7.47726	7.73609	7.99192	8.20228	7.87882	7.54798
Arfip2	6.84158	7.0969	7.11693	6.29051	6.34283	5.34595	6.72639	5.70006	7.65204	6.99977	7.9836	7.56979	7.91183	6.94365	6.82462	6.70991	6.94319	6.61254	6.13192	6.84299	6.99727	7.09465
Arfrp1	8.38005	8.41448	7.97538	8.08468	7.82906	8.25694	8.08604	8.80636	8.70991	7.56351	7.63815	7.38564	7.79817	8.12223	7.94492	8.31678	8.41009	8.09776	8.12431	8.25302	8.38712	8.39819
Arglu1	10.2571	10.1465	10.2939	10.6629	10.593	11.7323	10.3927	10.2337	10.6317	10.238	10.5354	10.7295	11.0762	10.7007	10.6732	10.4734	9.89941	10.025	10.6519	9.85728	10.0059	9.75538
Arhgap1	9.42756	8.95411	9.66344	8.70658	9.18348	8.51302	8.89257	9.43332	8.84364	9.13311	9.35945	9.29623	8.92474	8.38742	8.65968	9.03149	8.97145	8.63183	8.39669	8.68882	8.82452	8.89523
Arhgap4	3.30551	3.90772	3.27271	3.40772	4.0506	3.28129	3.2658	3.67591	3.29311	3.29428	3.26844	3.26707	3.27605	3.84082	3.84822	4.50943	4.95525	4.6337	4.09039	5.1562	5.63133	5.64644
Arhgap5	8.56478	8.43788	8.52925	8.16596	8.35816	8.68415	8.76275	8.41135	8.06199	9.2151	9.25731	10.0237	9.3975	8.42411	9.07588	9.2838	6.65945	7.87873	8.29128	8.24694	8.51286	7.10611
Arhgap6	5.05393	4.33841	4.32431	4.42942	5.13529	4.91392	5.95166	4.99558	4.60405	5.26475	5.24465	5.24318	4.84796	6.49834	4.93201	6.42428	6.89505	6.62583	5.8062	6.34655	6.67394	6.09672
Arhgap8	3.79677	3.79615	4.0711	3.489	3.92958	3.489	3.48604	3.48974	3.49136	3.4916	4.24582	4.44274	4.41226	3.79005	4.30826	4.39408	3.67626	3.87014	3.86544	3.49008	3.64386	3.49432
Arhgap10	5.27324	5.13426	4.94031	4.74636	4.96405	4.45888	5.06926	5.13149	5.33847	5.40134	4.49739	4.64149	4.26297	4.4515	4.31984	4.54271	4.8507	5.11498	4.64723	5.13408	5.38029	5.27428
Arhgap11a	7.02613	6.36753	5.32897	6.8328	6.25548	7.16167	6.59528	6.67075	7.35303	5.97582	4.75651	5.84906	6.69916	7.38919	7.21731	7.2742	7.42774	6.78952	6.7619	7.2326	6.62906	6.66811
Arhgap12	7.90977	7.96327	8.75487	7.9901	7.45871	8.40701	8.10039	7.70512	8.90127	8.74883	9.11013	9.08148	9.67213	9.0078	9.27704	8.46236	8.04551	8.72149	8.54357	9.32283	8.76992	7.88492
Arhgap17	6.99212	6.68837	7.26912	7.33953	7.07395	6.96507	6.77517	7.2828	7.42469	7.52228	6.89061	7.28268	7.55715	6.3052	7.22087	7.00891	7.19196	6.99027	6.5597	6.68564	7.36076	7.77436
Arhgap18	10.9547	10.5931	10.6135	10.3668	9.50178	10.1358	9.99229	10.345	9.74328	10.5468	8.0573	8.28914	7.78958	9.54345	8.62889	9.64406	9.18597	9.33595	8.92154	8.6418	9.59586	8.59594
Arhgap19	6.98971	6.49844	6.21344	7.30336	7.11051	5.33266	6.97494	7.47948	7.43358	6.62736	4.50667	5.57421	6.16407	7.03174	6.93438	4.50068	7.25916	6.35288	7.62308	7.42346	7.98023	8.19793
Arhgap21	6.81197	7.65478	7.02337	7.38884	7.25787	7.45875	7.36397	5.85297	7.58604	7.49409	7.18546	7.63259	8.29887	7.91363	6.95287	6.61524	6.78464	7.29883	6.62894	6.74243	6.9022	6.96384
Arhgap23	5.57843	6.06476	5.57473	5.67579	5.59371	4.82277	5.49655	5.47036	5.91284	5.1502	5.98841	5.45406	6.01222	5.44986	5.42351	4.99814	5.04923	5.22343	5.56711	4.97193	5.61341	5.80582
Arhgap25	7.81887	7.43455	7.03597	7.06566	7.08556	7.10755	6.9683	7.31675	7.67076	7.6578	7.61029	6.88707	6.6106	7.22013	6.46217	7.8879	7.30687	6.8917	7.33872	5.83779	7.9448	7.81288
Arhgap26	5.06914	6.09568	6.0319	5.91094	5.34737	6.29689	5.87893	5.99936	5.26043	6.5147	5.30092	5.70016	6.17665	5.43186	5.86926	6.07841	4.61315	4.57467	5.50583	5.37007	5.03868	5.72573
Arhgap27	8.04681	7.47015	6.93686	6.96129	6.91395	6.70407	7.00226	7.6287	7.96965	7.89177	7.54166	7.43037	7.36797	6.21307	7.58977	7.08104	6.16954	6.54483	6.64354	6.0835	6.48751	6.61274
Arhgap28	8.72466	8.92928	8.88595	9.19222	9.19558	8.69638	8.79958	8.71014	8.75044	9.40656	9.2919	9.42448	9.43956	8.74139	8.9109	9.56428	7.48063	7.70034	8.79562	6.21871	6.29456	5.35786
Arhgap29	9.8659	10.2456	10.2923	9.54553	9.94554	9.70308	9.6471	9.38129	9.53092	10.123	10.2686	10.0148	9.94597	10.272	9.68364	10.2137	7.37206	7.61299	8.73691	7.40085	6.66536	6.87907
Arhgap31	8.83335	8.95465	8.65339	8.33676	8.59663	7.79243	8.27393	8.43355	8.7832	8.86661	8.428	8.36234	7.831	8.29873	7.50786	7.7795	6.25117	6.39941	7.40399	5.32808	6.88098	6.67937
Arhgap32	5.08906	4.62723	4.77608	4.17932	4.75621	3.83798	4.36117	4.83996	5.03831	4.18986	4.65483	4.93421	3.89453	4.04986	4.00193	3.90641	3.83429	4.18325	4.07839	4.13415	3.846	3.84648
Arhgap35	6.6162	7.11434	7.05789	7.30431	7.48567	7.6125	7.16292	6.41958	7.377	7.08546	7.17301	7.03613	7.49925	7.00622	7.27045	7.2694	6.75601	6.98099	6.74602	6.5237	5.61109	4.99623
Arhgap39	4.81734	4.39222	4.7435	4.09142	4.44213	4.03743	4.09471	4.48076	4.10442	4.6014	4.66467	4.8013	4.75174	4.36147	4.38768	4.77144	4.43528	4.52933	4.19367	4.73008	4.92295	4.82999
Arhgap42	6.84494	6.09961	6.831	6.56076	6.66045	6.84643	6.33782	6.57938	5.90335	6.90805	6.96756	6.63429	6.26396	7.11155	7.22248	6.92768	4.92978	6.06371	6.98832	5.1708	4.98702	5.69517
Arhgap44	5.93172	5.87709	5.27833	5.39269	5.58039	6.13129	5.68558	6.10547	6.53966	5.88155	6.53935	6.61541	6.43828	6.2902	6.87567	6.08293	5.24733	5.28968	6.18919	4.60248	4.89653	4.62655
Arhgdia	11.1251	10.922	11.0745	10.3819	10.7009	10.2507	10.6115	11.2045	11.5464	11.251	10.4241	10.5691	10.4938	9.66429	10.1954	10.5581	10.9641	10.6785	9.77963	10.3035	10.8778	11.2788
Arhgdib	8.73802	9.42555	9.23523	9.31363	9.49068	10.2346	9.44816	9.16863	8.98161	8.86988	9.03084	8.91747	9.44703	10.511	9.60434	10.129	11.0808	10.923	10.998	11.9956	12.2754	12.2403
Arhgef1	8.65524	8.46277	8.53448	7.72802	8.12152	6.90614	7.56685	8.40031	8.66454	8.64171	8.85348	8.94683	8.61086	6.76701	8.66883	8.65478	8.73482	8.51373	7.4445	7.43853	7.83927	8.40369
Arhgef2	8.13126	8.65535	8.72053	7.2687	7.98407	7.08719	7.89263	8.59261	8.14858	8.37647	8.59071	8.5466	8.82205	7.842	8.44094	8.82629	8.37821	7.78128	7.7877	7.37208	7.83566	7.67462
Arhgef3	7.73656	8.10432	7.53278	7.60218	7.58231	6.42684	7.34325	8.54059	7.12776	7.50529	6.78592	7.02422	6.09108	6.50114	6.59657	6.92098	6.61112	7.2964	6.36515	6.21007	6.90199	6.40515
Arhgef5	6.76817	7.74853	6.70436	6.08872	6.795	6.55461	6.17802	7.16771	6.63716	6.98987	7.17065	7.49028	6.57526	6.34077	6.20385	6.18368	4.84446	5.80195	6.03157	4.61024	4.65139	5.5755
Arhgef6	3.07899	3.01804	4.86121	3.00502	3.05186	3.00506	2.95326	4.98577	3.04209	3.04566	2.96238	4.41841	3.1026	3.77115	5.04512	2.95635	5.18158	5.3532	4.67099	6.85272	6.92376	6.58077
Arhgef7	8.55023	8.30789	8.87925	7.96371	8.28076	8.20041	7.74894	8.74637	8.56051	8.62876	7.49589	8.35016	8.44332	7.64941	8.03877	7.44529	7.79246	7.32861	7.67061	6.83178	7.38327	7.73659
Arhgef9	7.29068	6.41813	6.80953	6.87787	6.78625	6.71116	6.59873	6.62777	5.66661	6.84686	6.39007	6.90553	6.86217	6.78769	6.87165	6.8392	6.4344	6.72737	6.63567	4.79689	5.39948	4.83418
Arhgef10	5.65816	5.63474	5.89003	5.42955	5.99067	5.28062	5.32298	6.15974	5.88854	5.95021	5.52442	6.5635	5.2811	5.79438	5.72204	5.37843	5.1759	4.64772	5.20587	4.5374	4.55165	5.15172
Arhgef10l	3.35302	3.34979	3.34786	3.45137	3.68018	3.64159	3.57758	3.37822	3.35101	3.7561	3.36876	3.46492	3.34836	3.9396	3.99265	3.62664	3.62415	3.78971	3.52057	3.91898	4.17665	4.26853
Arhgef11	4.99018	4.10449	4.71201	4.18837	4.79168	4.3873	4.36306	5.63723	4.90961	4.62889	5.1403	5.47563	5.06242	4.08765	4.5871	4.12735	4.53125	4.18044	4.28241	4.035	4.67739	4.59047
Arhgef12	7.33837	7.86838	8.07829	7.63784	7.61717	7.67591	7.67887	7.73336	7.49198	7.30283	7.38976	7.64144	8.12667	7.91272	7.44405	7.47135	6.07187	5.94633	7.05793	5.88223	5.17388	5.55949
Arhgef15	8.55251	8.53627	8.57259	8.3936	8.10433	8.30197	8.4478	8.86446	8.97205	8.59977	8.89869	8.85247	8.7922	8.14828	8.30015	7.90257	4.23943	5.12369	7.05044	4.18232	4.32521	4.33508
Arhgef17	6.62513	5.9737	6.18587	5.72142	6.41304	5.94001	5.26272	6.24628	6.19273	6.16178	6.77574	6.15584	6.93237	6.1921	6.29779	6.65535	6.03483	5.13961	5.91901	5.27553	4.79992	5.25045
Arhgef18	5.04863	5.19418	4.75523	4.63709	5.19925	5.41007	5.19512	5.6091	5.76628	5.11777	4.69888	5.46636	5.46237	5.57475	4.67094	4.95255	5.22108	5.03652	4.94894	5.32396	5.50698	5.30918
Arhgef25	4.54125	4.56253	5.18197	4.94985	4.87356	4.28799	5.14549	5.15012	4.33265	4.29406	5.679	4.94993	4.95203	5.33078	5.28704	4.28141	4.92166	5.34915	4.88372	5.57236	5.29323	5.70226
Arhgef26	4.79396	5.57369	5.76912	4.75403	5.02499	5.51663	6.09996	4.29742	4.40457	6.06082	5.66534	5.60186	5.92199	5.5641	4.19901	6.29933	4.19286	4.9544	4.84693	4.20693	4.22299	4.22419
Arhgef28	7.91496	7.52892	7.92846	6.59518	6.90201	7.23258	6.87851	6.56098	7.20178	7.22507	7.97535	8.22177	8.18481	6.49732	6.39881	6.64896	5.30789	5.42545	5.99326	4.42672	5.11916	4.50366
Arhgef39	7.46051	7.1327	6.59275	6.3172	6.37705	6.23533	5.99905	6.66581	7.35647	7.34892	4.61948	6.66335	5.85544	7.63361	7.32	6.1524	7.79908	7.25876	7.23861	7.98926	8.01573	7.92363
Arhgef40	4.92885	5.76855	5.29336	4.99015	5.48838	4.48818	5.16805	5.1525	5.14333	5.61323	6.14793	5.54419	5.38119	4.62052	5.42256	5.42817	5.09468	4.98104	4.76121	4.7894	5.40745	5.74308
Arid1a	9.10054	9.13413	9.00748	8.93927	9.2869	9.99177	9.13515	9.49629	10.1629	9.76169	9.3771	9.38949	9.41739	9.30454	9.81162	9.48267	9.02291	9.35957	9.44292	9.20449	9.55057	9.27446
Arid1b	6.54543	6.40431	6.368	6.42569	6.69396	6.50143	6.77784	6.5675	6.56849	6.57166	6.72369	6.26014	7.82006	7.07035	6.7578	7.09022	6.85912	6.5069	6.65059	5.89146	6.64513	6.19274
Arid2	8.33668	8.24132	8.25058	8.69126	8.76905	8.88493	8.75658	7.1495	7.90554	8.71736	9.34754	9.6633	9.25501	9.30427	9.33763	8.12419	7.45586	8.2467	8.7037	8.7146	8.55607	8.21913
Arid3a	6.50042	7.22255	6.88782	6.9235	6.85919	5.8076	7.05998	6.77592	7.27449	6.32464	7.00018	6.79962	6.33366	6.40395	6.33561	6.7988	6.17499	7.01673	6.99707	7.11621	7.64271	7.77638
Arid3b	5.01873	5.95242	5.52882	6.62243	6.60054	6.72098	6.40928	5.90137	7.06551	6.63205	6.72791	7.32834	6.54251	6.73089	6.95189	6.68799	6.3549	6.64864	6.37208	6.02722	6.53862	6.50604
Arid4a	7.33519	7.32808	7.07462	7.32631	7.62125	8.23319	7.83832	7.57457	7.46936	7.45031	8.32088	7.88956	7.71667	7.93122	7.86608	8.15716	6.92736	7.73308	7.37943	8.03396	8.07402	8.1633
Arid4b	8.71277	8.55222	8.66293	8.49346	8.82694	8.65865	8.59295	9.00451	8.92527	9.0538	10.4054	9.99946	9.87479	9.89928	9.72752	10.1356	7.63338	9.01075	9.10212	9.37348	9.34672	7.89103
Arid5a	5.0117	5.58606	5.4016	5.05222	4.68314	4.27603	4.71746	4.95713	4.28432	4.28516	5.5906	5.56416	5.27907	4.99304	4.89534	5.58767	5.05902	4.65597	4.83918	5.5498	5.63514	6.68927
Arid5b	7.04125	7.55089	7.27845	7.25052	6.98895	6.47363	7.6041	7.71647	7.69525	6.81935	7.53242	8.26838	8.05292	7.90289	7.52107	7.38684	6.58248	6.37921	7.24587	6.46648	6.24918	6.76593
Arih1	6.91189	7.56589	6.6236	7.64026	8.1107	8.01212	7.20932	7.23337	7.5131	7.20664	8.19283	7.43492	8.14984	8.42518	8.56488	8.60551	7.31205	7.72893	8.10188	7.81258	8.03375	7.43296
Arih2	7.63088	7.35234	7.72642	7.76105	7.17434	7.09487	7.36177	7.28154	7.23253	7.73614	7.10644	7.46478	7.5519	6.79133	7.1028	7.27195	6.648	6.56413	7.41162	7.42951	6.91015	7.58008
Arl1	8.70275	8.65337	8.96749	9.06792	8.94343	9.19743	9.08493	8.75773	8.43294	8.79273	8.64822	8.74948	8.50239	9.06567	8.88471	9.26567	8.59415	8.81613	8.77832	8.83678	8.88673	8.60364
Arl2	8.12852	8.11847	7.43194	7.87062	8.12598	8.47691	7.92488	8.25836	7.81083	7.57869	8.13929	8.02214	8.31998	7.68606	7.55837	7.9656	8.45484	8.17861	8.01419	7.4179	7.64219	7.9159
Arl2bp	6.92852	7.09958	7.07335	7.0954	7.71143	7.84367	7.67237	7.17752	7.58274	6.71779	7.43407	7.46088	6.86558	7.91367	7.27811	7.54506	6.67341	6.53131	7.08111	7.02147	6.88845	6.57652
Arl3	7.1895	6.82225	7.38633	7.62853	7.76371	7.72004	7.70713	7.20692	7.21959	6.6994	6.81019	7.20987	7.34406	6.88031	7.4245	7.12784	6.79105	6.75538	7.4655	6.72542	6.66412	6.34923
Arl4a	8.89013	9.4211	9.23456	8.36247	8.64435	9.48028	8.28142	7.92458	8.70204	8.58567	9.88492	9.29958	9.7824	8.65644	9.0531	9.48315	7.45237	8.38756	8.49018	9.14649	7.61209	8.42142
Arl4c	5.00168	6.04079	4.90567	5.40645	5.56917	4.99898	5.68977	5.70008	6.18856	5.36983	4.65784	5.23077	4.88773	5.78459	5.25227	4.69505	5.10254	4.73402	5.30642	5.41921	5.47743	5.71646
Arl4d	4.48376	4.5252	4.18671	4.38797	3.93848	4.85234	4.8931	4.70013	3.93762	4.32112	4.94428	4.87267	4.54146	4.0477	4.03385	4.718	4.33123	4.11097	4.8382	3.9959	4.01788	3.9415
Arl5a	7.31656	7.74767	7.79666	7.74023	6.97396	8.57233	7.75547	7.40128	7.04804	7.44343	7.4708	6.42425	7.14077	7.45956	7.99833	8.86389	6.9949	8.21718	7.91446	8.18936	7.98995	6.64611
Arl5b	8.5309	8.661	8.66191	8.42093	8.46754	8.53002	8.32322	8.53688	7.68502	8.3015	9.35548	9.11405	8.58466	8.77817	8.56132	8.87614	7.26749	7.85766	8.04174	6.64495	7.81288	7.91164
Arl6	7.28308	7.53657	6.39266	7.73184	7.45729	7.97329	7.72575	7.66279	7.3206	7.90403	8.11055	7.84809	8.44385	8.18066	8.64886	8.26062	7.02987	8.26174	7.35694	7.65825	6.77684	6.54828
Arl6ip1	11.3301	11.3053	10.6161	11.5821	11.5627	11.2426	11.3161	11.2905	11.0324	10.8127	10.8183	10.867	11.2117	12.2357	11.2218	11.2113	10.9991	10.6357	11.7144	11.6962	11.6362	11.4653
Arl6ip4	7.41016	7.61793	7.10241	7.95816	7.63026	7.8039	7.55924	7.2721	7.52129	7.135	7.06459	6.62675	6.73268	7.16022	7.44409	7.12468	7.96047	7.47407	7.4795	7.16166	7.74688	8.30684
Arl6ip5	7.6029	6.61179	7.36372	6.90061	7.0593	7.2216	6.96999	7.5549	7.52766	7.52704	7.88426	7.71647	7.27069	7.05831	6.41712	7.07078	7.36213	7.35619	7.15766	7.2579	7.33818	7.72126
Arl6ip6	8.91444	8.82265	9.38018	9.10257	9.25656	9.73737	9.03747	8.5549	8.76979	9.70654	9.84909	9.89265	8.81896	9.62083	9.56524	9.52063	9.15551	10.2059	9.45792	9.63789	8.68874	8.78181
Arl8a	5.69288	5.61039	5.99033	6.02691	6.29698	5.78146	6.1058	5.55952	6.16131	5.94028	6.12279	5.92813	6.19484	5.90989	6.06705	5.97781	6.08682	6.27682	5.93165	5.44746	5.97523	5.97261
Arl8b	9.78955	10.1923	10.299	9.77363	9.73071	9.27281	9.99815	10.2995	9.38036	10.5315	10.7754	10.3137	10.0638	10.5588	10.629	10.6288	9.6805	10.215	9.94951	11.3526	10.8642	10.4465
Arl10	3.61153	3.76407	3.69127	3.59277	3.73935	3.49338	3.4869	3.45294	3.6882	3.85543	3.96187	3.59683	3.70629	3.58801	3.44618	3.40184	3.76605	3.86738	3.6145	3.628	3.55913	4.0212
Arl13b	6.50037	6.73585	7.16141	6.32675	6.70623	6.46805	6.42248	6.76695	7.2875	6.24397	6.55764	6.41468	6.88634	6.99462	5.05443	7.20367	6.15915	6.57921	5.92508	5.7244	5.95469	6.44445
Arl14ep	8.52388	8.18678	8.99698	8.56581	8.74778	9.32438	8.60774	8.87616	8.46387	8.61816	8.23815	8.62849	8.53822	9.19274	8.27859	7.81024	7.88806	9.07313	9.00446	8.41324	8.26485	8.01551
Arl15	6.18183	6.32333	6.34736	5.77298	6.10542	5.71678	5.7113	5.9886	5.22455	6.50869	6.43787	6.81061	7.02512	6.38181	6.21898	6.20611	5.26477	5.45401	5.81286	5.69128	5.72236	5.98649
Arl16	7.57475	7.67857	7.44128	7.4616	7.98934	6.43613	7.65644	7.17242	7.47651	7.55363	7.91494	7.52135	6.80347	7.71189	6.98387	7.22978	7.61835	7.07405	7.4211	7.43971	7.6967	7.72069
Armc1	8.85839	9.08707	8.99878	9.52023	9.14292	9.23762	9.27875	9.45066	8.61327	8.5522	8.2486	8.19466	8.97085	9.33182	9.43041	8.80851	8.69809	9.13659	9.27913	9.82706	9.20366	8.7466
Armc5	5.27945	4.73756	5.37248	4.84167	5.24202	4.91571	4.49517	5.48511	5.84236	5.22596	5.59173	5.16461	5.32141	4.56121	5.9836	5.34567	5.45165	4.60137	4.70448	4.67039	4.86524	4.54754
Armc6	5.66622	5.81378	5.02143	5.62452	5.61406	5.2575	5.13892	5.57994	6.08595	5.67833	5.26026	5.42257	4.68833	5.1314	4.54633	5.00934	5.74732	5.54055	5.31161	5.41491	5.6836	5.17978
Armc7	4.86289	5.72641	5.57057	5.04414	5.49087	4.37935	5.20024	5.57442	5.27608	4.42797	5.14321	4.37183	5.60314	5.04085	4.63025	4.42503	5.39084	5.57678	5.33006	4.88216	5.78022	5.49325
Armc8	8.85469	8.52781	8.55565	8.67791	8.34226	8.57042	8.26317	8.71753	7.93177	8.52609	7.95832	8.20588	9.2001	8.45566	9.39931	9.19464	8.39582	8.13315	8.04278	8.32835	8.26089	8.27549
Armc9	5.58068	6.06658	6.02213	5.95614	4.90401	5.54995	5.40445	4.66747	6.12951	5.61438	5.82005	4.8418	5.77671	5.37418	5.84013	5.55687	6.0381	5.79241	5.22823	5.7969	5.09957	5.66153
Armc10	8.60848	9.04751	9.2476	8.25168	8.53596	8.32475	8.65435	8.94099	8.45009	9.19242	9.36708	9.50524	9.33426	9.58249	9.8037	9.74013	9.0053	9.65651	9.24556	9.4393	8.64651	8.14037
Armcx1	9.00073	8.8681	8.61565	9.04132	8.56162	8.8109	8.79173	8.58287	8.99957	9.22564	9.49719	9.34957	9.93454	9.45892	8.90874	9.11998	7.56525	7.36368	8.66563	7.14108	6.09052	4.58265
Armcx2	8.78058	9.11572	9.08308	9.36151	9.31707	8.7306	9.20455	8.57132	8.85642	9.38564	9.27609	10.1391	9.58103	9.45517	9.61015	10.4211	7.61094	7.68671	8.39303	7.08019	7.05396	6.72282
Armcx3	7.66912	7.76553	7.4342	7.50723	7.52353	6.99038	7.54758	7.37994	6.96696	7.40503	8.09445	7.454	7.30007	8.05204	7.77633	7.95341	7.45659	7.4767	7.53873	6.32598	6.75176	6.15011
Armcx4	7.71688	8.54241	8.19008	8.62564	8.54891	9.19441	8.71247	8.44124	8.29092	9.00445	9.88574	9.70642	9.90684	9.73665	9.71969	9.20897	7.0346	7.83018	8.05936	7.02507	6.45227	5.37597
Armcx5	5.10748	4.58592	5.07201	5.29386	5.03033	5.44138	4.82585	5.24285	4.40307	5.844	5.04607	5.29729	4.55855	5.86098	5.02716	5.43831	5.4638	4.98961	5.40013	4.78954	4.83046	5.09912
Armcx6	5.19663	5.45112	6.06134	5.26626	5.78102	5.4006	4.79294	5.95362	4.88954	5.85954	6.21312	6.15887	5.66599	5.28632	5.93475	5.60759	5.69959	5.36043	5.42439	4.89005	4.57749	5.15671
Armt1	7.05073	7.17127	7.36447	7.34825	7.0834	5.92859	7.39622	7.10077	7.79996	6.96231	6.37922	7.18647	6.43745	7.18192	7.04924	7.00428	7.94769	7.84161	7.68935	8.64305	7.89346	7.67635
Arnt	6.84111	6.6645	7.2464	6.41033	7.05833	6.95699	6.46553	6.94856	6.92572	7.24023	6.53821	7.19297	7.25324	6.81712	7.3256	7.13267	6.38263	6.90051	6.68235	6.80442	7.07812	6.3095
Arntl	5.71236	5.68672	5.32333	5.04412	4.63215	5.77093	5.21601	6.1132	4.40871	5.72717	5.62854	5.84947	5.6959	4.36678	5.81185	4.37721	5.73806	5.76133	5.53765	7.45316	6.50588	5.88452
Arntl2	3.6527	4.33219	3.6415	3.89127	4.00572	3.64434	3.83399	4.5642	3.64836	3.69136	4.77062	5.1613	3.96589	4.63581	4.85046	4.96472	3.6404	3.63815	4.3556	4.23422	3.65288	3.65339
Arpc1a	9.08754	9.33277	9.18522	8.98945	9.17829	8.99865	8.62803	9.54383	9.2352	9.17779	9.08171	8.83892	8.9659	9.24428	8.98569	9.23996	8.98555	9.18006	9.11313	8.33223	8.58576	8.60189
Arpc1b	9.87283	10.1961	10.0952	10.499	10.1919	10.2362	10.6567	10.4084	9.93922	10.2614	10.621	10.3872	9.52745	10.2133	9.70477	9.9242	11.0284	10.8413	10.7234	9.88074	10.6288	11.262
Arpc2	11.662	11.3571	11.6362	11.5565	11.5196	11.8517	11.6069	11.4189	11.5205	11.6171	11.4534	11.4553	11.1974	11.9818	11.8994	11.8406	11.9044	12.3115	11.7331	12.6539	12.4674	12.0161
Arpc3	9.94954	9.69369	9.79896	9.89833	10.0736	10.1623	9.89283	9.54078	9.14105	9.49298	9.24315	8.99948	9.21747	9.53386	9.04514	9.26635	8.97515	9.15061	9.66927	9.5927	9.52012	10.1271
Arpc4	9.94996	9.52396	9.77347	9.55094	9.60648	9.61661	9.81472	9.5042	9.46589	9.54509	9.69249	9.44743	9.41216	9.13885	8.74248	8.88558	9.89075	9.28298	9.48236	9.35602	9.93017	10.2628
Arpc5	11.469	11.4325	11.5151	11.5813	11.3957	12.1576	11.6723	11.3004	10.9898	11.4179	10.9457	10.9419	11.0324	11.366	10.6956	10.9943	11.1064	11.2115	11.5392	11.7622	11.7985	12.1563
Arpc5l	9.43019	9.26826	8.91716	9.20455	9.33268	9.54579	9.39744	9.42258	9.02991	9.40191	9.50328	9.43585	8.98097	9.3348	9.58872	8.99556	9.17331	9.48703	9.34212	9.90991	9.11335	9.13158
Arpin	5.5213	5.86834	6.51768	5.96439	5.48138	5.98004	6.26339	5.76818	5.83177	6.02958	5.36823	5.61248	5.22778	5.09595	4.98155	5.1854	5.34244	5.44311	5.16958	4.77681	4.53789	4.53899
Arpp19	10.6408	10.7426	10.657	10.761	10.7872	11.4314	10.9509	10.3328	10.9191	11.0769	10.9088	10.5822	11.074	11.2323	11.4911	11.2372	10.834	11.5746	11.1807	10.7767	10.8582	10.1888
Arrb1	5.91684	6.43803	5.87072	5.96071	5.75292	5.17153	6.50637	6.60141	6.39694	5.33282	7.08742	6.20014	6.67855	5.7206	5.84404	6.13939	5.71996	5.32184	5.35964	6.03266	5.63415	6.36845
Arrb2	4.28973	4.54502	4.28938	4.88225	4.60588	4.68437	4.55321	4.88353	4.39428	4.36667	4.32062	4.29208	4.80748	4.44631	4.97815	4.60781	4.99028	4.80448	4.9854	4.92864	6.12609	6.01112
Arrdc1	7.23138	7.198	6.94956	5.62058	6.30801	7.57729	5.79072	6.48144	6.84427	6.82684	8.36845	7.9896	8.34209	5.85806	7.06473	7.21186	7.94738	7.6567	7.53006	7.29311	8.24924	8.44784
Arrdc2	4.02344	4.16283	4.1283	3.56158	3.58485	3.47377	3.47049	3.47458	3.47636	4.53196	3.89912	3.56175	3.83106	3.46886	3.47285	3.90152	3.47123	4.06998	3.47095	4.35437	4.1308	4.64304
Arrdc3	9.51063	9.25228	9.50771	8.87605	8.68556	9.81817	8.88487	8.63493	8.95539	9.36251	10.166	9.28371	10.1196	9.94663	10.3328	10.5311	8.13835	9.48209	8.39427	7.23003	8.83024	7.91536
Arrdc4	5.11892	6.05792	5.81644	5.8844	5.16903	5.54909	5.99533	5.02749	5.35177	6.25546	6.37592	6.40284	6.02646	5.85472	5.33334	6.33333	5.7945	6.15905	6.18884	5.19468	6.31312	5.88329
Arsa	6.97035	7.09744	7.23688	6.04668	6.94041	6.25595	5.59447	6.45674	7.11658	6.35931	7.74258	7.19955	7.45732	6.30831	6.44653	6.80704	6.33545	6.53655	6.25134	6.45724	5.52309	6.16777
Arsb	4.72315	3.71219	3.6943	3.70642	3.88386	4.65023	4.84819	4.16493	3.80202	4.77247	5.22575	3.68629	5.25523	4.81533	4.58348	3.93019	5.37968	4.60639	3.84602	6.63153	6.91131	6.73912
Arsk	5.95095	6.22487	6.88739	6.58142	6.04316	7.27458	6.39441	5.53706	6.31381	6.31219	7.1871	6.81488	7.99229	7.38292	7.09681	7.0513	7.2988	6.69525	7.37725	7.2658	7.01767	6.28439
Art3	4.14142	3.84966	4.07658	3.515	3.85246	3.79369	3.92885	4.33555	3.51717	3.51739	4.43292	4.01025	3.92345	3.51092	4.03058	4.24756	4.17973	3.51169	3.53446	3.51599	3.55799	3.5199
Art4	5.02689	4.10112	4.06908	6.14962	4.9531	4.95759	4.27913	4.10032	5.37968	4.12331	6.41996	5.41769	6.38511	6.26625	7.15353	7.58661	7.08565	7.554	6.9328	6.28338	4.15204	6.27918
Arv1	5.59913	5.48391	5.39707	5.66686	5.58972	5.63405	5.54864	5.24093	6.35138	5.36046	5.76616	5.18647	5.22745	5.87189	6.02036	5.23836	6.2016	5.78462	5.58339	5.75373	5.1102	5.17293
Arxes1	7.51106	7.25108	7.37672	7.36199	6.86119	7.60207	7.3986	7.08058	6.87903	6.91847	6.08895	7.42379	5.88902	6.78095	6.52077	7.14599	5.39241	6.2788	6.77753	5.61592	5.72997	4.77458
Arxes2	8.63455	8.84078	9.2429	9.45654	9.21298	9.8551	9.4156	9.24561	8.44009	9.8234	8.75604	8.09297	8.94139	9.54468	9.73964	9.65461	9.02873	9.56391	9.53492	8.94828	8.19387	6.7897
As3mt	8.04091	8.2859	8.01723	7.46745	7.76325	8.42117	7.93039	7.69455	7.48755	7.33973	8.1483	7.8514	7.96005	8.23828	7.08052	7.64127	7.37309	7.7637	8.20079	7.789	8.60589	8.01821
Asah1	9.70098	9.85538	9.88613	9.42205	9.2609	8.8065	8.8309	9.43751	8.93287	9.54659	10.3999	10.4951	10.5856	10.1931	9.59913	10.4843	9.73201	10.0387	9.97755	10.7037	10.8669	10.5498
Asah2	5.17353	5.78009	5.16668	4.67942	5.52016	4.8048	5.3045	4.96859	5.74926	5.61063	6.18388	6.85616	6.03846	6.63197	5.94522	6.8872	4.28836	4.51426	5.09973	4.92786	4.40067	4.73242
Asap1	8.83626	8.2397	8.63526	8.2594	8.23427	7.81499	8.20665	8.14287	8.53903	8.84291	9.04134	8.00971	8.51221	8.14904	8.7063	8.4125	6.99539	7.54171	7.24858	9.1142	8.55736	8.57359
Asap2	6.51291	6.99468	7.72178	6.96944	7.13702	7.10355	6.98945	6.93367	6.09447	7.9582	8.63033	8.28432	8.36088	7.67926	7.8851	7.5306	5.99722	6.56582	6.71887	4.49997	6.05776	4.58567
Asb1	3.63473	3.63005	3.67729	4.28411	4.39347	3.62914	3.62576	4.39094	3.63182	3.63209	4.75113	3.881	4.43835	4.00748	3.62819	3.94324	4.30422	4.31465	4.30198	4.40437	3.78681	3.8567
Asb3	7.81386	7.29324	8.02371	6.97991	7.73114	7.61171	8.16462	7.69248	7.83039	7.71922	7.37421	7.56101	7.17448	8.16936	7.38201	7.24636	7.67048	8.22839	8.08457	8.03068	8.26539	7.44984
Asb4	10.9537	10.6526	10.3959	9.67365	9.89943	10.2239	10.632	10.4871	9.9559	9.63112	9.72928	9.14031	9.04356	10.2203	8.52293	10.2519	5.57476	4.84176	8.35733	9.15381	4.33041	4.3449
Asb6	6.5131	6.83309	6.68695	6.09648	6.16519	6.04643	5.82315	7.05282	7.42005	6.90989	6.76807	6.95353	6.10386	5.95962	6.19097	6.47	6.23802	6.37983	5.30826	6.14556	6.44736	6.42396
Asb7	4.90742	5.35113	6.13971	5.32684	5.41807	5.64391	4.8202	4.67131	4.43781	5.14922	6.1302	6.10421	5.26434	5.84987	5.03983	4.82621	5.09572	5.32946	4.88726	5.52599	4.99468	5.15198
Asb8	7.91017	7.82558	7.4167	8.00923	7.61084	6.54803	7.58195	7.30812	7.98812	7.06071	8.21697	7.75935	7.38354	7.58994	7.87424	7.40572	7.812	7.47134	7.64119	7.55017	8.21244	8.08354
Asb13	4.5633	5.03072	4.21428	5.49046	4.79389	4.21783	5.09024	4.68728	5.12178	5.29504	4.58845	5.4077	4.21565	4.47744	5.00902	5.33584	5.45095	4.83628	5.41983	4.7365	4.7065	4.22916
Ascc1	7.33094	7.22662	7.5771	7.25355	7.23803	7.32435	6.464	7.34379	5.67692	6.07694	7.24798	7.34051	7.53798	6.78399	7.09979	6.85912	7.65206	7.06838	7.15603	7.46865	6.77156	7.79542
Ascc2	6.90025	6.35322	6.7669	5.9451	6.77869	6.23767	5.79854	7.58648	6.9841	6.69416	6.41617	6.66461	5.60975	6.62606	6.43299	6.91174	6.83294	6.88115	6.52358	6.45341	6.44339	6.55906
Ascc3	8.42384	7.67138	8.45739	8.16432	8.06894	8.08929	8.13839	8.5374	6.66318	8.61859	8.61844	9.24902	9.01618	9.24022	8.97647	8.68146	7.63704	7.43153	7.66555	8.70942	8.21534	8.41558
Asf1a	8.98947	9.11558	9.55677	9.4588	9.52349	10.4891	9.87953	9.49687	9.01611	9.48435	9.66692	9.72251	9.66129	10.3663	10.1553	9.76092	9.88187	10.1684	9.8225	10.7826	9.48613	9.75574
Asf1b	9.01353	9.00289	8.28328	9.52639	9.91957	10.3926	9.62832	9.50141	8.27843	9.01134	6.15474	7.39144	5.63656	9.0586	7.96269	7.63952	8.55422	8.48728	9.44912	9.62458	9.45556	10.0452
Ash1l	8.62838	8.13132	8.58074	7.94846	7.97388	8.34951	8.06572	8.89171	8.15414	7.93721	8.73891	9.13045	8.9305	8.50515	8.61643	8.81421	8.05993	8.25749	7.70799	8.48472	8.46321	8.44808
Ash2l	8.38304	8.79408	8.07708	8.84043	8.35274	8.77226	9.17804	8.52067	8.67908	9.0673	8.16275	8.10019	8.4629	8.28832	8.48766	8.61733	8.96235	8.79226	8.64439	8.78739	8.38542	8.67311
Asl	7.2478	7.32028	6.51495	7.01742	7.03971	7.63049	6.98582	7.00071	7.56985	6.33219	7.20407	7.0035	7.60652	6.74113	6.33811	6.25161	7.15063	7.27961	7.19578	7.03159	7.05778	7.64289
Asna1	7.23405	7.28842	7.80652	7.58456	7.39513	6.80453	7.54571	7.82555	7.63217	7.42637	7.33281	7.53528	7.262	6.70689	7.33174	7.38556	7.46857	7.4047	7.28799	6.58766	7.25756	6.9751
Asns	8.82328	8.68416	8.29906	9.61463	9.64048	9.57838	9.60314	9.22484	8.73341	9.05286	7.37535	6.77382	6.6957	8.15749	5.69119	7.00241	8.9014	7.58323	8.75268	10.8112	8.82401	10.6272
Asnsd1	8.43729	8.92358	8.81238	8.70513	8.91444	8.16311	9.26499	8.86775	9.26036	9.21949	9.11492	7.68413	8.01119	9.42755	9.5241	9.45339	9.8463	9.90125	9.09118	10.1771	9.53505	9.24866
Asph	8.50682	8.68629	8.5631	9.10056	8.2579	8.65624	8.79289	8.33359	8.50907	7.7353	8.7888	8.69795	8.90728	9.17342	8.58558	8.99832	8.68157	8.46457	8.46926	8.37037	7.92519	8.45364
Aspm	8.29823	8.02237	7.12517	8.70853	8.16865	7.76331	7.99036	7.96713	7.66605	8.14571	5.1922	6.61509	7.29631	9.2664	8.2836	8.93192	6.84825	6.86233	8.43312	7.99129	7.84418	8.0184
Aspscr1	7.81679	7.70786	7.11914	7.36164	7.41227	7.09836	7.15162	7.77323	7.2741	7.63903	7.78771	7.83006	7.76634	7.14114	7.03267	7.37238	7.92457	7.84737	7.11447	7.1706	7.28967	7.64977
Asrgl1	6.69722	5.92614	6.46212	7.01318	7.16576	6.12926	6.39932	6.54108	6.84388	6.22347	6.48577	5.24918	5.20616	6.30928	6.06376	5.59777	7.49317	6.83221	7.27958	7.35782	6.92679	7.04717
Aste1	6.03796	6.67793	7.14679	6.26948	5.58699	6.44957	6.11358	5.62	5.81427	6.38686	7.18609	6.52249	6.20421	6.26444	6.67395	6.41871	6.63727	7.11106	6.75491	7.00104	6.21362	6.54761
Astn1	5.56148	4.93193	4.24019	5.26932	5.23198	3.80698	4.30585	4.44661	3.98514	4.47571	4.39049	3.72095	5.39718	4.26189	3.76369	4.26515	3.722	3.71881	3.87248	3.73016	3.73955	3.74026
Asun	7.8183	8.10773	8.07459	7.70145	7.68771	7.35427	7.33109	7.66171	7.84207	8.03814	8.33434	7.20419	6.66435	7.75107	7.63359	7.62094	7.78042	8.46799	7.82603	8.20979	7.46374	8.0669
Asxl1	7.73573	8.23899	7.34701	7.42993	7.49977	7.13319	7.67728	7.50139	8.02759	8.02833	8.39013	8.54797	7.90036	6.83084	7.88922	7.53936	7.21829	7.25034	7.20392	7.06422	7.53968	7.95403
Asxl2	7.99449	7.97399	8.32856	8.27815	8.35123	7.70669	8.31166	7.86082	8.54028	7.06834	7.72819	8.86894	8.64784	8.40821	8.79982	8.4958	7.64809	8.60476	7.96523	8.94437	8.03763	8.12059
Asxl3	5.70864	4.4939	4.65291	5.27506	5.39179	5.21763	4.93698	4.84503	4.91685	5.03743	5.48832	4.60218	5.54743	5.35995	4.6771	5.99118	4.89088	5.23549	5.00615	4.29536	4.44126	4.30624
Atad1	9.40792	9.44527	9.1862	8.76415	8.31602	8.99784	9.1089	9.30086	9.05277	9.36954	9.10179	9.79109	9.51816	9.75097	9.45564	9.7364	9.52793	9.65942	9.52463	9.70688	9.46971	8.62806
Atad2	9.87487	9.02954	10.016	9.88242	10.1339	10.1832	10.1605	9.33041	9.21122	9.90853	9.61324	10.1764	9.16872	10.1696	9.81171	9.98246	9.78553	10.1445	10.0545	10.1665	10.0766	9.97869
Atad2b	6.97866	6.86637	7.76631	7.80748	7.43878	6.77405	7.69425	7.67453	7.29275	6.63152	7.95539	8.61952	8.19316	8.73414	8.00245	8.26152	6.94643	7.92808	7.30178	8.1257	7.64793	7.21167
Atad3a	8.69461	8.82849	8.61723	9.02693	8.57718	8.97226	9.25879	9.18009	9.4428	8.75753	8.06308	6.45194	7.62512	8.14926	8.60153	7.6942	9.29815	8.69522	8.78563	8.55494	8.28945	9.34136
Atad5	6.97848	6.76946	7.80347	7.60822	7.68567	7.67513	7.34476	7.56704	7.53947	6.90886	6.38815	8.16389	6.60417	7.77467	7.02351	7.25133	7.33084	7.24909	7.06645	8.32764	7.84223	7.61735
Atat1	6.88327	6.46055	6.6935	6.03282	6.66534	6.22235	6.56558	5.96848	7.00082	6.26636	7.41824	7.01987	6.7117	6.52782	6.50273	7.04462	6.61049	6.38649	6.75524	5.67075	6.16584	6.51591
Ate1	8.56525	8.18202	8.65533	8.37401	8.35518	8.54671	8.39557	8.07158	8.34657	8.81163	8.25409	8.68621	8.4216	8.82097	8.85559	8.53196	8.58217	9.08716	8.11173	8.73761	8.02371	8.34256
Atf1	7.35938	7.06389	6.85193	7.31469	7.45001	7.76736	7.67804	6.99475	7.08156	7.70603	6.23681	7.52069	7.55	7.84048	8.79672	7.22834	7.77995	8.00775	7.73057	8.99768	8.41957	8.30632
Atf2	8.74754	8.61587	8.04064	8.51358	8.61666	7.95198	8.65651	8.20218	7.26468	8.39824	8.98094	8.61937	8.88795	8.91561	8.32016	8.0825	8.38601	8.44419	8.32942	8.76265	8.9531	8.44485
Atf3	7.06268	7.57029	6.94343	7.57656	7.86895	7.49961	7.8765	7.94038	7.75253	7.76642	6.53609	6.16472	6.27698	6.32789	4.00359	7.2247	3.9524	4.84334	6.20564	4.9844	5.42605	9.96278
Atf4	9.77074	9.43186	9.77786	8.73888	9.21617	8.37633	8.8512	9.1479	9.5093	9.38641	8.55572	9.57749	9.13836	8.54256	8.71024	8.47316	9.27902	8.77249	8.35411	9.37459	9.29223	10.1402
Atf6	6.3383	6.35022	6.73421	6.24114	6.44821	5.57584	6.33632	6.29725	6.35995	5.28682	6.56655	7.23968	6.45453	5.71741	4.7773	6.59862	6.26632	5.87792	6.15553	6.94595	6.84341	7.03436
Atf6b	7.04846	7.12579	7.62765	6.71753	6.4693	6.2269	6.98592	7.52339	6.84693	7.25437	7.77104	6.98407	6.96229	5.8057	6.79733	7.03121	7.13081	6.96914	5.88661	6.4355	7.02767	6.86756
Atf7	7.30846	7.21268	6.98152	6.95858	6.68669	6.98965	6.58005	6.38878	6.24169	7.13025	7.19478	7.34419	7.38524	6.69249	6.81821	6.12406	5.75277	5.79083	7.12537	6.48803	6.16145	7.15732
Atf7ip	9.38677	9.09353	8.58187	8.67354	8.43735	8.5286	8.71403	8.65566	9.07619	8.12641	9.42713	8.92364	9.3554	8.9061	8.91757	9.10866	8.31384	8.81412	8.73361	8.44604	8.75946	8.87672
Atg2a	5.28125	5.04737	5.06163	4.52907	4.9767	4.71779	5.34906	4.85649	5.61779	5.40006	5.40305	5.18254	5.6225	5.04921	5.14638	5.29483	5.06851	5.16987	4.71502	4.82562	5.26883	5.0593
Atg2b	6.00214	5.67518	6.4104	5.74535	6.34086	6.31198	5.64388	6.54712	7.39422	5.54844	6.2419	6.97702	6.74972	6.41959	6.65937	6.41494	5.91475	6.22414	6.51609	6.14312	6.18872	6.94146
Atg3	8.51333	8.73294	8.63446	8.75665	8.79452	8.8035	9.08618	8.5674	8.99828	8.58127	8.28216	9.4041	7.4828	8.85313	9.06881	8.53117	8.82604	9.33821	9.30335	9.63256	9.37457	9.37528
Atg4a	4.03995	4.11088	4.03601	4.10635	4.21349	4.21784	4.0643	4.06074	3.95766	4.18668	4.1605	4.02207	3.73687	4.02899	3.96288	3.89742	3.92088	4.04485	4.21089	4.22279	4.1286	3.94786
Atg4b	8.71657	8.71546	8.5187	8.60561	8.31706	8.48687	8.49187	8.45097	7.91508	8.24456	7.98526	8.28542	7.87809	7.94897	7.37846	7.96511	8.30607	8.00722	8.45145	7.81554	7.95159	8.13646
Atg4c	5.47672	5.00669	4.88807	4.78894	5.39919	4.37383	4.46414	5.7585	4.38624	5.87209	4.76201	5.58541	6.29341	4.44096	5.55012	6.46361	6.44439	6.69384	6.07134	5.82146	5.28289	6.31974
Atg4d	4.86844	5.37584	4.34889	4.31108	4.42878	4.91162	4.76389	4.95415	5.52197	5.1081	4.82237	4.41893	4.51263	4.8232	4.79425	5.13385	5.04689	5.10765	4.6732	4.86153	4.68745	5.437
Atg5	8.52776	7.76311	8.5851	9.00856	8.79213	8.36004	8.61944	8.41348	8.89772	8.85811	8.15086	8.60034	8.75148	8.77406	9.17967	8.82942	8.45062	8.95364	8.6188	10.0234	9.25006	8.70544
Atg7	6.83608	6.82195	6.59674	6.38538	6.04073	6.17749	6.33881	6.42138	6.75492	6.8633	6.91989	7.15794	6.0796	5.99563	6.22935	6.7261	6.59899	6.38687	6.41041	6.6355	7.04488	7.34253
Atg9a	5.1081	4.82398	4.30851	4.50305	4.27125	4.13887	4.29821	4.64964	4.63691	4.08984	4.8303	4.96121	4.56235	4.57304	4.80164	4.67091	4.62795	4.6525	4.1647	4.61498	4.5284	4.62167
Atg9b	4.03953	3.84925	3.80692	3.88454	3.8366	3.84203	3.90912	4.09671	3.41023	3.41039	3.5356	3.97812	3.40791	3.48143	3.59428	3.48032	3.52044	3.78991	3.44548	3.40935	3.70506	3.54464
Atg10	5.84049	6.06275	6.52625	6.36585	6.25715	5.46122	6.24833	6.35998	4.87429	5.2544	6.25913	5.80488	6.46029	7.00661	7.33655	6.01197	6.27307	5.73062	6.55323	7.1193	6.8981	6.61591
Atg12	8.28178	9.00629	8.91149	8.6712	8.48664	8.36134	9.03398	7.13865	8.25352	8.06887	9.07897	8.88487	9.10177	9.54023	8.16892	10.032	8.50487	9.40675	8.91817	8.4702	8.22239	8.04354
Atg13	5.97856	6.13588	6.55949	6.40936	6.52863	5.99698	6.55651	6.09784	6.45635	6.77007	5.77804	5.25408	6.54622	6.26035	6.08343	5.64121	6.967	6.56303	5.76037	6.15101	6.39581	6.75264
Atg14	6.60973	5.88815	6.39975	4.89766	5.73225	5.44505	5.92542	6.51976	5.49871	6.06364	5.87308	5.83658	6.71674	5.6646	6.43125	5.56197	6.04762	6.69336	6.11791	6.06163	5.77648	5.28084
Atg16l1	7.21748	6.67548	7.68913	7.3804	7.38932	6.98696	6.98115	7.40749	7.59049	6.83713	6.82398	6.69362	7.4377	6.79745	7.12519	6.73948	7.06906	6.74076	6.95578	6.60474	6.53966	6.84967
Atg16l2	5.02405	5.26184	4.78693	5.03726	4.8278	4.42387	4.52889	5.9547	4.907	5.04012	6.20375	5.64579	5.08522	5.27896	5.62334	5.42571	5.05302	4.97552	5.04034	5.15861	4.92851	5.31539
Atg101	8.34565	8.49156	8.43053	8.6162	8.15064	8.20467	8.72162	8.47366	8.00539	8.30735	8.92638	8.43183	8.57767	8.47936	7.95242	8.44416	8.61858	8.20181	8.64726	7.54502	7.81756	8.02751
Athl1	4.75646	5.02099	5.24602	5.04179	4.39645	5.0419	4.6928	5.23754	5.6828	4.51517	5.31306	6.24552	5.17075	5.18588	5.78479	5.41601	5.71687	5.13601	4.92177	4.68124	5.43932	5.0631
Atic	7.18667	6.5061	7.69591	7.35572	7.60578	6.78656	7.45592	7.26205	7.28709	6.95112	6.35248	6.07654	6.45296	6.86821	7.32813	6.84232	7.56669	7.35814	7.46209	7.64353	7.58073	7.58002
Atl1	5.54647	5.7604	5.98288	4.80773	4.58093	5.20992	5.36884	5.56111	5.27355	5.60405	5.76891	5.63052	6.31316	5.51543	5.11137	4.25908	4.26094	4.25609	4.95105	4.27327	4.4456	4.28847
Atl2	8.3893	7.99386	8.09746	8.95548	8.22969	8.64203	7.98952	8.23688	8.39928	7.45953	8.2287	8.82355	9.55543	9.24555	7.95219	8.65111	7.7689	8.33851	8.68247	8.95049	9.16941	8.78897
Atl3	7.28807	6.91228	7.19453	6.84587	7.33383	7.42747	6.65795	7.19703	5.96584	7.0228	7.62447	7.9826	7.2346	7.73049	6.45973	7.95395	7.06005	7.33187	7.36005	6.71307	7.69122	6.78335
Atm	6.4595	7.6261	7.84329	7.76972	7.94942	7.47085	7.99075	7.32567	6.63389	7.20454	7.10505	8.30066	8.53529	8.08212	8.05881	8.49565	7.74917	7.83046	8.06942	7.90323	7.54437	6.95171
Atmin	5.09438	5.76495	4.70017	6.01772	5.63206	6.06611	5.42242	6.07127	6.04637	5.51725	6.30277	4.56139	5.20738	6.0747	6.49619	5.04163	5.6464	5.42669	6.27078	6.09957	5.57622	4.75486
Atn1	4.46718	4.39069	4.47192	4.76247	4.8075	4.1481	4.53754	4.89161	4.47766	4.42456	5.12956	4.84727	4.633	4.21379	4.8009	4.91206	4.27058	4.63984	4.44538	4.17328	4.29953	4.13181
Atox1	9.75472	9.66239	9.80536	9.42834	9.48311	9.31022	9.57602	9.64555	9.53036	9.67835	9.64588	10.1744	10.0921	9.24118	9.58181	9.70727	9.32901	8.9362	9.68903	9.36143	9.63248	9.5346
Atp1a1	8.01254	7.34355	7.48235	6.13663	6.96203	5.97744	7.04453	7.6393	7.2462	7.95969	8.34349	9.07151	8.69814	7.16007	7.69015	7.35177	6.99369	6.37894	6.95446	6.92986	7.40349	7.08087
Atp1b3	11.0829	11.1539	11.0194	11.0322	11.1329	10.9417	10.8993	11.0321	11.003	11.0244	10.8618	10.7324	10.9632	11.3121	10.9836	10.6014	10.4425	10.6931	11.1256	11.7865	11.4942	10.9424
Atp2a2	8.70563	8.90233	9.3648	9.72146	9.7539	9.28483	9.93294	9.46374	9.65337	9.71069	10.0822	9.527	9.66993	9.76793	10.1907	10.0937	8.75727	9.4039	9.65449	8.91077	8.98734	8.35591
Atp2a3	3.65635	3.64082	3.63127	3.63772	3.82711	3.63773	3.62611	3.64058	3.64675	3.64765	4.94066	3.78247	5.20138	3.62021	4.42499	4.63549	6.20706	5.55442	4.7632	5.27372	5.18335	5.37448
Atp2b1	9.12588	9.31058	9.61091	9.34722	9.26943	9.685	9.65651	9.34499	9.8596	9.32641	10.283	10.293	9.59638	10.5565	9.79335	9.91662	8.8152	9.14174	9.67908	9.32604	9.7975	9.59121
Atp2b4	6.77861	7.08621	6.45717	5.34541	5.38363	4.85728	4.55466	6.44283	6.39188	7.1152	7.61958	7.1087	7.72472	6.04896	6.50009	6.70946	6.00037	6.66459	6.16905	6.57242	5.97237	5.1925
Atp2c1	9.06852	9.08505	9.51343	9.37037	9.3759	9.46347	9.46343	9.16063	9.62283	9.1866	10.2953	9.67983	10.0379	10.0759	9.8219	10.2892	8.7869	9.3349	9.03361	9.14854	9.04655	9.11713
Atp5a1	12.6801	12.6259	12.4957	12.4769	12.3577	12.2339	12.4185	12.4595	12.7282	12.3906	11.8289	11.464	11.6194	12.2112	12.1155	12.3157	12.7562	12.6101	12.4047	12.929	12.6899	12.9076
Atp5b	13.412	13.343	13.3386	13.0767	13.0229	12.6279	13.092	13.3842	13.2344	13.1394	12.5242	12.136	12.2193	12.4881	12.4488	12.4062	13.1909	12.9632	12.8981	13.2639	13.2502	13.4587
Atp5c1	11.6207	11.4764	11.4948	11.5755	11.4326	11.6436	11.3301	11.3895	11.2734	11.3569	10.6891	11.0356	11.236	11.5723	11.0928	11.2229	11.5811	11.6946	11.5287	12.5134	12.0348	11.8746
Atp5d	10.7305	10.645	10.5921	10.1872	10.3292	10.1357	10.2852	10.47	10.6352	10.3434	10.1725	10.35	10.358	9.68667	9.9609	9.98319	10.7198	10.2425	10.1537	10.2966	10.4454	10.8105
Atp5e	10.2816	10.1603	10.3408	10.212	10.017	10.0763	10.1735	9.92303	10.3573	9.80469	9.83351	10.1481	10.1333	9.6491	9.45644	9.94053	10.0466	9.71028	10.0806	9.90673	10.2392	10.229
Atp5f1	11.6076	11.416	11.4128	11.6613	11.4754	11.5448	11.5785	11.4813	11.2837	11.8197	11.0383	10.8034	11.367	11.861	11.5918	12.1946	11.8095	11.7587	11.537	12.695	12.3019	11.9809
Atp5g1	9.78496	9.92732	10.0319	11.0552	10.6557	10.9776	10.8069	10.2802	10.2507	10.1548	9.56665	9.59245	9.34606	9.87584	9.68619	9.67691	10.5179	10.0156	10.6908	10.3162	10.2898	10.5287
Atp5g2	9.46485	9.25504	9.5742	9.04949	8.97417	8.56818	9.11049	9.24534	9.10257	8.85537	8.56139	8.97371	8.96474	8.70695	8.43414	8.43259	9.20733	8.74533	9.08701	9.01135	9.19673	9.42094
Atp5g3	10.5662	10.549	10.7748	10.6422	10.5363	10.3467	10.569	10.4528	10.5271	10.3855	10.2561	10.4511	10.3989	10.4543	10.6741	10.6613	10.4384	10.709	10.4001	11.5007	11.2956	10.6569
Atp5h	10.8821	10.8088	11.0658	11.1011	11.1934	11.283	11.1709	10.993	11.0842	10.6889	10.7769	10.9577	11.1298	10.805	10.5467	10.6319	10.5594	10.4686	10.8559	10.7287	10.7865	11.1017
Atp5j	11.5417	11.4031	11.6299	11.6819	11.7139	11.7949	11.6309	11.5936	11.6263	11.7448	11.3491	11.6024	11.5635	11.8478	12.1508	12.1026	11.7038	11.929	11.6333	12.5923	12.3695	11.7948
Atp5j2	10.3392	10.1287	10.5893	10.5657	10.3715	10.5219	10.4457	10.4946	10.4795	10.3068	9.70322	10.1027	10.0391	10.0251	9.68839	9.9511	10.2898	9.76507	10.3639	10.279	10.6154	10.6697
Atp5k	9.57122	9.556	9.72614	9.87013	9.74528	10.0961	9.93989	9.83102	9.81462	9.42582	9.03865	9.45743	9.38471	9.51638	9.22126	9.24379	9.75877	9.33536	9.789	9.64451	9.95927	10.0576
Atp5l	9.35224	9.07568	9.40635	9.34466	9.25123	9.20982	9.35162	9.29504	9.08725	8.89879	9.0938	9.1431	9.34739	9.22343	9.33975	9.32857	9.3467	9.24568	9.39207	10.0563	9.84691	9.87012
Atp5o	11.0952	10.9994	11.1169	11.3819	11.2222	11.7413	11.2785	11.0778	11.0864	10.8404	10.1993	10.7397	10.6109	10.7319	10.286	10.1079	10.7424	10.3085	10.9204	10.5503	10.9683	11.0865
Atp5s	7.47131	7.12654	7.19421	7.08058	6.57341	7.00535	7.03603	7.30199	6.86639	6.5636	6.63329	7.02751	6.58068	7.65044	7.32082	7.09808	7.44222	7.41319	7.03301	7.77451	7.86761	6.81226
Atp5sl	6.92276	7.40602	7.60003	6.92997	6.91879	7.19438	7.35903	7.81945	7.59795	7.39415	7.75238	6.64877	7.60183	7.57261	7.58439	7.42271	7.76721	7.95734	7.48827	7.51132	7.34093	7.32397
Atp6ap1	9.88734	10.1855	9.57285	10.0474	9.97719	9.72078	9.98913	9.7157	9.50983	9.62678	10.5864	10.1171	9.73344	10.163	9.72527	9.70876	9.54623	9.41552	9.72702	9.78434	10.1609	10.4204
Atp6ap2	9.28649	9.3023	9.49628	9.18369	9.16124	9.46736	9.41094	9.16977	9.19623	9.76352	9.72073	9.60047	10.2528	10.2859	10.6661	10.5426	9.69545	10.2942	9.71648	10.8916	10.9547	10.2139
Atp6v0a1	6.24457	7.20471	6.77458	5.76227	7.0169	5.98859	6.17644	7.38163	7.04245	7.07926	7.45842	7.67798	7.90739	6.34693	7.05521	7.16874	6.01711	5.96653	5.94395	6.90557	6.91762	6.95298
Atp6v0a2	7.75678	8.64121	8.49904	7.81793	7.57275	8.04784	8.36574	8.28506	8.0625	7.50953	7.46706	8.06932	7.233	7.15093	7.62642	7.99265	7.58822	7.75486	6.32631	6.90256	7.55704	7.60608
Atp6v0b	8.96563	8.6771	8.77117	9.07427	8.5877	9.04186	9.16628	9.13476	9.0073	8.56659	9.39912	9.16648	9.31573	9.38423	8.92817	8.76387	9.42582	9.17418	9.62536	9.28801	9.98422	9.91645
Atp6v0d1	8.56112	8.54079	8.7395	8.33526	8.78429	8.70504	8.55156	8.57229	8.54435	8.39263	8.85731	9.05643	8.55265	8.56859	8.09929	8.24888	8.68701	8.05405	8.65023	8.21553	8.92773	8.95437
Atp6v0e	9.49372	9.25716	9.61841	9.81412	9.77717	9.86239	9.38224	8.92108	8.96496	9.00637	9.47347	10.0804	9.93362	9.7228	9.46873	9.47857	9.57341	9.17296	9.71638	10.3749	10.3857	10.6429
Atp6v0e2	4.46158	4.25875	3.89271	4.20738	4.36341	4.8773	4.4407	3.89445	3.94518	4.36908	4.8521	3.89194	4.59558	4.33726	3.89331	4.41083	3.89225	3.90608	4.70142	3.89469	4.16506	3.8978
Atp6v1a	9.21212	9.79802	9.37512	9.19291	9.38757	9.26556	9.4831	9.02514	9.17425	9.66869	9.90447	9.567	9.53752	9.54993	10.0497	9.98749	9.05428	9.01313	9.01466	9.56283	10.2239	9.52808
Atp6v1b2	9.88852	10.3213	10.1246	10.1872	9.68104	9.78831	10.1701	9.88147	9.70034	9.89163	10.2702	9.64875	9.8766	9.73392	9.27684	9.66279	9.72529	9.58442	9.71182	10.1862	10.5942	10.7945
Atp6v1c1	9.16707	8.15419	8.74273	9.02593	9.34899	9.49215	9.17209	9.01627	8.60901	9.08632	9.05247	8.79571	8.9105	9.34459	8.95919	9.37612	8.67406	9.09858	9.3521	9.86394	9.7778	9.8285
Atp6v1d	9.03203	9.08147	8.75823	8.93581	8.97322	8.98711	9.1436	8.52119	8.49103	8.99056	9.08624	9.29489	9.64911	9.22694	9.34039	9.28849	8.70147	9.08392	9.11956	9.36983	9.32448	9.30569
Atp6v1e1	9.4628	9.47945	9.41246	8.80154	9.1046	9.20681	9.54601	8.94018	9.26016	9.31402	8.97319	9.42417	9.60935	9.17008	8.97146	9.08759	9.29583	9.14911	9.41342	9.74819	9.86296	9.96567
Atp6v1f	9.09338	9.10406	9.48405	9.28387	9.30683	9.36047	9.17892	8.92194	9.25222	8.82147	9.46986	9.5167	9.90741	9.10247	9.19968	9.50739	9.66561	9.57002	9.73086	9.97229	10.3875	10.4388
Atp6v1g1	9.56182	9.39422	9.35769	9.57711	9.53347	9.34069	9.59818	9.44799	9.64511	9.45834	9.91936	9.9293	10.2786	10.0286	10.0769	10.3074	9.74121	9.84901	9.76965	10.2012	10.5431	9.97698
Atp6v1g2	3.26708	3.76196	3.26332	3.26427	3.62225	3.6395	3.5734	3.50448	3.26561	3.26575	3.26286	3.82507	3.69399	3.26174	3.7376	3.4287	3.55288	3.67386	3.59752	3.38585	3.54996	3.60121
Atp6v1h	9.23048	9.14927	9.54622	9.16277	9.4015	8.67284	9.03614	9.42134	8.84996	9.28447	9.45526	9.07501	9.56582	9.27634	8.97842	8.89229	9.02264	9.02484	9.40592	10.1013	9.3732	9.67284
Atp7a	8.14708	8.39137	9.0261	8.92438	8.93238	7.85089	9.07539	7.51569	8.81009	8.77849	9.8297	9.61345	9.38649	10.3875	9.19744	9.21365	5.2161	7.52879	8.35081	8.32726	8.80101	8.49832
Atp8a1	4.88614	4.54465	5.58769	5.28343	5.44341	4.75853	5.10784	4.85769	4.44079	5.93576	5.40293	5.83172	5.92928	6.20068	6.34074	6.38074	6.54291	6.69824	6.43598	7.51599	6.92284	6.75708
Atp8b1	3.68184	4.16376	4.64659	3.25239	3.72226	3.25239	3.2485	3.25336	3.25546	3.25577	4.5759	3.65965	4.2475	3.24656	3.2513	3.27646	3.24938	4.40701	3.80716	3.2538	3.25892	3.40119
Atp8b2	6.81667	7.37395	6.55589	6.84187	6.54788	6.87282	6.96979	7.04179	6.68183	6.3914	6.58276	6.74511	7.34434	6.68142	6.31035	6.52185	6.40866	6.19469	5.90219	4.98336	4.92887	6.37242
Atp9a	6.79366	6.68525	6.88367	5.88222	6.02684	6.19522	5.42643	6.31661	6.51234	6.72732	7.5375	6.7086	6.28326	5.62806	4.88472	5.85587	4.9824	4.84637	5.93339	4.57355	5.66771	4.5477
Atp9b	7.71907	6.9101	7.57137	6.84222	6.6308	7.34706	6.54174	7.79272	7.2254	7.91127	8.07395	7.75767	7.87642	7.55397	7.70852	7.14157	7.80955	7.49946	7.35215	6.93884	7.85034	7.70071
Atp10a	4.11532	4.50368	4.66688	4.55789	4.00629	3.93676	4.25493	4.5982	4.14148	4.06334	3.93378	4.35553	4.59026	4.64947	4.00946	4.36543	4.75994	4.43486	4.6777	4.29434	4.80139	4.43111
Atp10d	6.84137	6.33064	5.84805	5.7314	5.99846	5.85303	5.67015	5.11222	5.83615	5.97802	6.72528	6.71677	6.39951	5.5152	6.2999	5.12987	5.84379	5.38512	5.52405	5.37729	4.93558	5.92278
Atp11a	6.63257	7.0068	8.09942	6.62826	7.06161	6.78129	6.29151	7.44907	7.3851	6.98176	7.81982	8.28763	7.43385	8.04237	7.5404	8.07128	6.09278	6.36085	6.79048	6.81444	6.60879	4.76613
Atp11b	8.30721	8.58423	8.42332	8.5069	8.07526	8.25758	8.73768	8.31369	5.9901	8.76297	8.79464	8.53557	8.30217	9.13413	9.36654	7.99606	8.89395	9.06919	8.52139	9.74632	8.56757	8.83769
Atp11c	8.11142	7.94267	8.55577	8.19163	8.62406	8.71471	8.13689	7.9722	7.7403	7.61343	8.44491	9.24365	9.29233	8.73658	9.60255	8.06584	7.93211	9.17373	8.80287	8.10017	8.02097	7.52839
Atp13a1	8.76418	8.09917	8.41827	7.91136	7.42105	7.53119	7.61473	8.75384	8.73871	8.48308	8.6704	8.75067	8.08278	6.95985	7.51734	8.08427	8.43351	7.74368	7.37557	7.60153	7.91447	8.15735
Atp13a2	6.66027	6.54208	6.16985	5.59904	6.63483	6.47185	6.17959	5.80578	7.28293	6.24314	7.71734	7.93474	7.84167	7.0673	7.83963	7.88008	8.33788	7.84691	7.15447	7.3526	8.47235	8.30313
Atp13a3	8.05191	7.86188	8.95244	7.92812	8.25768	8.12734	8.08145	7.9754	8.62855	8.77226	9.05405	10.17	9.59355	9.87523	9.30295	9.04821	6.20587	7.51535	8.36315	9.36771	8.79991	8.09234
Atpaf1	6.84654	7.15861	6.56823	6.91135	7.13699	6.63066	6.54286	6.93722	6.6173	6.02204	7.22093	6.46764	6.75604	6.48407	6.22585	6.54307	7.399	6.84126	6.95577	6.80023	6.63438	7.17202
Atpaf2	8.4157	8.94465	8.34049	9.03722	8.55689	8.8534	8.59931	8.28185	8.6934	8.22249	7.56072	8.16555	8.13348	8.25732	8.29352	7.76331	8.2535	8.4943	8.45784	8.51078	8.40934	8.90155
Atpif1	11.2541	10.9966	11.2262	11.4444	11.2978	11.6289	11.2488	11.2183	11.2241	10.919	10.2676	10.7732	10.8015	11.3716	10.4944	10.8653	11.0029	10.94	11.3641	12.0645	11.8936	12.0468
Atr	7.67782	7.52446	7.3589	8.12194	7.2607	7.48958	7.76622	8.00324	7.62923	7.85055	6.91389	8.04837	8.13206	8.40877	8.83088	8.39369	7.36391	7.92826	7.75345	8.55039	8.17637	7.44222
Atraid	8.84051	8.63596	8.7981	8.35173	8.48281	7.90749	8.2547	8.58097	8.0157	7.92567	9.31697	9.25665	9.34535	8.66762	8.1208	7.89131	7.90927	7.77876	8.39664	8.46551	8.58047	8.80617
Atrip	6.71678	6.12634	6.73029	6.12035	6.48483	6.01485	6.69151	6.23566	7.07224	6.92977	6.6633	7.12621	6.41449	6.11385	6.48544	5.77236	6.96258	6.84774	6.64443	6.65195	6.50462	6.31678
Atrn	7.7277	8.0929	8.16812	7.37919	7.56667	7.93248	7.57135	7.9409	8.24381	8.08687	7.95407	8.49063	8.72636	7.92365	8.59838	8.96476	7.35114	6.96387	7.72642	7.50005	7.42891	6.90986
Atrnl1	4.04894	4.85602	5.65093	5.46929	4.83787	4.77089	5.49436	5.24791	4.10104	4.03464	6.02379	6.6169	6.76332	5.32093	4.25766	6.86119	4.00311	4.19093	5.38282	4.89245	4.66395	4.05141
Atrx	10.4856	10.6284	10.8747	10.0906	10.5354	10.276	10.6603	10.5278	9.91972	10.3465	11.2549	11.4847	11.9198	11.1191	11.1707	10.935	10.1171	10.8269	10.7165	11.0181	10.6273	9.5968
Atxn1	6.15367	5.93899	6.32236	6.24178	6.12652	6.67483	5.60138	6.4164	5.5129	5.94765	7.18058	7.12552	7.5235	6.87178	6.87274	6.64852	6.13389	5.5465	6.3082	6.25334	6.4629	6.06878
Atxn1l	6.11476	6.57285	6.59593	6.38764	6.82012	6.39668	6.72456	6.5368	6.85811	6.45443	6.87864	6.63996	6.91391	6.11108	5.27568	6.31692	6.29545	6.5341	5.49328	6.19646	6.47927	6.21233
Atxn2	7.37426	7.44784	6.88097	7.02084	7.41067	6.83642	7.1885	7.25948	7.79054	6.63413	7.77957	7.83806	7.98629	6.50113	7.69393	7.33028	7.19083	7.21567	7.22466	6.72795	7.04748	6.84725
Atxn2l	8.14409	7.94568	7.98397	7.13312	7.68217	6.16525	7.71185	8.36063	7.74533	8.10088	8.07382	8.17942	7.57468	6.67082	7.60145	8.07678	7.83306	7.24252	7.36092	7.84293	7.94673	8.00311
Atxn3	6.17443	5.16227	5.93972	6.31737	6.18227	5.76595	6.6837	6.57291	6.30462	6.78612	6.76882	6.4839	7.1122	6.74767	5.58021	5.79185	6.91941	7.4078	6.88543	7.36274	7.43975	7.54893
Atxn7	5.4652	5.71545	5.67667	5.92086	6.36617	4.8917	5.55224	4.62599	6.89569	6.02339	6.73067	6.25191	7.24114	6.9793	5.1413	5.31235	5.77865	5.76498	5.8842	5.14006	5.41743	5.18491
Atxn7l1	6.7781	6.78809	7.47672	7.07774	7.46838	6.27054	7.01516	7.30582	7.1346	7.42352	6.7002	7.12525	7.44293	7.53532	7.39201	7.14255	7.38481	7.18162	7.58331	6.9224	7.28657	7.02621
Atxn7l2	3.95979	3.39825	3.39705	3.51653	3.61121	3.41861	3.63437	3.59922	3.6801	3.77211	3.70731	3.47471	4.00144	3.39571	3.68284	3.88754	3.86116	3.57146	3.6811	3.54693	3.6602	3.40048
Atxn7l3	4.94554	4.80068	5.13974	4.88496	4.60558	4.94254	4.59439	5.04057	4.84975	4.48873	5.63431	4.86191	4.24734	4.88638	5.14332	5.7908	5.18507	4.78505	4.42647	4.90954	4.86611	4.38707
Atxn7l3b	9.44966	9.52961	9.43908	9.14386	9.54123	9.59773	9.43243	9.24232	9.19817	9.12861	9.91172	9.47674	8.91006	9.31183	8.92071	9.4736	9.04147	8.95387	9.41124	8.89297	9.10344	9.39774
Atxn10	11.1094	10.9032	11.1698	10.7825	10.7087	10.2833	10.6559	10.7377	10.3138	10.7251	10.9597	10.5228	10.4977	10.7867	10.2701	10.6607	10.8978	10.6321	10.8011	11.4006	11.0866	11.0556
Auh	6.78237	5.57626	6.54482	6.41583	6.32523	6.38197	6.26418	5.7639	6.27975	5.72911	5.82354	5.8543	6.23496	6.50109	6.41659	5.93707	6.89504	6.41224	6.65402	6.49222	6.88235	7.17675
Aunip	5.17213	4.64399	4.61542	5.51365	5.16499	6.08417	5.41196	5.20285	5.06138	4.58406	4.22137	4.42138	4.22518	4.58533	4.22567	4.46272	5.36294	4.88583	5.32179	5.27853	5.15878	4.97618
Aup1	8.65894	8.93301	8.68429	8.3265	8.55123	8.54476	8.47504	8.48365	9.07319	8.9154	8.75249	8.53666	8.49394	7.90783	8.61611	8.12228	9.09411	8.27797	8.40213	8.59372	8.70036	9.41841
Aurka	10.016	9.75594	8.57359	10.2063	9.57291	9.22198	9.77454	9.27313	9.37092	9.58842	5.9218	7.00748	7.5677	9.9311	8.91657	8.15377	9.66213	8.85711	10.1667	9.81811	9.90281	10.3949
Aurkaip1	8.79926	8.94542	8.97899	9.28588	9.23243	9.60083	9.25005	8.86042	9.20602	9.18472	8.42187	8.5984	8.37465	8.579	8.4342	8.25694	9.34732	8.72159	9.34828	9.19134	9.4519	9.65368
Aurkb	9.67714	9.42769	8.73498	10.0465	9.587	9.53172	9.81311	9.14895	10.0167	9.31518	6.07139	8.10803	6.33922	9.79269	9.39085	6.9577	10.0354	8.5819	9.82984	9.22543	10.1719	9.8734
Auts2	5.77354	5.94944	6.27227	5.7809	6.33312	4.71292	5.45465	5.72604	6.71273	6.32797	6.70087	7.0964	6.32089	6.27928	6.39459	6.38148	4.71108	5.8102	5.66945	5.17845	4.84203	4.67435
Aven	4.65054	4.12317	4.29579	5.3251	4.39981	4.73413	4.69409	4.60396	5.27242	4.27081	4.11678	4.37562	4.14922	4.9676	4.78823	4.993	4.61677	5.08572	4.95207	5.53615	5.17114	4.49908
Avl9	5.62526	5.96064	5.68685	5.71385	5.02991	6.51668	5.97165	5.27089	6.81194	5.5765	6.49882	7.06014	6.50459	5.35588	7.22823	5.87622	5.4928	5.4809	5.39876	5.96378	6.96379	5.64052
Avpi1	6.15385	6.6761	6.27188	6.52829	6.38616	6.41513	6.05082	6.41019	6.60933	6.92971	7.31418	7.12872	7.598	6.76995	7.25516	6.8162	6.76374	6.56262	6.7294	5.49577	6.57559	6.5007
Axin1	5.36009	5.92515	5.33252	5.26963	5.49857	6.19022	5.73003	5.04365	5.58368	5.09774	5.56733	5.86684	5.85501	4.66247	4.56708	4.94823	5.61325	5.45817	5.33295	5.43318	5.84719	5.84776
Axl	3.23993	3.23347	3.58856	3.72703	3.49094	3.2322	3.88313	3.23337	3.6106	3.61577	3.22827	3.51488	3.48197	3.22511	4.08502	3.22774	3.22855	3.22646	3.22813	4.92968	4.87991	4.54882
Azi2	8.84054	8.69882	8.74837	8.59966	8.90606	8.18149	8.74475	8.71383	9.04922	9.11798	8.80175	8.98528	8.65136	9.62385	9.48665	9.34672	8.79378	9.49665	9.03326	8.9241	8.55655	8.96428
Azin1	9.7666	10.0937	10.5568	9.68929	9.76709	9.68478	9.7632	9.8055	9.41104	10.4956	11.1868	12.042	11.1484	11.1993	11.7563	11.5634	10.1744	10.5038	10.3378	10.4776	10.6148	9.46548
B2m	11.929	11.7261	11.981	10.8688	11.1834	11.0801	11.0416	11.0361	10.6686	10.9643	12.646	13.1227	12.8196	12.1832	12.5689	12.7134	11.4052	11.9838	11.4931	13.3499	13.7307	13.4293
B3galnt1	4.61953	5.47449	5.48299	5.71293	5.60227	5.55994	4.96403	6.0544	4.61128	5.71212	5.77309	5.68813	6.18944	5.96614	4.60095	5.76533	5.28049	5.92287	5.487	6.80539	6.10461	5.27762
B3galnt2	7.07163	7.09255	6.44045	7.03311	7.01238	7.03974	7.05202	7.20474	5.63381	7.04258	7.61441	7.13117	5.79666	7.21125	6.13126	6.84071	7.4621	7.30468	7.70999	7.42613	7.04156	6.40408
B3galt6	6.70551	7.172	7.2252	6.26235	6.96769	6.69744	7.24354	4.86334	6.89137	7.48081	7.02556	7.46779	7.19733	6.88521	7.39353	7.74928	7.16145	7.81466	6.65016	7.30906	6.83191	6.5287
B3gat3	5.81186	5.80086	5.67823	6.09782	5.76149	5.95673	5.61806	6.25925	5.41245	5.89863	6.08185	5.30185	5.82775	5.26423	5.26216	5.93245	5.23616	5.32092	5.22528	5.46639	5.85729	5.94704
B3glct	6.48543	6.2492	6.00018	6.03651	6.23053	6.40612	6.47849	5.81594	6.61869	6.17458	5.6618	5.48863	5.34133	6.20966	5.93159	5.94309	6.50742	6.38951	6.22595	6.77639	6.9142	6.31526
B3gnt2	9.42408	8.88722	8.94299	8.02009	8.25015	8.06309	8.54547	8.19423	8.91481	8.43855	8.09516	7.72229	8.45289	8.46919	8.23537	8.519	7.03588	7.76424	7.85358	8.7779	8.58025	8.04142
B3gnt3	4.78912	5.54688	5.13177	5.59424	5.03729	5.36144	5.14198	5.10983	5.49205	5.10177	4.74582	5.52028	4.92338	5.29898	4.2279	5.10595	4.22432	4.22111	4.84008	4.23255	4.24208	4.2428
B3gnt5	7.43589	7.89271	7.99972	8.4458	8.06533	7.5057	8.25348	7.31208	8.02535	8.49287	7.74673	7.3726	7.35506	9.41293	8.43833	8.48796	6.74714	7.73471	7.29032	6.77235	7.15159	5.79913
B3gnt8	3.75688	3.78371	4.67973	3.75033	3.95651	4.24174	3.93351	3.90013	3.75348	3.75379	4.60781	4.67564	4.76675	4.07748	3.92887	4.90548	4.41013	4.34607	3.74692	4.23901	4.602	4.07957
B3gntl1	4.71783	4.74343	4.05218	4.63584	4.94481	4.14797	4.49565	4.62815	4.87659	5.46708	4.10161	4.3965	5.18363	4.42406	5.42122	4.05004	4.76528	4.91871	4.48144	4.09212	4.33399	4.68627
B4galt1	9.60927	9.55427	9.8722	9.76394	9.29014	10.1026	9.31965	9.40232	9.6122	9.50175	9.97393	10.2059	9.48997	10.2133	9.86365	9.35716	9.40513	9.5931	9.68597	9.36732	9.55942	9.89142
B4galt2	4.62078	4.90498	4.70505	4.68489	4.81604	4.57359	4.87541	4.90243	4.45087	4.64643	5.24495	4.87926	4.79304	4.15014	4.9761	5.2867	4.50409	4.43439	4.73686	4.14041	4.14627	4.14672
B4galt3	7.63629	7.41182	7.92703	6.8999	7.13892	7.46856	6.81592	6.8751	7.72301	7.68707	7.7229	7.72611	7.94832	6.59024	7.07854	6.65422	6.98302	6.94272	6.58306	6.9518	7.12256	7.71319
B4galt4	7.68888	8.27249	8.35219	6.81875	6.56647	7.61433	7.21681	8.06978	7.48765	7.4976	8.8436	8.47688	7.88422	7.57769	8.69379	8.61432	8.20702	8.46975	7.82729	6.74748	7.16209	6.24603
B4galt5	5.97395	5.62638	6.01228	6.31686	5.76817	6.44495	6.03669	5.74868	5.69015	5.62607	6.65457	6.42615	6.44513	6.5964	6.52335	5.8908	5.67236	5.60593	6.24941	5.73421	6.03802	5.90932
B4galt6	5.70574	5.53024	6.71976	6.19652	6.50268	7.1404	6.67584	7.01911	6.93357	7.24779	7.13281	7.25343	7.12723	6.87733	6.51515	6.91866	6.08335	6.76255	6.78164	6.63472	6.40666	6.69076
B4galt7	6.39505	7.06597	7.00438	7.04432	6.89298	7.17476	6.93507	6.89926	6.88299	6.73349	6.83325	6.67792	5.72742	6.41812	6.36731	6.13149	6.10757	6.27346	6.295	6.07778	6.25136	6.0491
B4gat1	7.18488	7.06486	7.82703	7.49115	7.32619	7.45203	6.78938	7.80888	6.64793	7.49203	8.15593	7.53418	7.35631	7.30395	7.30004	7.93633	7.46492	6.97767	7.12718	6.67615	6.60954	6.24444
B9d1	4.98179	5.88758	5.87452	6.00233	6.23735	5.72554	6.36435	6.4413	5.82905	5.42434	5.7957	6.03385	5.91497	5.82467	5.75668	5.54695	5.2821	5.83095	5.90863	5.08765	5.21355	5.22081
B9d2	6.53708	6.57996	6.56886	6.36218	6.826	7.03524	6.17139	6.86821	6.95189	6.09748	5.92505	6.86949	7.59162	6.56831	6.59848	6.83436	7.88836	7.7249	7.58505	6.87588	7.56086	6.70338
B130006D01Rik	3.31974	3.36683	3.44041	3.33601	3.16453	3.18682	3.17945	3.52683	3.16417	3.91187	3.47506	3.57479	3.35765	3.41967	3.47445	3.37242	3.3211	3.16094	3.1615	3.39073	3.62192	3.52402
B230118H07Rik	7.36898	7.09487	7.48335	7.17025	6.4015	7.12499	6.62532	7.04562	5.96657	7.15721	7.00704	7.12453	7.9357	6.86833	6.75634	7.50375	7.54472	7.23998	7.10487	7.84253	8.05069	7.97561
B230217C12Rik	4.52845	3.9795	4.06579	4.13501	4.3054	3.61279	4.25568	3.61348	3.83943	4.44837	3.6105	3.61026	3.61184	4.10803	4.23489	3.61019	3.91832	3.96062	3.65216	4.3199	3.61746	3.9619
B230219D22Rik	9.24592	9.48645	9.5114	9.30611	9.09961	9.46381	8.93937	9.00584	8.34782	9.34986	10.4333	9.61283	10.2371	10.1661	9.52637	9.86734	9.59408	9.95167	9.31596	9.66917	9.3875	8.70539
B230307C23Rik	6.67947	6.20787	7.09956	6.8226	5.931	6.64077	6.50206	6.79471	6.26537	6.34802	6.04876	6.67603	6.54276	6.56271	7.60501	6.83983	7.03325	7.76031	7.18499	6.58759	7.02986	6.15389
B230354K17Rik	6.73361	6.97889	6.67351	6.49292	5.86386	6.32922	6.82432	5.49615	5.53593	6.40205	7.45516	4.73299	5.9817	6.44386	7.36802	6.9112	6.22987	6.93525	6.81612	6.46613	6.36702	5.75488
B630005N14Rik	7.4849	6.3633	6.79771	6.54073	6.61635	6.68636	6.21733	5.61656	4.89812	7.1297	6.67416	6.91675	8.38103	7.52144	7.95461	8.29616	6.74013	7.00884	7.12883	6.28428	7.37466	6.11901
BC002163	7.04678	7.17832	7.28098	7.83023	7.81723	8.24682	7.62866	7.21395	7.41753	6.78338	6.99164	7.08134	7.23727	7.4728	7.20783	7.17228	7.17595	7.12246	7.69409	6.45371	6.47881	7.04814
BC003331	8.0332	7.77752	8.16028	7.51555	7.54528	6.81102	7.74525	6.83181	7.86718	8.20336	8.09655	8.27845	7.8785	7.94669	8.61192	8.44803	7.84494	8.1776	7.36097	8.93068	8.4561	7.90758
BC003965	8.43502	8.19457	7.92927	8.55831	8.37634	8.89407	8.53244	8.02268	8.68032	8.09876	8.28627	8.05593	7.3689	8.38926	8.49198	8.19663	8.48948	8.95986	8.58373	8.93879	8.73105	9.06581
BC004004	7.87366	8.0161	8.03545	8.05073	7.40632	7.9925	7.68656	7.48114	8.07803	7.48263	8.60803	7.99763	7.98333	7.84625	8.07268	7.74389	8.43069	7.8578	7.79327	8.25558	8.74094	8.2601
BC005537	6.6805	7.42588	6.98226	7.0433	7.39066	6.85989	7.43958	7.08343	7.18072	7.20516	7.26746	7.45228	7.64114	7.88926	8.10214	7.67092	7.39837	7.18301	7.85244	8.47679	8.58486	8.04736
BC005561	6.73448	6.11078	6.56758	6.80322	7.61285	6.60222	7.01342	7.29244	6.95915	7.57315	7.43854	8.18224	7.95851	6.89481	8.27955	8.30609	7.0856	7.63058	7.55477	7.2543	6.11229	6.52321
BC005624	7.53166	6.9112	6.81989	7.93505	7.1832	7.34938	7.66119	7.67175	7.4432	7.08608	7.71041	7.19493	7.35362	6.94768	7.3208	7.15616	7.75463	7.32123	7.54121	7.70712	7.83735	8.03773
BC017158	6.45734	6.02888	6.68162	6.66021	6.51971	5.81916	6.26974	6.23149	6.42144	6.07111	6.94345	7.1356	6.60232	6.1676	6.70806	6.89634	7.0048	6.64447	6.12735	6.37119	6.46232	6.55948
BC017643	7.84298	8.2124	7.89367	7.37708	7.45526	6.7867	6.08436	8.11964	6.56244	7.4195	8.09131	7.83619	7.08967	7.43161	7.67645	7.02616	8.27316	7.39192	7.50329	8.33388	8.27684	8.20547
BC023829	7.48812	7.24534	7.59787	7.48107	7.44984	7.50069	7.18376	7.3038	7.41249	7.87931	6.48463	7.9162	8.01886	7.14741	7.4869	7.03248	6.89272	6.93428	6.99721	6.93082	6.65637	7.37117
BC024978	3.43424	3.22075	3.39789	3.42672	3.22634	3.42677	3.35963	3.37993	3.19578	3.19591	3.41351	3.58858	3.19384	3.52896	3.8651	3.57459	3.21289	3.44203	3.45454	3.27164	3.89608	3.62484
BC026585	5.76996	5.65617	5.59588	5.56066	5.8807	5.74274	5.77909	6.28766	5.72152	5.7771	6.13287	6.4215	6.33936	5.45408	6.03071	5.66118	6.02469	6.0833	6.17818	5.92828	6.2253	6.34224
BC028528	7.77918	7.27462	7.91955	7.12787	7.6266	7.8088	7.27275	7.0064	7.15601	6.84794	7.61917	7.64738	7.5537	7.17644	6.28941	6.94245	5.46886	5.25794	6.80548	6.22532	7.10661	6.79242
BC029214	5.46821	5.06667	5.87272	5.34541	5.34999	4.60274	4.85935	5.62964	5.47143	5.65689	5.52601	5.96424	5.4163	5.30013	5.17564	5.57603	5.75135	5.37169	5.64946	5.43364	6.16406	5.88052
BC029722	3.42883	3.62858	3.26136	3.43675	3.52472	3.37696	3.23948	3.689	3.24265	3.37993	3.82423	3.97399	3.66638	3.34148	3.24075	3.54915	3.38569	3.52643	3.34887	3.29397	3.72645	3.46047
BC030336	5.59871	6.04611	6.72542	6.25409	6.23723	6.34577	6.1309	5.36155	5.74701	5.75738	5.85453	6.21611	6.84389	6.66833	5.65473	5.05921	6.18342	5.65641	5.94835	5.59013	5.24859	6.32877
BC030867	6.07535	6.17524	6.28935	5.8494	5.17188	5.89125	5.70234	5.77596	5.81838	5.73194	4.62278	4.94849	4.6298	5.49069	5.48083	5.94647	6.59477	5.89017	5.63051	6.02258	6.23536	6.66564
BC031181	8.97206	8.46246	8.98932	9.21372	8.88562	8.79747	8.82301	8.87191	9.23919	8.6384	9.14072	9.05666	8.78304	8.96064	8.41024	7.94645	8.8493	8.61661	9.03607	9.24688	8.98582	9.15054
BC037034	3.98635	4.37879	4.07342	4.09285	4.08097	4.05461	4.36009	4.04039	4.42033	4.80138	4.44196	4.48952	4.4412	4.20219	4.01026	4.51353	4.61158	4.54192	4.19187	4.02123	4.37617	4.74279
BC048403	4.13451	4.1255	4.29475	4.11251	4.25235	3.90235	4.32856	4.24462	4.63638	4.70853	3.89964	3.99679	4.70755	4.71147	4.19106	4.41523	4.54194	4.58375	4.1514	4.49696	3.94453	4.54375
BC049762	3.48734	3.6182	3.87767	3.32978	3.48041	3.88805	3.41952	3.70586	3.19238	3.19253	3.18947	3.18931	3.19034	3.4226	3.43189	3.20858	3.51954	3.52973	3.73148	3.29481	3.29468	3.19419
BC052040	7.60768	6.71353	7.18585	6.56388	6.22979	7.08059	7.34932	6.44069	6.27752	6.95927	7.12895	6.74036	5.04042	7.03768	7.43958	6.0848	7.63394	6.79198	7.29572	7.16631	7.32162	7.10136
BC055324	7.43391	7.92112	7.49816	7.82245	7.36115	8.14139	7.43157	7.8018	7.3827	7.23863	6.30392	7.10344	6.01672	8.40856	7.27443	7.72586	8.22139	7.97827	7.45342	7.89156	7.41594	7.0656
BC064078	4.50536	4.94613	5.01322	4.29454	4.75178	4.29455	4.74342	4.29699	5.22391	4.4752	6.03999	5.70374	6.05053	5.60133	6.02164	5.51749	5.18785	5.91897	5.45477	4.5237	5.29308	4.92589
BC065397	4.05438	4.24725	3.72229	3.85077	4.20782	3.63278	4.51545	3.76918	3.63514	4.1613	4.17368	4.01664	4.5458	3.66325	3.63195	3.62998	3.92888	4.43276	3.7897	4.16732	3.67622	4.27117
BC068281	4.52237	4.19746	4.23842	4.63389	4.21879	4.48724	4.28993	5.36321	4.86232	4.30093	4.62052	5.15856	4.44165	4.56464	4.73815	4.36009	4.3222	4.70676	4.64059	5.03677	4.47467	4.90376
Babam1	9.101	9.34743	9.42174	9.24858	8.94931	9.54193	9.38062	9.25462	9.51676	9.05364	9.28582	8.64949	8.62354	9.01875	8.62624	8.81351	9.02109	8.65431	9.22555	8.30252	8.68195	8.9673
Bace1	6.78492	6.45856	6.93709	6.04547	6.22181	6.5985	6.50479	6.11438	6.35231	5.87653	7.74238	6.76525	6.89627	6.09732	7.05668	6.7783	6.14313	6.27233	6.35381	5.44856	6.01955	6.27291
Bace2	4.81907	5.5791	5.03898	4.79414	4.45945	4.79426	4.76683	4.86754	4.49086	5.32422	5.39514	4.76942	4.0545	4.86505	3.99162	4.62461	3.98848	3.98567	4.18816	3.99568	4.00402	4.00466
Bach1	6.79664	6.88026	6.73318	6.94442	6.70524	6.50591	6.59276	6.2133	6.94497	6.2839	6.39874	6.61337	6.95247	7.02382	7.03513	6.63838	6.03057	6.49763	6.88524	6.75298	7.2345	6.27162
Bach2	5.69594	5.00043	5.19653	5.22123	4.83157	4.97102	4.83983	5.37135	5.05495	5.51198	5.60083	5.22661	4.76349	5.87904	5.67578	4.39332	4.77458	5.03784	5.03813	4.47427	4.38643	4.80739
Bad	6.82117	7.09515	7.46048	6.98616	7.22058	7.13041	7.01618	7.71494	7.01188	7.08558	7.82603	7.731	7.19734	6.94204	7.20743	6.97138	6.97728	6.82241	6.78572	6.95363	7.22895	7.67512
Bag1	7.98774	7.90288	8.09841	8.84457	8.92884	8.82792	9.00686	8.16241	7.98568	8.42102	7.63962	7.69724	7.64051	8.75232	8.2391	7.44244	8.35501	8.2183	8.92626	8.27257	8.18989	8.23566
Bag2	8.33861	8.04119	7.84134	8.52154	8.75675	7.78558	8.69196	9.18533	8.1585	8.28493	7.40647	7.99122	7.49143	8.66907	8.46109	8.06043	8.91652	9.24644	8.85043	8.99201	8.36949	8.41734
Bag3	6.97428	6.81522	6.94743	6.25871	6.33193	6.12927	6.83561	6.75532	7.00145	7.17054	6.31612	5.79087	6.44076	5.97043	6.06693	6.81784	6.88744	7.11616	6.41846	5.925	5.98519	6.78078
Bag4	6.45273	7.41383	7.55594	6.32061	7.15713	7.48326	7.11594	7.53234	7.50967	6.98294	6.69958	6.45741	6.9664	6.48393	7.49557	7.85486	7.66019	7.85294	6.88613	8.04291	7.1916	7.59083
Bag5	8.0814	7.78951	8.02639	7.98905	7.94181	8.58799	7.87858	7.52052	8.29616	8.01426	8.19746	7.96838	7.46476	7.94173	7.59549	8.41092	8.24881	8.47724	8.20925	8.46031	8.17139	8.07455
Bag6	7.30134	7.28529	7.17896	7.11093	7.50901	6.9932	7.20859	7.78347	8.12088	7.06571	7.51087	7.98479	8.24886	6.8172	7.67464	7.62908	6.94433	6.71574	7.15447	6.64018	6.72535	6.91302
Bahcc1	6.51387	6.59097	6.71018	6.27294	6.50084	5.5371	6.37419	6.15772	6.5642	6.33827	5.26137	5.76785	5.98202	6.13177	5.80389	6.24502	6.43052	5.83306	6.2115	5.0122	5.56182	5.04972
Bahd1	3.96225	3.98143	3.66755	4.15045	3.8553	4.1803	4.10392	3.69873	4.22057	3.67181	3.87783	4.71634	4.21372	3.66476	4.09492	4.27563	3.7718	3.96854	4.01375	3.67029	4.38127	4.485
Baiap2	7.30124	6.97784	7.14505	6.96965	6.79217	4.86545	7.29	7.44387	7.19407	6.50115	7.18678	6.81301	6.75695	6.4324	6.33361	6.35493	7.10036	6.43963	6.49569	6.2384	6.39985	6.45857
Baiap2l1	3.30068	3.19438	3.37539	3.42315	3.71607	3.1674	3.16565	3.57594	3.1688	3.4908	3.16594	3.97726	3.63886	3.22655	3.29662	3.16575	3.49504	3.16528	3.48775	3.56811	3.43952	3.56291
Bak1	3.74613	3.48888	3.5648	3.64321	3.55442	3.62503	3.61996	3.51147	3.81499	3.78422	3.73873	4.20754	4.01978	3.55191	3.53866	3.7294	3.55603	3.65809	3.58365	3.66137	3.59991	3.7059
Bambi	10.0744	9.19836	9.20911	8.88763	8.76398	8.16002	9.01452	9.06398	9.44466	9.38443	9.38924	9.75556	9.72504	9.47887	9.13989	9.772	7.89175	8.4429	8.64384	5.60847	7.73438	6.37398
Banf1	10.9646	10.758	10.9446	11.3336	11.0289	11.3584	11.1529	11.1795	10.925	10.7824	9.89164	10.3978	10.017	10.6902	10.6048	10.4371	11.3222	10.9343	11.2447	10.8524	10.7684	11.2556
Banp	7.47141	7.42937	7.26451	6.87551	7.44382	7.22269	7.30396	7.86987	7.85885	7.87574	7.42824	7.93293	7.5213	7.39553	7.41491	7.69669	7.52689	7.20907	7.09257	6.57637	6.8928	7.10372
Bap1	8.00443	8.10584	7.68999	7.82483	7.93133	7.97334	7.86645	8.13496	7.85697	8.74031	8.05263	8.34213	8.44125	7.35137	8.17401	8.08301	8.13914	8.05066	7.62889	7.40716	8.20839	8.08015
Bard1	5.9099	5.94302	4.999	6.26059	6.06566	6.12337	5.8768	6.28347	6.30172	6.31458	5.17521	5.2563	5.44916	5.55042	5.98258	5.69075	6.19278	5.84645	6.01859	6.44989	6.12144	6.5796
Basp1	6.68376	6.31074	6.84908	6.41503	6.63296	7.10533	6.77065	6.76505	7.44191	6.63762	6.57904	6.68165	6.76401	6.90832	6.12012	6.91257	5.78377	6.10913	6.07234	6.15525	6.29127	5.89288
Batf	3.9545	3.81605	4.09246	4.71377	4.12266	3.81319	3.80246	3.81583	3.82154	3.82238	3.80427	4.54249	3.80953	5.03427	4.54881	4.47257	5.57878	5.52753	5.6324	5.53358	5.65813	5.81992
Batf3	3.83332	3.98789	4.29384	4.14197	4.10156	4.30481	4.50078	4.11147	4.30753	3.99133	4.24308	4.61969	3.79992	3.86278	4.28947	3.79873	3.89756	3.82752	3.98326	4.10159	4.19949	4.41332
Bax	9.42533	9.63115	9.2632	10.0091	9.80063	9.9826	9.73034	9.60721	9.47641	9.33904	8.98293	8.47701	8.27718	8.97036	8.67259	9.02302	9.24139	8.68105	9.56068	8.92779	8.91945	9.26768
Baz1a	7.38704	7.18842	7.87903	8.14016	7.91371	7.1351	7.68299	6.9271	7.16205	7.62453	6.94619	7.40729	7.31804	7.6905	7.66494	7.50321	6.93455	7.57492	7.65528	8.07123	7.12573	7.45077
Baz1b	8.6174	8.58302	8.93341	8.49071	8.45981	8.30776	8.6739	8.52663	8.83588	8.43574	8.76788	9.02673	9.06406	8.40821	8.86434	8.72629	8.36683	8.57809	8.53303	8.67661	9.04705	8.92068
Baz2a	6.64506	6.23429	6.85621	6.07419	6.85969	6.69253	6.65172	7.19835	6.98285	6.8429	6.80291	6.78516	7.07419	6.51682	6.23836	6.41746	6.39745	6.32057	6.42253	6.10464	6.59511	5.86676
Baz2b	8.51611	8.77815	8.06974	8.47203	8.6956	8.03531	8.29321	8.59326	8.68212	8.13457	9.6146	9.30189	10.0886	8.94662	8.85847	9.24724	7.66318	8.24178	8.49262	7.71095	7.84774	7.67581
Bbc3	3.68357	3.64938	3.85558	3.65002	3.63097	3.35527	3.3535	3.86188	3.48754	3.87146	3.77144	3.53451	3.47587	3.81866	3.43897	3.3895	3.6939	3.7918	3.66131	3.35592	3.48284	3.48505
Bbip1	7.96793	7.7257	7.91798	8.05152	7.91616	8.4336	8.10477	7.74306	8.04619	8.16154	8.46394	8.313	8.31356	8.64325	8.34647	8.02184	8.06856	8.15986	8.07426	8.5543	8.39688	8.37307
Bbs2	4.27337	3.89202	4.58558	3.8908	4.21114	3.89081	4.40718	3.92441	5.02884	4.27692	4.42819	3.88669	3.88927	4.77441	4.53508	5.10719	4.94096	4.84749	4.35846	4.45464	4.24747	4.22357
Bbs4	5.59248	5.66147	5.64794	6.09167	6.91343	5.2157	6.28985	6.22797	6.48732	5.53392	6.41308	6.43272	5.44764	6.26863	6.80004	6.94407	6.85328	6.24715	6.20555	5.85282	6.60459	5.19424
Bbs5	6.36953	6.07189	6.41914	6.83231	6.62945	6.5677	6.70722	6.15325	5.5558	4.83953	6.81234	5.93281	6.78276	6.82439	6.7139	6.4534	6.19161	6.8368	6.40337	6.5553	5.30052	5.78489
Bbs7	7.00414	6.54612	6.4963	6.7122	6.20015	6.2689	5.97017	6.98973	6.21538	7.38869	6.41629	6.02716	4.83348	6.58015	7.09272	5.38708	4.77124	5.69316	6.32705	5.96131	6.21671	5.90737
Bbs9	5.87733	5.32304	5.19095	5.95764	5.76891	5.9578	6.04403	6.44788	5.75325	5.9796	6.15516	5.77498	4.66277	5.34263	5.37672	6.0997	5.43187	6.25575	5.46695	6.31158	5.22254	5.31248
Bbs10	4.91744	4.5343	4.62389	4.86254	3.88788	3.8808	4.43235	5.53651	3.88634	5.15353	3.87494	3.87432	5.70423	4.7172	3.9817	5.11189	4.1211	4.02426	3.87473	4.66895	4.65526	4.17097
Bbs12	5.65565	4.71287	5.72595	5.35494	4.48138	6.11134	5.85111	6.4104	6.04319	4.37651	4.79262	4.35296	5.96688	4.89823	4.36146	4.35264	5.53121	5.26845	5.57715	6.1206	5.79722	5.74409
Bbx	7.18572	7.1958	6.53143	7.43346	7.76774	7.27585	7.08199	7.37066	7.22933	7.61659	7.7422	7.95559	7.17289	8.23042	7.57869	7.95289	7.17056	7.92319	7.99232	6.8674	7.27607	6.93197
Bcam	3.35748	3.94552	3.38235	3.34473	3.35259	3.34473	3.82804	3.94337	3.68014	3.75937	5.34674	5.31778	5.00045	3.57872	4.48294	4.49642	3.33863	3.55057	3.37664	3.61688	3.4836	3.35852
Bcap29	7.57927	8.54165	8.93314	8.5174	8.28339	9.12533	8.74461	8.42346	8.35893	8.9085	8.95906	9.07995	8.68093	9.13496	9.66433	9.29111	9.5711	9.65357	9.67327	11.1242	10.0822	9.8784
Bcap31	10.2506	10.3303	10.2313	10.7967	10.6339	10.9268	10.5712	10.3292	10.4758	10.055	10.769	10.3838	10.7898	10.8485	10.2531	10.3777	10.3093	10.4708	10.7893	10.9317	10.7934	10.783
Bcar1	7.85035	8.31365	7.59672	7.16473	7.69953	7.2706	7.64007	7.96473	8.84914	7.78967	7.92057	8.30579	7.74502	7.20134	6.34226	7.37197	5.57644	4.82516	6.12661	4.64902	5.0836	4.69552
Bcar3	5.27871	5.82772	6.49944	5.76173	5.72937	4.38628	4.67361	5.3269	6.01201	6.16671	5.64981	5.27548	5.15041	5.3407	5.91013	5.45081	4.69344	5.0868	5.8653	4.39065	4.4064	4.40758
Bcas2	10.0409	9.95904	9.56809	10.3484	10.0532	10.7015	10.5701	10.1956	9.98933	10.1585	9.67365	9.44818	9.39471	10.8263	10.5218	10.6003	10.3864	10.7299	10.6663	11.0965	10.2121	10.1805
Bcas3	6.95363	6.80165	6.71874	6.50234	6.17053	5.94846	5.9029	6.40539	4.95549	5.96459	6.67074	7.03618	6.34015	6.27218	5.8071	6.35715	5.80058	6.29471	6.02162	5.92191	6.67913	6.38127
Bcat1	7.04464	7.23656	6.49594	7.87094	7.70714	7.44605	7.89965	7.41465	7.64426	7.1409	5.34354	6.0035	4.35483	5.51989	5.17426	4.32362	6.32231	5.34686	6.58125	5.7011	5.33052	6.36986
Bcat2	8.28564	8.13751	8.78467	8.6239	8.81645	8.62416	8.89491	8.8138	8.01063	8.34086	8.32383	7.83632	8.5981	8.19256	8.29131	8.128	8.57005	8.41986	8.66744	7.96116	8.19375	8.40844
Bccip	8.85654	8.67659	8.79891	9.49449	8.96101	9.48014	9.55649	8.67696	8.32652	8.72671	8.32102	8.35285	8.95239	8.94824	8.94903	8.63802	9.0888	8.97746	9.41697	9.46205	8.87806	9.3107
Bcdin3d	5.12409	5.2638	4.27392	4.76618	5.14518	4.79918	5.18494	4.87201	4.28151	4.41745	5.13184	4.2719	5.18354	5.16491	4.90053	5.4425	5.08722	4.55828	5.09126	4.7998	4.80663	5.03617
Bche	4.24813	4.66119	3.33609	4.44347	3.76251	3.33894	4.46195	3.3402	3.34296	3.34336	3.33469	3.33425	3.33719	3.77594	3.33751	5.0606	3.335	3.33274	4.11676	3.46229	4.63131	3.34797
Bckdha	7.79784	7.49921	7.46581	7.48888	7.4418	7.1632	6.7741	7.8493	7.20444	6.74521	7.90753	7.54341	7.24156	7.91848	7.50825	7.3757	8.11065	8.15757	7.72794	6.76744	6.77337	7.50591
Bckdhb	7.41654	7.05877	7.16662	7.7022	7.28702	7.53768	7.95931	7.54102	7.24457	7.42309	7.129	6.44702	6.65865	7.21707	7.04649	6.75398	7.24433	7.45664	7.62826	7.17779	6.55017	6.68693
Bckdk	8.38381	8.21753	8.097	8.60306	8.62055	8.33063	8.10417	9.21186	8.71992	8.35579	8.27223	8.39616	7.82131	7.99676	8.11424	7.93106	9.2039	8.85676	8.45307	8.14458	8.5433	9.19137
Bcl2	6.43794	6.26868	6.72733	6.03537	6.60007	6.79887	6.41419	6.49025	6.6663	6.95033	6.43461	6.80651	6.4375	5.96506	6.16179	4.81495	5.61917	5.63309	5.27588	4.66044	5.54597	4.69054
Bcl2l1	7.18139	6.75961	7.56314	6.76562	6.95298	6.86277	7.11455	6.10254	7.21726	7.25888	7.18546	7.22982	7.00448	6.72495	7.24127	6.77571	7.85391	7.47371	6.93641	6.22041	7.11176	6.62185
Bcl2l2	3.94839	3.9624	4.22847	4.28857	4.23856	4.77771	4.48198	4.66293	4.76071	4.58747	4.64838	4.40615	4.76584	3.99825	4.14404	3.9232	4.50191	4.39097	4.00355	4.01706	4.17129	4.2815
Bcl2l11	5.67715	6.07651	5.23974	5.57112	5.94021	5.70799	6.29346	5.78133	5.3399	5.60142	5.59848	6.54544	5.09714	5.78396	5.18393	6.58992	4.69613	5.54452	5.30502	5.96639	5.55402	5.97176
Bcl2l12	7.0692	6.94827	7.16487	7.001	6.96258	7.20966	6.78318	7.04777	6.37394	6.82977	6.68717	6.97175	6.38452	6.66091	6.83798	6.99354	7.02076	6.87792	6.96308	6.17902	6.68599	6.61394
Bcl2l13	7.65314	7.88814	7.79708	7.43968	7.04714	7.24043	7.1184	8.10089	7.36889	7.63646	7.33501	7.83212	5.07822	7.31845	7.61587	6.13516	7.49715	7.53492	7.50269	7.9478	6.91354	8.10692
Bcl3	4.16417	3.97322	3.66382	3.89831	3.70149	3.66543	3.95136	4.01004	3.96115	3.91897	4.73944	3.97212	4.00255	4.28583	4.57166	4.03787	3.66321	3.94735	4.07181	3.91693	4.20704	4.0618
Bcl6b	7.55389	8.14766	7.37368	6.33709	6.60476	6.79514	7.06085	7.16701	7.13696	7.38583	7.58137	7.45328	7.38644	6.72448	7.00496	6.96563	5.3824	5.48724	6.70145	4.55056	4.6104	4.61473
Bcl7a	5.44799	5.35822	5.30193	5.53778	5.72394	5.43152	5.57732	5.32259	6.18631	6.18378	5.10304	6.05619	5.42585	5.80827	6.07658	5.99374	5.46802	5.73304	5.40918	5.3178	5.03413	5.67255
Bcl7b	6.74716	7.14101	6.7894	7.15961	6.77102	7.16511	6.70344	7.14799	6.56638	6.89102	7.11238	6.38744	6.93439	6.54966	6.9847	6.126	7.01696	6.82329	6.75214	6.87586	6.64587	7.47601
Bcl7c	4.72768	4.81724	4.72606	4.68613	4.93561	4.54153	4.89898	4.42676	4.93322	5.02263	5.33399	4.49603	4.92103	4.84841	5.06383	5.26221	5.51912	5.26711	5.26962	4.90911	5.11712	5.17496
Bcl9	5.78396	5.84961	5.88253	5.36471	5.55729	5.25437	5.53802	5.80268	6.49194	5.59096	5.93799	6.44974	6.2424	5.54429	6.12141	6.09993	5.67358	5.5693	5.68666	5.24367	6.17591	5.35228
Bcl9l	4.05021	3.86166	3.76404	3.87091	4.07688	3.70757	3.86993	3.86072	3.90898	3.91275	4.81761	4.48783	4.41669	4.05512	4.09694	4.26318	3.69548	4.1227	3.92657	3.6548	4.14309	3.69803
Bcl10	8.32762	8.27272	8.4266	8.12643	7.73121	7.59689	8.001	7.81913	7.51282	8.31641	8.33632	8.25402	8.36613	7.92479	7.94198	7.58019	7.60214	8.25228	7.86087	7.74148	8.03232	8.38784
Bcl11a	5.43593	5.91752	5.72862	5.16668	5.58028	6.27644	6.10901	5.44391	6.2477	4.81069	8.22143	6.97277	8.1436	7.24521	8.80371	8.64614	8.30861	8.86407	8.02037	8.99508	7.35688	8.06219
Bclaf1	10.4535	10.4668	10.4469	10.6157	10.4061	10.9021	10.6327	10.3773	9.87573	10.4819	10.566	10.2585	10.7181	11.0217	11.3729	11.2752	10.4218	11.0551	10.8347	11.6591	11.0986	10.4663
Bcor	6.73104	6.89015	6.31606	7.10176	6.8978	6.05365	7.08838	6.2268	6.65892	7.23718	5.59401	6.6274	4.7394	6.57165	7.60771	6.76165	7.19545	7.69783	7.24325	6.69787	7.23463	5.30514
Bcorl1	5.20372	5.71651	5.10384	4.8208	5.43637	4.6903	5.58619	5.31311	5.34442	5.25522	5.92026	5.52931	5.39808	5.19828	5.0884	5.11733	5.10931	4.8045	5.15199	4.6613	4.42455	4.42528
Bcr	6.40293	6.86009	6.89573	6.03497	7.06032	7.11791	6.92552	6.61444	7.50289	6.74805	7.99479	8.36811	7.88074	7.33153	7.90118	7.60175	6.34857	6.00838	7.08668	5.74838	5.82828	5.11556
Bcs1l	6.74995	6.13607	7.08725	7.33003	5.72852	5.79351	6.78127	6.1325	6.86718	5.93846	6.13531	6.86085	6.66664	6.54655	6.23986	6.94159	7.42797	7.02737	7.14858	7.33718	7.01298	6.58793
Bdp1	7.95186	8.18755	7.91244	8.09564	8.26112	7.47497	7.72713	7.8881	7.72865	7.51397	8.57603	7.57413	8.64285	8.06323	8.56973	8.20798	7.29518	8.15146	8.12236	8.31859	8.49405	7.7816
Becn1	9.17084	8.89552	8.74123	9.17038	8.97374	8.59308	9.02122	9.09983	8.94261	8.56344	9.19045	8.2527	8.34547	8.91322	8.78808	8.90472	8.61427	8.67743	8.72633	8.24661	8.39844	8.6658
Bend3	5.68618	5.73311	6.21743	6.25214	6.10457	5.94788	6.30265	6.22189	5.63433	6.39507	5.25006	6.08141	6.8128	6.57908	7.23175	6.65335	5.69999	6.70997	6.15096	5.856	6.38352	5.65261
Bend4	6.96398	7.60035	7.50196	8.42221	8.18332	9.23923	8.48438	8.29917	8.19914	8.12463	8.32198	7.96994	8.13566	8.78106	8.61782	8.3565	8.34941	9.14953	8.48672	6.88421	7.3888	6.77455
Bend5	5.37907	5.08523	5.15455	5.01872	5.2398	5.35185	5.04793	4.99158	5.42491	5.42182	5.67472	5.9656	6.13816	5.28808	5.58318	6.12592	4.66761	4.43211	4.49748	4.36855	5.0179	4.382
Bet1	8.89533	8.39232	9.08905	8.90243	8.86686	9.1399	8.7906	7.7324	8.4243	8.88672	9.07418	9.58982	9.60105	9.7986	9.78392	10.0204	8.8721	9.87013	9.50913	10.2233	9.66715	8.30099
Bet1l	7.50288	7.27182	7.61148	7.6725	7.8247	8.27879	7.30923	7.38138	7.684	7.24505	8.16872	7.99894	8.56577	7.46879	7.42235	7.66462	7.40193	7.17097	7.33704	6.82939	6.97763	7.56472
Bex1	6.95783	6.40052	7.19685	8.23713	8.43686	7.82564	8.31348	6.93198	7.1644	7.67805	7.94325	8.73109	8.17108	9.32159	9.81792	9.45473	8.41268	8.92569	8.91021	6.34592	7.28246	6.8084
Bex2	6.88399	7.8425	7.27802	9.02437	8.98506	8.88152	8.68294	8.48242	8.48473	8.67478	4.71953	6.40844	4.03389	8.40348	7.71109	7.38936	5.49169	5.23554	7.38127	5.05506	5.26499	5.61188
Bex4	6.49127	6.08868	6.3526	7.42041	7.3327	7.1177	7.2892	6.8501	6.75731	6.38432	6.90574	6.60643	7.12848	8.1392	7.59738	7.29377	7.14635	7.92551	7.94319	8.24214	7.2361	6.91725
Bfar	7.97626	7.93327	7.83066	7.60666	7.67521	7.57344	7.29305	8.0872	7.52758	7.47856	8.58861	8.38005	7.94949	8.0889	7.44948	8.19224	8.25854	8.18008	7.89497	8.03196	8.09034	7.88307
Bgn	9.35824	8.67682	8.89941	8.48059	8.52817	8.5406	8.61031	8.89297	9.64006	9.05897	9.76722	10.1802	8.9759	8.32418	6.97977	8.27486	5.02501	5.38185	7.76919	6.29914	6.29245	4.36661
Bhlhb9	8.27663	8.37619	7.54424	8.11258	7.55707	8.34097	8.11074	7.60436	8.1404	9.12727	8.37633	7.9536	7.53023	7.88211	9.41275	8.60631	8.93037	9.44871	8.23904	8.85237	9.06944	8.28348
Bhlhe40	4.93365	4.92491	5.49426	4.1309	4.06569	3.6963	4.91363	4.224	3.70169	4.08837	5.36944	5.13713	3.69395	3.68597	4.10644	4.26153	3.69099	3.68794	3.83978	3.69877	3.70774	4.4107
Bicd1	3.17477	3.1703	3.19675	3.16942	3.54027	3.16943	3.16619	3.17023	3.17199	3.17225	3.16673	3.67818	3.16831	4.44798	4.14664	3.16637	3.55467	3.87346	4.36428	3.1706	4.09242	3.72172
Bicd2	6.82663	7.02327	6.69053	6.76367	6.79215	7.12232	6.93636	7.21659	7.68626	6.99979	7.38459	6.59271	5.35471	6.7974	7.00544	7.68811	6.48974	6.6326	6.92877	5.69702	7.11839	6.68695
Bid	5.51337	7.303	6.16407	6.98311	6.81677	7.35008	7.26456	6.78925	5.87089	6.36697	5.86601	5.4829	4.37373	7.56477	7.1157	6.99488	7.93095	7.34875	8.05236	8.63248	8.49999	8.82668
Bik	5.57497	5.71139	6.01048	5.19991	5.59706	4.66672	5.16705	5.02468	4.68381	4.19897	3.67209	3.67107	3.81345	3.9041	3.89626	3.67078	3.67278	3.66759	3.67175	3.68589	3.70076	3.89867
Bin1	7.49782	7.85381	7.84833	7.52672	7.72719	7.19449	7.86629	7.47607	7.66633	7.72047	6.96642	7.17977	6.1651	5.81756	5.47643	5.96572	6.00727	4.5094	5.82599	7.08175	8.09743	7.75014
Bin3	8.00807	7.83732	7.54272	7.63445	7.29282	7.59928	7.28314	8.04912	6.60807	7.19468	7.53746	7.38785	8.20649	6.9159	7.10247	7.54061	8.32989	7.98663	7.85087	7.94075	8.28484	8.51929
Birc2	7.14824	7.62073	7.60933	6.9531	6.89399	7.89558	7.32048	6.91526	7.68375	7.49351	7.41749	7.6437	7.81614	7.6049	8.18794	7.74163	7.45296	7.79865	7.52851	7.65205	8.17192	7.13922
Birc3	5.76132	6.2158	6.17904	5.40533	5.41705	6.53582	5.23196	5.54845	5.1548	5.81281	6.66175	5.24347	5.37821	5.27722	6.28207	6.43613	5.63267	6.79335	5.9888	6.29208	5.78394	6.95384
Birc5	11.1437	10.3266	10.4439	11.314	11.0939	10.9998	11.0364	10.8705	11.1892	10.3154	7.54395	8.94643	8.40667	11.163	10.0111	9.97956	10.689	9.96802	11.1239	11.01	11.2664	11.0857
Birc6	9.87461	10.338	10.4899	10.5285	10.4481	11.7561	10.5939	9.95397	10.0812	11.0172	10.6199	10.8735	10.6946	11.2703	11.0688	11.1799	10.3432	10.8473	10.9586	10.009	9.57616	9.10472
Bivm	6.68825	6.94257	6.3525	6.96024	6.53772	6.49304	6.20154	6.6495	5.34641	6.0255	6.7307	6.82127	6.68596	6.77226	6.13789	7.06394	6.56611	7.16961	6.28532	6.50664	6.31215	6.86984
Blcap	7.56264	7.27792	7.46414	7.08629	7.74249	6.5322	7.43913	7.43988	7.95559	7.27493	8.22134	6.89605	4.75115	7.43755	7.80904	7.18762	7.47737	8.10549	7.10122	7.29858	6.27604	7.71829
Blm	7.55964	7.07429	7.72235	7.59859	7.72083	6.76542	7.71121	8.28357	6.4888	7.85854	6.80495	7.67258	6.43982	8.09274	8.41747	7.46517	7.74858	7.45576	8.02209	8.51267	8.70977	8.1723
Blmh	10.1276	10.1733	9.88767	10.5298	10.3685	10.524	10.3558	10.2058	10.2614	10.232	9.65043	9.19231	9.06326	10.1646	10.0045	9.71245	9.84774	9.82	10.1354	9.84208	10.0252	10.1055
Bloc1s1	8.67298	8.71795	8.87852	8.57372	8.53162	8.31235	8.48746	8.7013	8.64891	8.51067	8.81616	9.18151	9.04171	8.69664	8.40946	8.48883	8.57411	8.36896	8.54374	8.15818	8.78904	8.71202
Bloc1s2	8.24561	7.90503	7.39269	8.2727	8.14699	8.23306	8.40569	8.23885	8.18207	7.83748	7.82654	7.77502	7.6236	7.9656	8.08261	8.26623	8.01926	8.40885	8.19165	9.05137	8.4614	8.15661
Bloc1s4	5.94861	5.70613	5.93381	5.55502	6.06649	6.19159	6.11532	5.76975	6.23195	5.75363	6.04495	5.61532	5.35169	5.74309	5.78625	6.31114	6.10618	5.84427	5.95716	6.15504	6.12124	5.87491
Bloc1s5	7.52102	7.42077	6.93319	7.53806	6.61659	7.2084	7.09054	6.72173	6.55349	6.56717	7.08391	6.06042	7.5448	7.47625	6.71039	6.98364	6.79797	6.87615	7.35784	8.01464	7.31789	7.28905
Bloc1s6	7.62827	8.15457	8.5432	7.72998	8.18761	7.49485	8.21113	8.15318	8.04756	8.29083	8.16131	7.36998	8.69276	8.62084	8.89391	8.04711	8.73989	8.70897	8.09694	8.86142	8.57795	8.08773
Blvra	8.22581	7.8614	7.32463	7.53256	7.68337	8.24121	7.21946	8.54122	7.57289	7.59661	6.41671	7.48666	5.94041	7.40507	7.12206	7.57406	8.07683	7.48986	8.04794	8.75738	8.38742	8.99118
Blvrb	6.19053	5.19993	6.05385	5.73986	5.98427	4.25469	5.56175	5.9697	6.09912	4.35818	5.73587	6.38207	6.99732	5.67025	5.47069	5.70468	5.68985	5.1695	5.89464	8.94614	8.50827	9.23831
Blzf1	7.79855	7.29491	7.3902	7.63441	7.83591	7.46739	7.772	6.87297	7.52125	6.67864	6.18585	7.59436	7.54221	8.00779	7.88997	6.3536	7.58244	7.31254	7.40812	6.32827	7.31286	6.5443
Bmf	3.85198	4.02789	4.28834	3.75844	3.8249	4.14182	3.91912	4.13751	4.5577	3.93563	3.70524	4.05543	4.62253	3.88481	4.09934	3.7193	3.58203	3.61928	3.70416	3.58529	3.76438	3.58939
Bmi1	7.04895	6.30992	6.58627	7.23681	6.94481	7.48995	7.09409	6.29022	6.30635	7.56476	6.58856	7.72563	8.18906	8.218	8.58028	6.21929	6.96104	7.3591	7.65045	7.75952	7.30979	6.04831
Bmp1	7.62236	8.14232	7.25383	7.10228	7.5823	6.20439	7.27126	8.19352	8.43967	7.73856	8.51466	9.16301	9.29187	7.43404	8.29188	8.41921	7.20677	6.89964	6.45313	5.80386	6.05941	5.59838
Bmp2k	5.36808	5.17365	6.48196	5.10219	5.82182	4.67427	5.44813	5.43962	5.16973	6.18396	5.35879	5.40003	5.06093	5.02434	5.24259	5.67001	4.82756	4.43375	4.94008	6.4796	6.19432	6.32779
Bmp4	7.31344	8.04741	6.86026	7.20439	6.84522	7.44818	7.13506	8.19442	8.69387	8.44565	6.87742	6.42279	5.97453	5.19264	5.46596	5.58043	4.02729	4.59364	5.44616	5.85889	4.31921	4.20396
Bmp6	3.67292	3.65593	3.64544	4.31503	5.06141	3.65254	4.82104	4.84073	3.66242	4.26063	5.67886	5.72637	6.36449	5.05632	5.09816	4.96871	3.64268	3.63697	3.94137	3.65708	3.67336	3.67457
Bmper	3.58067	3.54784	3.52694	4.56693	3.88617	3.54114	5.08164	3.54732	3.56053	3.56244	6.7914	5.64802	6.27577	5.54263	6.16713	6.76983	4.3886	4.89391	4.8526	3.55011	3.58149	3.5838
Bmpr1a	4.3571	4.37317	4.23185	6.42363	6.19126	6.92785	6.8488	5.41616	5.14686	5.73327	8.2848	8.20605	8.30357	7.37446	7.36917	7.11497	5.08174	6.35704	7.24151	7.03295	6.32191	6.87908
Bmpr2	8.89579	9.28958	10.0734	8.67224	9.04774	9.5186	8.61143	8.30756	9.04642	9.32351	10.3648	10.8433	10.7434	10.2171	9.64957	10.2365	7.83755	8.76442	9.11187	8.80927	8.50677	8.29866
Bms1	7.49585	7.48331	7.60955	7.63209	7.83106	7.85606	7.88994	7.62054	7.68984	7.82111	7.53745	7.45401	5.94225	7.65486	6.81683	7.39973	7.42886	7.50548	7.68358	7.69037	6.83723	7.50479
Bmx	3.69949	7.01555	3.88212	5.94758	6.04058	4.27603	6.18067	7.36923	6.3437	7.96417	9.68118	9.78083	10.0249	9.04236	9.51376	9.70639	4.99298	6.79601	6.87212	3.5305	3.70372	4.83508
Bmyc	7.4362	7.70844	7.89899	7.65725	7.70667	7.32702	7.83604	7.64075	7.98377	7.42475	7.02934	7.40998	7.31403	7.57923	7.14826	7.71676	7.39398	7.96258	7.80119	6.96435	7.0735	8.01098
Bnip1	7.74108	7.94559	7.87531	7.69422	7.32423	6.93801	7.41656	7.4685	8.06846	7.43686	7.85903	7.29284	7.56554	7.21448	7.40794	7.15336	7.82417	7.24839	7.60161	7.86783	7.57619	7.84809
Bnip2	10.9623	10.686	10.7373	10.7594	10.6545	10.9325	10.5662	10.8075	10.4353	10.7727	10.9708	10.9195	10.9326	11.131	10.2846	10.7947	10.104	10.2242	10.4985	10.4285	10.4416	10.1808
Bnip3	7.96247	7.94338	9.3196	8.58543	8.89021	8.88541	9.04152	7.74561	7.88438	8.59119	7.59432	6.44501	7.86037	8.47867	7.70887	7.61093	7.69243	8.00558	8.07364	10.0969	9.38454	9.4919
Bnip3l	9.10197	9.57923	9.84576	9.49178	9.43049	9.83494	9.81576	9.4277	9.34678	9.79238	10.031	9.93686	9.76961	9.77294	9.8214	9.84544	9.15688	9.45749	9.57143	10.0022	9.2535	9.46269
Boc	4.19955	4.29017	4.20307	4.01498	3.61963	4.04225	3.75122	4.45094	4.27951	3.98355	3.85672	3.91395	4.15049	3.61527	3.63687	3.63234	3.71483	3.61576	3.61637	3.80832	3.62082	3.621
Bod1	6.36734	5.40654	6.36269	6.75569	6.71612	6.4857	6.71671	6.44312	6.52958	6.20587	6.03968	6.88929	6.56413	6.56786	6.30779	6.62935	6.58058	6.29843	6.56441	5.66554	5.56756	5.57656
Bod1l	7.81397	7.68853	8.38725	8.40122	8.13193	8.2709	8.09746	8.32617	7.99895	7.96417	8.19787	8.47351	8.46339	8.66197	8.88215	8.29654	7.51577	8.18857	8.191	8.68353	8.07067	8.22057
Bok	7.54971	7.85288	7.97414	7.28414	7.66152	7.94424	7.3489	8.23198	7.39219	7.91135	4.23607	5.18042	6.32978	5.26664	5.93486	6.32095	6.855	6.54611	6.43335	4.31419	5.3475	4.39642
Bola1	7.42179	7.284	7.40762	7.44043	7.07969	7.40164	6.87444	7.48346	6.91436	7.011	6.77417	7.01904	6.88796	6.77132	6.68072	6.93241	7.59177	7.11088	7.16464	7.68477	7.42792	7.57588
Bola2	8.63128	8.37756	8.7799	9.33692	9.12205	9.26083	9.18639	8.86723	8.91169	8.58063	8.21943	8.8604	8.5686	8.79609	8.66645	8.39936	9.04201	8.95591	9.37974	8.47625	8.84699	9.07773
Bola3	7.87256	8.15912	8.19583	8.53745	8.14121	8.49509	8.49186	8.50827	8.22777	8.07755	7.6476	7.73115	7.46075	8.04892	7.96565	7.77497	8.34909	8.11016	8.33208	8.28611	8.36549	8.56257
Bop1	8.73972	8.35745	7.77469	8.60259	7.70648	8.28241	8.63216	8.51603	8.86445	8.56745	7.5148	7.65154	7.58474	7.74756	8.31583	7.56896	9.11493	8.85911	8.58723	7.73953	8.13567	8.42915
Bora	8.41579	8.15075	8.66741	8.54503	8.16217	8.34059	8.53816	8.00497	8.44243	8.73344	6.87318	7.64021	8.18687	8.85396	8.83976	8.71892	8.56723	8.77396	8.65037	9.2845	8.87602	8.29844
Borcs5	5.44188	5.30123	5.0186	5.93596	5.60934	6.04432	5.93633	5.6874	4.71543	5.18952	5.24986	5.66873	5.63114	5.71726	6.24887	5.49655	5.98638	5.83303	6.07484	5.52852	6.49967	5.85013
Borcs6	3.83844	3.63978	4.07828	3.74098	3.48137	3.44807	3.77106	3.63891	3.44979	3.56444	4.35937	3.76509	4.01857	3.61795	3.78739	3.81358	3.57888	3.73981	3.54074	3.59928	3.88338	3.72641
Borcs7	7.436	6.54518	6.65293	7.35368	7.16289	6.41305	7.27747	7.45024	7.03365	7.54994	7.69182	7.42204	7.53427	7.34744	7.46476	7.57999	7.6319	7.61272	7.30057	7.80434	7.89191	7.42938
Borcs8	7.46796	7.76561	7.76985	6.93006	7.3246	7.34698	6.96197	7.2779	7.05871	7.22184	8.39286	8.20126	8.4308	7.56818	7.28971	7.70918	7.71299	7.63186	7.47846	7.60211	7.67903	8.38437
Bpgm	7.07418	6.37889	7.20577	7.25002	7.06635	5.95129	7.29117	7.06215	6.4627	7.2801	8.41146	8.90921	8.74772	7.57535	7.23463	6.91267	7.50685	7.09139	7.28316	7.19344	6.88533	7.12873
Bphl	7.85326	7.49937	6.64199	6.74486	6.91977	7.51622	6.086	6.86315	7.36641	6.86319	6.509	6.70281	6.86844	7.18466	6.62453	6.75466	7.0847	6.77533	7.22713	8.11743	8.53651	8.26681
Bpnt1	6.26272	7.58461	7.29264	7.77164	7.65289	6.61481	7.89425	7.60275	7.77877	8.0656	5.44909	7.50234	7.88218	7.5463	5.65122	6.58642	6.96128	7.43417	7.33416	7.10307	7.19411	6.59731
Bptf	8.35622	8.75753	8.30884	8.83812	8.76109	8.58526	8.09428	8.76235	9.14577	8.32331	8.9703	8.66588	8.87334	8.75743	8.42807	8.8143	8.20119	8.34856	8.50951	8.4384	8.55035	8.76106
Braf	7.71463	7.70284	7.93951	7.5066	8.29739	7.86673	8.2367	7.37147	8.02531	8.14654	8.1491	7.0464	8.14411	7.42679	7.63775	8.62314	7.66586	6.97508	7.32603	7.62776	7.99124	7.19882
Brap	7.43503	6.55179	6.52028	6.52133	6.69737	6.83162	6.77954	6.73989	6.80673	6.56149	6.11294	7.15844	6.19909	6.6055	6.7578	6.72065	6.64449	6.95906	6.94063	6.84694	7.53341	6.99529
Brat1	6.48968	6.26507	6.13905	5.56894	5.47239	6.05018	5.57128	5.63191	4.72906	5.91462	5.71464	5.10863	5.93576	5.72031	5.30959	6.00085	6.35296	5.91093	5.72827	5.78064	6.26735	5.94277
Brca1	6.62577	6.88559	7.18172	6.28277	7.8954	7.16662	7.27752	6.08321	5.34241	7.21879	5.6466	6.50828	6.50446	7.58764	7.32803	4.71929	7.17584	6.86797	6.72521	7.94217	7.0461	7.21876
Brca2	8.02142	7.36308	7.32773	7.30592	7.83844	7.46265	7.50699	6.65241	7.07923	7.85627	6.08354	6.8917	6.92434	8.01939	6.95607	7.71764	7.85684	7.88321	7.09626	8.26921	7.56865	8.27408
Brcc3	9.37599	9.44593	9.61472	9.78539	9.60799	10.2926	9.61402	9.23669	9.72899	9.50087	8.24295	9.23678	8.86185	10.0437	9.43954	9.91202	9.88906	9.9677	9.99742	9.88882	9.96149	9.34708
Brd1	7.48756	7.7817	7.22639	7.66113	7.41402	7.30602	7.43152	7.28973	7.44769	7.72959	7.98726	7.48237	8.35062	7.91217	8.219	7.97851	6.91414	7.70746	7.72569	7.26484	7.33486	7.20747
Brd2	8.04092	8.14616	7.81719	7.59281	8.06051	6.60758	7.76237	8.00338	8.65308	7.91359	7.70727	7.85283	7.99432	6.84481	7.9666	8.25446	7.74094	7.56135	7.30143	7.62513	7.75034	8.07175
Brd3	9.49004	9.6297	9.51134	9.76028	9.87809	9.87096	9.86419	9.84692	9.95885	9.11524	9.51244	9.77694	9.50375	9.68187	9.74299	9.3809	9.56932	9.67664	9.71229	8.3198	8.56989	8.86663
Brd4	8.71393	8.46792	8.44725	8.50796	8.92144	8.20264	8.51338	8.82092	8.84829	8.11727	9.10808	9.08961	8.47542	8.26863	8.60168	8.56661	8.17755	8.074	8.39186	8.47511	8.4713	8.25146
Brd7	7.50846	8.52962	8.71144	8.47808	8.89646	8.68901	8.257	8.29166	8.61165	8.31821	7.74497	8.28554	8.64349	9.21963	8.53089	9.03138	8.57779	9.1896	8.7855	8.30153	8.6561	8.30432
Brd8	9.62493	8.91192	9.18548	9.08156	9.1188	8.96983	9.44623	8.84525	9.5547	9.61167	8.89728	8.85402	9.22757	8.83135	8.43086	8.84896	9.03097	8.73447	9.13259	9.0071	9.15427	9.06878
Brd9	8.19574	9.05051	8.04956	8.44337	8.67457	8.8563	8.2803	8.84101	8.44112	8.87585	8.11785	8.57308	8.48409	8.30881	8.38522	8.27586	8.4413	7.73627	8.41134	8.23614	8.33177	8.77372
Bre	8.55573	8.20138	8.78346	8.26816	8.2046	8.41009	8.32235	8.13489	7.96403	8.58747	8.41508	7.78955	8.3696	8.42717	8.2934	8.49932	8.53791	8.53936	8.53014	8.54841	8.10521	8.45072
Brf1	6.90278	7.42034	6.68802	7.02848	6.89675	6.58659	7.00266	6.70599	7.22051	7.53755	7.87024	7.23131	7.46471	6.25001	7.12889	7.82849	7.22533	6.69324	6.72405	6.78493	6.41004	7.04587
Brf2	5.33666	5.38102	5.40996	5.3458	5.32025	5.54326	5.43705	4.97907	5.40743	5.82082	5.22922	4.72696	5.16692	5.08615	4.8991	5.18095	5.34745	5.29074	5.14838	5.36835	5.1756	5.46022
Bri3	5.11545	5.29919	5.49273	5.07635	5.25436	5.0184	5.11707	4.99506	5.27262	5.03252	5.08802	5.26107	5.5594	5.22329	4.8987	5.29976	5.02669	5.00343	5.25264	5.0694	5.07934	5.04588
Bri3bp	7.42554	6.95938	7.50538	7.50202	7.28731	7.50226	7.29803	7.60156	6.99864	7.54671	7.64085	6.86239	6.23764	6.97928	7.42972	7.24877	8.54023	8.43929	7.97532	8.75016	8.27227	8.73872
Brinp1	3.32031	3.3518	3.3119	4.42335	3.4394	3.31403	3.70315	4.41195	3.31705	4.41043	3.31085	3.31052	3.90346	3.3083	3.31296	3.31043	4.72107	4.15809	3.81234	3.42277	3.92119	3.32083
Brip1	6.89734	6.12606	6.18645	6.7405	6.09803	7.06821	6.75771	5.87968	6.54135	6.78798	5.28252	6.57842	5.93234	6.3437	6.25587	4.84397	6.74579	6.53808	6.87507	7.95317	7.25154	6.3493
Brip1os	7.68966	7.66605	7.47552	7.36363	7.46478	7.39736	7.69547	7.36842	7.50209	7.58807	7.12663	6.98996	7.16772	7.22039	7.09221	7.90314	7.62444	7.54369	6.68931	7.68714	7.44101	7.21241
Brix1	9.95273	9.84984	9.62109	10.6568	10.3851	11.0036	10.5759	10.2069	9.89719	10.3399	9.5024	9.47336	9.29797	10.9455	10.5707	10.2628	10.6883	10.8473	10.8332	11.2685	10.0499	10.2833
Brk1	10.555	10.4025	10.2752	9.92812	9.92973	9.40507	10.0462	10.0634	10.1154	10.2148	10.2413	10.3369	10.4195	9.59789	10.0146	10.022	10.241	10.0836	9.95811	10.3068	10.2464	10.6309
Brms1	8.30777	8.0969	7.98023	8.12726	8.14482	8.16726	8.05263	8.43715	8.59633	8.43009	7.69579	8.30205	6.99991	8.15339	7.5982	7.87582	8.35586	8.07429	8.06639	8.07434	8.18702	8.43304
Brms1l	7.53448	7.67608	7.49701	7.9238	7.6947	7.37071	6.82063	7.8045	7.93157	7.50147	7.18608	7.48496	7.65903	8.02633	7.36921	8.08052	6.49089	7.10161	7.2048	7.55058	7.66934	6.94747
Brox	8.10549	8.53406	8.31586	7.62476	7.91674	8.24623	7.01602	8.12728	7.92206	7.55966	8.42039	8.51837	8.89291	8.24637	7.38234	7.93328	7.4833	7.87334	7.33084	8.03384	8.82576	7.97414
Brpf1	5.58478	6.57813	6.81876	5.90116	6.70121	6.83378	6.47693	6.14736	6.83653	6.81216	7.26905	7.2341	6.80088	6.00343	6.76627	6.70984	6.65573	6.27002	6.51161	6.02098	6.65964	6.87887
Brpf3	4.13518	4.69481	4.34232	4.27071	4.45558	3.95674	4.31521	4.39545	4.64677	4.48063	4.37125	4.61488	5.03224	4.40618	4.0748	4.90586	4.01855	4.30673	4.22724	4.36953	4.30433	4.38302
Brwd1	7.98279	9.01236	8.75962	8.56184	9.13502	9.14873	8.5303	8.95646	9.10349	9.28072	9.29963	9.60944	9.98143	9.11456	9.33771	9.2799	9.03109	9.841	8.73291	9.01867	7.61094	7.57865
Brwd3	5.67773	5.56674	5.16933	6.11394	4.56492	5.38033	5.45937	4.767	5.69049	6.12774	6.17574	5.72837	5.91366	6.24888	5.20506	4.89809	5.20008	4.98959	5.71714	5.91799	4.97818	5.47514
Bscl2	6.52805	6.56312	6.84871	6.98756	7.18712	6.89897	6.57851	6.34425	6.98705	6.76311	7.79702	6.95896	7.02733	6.84513	6.90934	6.87034	7.38845	7.04971	7.33495	7.89299	7.92321	7.78965
Bsdc1	5.86217	5.81238	5.97147	5.38632	6.37489	6.88827	5.57859	6.14956	6.8107	6.7441	6.43256	5.00926	6.38025	6.08885	5.79494	6.63751	6.19244	6.3561	6.48106	5.5138	5.74849	5.96667
Bsg	11.7295	11.7451	11.7113	11.7181	11.7275	11.721	11.7701	11.7543	11.3216	11.3256	12.1078	11.9711	11.9959	11.4853	11.1236	11.2666	11.2386	11.1265	11.5273	11.2007	11.2316	11.8073
Bst2	8.39906	8.39769	8.61406	7.65356	8.05593	7.34652	7.68388	8.08647	7.80368	7.96094	9.3983	9.04673	9.20702	8.47789	8.70491	8.22973	8.25761	8.00282	8.48881	7.39619	7.51758	8.2469
Btaf1	7.09137	7.93665	7.97314	7.98479	8.22781	8.25083	8.01082	7.64196	8.08626	8.46301	7.67677	8.59858	9.04135	8.44736	9.74408	7.70938	7.79076	8.04121	7.46124	9.09754	7.97574	8.47158
Btbd1	7.48756	7.76901	8.01264	7.42712	8.09827	7.56553	8.04706	6.4827	8.05061	7.89043	7.97659	7.98902	7.90669	8.11087	7.71226	8.25067	7.70583	7.07296	7.35558	7.9605	8.08838	7.40759
Btbd2	6.13206	6.1106	6.55209	6.17596	6.44754	5.95425	6.87464	6.76734	6.26371	5.717	7.0093	6.88904	6.21927	5.93906	6.65107	6.3657	6.40633	6.40706	6.60448	5.71323	5.61556	5.79566
Btbd3	7.94276	8.44466	8.25401	7.79878	7.21713	7.44295	7.6766	7.34122	7.78456	7.78273	7.56985	7.2383	7.64541	7.43863	7.1375	7.73306	6.90457	6.27895	7.04873	6.22235	6.82671	5.86846
Btbd6	4.64603	5.81263	5.84194	5.25595	5.42822	5.42408	5.20797	5.61569	6.0692	5.43983	6.14503	4.47111	5.70415	4.85365	4.5142	5.32433	5.00686	5.45861	5.37887	5.0306	4.60564	5.20794
Btbd7	6.37699	5.97778	5.97624	5.31865	5.95879	4.96863	5.79475	5.73747	4.96853	6.31951	6.60444	5.39612	6.49014	6.21344	5.48596	5.28331	5.45913	5.28035	5.89615	4.8085	4.87214	5.93961
Btbd8	3.51236	3.63221	3.99312	3.3758	3.43991	3.63673	3.56352	3.56945	3.37749	4.13306	3.80607	4.12302	3.37507	3.62313	4.02743	3.74633	3.43475	3.65922	3.46998	3.43092	3.60041	3.75618
Btbd9	7.29973	7.63291	7.17625	7.26697	7.56942	6.75132	7.25355	7.43466	7.15981	7.00716	6.97206	7.25293	6.67689	6.88539	6.20685	6.95782	6.95404	6.87354	7.22314	6.07954	7.2378	6.8947
Btbd10	8.34464	8.16004	8.31674	7.94195	8.06334	7.5996	8.02694	8.42276	8.43105	7.70454	7.79876	7.58737	8.0613	8.4678	8.629	8.23293	8.11724	8.3173	8.02154	8.19423	7.85463	6.99138
Btbd19	4.6594	4.9292	5.24187	5.84122	4.37456	4.88442	4.95209	4.50314	4.29654	4.73745	5.10242	4.59612	4.64392	5.11705	4.83842	4.70546	5.10222	5.17403	5.20708	5.52264	5.18896	5.24602
Btd	7.63697	7.63773	7.16077	7.091	7.1231	6.57502	7.3894	7.45512	7.17106	7.51157	8.18745	8.33733	8.24495	7.01806	7.22763	7.34476	6.73486	6.48932	6.80957	6.68246	7.22646	6.71114
Btf3	11.1526	11.0465	11.1073	11.1684	10.9492	10.6983	11.0584	11.157	10.9706	11.0424	10.5105	10.6102	11.0376	10.6604	10.9913	11.1033	11.11	10.9393	10.845	11.9956	11.4228	11.3897
Btf3l4	8.81931	8.90188	8.8079	8.73311	8.65849	8.64611	8.92967	8.42698	8.46489	8.82607	9.08118	8.04035	8.76524	8.98084	9.09055	9.43171	8.6967	9.1429	8.81151	9.20602	8.63003	7.93026
Btg1	8.79985	8.93216	8.50149	8.00434	8.41148	8.56652	8.17419	8.41923	8.21786	8.44277	9.06713	9.51977	8.94164	8.8795	8.84175	9.04443	6.77554	7.97581	7.86498	8.14942	8.84975	8.29913
Btg2	7.78755	8.18167	8.62001	7.38519	8.01952	7.43299	7.65319	7.69754	7.51678	7.27683	9.85444	9.03762	8.10103	7.88157	8.23884	8.47328	7.53036	7.7296	7.07727	6.48579	7.41055	9.0477
Btrc	8.014	8.04643	7.83894	8.25421	7.83664	8.22269	7.36541	7.30831	6.73879	8.00591	8.39069	8.10515	7.62769	7.57913	7.36036	7.0521	7.80882	6.98061	7.76058	7.47995	6.94934	7.71539
Bub1	10.0906	9.37678	8.7012	9.82149	9.67855	9.57825	9.65019	8.77617	9.89566	9.21259	7.87356	8.58335	7.88366	10.4877	9.95245	9.22595	10.1452	9.96569	9.68639	9.9628	10.4223	9.99004
Bub1b	9.18808	8.48059	8.23076	9.08605	8.80033	8.09598	8.76021	8.59292	8.97435	8.4305	6.42871	7.01406	8.37035	9.03902	8.8194	7.39391	8.92902	8.26026	8.87408	8.67213	8.92131	8.90518
Bub3	10.7313	10.7618	10.0328	11.0273	10.5731	11.2429	10.8029	10.4343	10.8153	10.1366	9.75498	9.63709	9.91573	10.9171	10.2786	9.55506	10.588	9.83402	11.0066	10.4908	10.7295	10.8694
Bud13	6.19132	6.49806	6.1024	5.97014	6.05219	4.79723	6.54906	6.58854	6.32861	6.81606	5.77714	6.09803	6.22838	5.92922	5.37779	5.4146	6.21229	6.56681	5.72637	6.08593	6.25837	6.27188
Bud31	9.72779	9.53328	9.59337	9.88257	9.80914	9.66165	9.69191	9.44484	9.30996	9.49813	9.45848	9.51956	9.58222	9.76384	9.27126	9.33866	9.55535	9.47231	9.7335	9.75923	9.55917	9.43403
Bvht	6.52022	6.16637	6.36211	6.76336	6.93045	7.37314	6.65991	6.11766	6.53425	6.8272	6.82969	7.00238	6.5374	6.20017	5.2911	6.4232	4.86536	4.7536	5.70089	4.52999	4.56597	4.56862
Bysl	8.2076	8.24572	8.23887	8.5339	7.95437	8.07655	8.63256	8.26062	8.20872	7.95477	6.64426	7.32422	7.76846	7.25976	7.48706	7.71125	8.39933	8.21279	8.31475	8.0838	7.498	8.0167
Bzw1	11.8672	11.9049	11.7513	12.2274	12.0593	12.1466	12.1514	11.7214	11.514	12.0517	11.5689	10.8905	10.7321	12.0897	11.8517	11.5732	11.4951	11.8458	11.9017	12.3084	11.6339	11.6123
Bzw2	10.3208	10.322	10.0325	10.5648	10.1869	10.5337	10.2815	10.6028	10.3253	10.2537	9.9882	9.83444	9.3464	9.98934	9.93663	9.88002	9.94231	9.91242	10.1884	10.1012	9.52676	9.98214
C1d	10.2377	10.3173	10.6966	10.6886	10.6223	11.2958	10.8875	10.7281	10.6383	10.9811	10.0993	11.0964	11.4889	11.7304	11.8306	11.3162	10.7303	11.7372	11.2365	11.3344	10.6519	9.50437
C1galt1	4.27412	4.40999	4.48469	4.73165	4.54328	4.08118	4.29643	4.0263	4.56231	5.04451	4.38606	4.23695	4.98638	4.38284	5.09245	5.02469	4.6665	4.1858	4.43959	4.50825	4.36087	4.4925
C1galt1c1	8.35409	8.01734	7.7198	8.01561	8.17476	7.64411	7.87616	7.0583	6.89425	7.87144	8.55113	8.81544	8.43094	8.68544	8.56654	8.66778	7.47816	8.65376	8.26239	9.35409	7.11913	8.83321
C1qbp	10.1346	10.6532	9.99419	10.8354	10.7253	10.748	10.7177	10.4844	10.5706	10.1929	8.96668	9.29676	9.54358	9.89226	9.93698	9.36484	11.0258	10.7101	10.7643	11.3193	10.8481	11.2705
C1qtnf6	5.59486	5.45647	6.13935	4.91549	5.44369	6.03304	5.56568	5.68479	5.62364	5.70905	6.6384	7.02833	6.47174	5.84229	5.91906	5.5347	5.20753	5.42545	5.03489	5.15627	4.55019	5.02115
C2cd2	7.23779	6.62246	7.53303	6.93287	7.26212	7.20444	7.00611	7.75155	8.08121	6.40562	6.31203	6.92526	6.56129	6.40318	6.35021	6.60629	6.18623	5.93186	6.55125	6.07126	5.38	5.47292
C2cd2l	4.22196	4.19525	3.99235	4.2541	3.5901	3.78254	3.53001	3.69408	3.49457	3.49478	3.92576	3.81225	3.70667	3.80861	4.16521	3.5108	3.53338	3.59624	3.49041	3.62811	3.99164	4.24968
C2cd3	7.51585	6.32298	6.81603	7.2553	7.68257	6.743	7.06416	7.44764	8.41692	7.63259	8.45133	7.59021	7.5946	7.10804	7.61566	7.437	6.19364	6.91749	6.94307	7.42849	7.44335	6.98174
C2cd5	6.16879	6.65409	6.34473	6.36934	6.67255	5.95812	6.40881	6.58618	6.58009	6.31469	5.59692	6.30278	7.16533	6.0667	4.93257	6.5656	6.96626	6.91749	6.81929	6.97274	6.51062	7.31488
C3ar1	2.17658	2.02765	1.91516	4.65795	5.07164	1.99338	1.84497	2.02503	2.08861	2.09742	1.8726	1.85842	1.94658	4.05991	1.9555	1.8544	5.16961	4.89623	3.6337	7.97056	8.98939	9.86636
C8g	3.45082	3.36182	3.80921	3.00821	3.00993	3.17277	3.00653	3.00863	3.04024	3.25323	3.40621	3.00666	3.77784	3.3706	3.05514	3.23239	3.00691	3.41318	3.00676	3.00882	3.17712	3.3188
C030006K11Rik	3.34648	3.3328	3.09333	3.31946	3.12812	3.09433	3.09255	3.26794	3.1558	3.09589	3.09284	3.28869	3.7539	3.10815	3.28677	3.13197	3.40332	3.57196	3.3679	3.70135	3.49483	3.94842
C030034I22Rik	4.00905	3.75304	4.5865	4.04998	4.03708	4.31385	3.91311	4.02145	4.78689	4.10409	3.74886	4.68001	3.75072	3.74634	4.19256	4.29847	5.0403	4.39741	4.24709	4.15627	3.75841	4.1311
C77080	3.33929	3.10567	3.10471	3.40289	3.52629	3.22261	3.5513	3.54075	3.28668	3.51733	3.3859	3.1816	3.29386	3.32494	3.10503	3.44369	3.10447	3.26466	3.10437	3.10577	3.16457	3.32109
C77370	4.70069	4.80144	4.97795	5.40735	4.45281	4.57249	4.58364	4.77467	4.90547	4.33312	3.87775	4.37737	4.25886	4.48218	3.88051	4.27189	3.87804	3.87584	4.35587	3.88371	3.8903	3.8908
C87436	7.10249	7.38808	6.95579	7.11041	6.69768	6.88071	6.98065	7.25359	7.64753	6.5372	6.24856	6.54923	6.46578	6.4	6.92628	6.81532	6.94513	7.13804	6.80159	7.29375	6.92929	6.75166
C130074G19Rik	5.85775	6.38938	6.2158	5.34199	5.85643	5.73326	5.79827	6.03846	5.91059	5.66341	5.68414	6.11481	5.80534	5.6161	5.34894	5.54351	4.76954	4.97092	5.36448	4.55536	4.62405	4.67675
C230091D08Rik	5.67167	6.02732	5.92615	6.15994	5.88237	6.20229	5.67726	5.82569	5.5726	5.11343	5.354	6.07914	5.39	6.39956	6.31874	4.67472	6.40162	6.45748	6.98345	6.70625	5.71552	5.66588
C330006A16Rik	7.68664	8.07236	8.35533	8.43915	8.31441	8.35009	8.28237	7.64549	7.91153	8.17298	7.88021	7.80592	7.7643	7.57026	7.39161	7.69997	8.50894	8.10401	8.34584	6.67759	7.86506	8.16504
C330007P06Rik	7.59335	7.22319	7.34376	6.74791	7.68004	6.86714	7.18243	5.07157	7.13586	7.31471	7.79256	8.30541	8.23404	7.65614	7.95265	7.94326	7.70766	7.86041	7.11936	8.18867	7.32975	7.4235
C330018D20Rik	7.04983	6.73224	6.34176	6.35166	5.56357	6.08319	6.22304	5.2683	5.80355	6.16061	4.53035	4.52738	6.10648	6.31721	7.56801	5.93845	6.64247	6.54991	5.75078	7.8428	7.2516	7.01605
C330027C09Rik	9.14904	8.93156	8.3082	9.01172	8.99162	8.56133	9.32428	9.13036	9.26331	8.1757	6.80059	6.64603	7.82694	10.1364	9.15212	8.76468	7.87976	8.8346	9.51684	9.83512	8.81616	8.7565
C430049B03Rik	7.93946	8.36738	8.54669	7.27323	7.48221	7.20725	7.23914	8.11624	7.61985	8.19066	8.55798	8.85693	8.37978	8.37595	8.13967	8.67948	6.40067	6.75917	7.5136	7.61759	6.23162	5.74779
C530008M17Rik	5.85011	6.06817	4.16682	4.19669	6.08873	5.53004	5.03956	5.26425	5.73633	5.99801	7.88271	7.6656	8.22056	7.53586	7.28536	7.81742	6.28645	5.45444	6.29558	7.07302	4.7211	5.17901
C630043F03Rik	4.17096	4.11621	4.28104	4.86871	4.30988	4.80419	4.17618	4.55821	4.80666	4.85543	5.21245	4.91323	4.09087	5.01135	4.59821	4.31142	3.93143	3.92934	4.12962	4.554	3.94306	3.94353
C920006O11Rik	3.7493	4.2969	4.41786	4.2567	4.1335	3.74454	3.90421	4.33682	3.74682	4.46725	4.40915	3.92476	3.74356	3.85016	4.65377	4.16147	4.31764	4.25976	4.15772	3.80106	4.12978	3.95021
C920021L13Rik	4.22008	4.23084	4.67552	3.85922	4.29889	4.77427	3.91832	3.89298	4.07719	3.71811	3.82396	3.83846	4.48711	4.40941	3.94809	3.78153	3.67899	4.06631	3.82271	3.79783	3.8656	4.04298
Caap1	6.35715	6.10844	5.87531	5.96768	6.21992	5.91224	6.163	5.73223	5.17837	6.18747	4.74532	5.47318	6.23356	6.09462	7.03216	6.48913	5.37446	6.53264	6.65229	5.93673	4.71725	5.98732
Cab39	8.7579	8.94957	8.86088	8.64797	9.00392	8.67424	9.12714	8.85572	8.34674	8.99203	8.64337	9.35616	8.4742	9.60204	8.97733	9.62927	8.03247	9.02046	8.79345	9.80253	8.5765	8.95935
Cab39l	8.21698	8.44789	8.49714	8.59471	8.73364	8.72879	8.72429	8.52498	8.29142	8.28794	8.57434	7.92495	6.46582	8.49569	8.92598	8.11166	8.94955	8.6418	8.85045	9.83007	9.23781	9.21537
Cabin1	7.15831	6.52495	7.24732	7.28243	6.52842	7.2142	7.28852	7.40362	6.03715	6.72486	6.84866	7.11424	6.93617	6.02518	6.32112	6.89482	6.62124	6.77484	6.24042	6.62311	7.06904	7.29581
Cables1	5.8958	5.75272	4.94314	5.89146	5.95845	6.38522	5.6645	6.15546	7.24498	6.11591	7.42081	7.22182	6.56558	5.38056	6.36696	5.78562	4.94481	5.1815	5.1656	5.01282	5.01793	5.02589
Cables2	7.16572	6.66635	6.7487	6.21589	6.61219	5.71531	6.66981	7.0088	7.21397	6.26147	7.06135	7.42204	7.30921	6.84177	6.79025	6.64445	5.77777	5.86199	6.07662	6.26875	5.79177	6.09588
Cabp1	4.35726	3.79334	4.02311	3.64933	3.6735	3.95268	4.045	4.32975	4.99735	4.54531	3.69581	4.42747	4.06082	3.55341	4.21232	3.98266	3.55609	3.55446	3.60491	3.62683	3.56519	3.56556
Cacfd1	6.92829	6.98637	6.49893	6.51368	7.08145	7.4594	6.31112	7.23785	7.41527	6.50305	7.65641	7.76287	5.87649	6.98871	6.56126	6.92145	7.12113	6.52268	6.99588	6.31109	6.34787	6.98823
Cachd1	6.40747	6.3141	6.54221	5.72213	6.3799	6.61634	6.76832	6.80246	6.10641	6.13202	6.93844	7.07164	6.94561	6.51962	6.35965	6.14992	4.86551	4.54153	5.94425	4.69569	4.61383	4.68958
Cacna1e	3.44514	3.42942	3.64195	3.95545	3.65466	3.80076	3.81462	3.851	3.78213	3.62643	3.28073	3.28057	3.28165	3.78331	3.48725	3.80185	3.28084	3.28002	3.39186	3.28298	3.2855	3.28569
Cactin	6.63013	7.37571	6.08077	6.99199	6.40481	6.13657	6.80207	6.81857	6.90939	6.89513	7.00446	5.87351	5.69725	6.53222	6.72618	7.0152	6.91683	6.88559	6.17556	5.69545	5.94722	6.80463
Cacul1	7.7212	7.65731	7.65522	8.04054	7.68383	7.93479	7.73764	8.22928	7.7878	7.55317	8.43305	8.2095	6.78538	8.70809	8.85063	7.91422	7.43606	8.2829	7.82653	7.87058	7.78318	7.65779
Cacybp	11.0584	10.8601	11.0223	11.8028	11.5107	11.9535	12.1262	11.3279	11.5153	12.2065	10.7501	10.6767	10.9674	12.4425	12.159	11.7977	12.422	12.9337	12.4968	12.986	12.263	11.7408
Cad	7.52066	7.20896	7.50022	8.18721	8.30238	8.02925	8.11155	8.16308	8.42845	7.59995	7.25408	7.23905	6.73115	7.00046	8.0063	7.57407	8.51321	8.20268	8.10905	7.4752	7.33277	8.06262
Cadm1	4.6295	4.16514	3.95486	5.14209	4.75039	5.03446	5.02767	4.22198	4.59554	4.85077	3.95308	3.95251	3.98932	4.28857	3.95668	3.95236	4.48159	4.33536	4.67516	5.11077	5.25867	5.70058
Cadps2	3.30889	3.29181	4.76367	3.28836	3.30109	4.65527	3.52513	3.29154	3.36909	3.78842	5.44962	5.43937	5.35288	4.6151	4.32343	4.4623	3.27835	3.31733	3.27719	3.29297	3.30933	3.31054
Calcoco1	6.1377	6.75315	6.30787	5.4006	5.963	5.59244	5.57649	5.36407	5.82376	5.69467	7.09779	7.41824	6.51483	6.1094	6.33257	6.52401	5.85761	6.0482	5.86003	5.79266	5.92538	5.0004
Calcrl	10.0129	9.96726	11.0283	10.0511	10.9385	10.8129	10.811	10.4229	10.2942	11.3094	12.8651	13.2805	13.1807	12.9533	12.9979	13.1211	10.6779	11.9308	11.7999	7.32563	7.57293	7.05083
Cald1	9.76656	9.7906	9.88317	10.1685	10.1904	9.96767	10.1262	10.3309	10.1773	10.1326	10.7594	11.3617	11.4649	10.4819	9.85349	9.88814	5.64105	6.57584	8.88305	7.30958	7.22762	5.01349
Calm1	13.227	13.1134	13.4433	13.572	13.5306	14.1673	13.5626	13.1777	12.91	13.205	12.8516	13.1415	13.034	13.3681	13.1314	13.2385	12.532	12.6857	13.0523	13.0692	13.0075	12.8315
Calm2	12.7457	12.6761	12.8232	13.2678	13.1017	14.077	13.2612	12.6045	12.4274	13.1085	12.6725	12.9155	12.8713	14.5161	14.0512	13.5871	12.9685	13.3433	13.7637	13.2169	13.2145	12.2969
Calm3	8.70323	8.75455	8.63632	8.71341	8.78304	8.89616	8.6992	8.91901	8.69844	8.39349	8.21779	7.98768	7.87576	8.55842	7.5349	8.05886	8.23465	7.98369	8.24648	8.64214	9.0676	9.21198
Calr	11.5529	11.529	11.7229	11.4371	11.5961	11.2622	11.5191	11.5568	11.4937	11.4407	11.4939	11.7285	11.1847	11.1041	11.2295	11.2292	11.057	10.9398	11.0153	11.464	11.518	11.3632
Calr3	3.20849	3.51803	3.91699	3.20488	3.723	3.7878	3.8539	3.38812	3.20661	3.20678	3.46381	3.20289	3.20414	3.42948	3.69037	3.20283	3.32788	3.29446	3.28624	4.18104	3.20857	3.74131
Calu	11.9636	11.7396	11.9232	10.9844	11.2416	11.0153	11.3035	11.4815	11.1983	11.659	11.9171	12.2247	11.7269	11.8657	11.6962	11.6086	10.8422	10.6917	10.8259	10.9135	10.5434	9.91959
Camk1	7.58711	7.68381	7.44652	6.51499	7.06843	6.91332	6.74035	7.41281	7.79824	6.84976	8.03042	7.27721	7.58474	7.55559	7.38962	7.63617	8.33888	7.74493	7.52649	8.23541	8.85988	8.86047
Camk1g	3.1693	2.67362	2.89128	2.6733	2.67448	2.6733	2.67215	3.02235	3.27684	2.67432	2.67234	2.74451	2.99688	3.00562	2.67298	2.67221	2.67241	3.00197	2.93156	2.84041	3.00794	2.67539
Camk2a	3.15283	3.11383	3.11228	3.1647	3.39104	3.11332	3.42162	3.11379	3.1148	3.11495	3.24732	3.35666	3.15991	3.20578	3.49571	3.47917	3.76392	3.8707	3.48693	3.47695	3.96591	3.3173
Camk2d	6.40816	6.82458	8.35662	7.55777	7.22701	7.60002	7.35436	6.34749	7.4749	7.77821	9.04009	9.54786	9.24799	8.65043	9.35754	9.28846	6.69592	8.03286	7.59764	8.24128	8.89697	8.01939
Camk2g	6.92443	7.69667	7.24599	7.68397	7.32914	7.16547	7.18815	7.28888	7.23304	6.89349	8.27269	7.73905	8.24223	6.7526	7.55642	7.10438	7.69644	7.67179	7.45323	6.94366	7.16048	7.42389
Camk4	6.16174	4.92713	5.48864	5.71871	5.32329	4.40056	5.69046	5.44199	5.83959	5.69798	5.26871	5.36396	6.41144	5.47418	6.1077	6.86149	5.1196	4.38312	5.26363	4.45393	5.53382	4.4254
Camkk1	5.43485	6.37772	4.97262	5.13286	5.54243	5.2304	5.12876	4.92283	5.65324	4.38921	5.59791	4.455	4.76688	5.36633	4.72979	5.04348	5.13044	5.09249	5.48026	4.73024	5.3768	5.10643
Camkk2	4.86365	5.47152	5.53396	5.08981	5.38294	5.3596	5.15604	5.49264	5.72443	4.54797	6.27036	5.49556	5.78723	5.04565	5.6361	5.2239	5.33958	5.76306	5.33574	5.1627	5.01398	5.44861
Camkmt	4.98398	5.02442	5.0367	5.47582	4.80807	4.39187	5.00254	5.24087	4.9583	4.82433	6.26057	5.10082	4.42134	5.14455	4.98029	5.42746	5.72632	5.39571	5.62268	5.73659	5.4275	4.83031
Caml	7.58298	7.56914	7.86722	7.8547	7.6709	8.37665	7.90891	7.68231	7.9385	8.08749	8.2544	7.7297	7.93681	8.46079	7.2265	7.88049	7.52659	7.34183	7.78127	8.60197	8.2104	6.71712
Camsap1	6.59898	6.65614	6.43548	6.4541	6.09075	6.39662	6.63506	6.38108	7.16527	6.71534	6.51379	6.25884	6.62162	5.91674	6.75272	6.46214	6.30741	5.73576	6.08054	5.46523	5.62262	5.97296
Camsap2	7.76831	7.84763	7.9164	7.54094	7.72567	8.42325	7.20873	7.0447	7.89757	6.78698	7.69876	8.34224	7.89137	7.50805	7.69292	7.11518	4.72347	5.14345	6.71354	4.90799	6.8239	7.09588
Camta1	7.12096	6.93342	7.55196	7.27018	7.53396	7.38038	7.40288	6.72253	7.31557	7.16413	7.5764	7.55366	7.61832	7.72484	7.22739	7.44017	7.59396	7.64549	7.64809	7.56369	7.05456	7.15323
Camta2	5.23136	5.22936	5.47193	5.24614	5.15111	4.59347	4.87507	5.50455	5.84096	5.39957	5.87849	6.01533	6.2937	4.8864	5.64963	5.6283	5.33674	5.04038	4.99476	5.35364	5.40045	6.28411
Cand1	9.92706	9.79399	9.76046	9.57167	9.81915	9.17908	9.81384	9.57471	9.45049	9.88763	9.76562	9.59274	9.44962	10.107	10.1201	9.82412	9.95355	10.1322	10.0624	9.54626	9.85598	9.36366
Cand2	7.29436	6.49571	6.21373	6.36925	7.59399	7.59304	7.47164	7.59206	6.98926	6.93631	6.88813	7.91046	6.46677	7.40572	7.48203	7.51868	7.61221	6.57588	7.1151	5.46705	5.62093	6.10498
Cant1	6.77071	6.46302	6.08835	6.0162	6.15753	6.28459	6.23355	6.71815	6.15299	6.76288	5.28805	6.95444	6.94535	5.76607	6.72669	6.66978	6.6169	6.39833	6.41075	6.10054	6.3843	6.4353
Canx	11.6889	12.1313	12.1213	12.3203	12.2242	12.8907	12.5784	11.7526	12.0594	12.4817	12.3417	11.9884	12.0473	13.0631	12.9307	12.7541	11.6489	12.3929	12.2807	12.7549	12.2004	11.9821
Cap1	9.16285	9.24861	8.92394	9.31464	9.58436	9.42747	9.21168	9.06652	9.27	9.04462	8.85922	8.0528	8.08321	9.05961	8.34307	9.19324	9.27431	8.77887	9.04494	8.37488	8.86729	9.8043
Cap2	3.27675	3.27282	3.27047	3.48709	3.27494	3.27206	3.26922	3.27276	3.27431	4.0106	3.26969	3.76965	4.2812	4.13684	3.35344	4.29134	3.6587	3.5268	4.2325	3.66331	3.56541	3.27714
Capg	7.89727	7.67179	8.36879	7.96375	8.46858	8.83496	8.45166	7.25298	7.341	7.79582	9.01639	9.08049	8.90471	8.75219	9.09086	8.46491	9.38315	9.09192	8.74537	8.76992	9.14732	9.86964
Capn2	9.24248	9.79634	9.54849	9.1154	9.1227	9.28181	9.38092	9.48121	9.29429	10.0107	9.34535	8.82904	9.29727	9.9296	9.58563	9.77922	7.95291	8.71178	8.71765	7.25803	7.96803	6.53176
Capn3	3.69243	3.32675	3.324	3.32585	3.3292	3.32585	3.32255	3.32668	3.32847	3.32874	3.3231	3.93347	3.83768	3.72169	4.06892	3.32273	4.51112	4.21296	3.34861	3.95928	4.48765	4.20207
Capn5	4.01945	4.13293	3.86969	3.87296	3.87888	3.87297	4.41813	4.13176	4.32343	4.48766	5.16248	5.17509	5.51027	4.24208	5.13013	4.7491	4.71758	4.85381	4.04615	4.37918	3.8828	4.27797
Capn6	3.40886	4.2363	3.39185	3.39619	4.45969	3.99122	3.38838	3.39813	3.40231	3.40292	5.19058	3.38901	3.39353	5.55327	4.28293	5.03967	3.39016	4.61602	4.7867	3.4501	3.40913	3.40989
Capn7	7.6334	8.74471	7.3912	7.58629	7.83567	8.56392	6.64087	7.7994	7.79928	7.88484	8.80578	8.49949	8.93893	8.39285	9.26954	9.21111	8.00234	8.94326	8.08429	9.4221	8.67056	8.01423
Capn10	4.73275	5.26478	4.90455	5.31025	5.36118	4.33662	5.29928	5.64197	6.03442	5.43261	5.63563	4.35652	5.31129	4.86897	4.99968	5.44702	5.47376	5.20493	4.57103	4.33945	4.60121	4.70897
Capn15	4.30655	4.5526	4.65491	4.34016	4.58054	4.48565	4.50756	4.68579	4.94725	4.70563	4.4669	4.55985	4.48568	4.2089	4.74864	4.49113	4.73265	4.57356	4.18833	4.17791	4.45065	4.521
Capns1	8.64318	7.83971	8.26457	8.17841	8.56589	8.417	8.37873	8.58737	8.68569	8.31737	9.04439	9.31095	8.6447	8.57288	8.34937	8.78057	7.59818	7.13486	8.30654	7.37602	8.01192	7.85573
Caprin1	10.9431	11.2456	11.2448	11.1509	11.2153	11.037	11.2409	11.2164	11.2444	11.5321	11.3762	10.9926	10.7533	11.4988	11.8451	11.7725	11.6283	11.8295	11.0543	12.016	11.5807	10.6297
Caprin2	4.12299	3.89919	3.4707	3.8228	3.54551	3.89524	3.46939	3.47309	3.4747	3.47494	3.86733	3.46963	3.47134	3.8118	4.47708	3.97312	3.71473	4.50872	3.70895	3.88757	4.47893	3.72841
Capza1	9.30722	9.70047	9.49041	10.2382	9.98883	10.3291	10.0896	10.1803	9.76951	9.71776	8.99012	8.94339	8.64128	10.0281	9.67843	9.90898	9.75104	9.83737	9.89641	10.2658	9.97178	9.74947
Capza2	11.5051	11.4933	11.6805	11.6274	11.4778	12.0446	11.7562	11.3009	10.9012	11.6136	11.6065	11.0932	11.2667	12.3162	11.8713	11.539	11.72	12.1863	12.0015	12.7007	12.7266	12.1436
Capzb	10.3589	9.96382	10.0241	10.5059	10.4095	10.5893	10.4727	9.96792	9.79636	9.96092	9.35568	10.1432	9.30778	10.1069	9.29625	9.70109	9.82823	9.5571	10.0766	9.87701	10.2053	10.4068
Car2	5.22468	6.62328	2.97532	6.55807	7.52809	7.39945	6.66306	4.6529	3.22334	5.24327	2.91461	4.48917	3.02017	5.93944	5.89858	3.7559	9.18446	9.85681	7.1964	11.212	9.96703	11.2395
Car8	7.92875	7.72181	7.64678	8.01255	7.31436	7.64397	7.5986	8.75355	8.24907	7.86751	8.07752	7.8621	8.32907	7.70646	7.54561	7.88233	6.05245	6.3229	7.00531	4.47176	4.56818	4.575
Car9	4.81345	4.65031	5.53221	4.72143	4.69421	5.31443	4.58883	4.98269	5.62576	4.76174	5.0713	5.50903	4.35939	4.53671	5.10345	5.16584	5.53209	5.00101	5.04474	5.35518	5.48751	5.34926
Car13	5.50736	5.49977	4.79368	5.60616	5.91761	4.57963	5.17952	4.74038	5.41734	5.39832	4.39704	4.56137	5.23337	5.19284	4.40263	5.71935	5.10194	5.17554	5.27143	6.02868	6.01616	6.16731
Car14	4.82921	5.31455	5.35415	5.75082	5.30187	5.05312	5.61586	4.3403	4.97104	4.57325	4.13059	4.15773	4.1341	4.70267	4.79564	4.72297	4.86476	5.33403	5.23233	4.13913	4.14854	4.14925
Card6	5.14275	5.54027	5.62062	5.27918	5.82301	4.42375	5.32035	5.02713	5.6533	6.22661	4.75106	5.60205	5.82846	5.06302	5.48613	5.6444	4.29888	4.53412	4.29715	4.27745	4.29093	4.29195
Card10	5.8691	6.69486	7.03786	5.81921	6.3074	5.80363	6.0123	6.9112	7.42522	6.58253	7.29902	6.92025	7.22257	6.39646	6.80681	6.44749	5.15716	6.11547	6.04585	4.58692	4.62511	4.62792
Card19	6.18301	6.00416	6.65814	6.24919	5.9432	6.72382	6.48646	6.139	6.06645	6.36311	6.58539	7.05985	6.66954	6.38655	6.57326	7.07512	7.32386	7.20545	6.7776	5.72507	6.36814	6.13185
Carf	5.95632	6.36115	7.02049	5.95179	5.98386	7.2669	5.45157	5.32025	6.24757	6.09334	5.1671	7.64253	6.34268	6.97474	7.08681	6.71487	6.21116	6.36654	6.9342	6.62977	6.39745	6.20853
Carhsp1	8.40592	8.72912	9.03535	9.14406	9.07902	9.23703	9.09816	9.04518	8.88623	8.80808	7.4836	7.48579	6.89931	7.7062	7.89192	7.14894	7.22409	7.17136	8.07052	6.30562	7.5051	7.15284
Carkd	8.54486	8.49438	8.82625	8.29757	8.56739	8.97624	8.3048	8.12039	7.91127	8.61695	8.93726	8.95549	8.74111	8.37031	7.65411	7.96201	8.81294	8.34956	8.7768	8.05795	8.54803	8.54334
Carm1	6.15217	5.71834	6.1701	5.97083	6.52627	6.05995	6.32082	5.85002	6.23495	6.11535	5.85389	5.89096	6.24924	5.31672	6.09945	6.33443	6.09646	5.96332	5.61758	5.57138	5.96873	5.86978
Carnmt1	7.03998	7.63343	7.34467	7.83384	7.00186	7.73124	7.68767	7.17904	6.97933	8.23451	6.46279	7.15271	4.58869	8.41604	7.94157	7.89498	8.30744	8.87314	7.78076	9.44318	8.26102	7.68398
Cars	8.21244	8.5662	7.93012	8.30438	8.0869	7.8222	7.98839	8.52235	8.47981	8.20771	8.20061	7.03089	6.92121	7.41533	7.51909	7.6516	7.87107	7.39658	7.76354	7.61687	7.59593	8.29228
Cars2	6.96532	7.24063	7.21409	6.59353	6.56909	6.87832	6.85724	7.34114	7.47539	6.32623	6.93098	7.05519	6.21419	6.35428	6.2393	7.13922	7.05177	7.04482	7.07623	7.52873	6.99935	7.38919
Casc3	6.40457	6.90891	5.58068	6.98556	6.64284	5.95046	6.2548	7.06307	7.44567	7.15734	7.12064	6.34547	7.36616	6.97547	6.88031	6.72745	6.72369	6.64641	6.66974	7.05072	6.26468	6.65141
Casc4	6.80588	7.45858	7.61143	7.31111	7.14954	6.86133	7.1463	7.10214	4.79078	7.00767	8.1094	7.80943	7.16679	8.05351	7.77297	7.77011	7.42561	8.14529	7.6641	7.10458	6.74416	5.82894
Casc5	8.7452	7.95089	8.18265	9.24237	8.6014	8.58313	8.31461	8.63534	8.33814	9.39383	6.55143	8.09714	7.54659	10.144	9.49032	8.21831	8.34433	8.65038	9.16354	10.9879	10.2103	9.043
Casd1	9.21918	9.4591	8.85058	9.25213	9.30964	10.0228	9.05686	9.35104	9.65644	9.91967	9.66924	10.0871	9.42001	9.86902	9.95983	10.0034	8.39164	9.23972	8.86676	7.68829	7.83542	8.1446
Cask	7.02259	6.63169	6.13091	7.84083	7.48051	7.42335	6.55131	7.06819	7.03278	7.68697	8.37006	8.27503	7.58623	7.35346	6.90241	6.7916	5.99422	6.82461	6.72287	6.36026	6.45385	7.27234
Caskin2	7.42935	7.61575	7.44353	6.97374	7.05612	7.11376	6.94609	7.46466	7.86439	7.41009	7.75899	7.77473	7.52974	6.48459	6.71578	7.0438	5.91486	5.88064	6.51058	4.91391	4.70263	5.21269
Casp2	8.54536	7.9589	8.46695	7.78227	8.73633	7.22253	8.48087	8.49545	8.47362	8.41254	8.83034	8.4656	8.19874	8.64011	8.90791	9.18826	8.79976	9.43752	8.48357	8.65774	8.2238	7.97616
Casp3	8.42012	8.70394	8.64133	8.4298	8.67669	8.70119	8.51171	8.88433	8.46993	8.88513	9.00939	8.8862	8.24816	9.00164	9.40275	8.84133	9.01139	9.36552	8.93686	10.3415	9.97592	9.3331
Casp4	5.54986	4.80757	5.04842	4.27104	4.28169	4.73509	4.48306	4.97363	4.4151	5.06324	5.5963	5.5915	4.93775	5.23343	6.23714	6.33202	5.7895	4.75584	5.46562	4.31893	5.16976	5.44939
Casp6	8.93194	8.87773	8.9203	8.52413	8.78629	9.32717	8.6125	8.23462	8.37213	8.19038	9.8311	9.58075	10.0288	9.54435	9.1388	9.3713	8.13636	8.94587	9.05153	8.3117	8.41554	7.66553
Casp7	7.96102	8.09539	8.55688	7.59414	8.1466	8.0981	7.89315	8.28096	7.65724	8.26452	7.74233	7.89681	8.63735	8.22707	8.50427	8.46917	7.31184	7.96196	7.47033	8.16055	7.59448	7.33477
Casp8	9.51585	8.88886	9.11105	8.68368	8.38141	9.50918	8.66234	9.08446	8.58207	9.14955	8.49428	8.4524	8.83975	8.93123	8.43701	9.65548	9.25452	9.55845	9.1415	9.14817	9.63265	9.37368
Casp8ap2	8.32921	8.63176	9.1294	9.10365	9.10728	9.08144	8.97556	8.71555	8.49539	9.66289	9.30653	8.98694	8.59849	9.57318	9.09383	8.01179	8.92991	9.44248	9.04709	9.77315	8.80102	8.7123
Casp9	5.87229	5.43044	5.97051	5.54024	5.7392	5.89457	5.96764	5.96351	5.98369	5.84354	5.77739	5.43934	6.45147	5.84614	6.24843	5.88614	5.48609	5.82849	5.50869	5.85611	5.89063	5.38522
Casq1	3.89145	4.14462	3.61565	3.58574	3.80811	3.70348	4.2212	3.61838	3.39693	4.10937	3.95493	4.13193	3.39425	3.48852	3.73569	3.56077	3.49592	3.39221	3.63047	3.39591	3.39905	3.39928
Cast	8.73605	8.81599	8.43353	8.19014	8.22271	8.63396	8.73902	7.95081	8.08948	8.51536	9.12971	9.27317	9.4389	9.58808	9.17095	9.6276	7.86362	7.9685	8.74432	8.14814	8.68719	8.46067
Cat	9.99091	9.9892	9.75635	9.75954	9.53529	9.55316	9.8043	9.47461	9.22237	10.5545	10.222	9.54095	10.13	10.0223	10.1623	10.6437	9.18622	10.381	9.373	9.96258	9.47188	9.95866
Cav1	11.5535	11.8087	12.3066	8.20347	8.51799	5.79169	7.93143	9.52808	8.63717	10.1254	12.1447	11.8699	11.8629	9.84204	7.91021	10.62	3.5485	3.42222	8.84511	8.10745	6.10514	4.06995
Cav2	9.73961	9.64511	10.5391	8.58211	8.82313	9.73591	8.84709	8.68967	8.23556	9.26345	10.3535	10.9587	10.6423	10.4027	10.2064	10.681	6.70181	3.75467	8.68717	6.38297	6.78323	4.58191
Cbfa2t2	6.18228	7.37601	6.43462	7.52025	7.22632	7.74906	7.27263	6.68249	7.06988	7.66139	7.72841	7.41869	7.18615	7.43262	5.82056	5.69791	7.03882	7.63715	7.39077	7.29554	6.20922	7.49108
Cbfa2t3	7.04192	6.65438	6.76716	7.03183	7.52919	7.32269	7.29487	7.36247	7.10619	6.73438	8.587	8.61962	8.42476	7.87905	8.28169	8.4129	8.05477	7.98495	8.17466	6.99664	7.42182	7.53044
Cbfb	8.9316	8.5756	8.39179	9.11814	8.96025	9.41861	9.16384	8.92987	8.36503	9.08779	8.59739	7.84066	8.91391	9.32773	9.8022	9.00573	8.58436	8.57323	9.32511	8.33013	8.90974	8.0011
Cbl	7.42675	5.88665	6.62738	6.84698	6.25625	6.80026	6.8068	7.14013	6.32038	6.19048	7.25337	6.66773	6.20793	6.73102	6.16183	6.85757	5.99383	6.79485	6.51209	6.46979	7.10432	7.21836
Cblb	6.56943	7.03058	6.56553	6.31993	6.53709	6.76984	6.07589	6.9814	6.43695	6.60348	6.59183	6.0313	7.54524	6.64249	6.66266	7.0471	6.52849	6.38929	5.74077	6.04938	6.53972	5.92914
Cbll1	8.18152	7.47437	8.30783	8.40854	7.85063	6.88295	8.30697	8.67895	8.36102	8.73918	8.53199	8.64272	8.86804	9.28005	8.89535	9.09811	8.55683	9.33804	8.3637	8.31042	8.18312	7.93497
Cbr1	7.49293	7.55016	7.7651	7.00831	7.27064	7.24962	7.28953	7.59887	6.91539	7.41137	6.74442	7.34998	7.29437	6.63013	6.9931	6.99273	7.35174	6.97162	6.91049	6.56201	7.17892	6.90679
Cbr4	6.76031	7.14016	6.65288	6.44074	6.77189	6.50386	6.68638	6.84636	5.84532	6.61142	6.69162	6.82357	6.37149	7.33652	7.48998	7.48193	6.6299	6.38522	6.60027	7.87703	7.54225	6.89878
Cbs	3.31653	3.72581	3.234	3.23535	3.75098	3.23535	3.25462	3.23595	3.23727	3.39563	3.94768	3.61641	4.24237	3.57019	3.48607	4.2116	3.42067	3.23241	3.23326	3.23623	3.66965	3.80944
Cbwd1	7.42282	7.50713	7.62201	7.39864	6.93702	7.6695	7.53568	7.58174	6.40583	7.67661	7.29415	7.57238	7.1943	7.08367	8.1216	8.30714	7.6358	7.01222	7.73408	8.06375	7.59767	6.74504
Cbx1	8.76032	8.8159	8.58551	9.04633	8.91467	8.91043	9.11552	9.00295	8.05421	7.81513	8.42925	8.43422	8.81515	8.79774	8.096	8.45986	8.28427	8.25366	9.11766	8.22115	8.43576	8.08333
Cbx2	5.15658	5.69527	5.33719	5.70251	5.84432	4.88479	5.59745	5.02582	6.10706	5.53258	5.84192	5.07193	4.96496	5.29539	5.08556	5.15388	5.21493	4.79	5.14271	4.95799	4.64875	4.69069
Cbx3	8.35037	8.37438	8.42891	8.68528	8.68393	9.59109	8.80742	8.26604	8.55761	9.18237	8.18198	8.66131	8.47927	10.0604	9.49018	9.49069	9.14353	9.82743	9.43372	9.47552	8.6082	8.13551
Cbx4	5.60636	5.32374	5.30308	4.36872	4.38002	4.98412	5.64994	5.12694	4.37757	4.37846	6.01543	5.57597	6.25032	4.62452	6.09767	5.35489	4.75701	4.9877	5.33951	5.76576	5.61079	6.11298
Cbx5	10.5853	10.7106	10.651	10.9494	10.7309	11.1166	10.5933	10.7285	11.0042	10.8515	10.1405	10.3957	10.3368	10.8673	10.9574	10.3838	11.0186	10.9566	10.8549	11.15	11.1322	10.8538
Cbx6	5.13919	5.11121	5.02671	5.01389	5.11918	5.35188	4.85199	4.45316	5.18599	4.61077	6.06717	6.01946	5.8441	4.92249	5.29883	5.75929	5.33484	5.07205	4.94433	5.21569	5.41402	4.68466
Cbx8	4.67019	4.87794	4.71895	4.06946	4.85628	5.08812	4.42367	3.93204	4.34725	4.03756	3.92738	5.05403	4.36722	4.23963	3.92976	3.9269	4.53689	4.2105	4.46557	4.5779	4.45452	4.22597
Cby1	6.9802	6.82337	7.27945	7.08782	7.1183	6.24	6.77702	7.47763	6.87611	6.82468	6.85974	6.8097	5.94774	6.68329	6.17675	6.61248	6.73207	6.55923	6.78616	6.36436	6.27814	6.94907
Cc2d1a	4.32542	4.63551	4.42611	4.09082	4.68742	4.75362	4.79241	4.78196	4.68386	4.69108	4.84461	4.55169	4.60223	4.42908	4.56804	4.80119	4.70227	4.4354	4.44342	4.09221	4.16983	4.91308
Cc2d1b	4.3505	5.26084	5.27208	4.67151	4.24545	4.5243	5.21862	5.39536	6.27091	5.59292	4.22936	4.95636	5.20308	4.22348	5.19022	5.49188	4.22988	4.79342	4.84378	5.24875	5.26849	5.31204
Cc2d2a	5.45737	5.17857	5.66405	6.06988	5.68773	4.50499	4.79869	5.96527	5.87188	6.08843	6.09413	6.39008	6.41084	5.8445	6.50276	5.60728	5.10611	5.70271	5.64314	4.64179	4.69176	4.52962
Ccar1	9.98331	10.14	9.75499	10.1812	10.3723	10.3102	10.2767	10.4126	10.1838	10.5953	9.91864	10.2985	10.4144	10.8125	10.3827	10.3661	10.0127	10.7371	10.253	10.3185	10.1936	9.93392
Ccar2	7.58531	7.38325	6.86746	7.13016	6.44536	6.83345	7.03972	7.61942	7.64185	7.768	7.0672	6.44562	7.33528	6.98587	6.5566	7.4865	7.6036	6.99946	6.9672	6.22978	6.79389	6.53156
Ccbl1	3.94699	4.37207	3.93691	3.93945	4.11725	3.93946	3.9349	4.21814	4.04663	4.95077	4.95409	4.36268	4.96694	4.15723	3.93818	4.5777	4.66915	4.81266	4.53041	5.11681	4.97053	5.21665
Ccbl2	5.1226	5.35762	4.95207	5.15712	6.05718	4.92041	5.29388	5.19186	5.64119	4.29107	5.49484	4.26508	4.27356	4.28784	4.86497	4.26472	5.81844	5.79479	5.6794	6.41131	6.71589	6.15169
Ccdc6	8.06593	8.6809	8.26451	8.87431	8.4034	9.20192	8.80338	8.49916	6.73251	8.07779	8.59585	7.84845	7.71347	8.40605	7.88259	8.36339	8.35558	8.4971	8.47574	8.96896	8.32413	8.35835
Ccdc9	4.57742	4.69543	4.55073	4.56616	4.56042	4.70091	4.94721	5.46853	5.50193	4.28617	4.58344	4.38633	4.1432	4.3294	4.60953	4.74667	5.06358	4.67498	4.96159	4.44966	4.94859	4.81171
Ccdc12	8.79916	8.94379	8.69249	8.58751	8.69765	8.79319	8.65761	8.96315	8.74208	8.71728	8.81669	8.31962	8.53859	8.38839	8.60402	8.59259	9.13537	8.75634	8.92903	8.22216	8.70506	8.83749
Ccdc14	6.11361	6.22125	5.28999	6.09841	6.14842	5.63969	6.34189	5.13779	6.21217	7.0026	5.34492	6.72126	5.8263	5.65238	6.24251	6.62539	6.20961	5.67284	5.90365	5.72185	5.5242	6.56207
Ccdc15	4.4054	4.32556	4.04314	4.63072	4.44537	4.45013	4.19242	4.40863	4.51486	4.52118	4.04249	4.04228	4.46091	4.51453	4.10157	4.19511	4.65907	4.74667	4.47994	4.90159	4.95227	4.45586
Ccdc18	6.30491	6.87748	6.98563	6.83605	7.43923	6.93602	6.94275	6.77947	7.14386	5.04009	7.31814	7.0355	7.20532	8.18628	7.22151	7.96686	7.15865	8.00596	8.21404	7.73873	7.05832	7.20858
Ccdc22	6.57551	6.02016	5.62733	6.14804	5.47852	5.02342	5.40731	6.36801	6.39957	5.72385	6.03542	5.52031	5.6373	5.36278	5.83872	5.85147	6.14264	5.94208	5.55364	5.76739	5.94096	6.20083
Ccdc25	8.48271	8.277	7.89512	8.72256	8.72579	7.48968	8.6371	9.10216	8.30936	8.11344	8.20795	8.19007	9.1607	8.86727	8.56403	7.68358	8.45798	8.26963	8.46176	8.65582	8.15184	8.84816
Ccdc28a	3.82529	3.80012	3.72107	3.64793	3.97559	3.53284	3.8749	3.53338	3.90613	3.62015	3.86463	3.95326	4.02445	3.52959	3.80331	3.53079	3.78671	3.75634	4.0358	4.05152	4.17857	4.23318
Ccdc28b	6.93365	6.78893	6.79611	6.68653	6.28082	6.46574	6.80303	6.86158	7.28155	7.01645	6.80167	6.71297	7.07154	6.92946	6.72201	6.72511	6.83996	6.92743	7.00929	6.68781	6.84238	7.23702
Ccdc32	6.97601	7.28609	7.19868	7.00513	7.03247	6.77738	6.87749	6.80227	6.61657	7.08709	7.43582	6.63583	7.8396	6.5905	7.17113	6.95517	7.33495	6.86034	7.01037	7.51373	7.25312	6.95665
Ccdc34	7.74368	7.49803	7.18132	7.84489	7.51018	7.84916	7.68636	8.0794	8.22339	7.67624	6.70491	7.36461	7.01809	7.66817	7.90049	7.62462	7.85878	8.19914	7.55173	7.70894	7.63753	7.58327
Ccdc39	4.02108	4.13777	3.96805	3.71407	3.81952	4.1508	3.71064	4.23896	4.19724	4.42362	4.68099	4.57413	4.87351	4.41507	4.35215	3.71083	3.93653	3.92477	3.94833	3.91075	3.9021	3.72023
Ccdc40	3.37774	3.88411	3.72469	3.35096	3.29512	4.03434	3.45523	3.41245	3.29451	3.29473	3.28998	3.28974	3.29134	3.61601	3.39753	3.28967	4.23468	4.53869	3.94333	3.95442	3.63933	3.52297
Ccdc43	8.72602	8.02144	8.60249	8.25403	8.30228	8.59225	8.6354	7.89544	8.0702	8.84544	8.15927	8.12981	7.32343	8.08594	7.64985	8.82634	8.75777	8.49097	8.48871	8.743	7.91168	7.91725
Ccdc47	9.19745	9.67714	8.9546	9.11112	9.52227	9.73861	9.26316	8.994	9.15174	9.1288	9.88515	9.30364	9.27489	9.9896	9.27108	9.47937	8.82946	8.98635	9.01117	8.92105	9.07093	8.88256
Ccdc50	9.15229	9.24299	9.34268	9.0021	9.12956	8.00787	8.99083	8.79991	8.99109	9.29213	9.03383	9.7229	9.0165	9.64107	9.53084	9.76413	9.19257	8.98059	9.05682	10.1899	10.0179	9.33557
Ccdc51	5.92213	5.46664	5.14308	5.40208	5.84937	5.90012	5.4265	6.20136	4.63425	6.0859	5.24582	4.86151	5.13205	5.26243	5.78057	5.63059	5.83401	5.56741	5.61967	5.60218	6.0069	6.18241
Ccdc53	8.3243	8.0265	7.83537	8.21037	8.18484	8.15953	7.97784	8.19539	7.52165	8.1585	7.51411	7.73525	7.95627	7.89322	7.49086	7.91066	7.79351	8.27323	8.46097	8.39981	8.16005	8.31573
Ccdc57	4.14534	3.91829	4.31396	3.90197	4.41122	3.64504	3.61687	3.91702	4.29881	4.14052	4.13558	4.12512	3.64206	3.90466	3.66582	3.67508	4.35552	3.91866	4.01511	3.62035	3.62375	3.87864
Ccdc58	8.68317	8.4733	8.58007	9.15105	8.79925	8.91838	8.76067	8.37672	8.4089	8.06972	7.86184	8.13753	7.84589	8.90477	8.59799	8.67256	8.49887	8.65619	8.69375	9.41348	8.74204	9.08553
Ccdc59	8.1446	8.18396	7.95384	8.63206	8.42799	8.68788	8.15888	8.22235	8.0238	8.60152	8.57576	8.3626	8.08008	8.71795	8.42727	8.43406	8.36086	8.49929	8.54192	8.7901	8.16276	8.56274
Ccdc60	5.18771	6.27542	5.10773	4.24917	4.01064	4.48017	4.14278	5.04081	4.83944	4.35373	6.21487	7.02604	6.4596	4.63839	5.7732	5.80097	4.70184	5.10453	4.92784	3.99883	4.02261	4.02438
Ccdc61	5.80205	5.82093	5.64589	5.20367	5.43572	5.20378	5.29463	5.31677	4.83977	5.20458	5.30256	5.43548	4.51765	5.34678	4.70557	5.71918	5.53631	5.08162	5.28772	5.11902	5.43606	5.21362
Ccdc62	3.83195	3.56274	3.56036	3.58965	3.56488	4.10967	4.05096	3.56268	4.35598	3.66063	4.17153	4.26703	3.58641	3.90068	3.74711	3.86165	3.60428	3.68656	4.2185	4.16018	4.55207	4.23987
Ccdc66	7.33937	7.65258	6.87439	7.38947	7.6617	7.77823	6.6537	7.5673	7.53946	8.17292	7.25503	6.56405	5.45207	8.06225	6.3689	7.82094	7.15932	7.6577	7.42103	7.58363	7.2528	7.08764
Ccdc69	3.99663	4.88281	3.98241	3.98602	4.25688	4.5756	4.39885	3.98763	4.03299	4.33959	5.81228	4.89999	4.73329	5.01867	4.47428	5.14188	4.06528	4.62982	4.34382	5.14082	4.82138	5.20453
Ccdc71	6.59474	7.27003	7.17743	6.2872	7.28382	7.66041	7.38703	6.59525	6.72268	6.45009	6.84137	6.68576	6.23348	6.24449	6.41455	6.55556	6.85692	6.35287	6.37662	6.25043	6.73885	6.82731
Ccdc71l	5.45753	5.00439	5.6803	4.76081	4.95543	4.95458	5.36525	5.92078	4.51789	5.31227	5.16523	5.83013	6.23031	6.22758	5.94199	6.56376	5.12591	5.40153	5.46994	6.57358	5.44117	5.73369
Ccdc77	6.70925	7.19033	6.65268	7.33246	6.90579	6.88699	7.38991	7.46977	7.72036	6.94547	6.62515	6.82284	6.22289	8.01733	6.91936	5.56866	7.41304	7.10969	7.61417	7.19125	7.39828	7.15837
Ccdc80	5.09055	6.96471	7.6956	6.69368	7.17705	5.38767	6.41308	7.0235	7.09002	6.30603	9.32645	8.06675	9.06266	7.56535	7.16085	8.01723	6.83887	6.3735	7.60269	5.66923	6.26147	4.40926
Ccdc82	7.60065	7.37544	7.13082	7.21726	7.72885	8.26939	7.97537	7.8955	7.1321	7.43008	6.98069	7.47497	7.03832	7.74106	7.84514	7.83036	7.03839	7.42871	7.69699	8.68214	8.07052	7.41423
Ccdc84	5.81619	5.93666	5.70952	5.53305	5.53777	5.55877	5.8414	5.83941	6.06085	5.40289	5.86868	5.74618	5.58154	5.20059	5.7933	5.58674	5.85131	5.358	5.62911	5.56641	5.98188	5.38412
Ccdc85b	8.79635	8.74254	8.61215	8.11792	8.07988	8.05215	8.13974	8.49009	8.65757	8.48019	8.57792	8.14923	7.53437	7.9186	7.87244	7.16717	7.88969	7.8049	7.73118	6.90284	5.40915	6.07777
Ccdc86	8.46365	7.91118	8.42394	9.19848	8.99721	8.60994	8.83388	8.90318	9.05742	8.31647	7.79351	7.40334	6.52637	8.28282	7.90282	7.79357	8.82743	8.56705	9.08576	8.15964	8.45797	8.38787
Ccdc88a	8.32258	8.43815	8.71523	8.2602	8.75579	8.4513	8.77237	8.34644	8.76739	8.83282	9.01159	9.51666	9.45991	9.37845	8.71601	8.68374	8.06922	8.38109	8.43808	8.19062	7.32915	7.79255
Ccdc88c	4.3542	4.82414	4.25131	3.89968	4.14699	3.89969	3.89591	4.26053	4.54872	4.23749	4.96605	4.56661	4.77582	4.02839	4.55517	4.72313	4.16976	4.44365	4.3504	4.46091	3.94537	4.15132
Ccdc90b	8.41136	8.07094	8.09513	8.15863	8.33808	8.65494	7.82749	8.36185	8.09564	8.75058	8.48652	8.82515	8.76468	8.9759	8.91822	9.3179	7.61736	8.74822	8.73189	8.73961	8.83671	8.10462
Ccdc91	6.72154	7.16349	6.87414	6.20493	6.84862	6.6422	6.68181	6.97735	5.30209	6.25125	7.19797	6.80044	5.88655	6.93348	6.13045	6.43586	6.56486	6.43779	6.28952	5.6046	6.64608	6.20061
Ccdc93	5.50768	6.72031	5.91911	5.90983	5.74434	5.52122	5.8492	6.20429	5.92611	5.99802	5.2306	5.57653	5.68325	5.7943	5.87336	6.00328	6.43312	5.5356	6.42648	5.78868	5.90289	6.38959
Ccdc94	6.05381	6.01027	5.87193	6.28274	6.44726	5.75182	5.98247	6.58024	6.61495	5.54583	5.78137	6.11219	5.9097	6.00179	5.67044	5.61758	6.37264	6.12387	5.96234	5.77464	6.04423	6.15078
Ccdc97	6.5657	6.71847	6.05737	6.27814	6.11514	6.16028	5.48699	6.22409	6.63903	6.66048	6.47334	6.41554	7.03879	6.11036	6.03536	6.48135	6.63873	6.13922	5.55603	5.95186	6.43364	6.14398
Ccdc102a	6.18734	6.95694	6.77708	6.11022	5.74633	5.98718	6.15861	7.03207	6.25634	6.50202	6.97989	6.16257	6.66659	5.27673	5.58744	5.88362	6.41218	6.23011	5.97983	5.99793	4.78375	5.61146
Ccdc107	6.75651	6.15499	6.38322	6.64835	7.03587	6.78749	6.53803	6.90488	6.59068	6.60399	6.59955	6.94836	6.95221	6.76861	6.08948	6.19904	6.97845	6.43548	6.84452	6.33494	7.18354	6.70378
Ccdc112	3.74441	3.89793	3.87525	3.84056	3.90813	3.66348	4.05716	3.96133	3.66597	4.08382	4.35727	4.46844	3.9792	4.92277	4.39307	3.95011	4.06649	4.16143	4.22933	3.66462	3.78042	4.0237
Ccdc114	3.04882	3.49714	3.04505	3.14338	3.36307	3.046	3.04431	3.07349	3.04735	3.04749	3.56856	3.17391	3.35496	3.5484	3.78314	3.79344	3.29437	3.16232	3.22631	3.15207	3.34967	3.04906
Ccdc115	7.61187	8.34389	7.89833	8.15901	8.11233	8.37397	8.00699	7.95813	7.51128	8.16603	7.95513	7.12044	7.91859	7.37884	7.71743	7.71065	8.53792	8.83398	7.91863	8.38625	8.12751	8.91252
Ccdc117	6.80676	7.8388	8.03632	7.23276	7.25639	7.79595	7.41211	6.24383	7.71349	7.57023	7.38718	7.5424	6.36964	7.97442	7.26204	7.6838	7.68353	7.6097	7.53777	7.82448	6.29541	6.88165
Ccdc124	8.59609	8.62348	8.55112	9.23803	8.90483	9.33213	9.31079	9.15841	9.00712	8.49614	8.41316	8.07216	8.32878	8.54732	8.07746	8.21122	8.88277	8.11437	8.85537	7.92406	8.17314	8.38663
Ccdc125	5.45443	5.70636	5.25859	5.80196	5.67335	4.56673	5.49245	5.1964	5.58021	5.26484	5.41059	5.40366	5.02459	5.36844	5.06211	5.14598	4.70526	5.28952	5.26536	5.17881	4.95442	4.90627
Ccdc126	6.39631	6.79077	6.86271	6.86957	5.99459	7.04129	7.06418	5.98277	5.51698	6.18428	7.16745	6.26226	6.15376	6.32993	7.33623	7.18422	6.31337	6.60734	6.26741	6.75194	6.54105	5.44738
Ccdc127	8.77591	8.45944	8.25676	9.08257	8.78319	8.89561	9.15419	9.07888	7.94988	9.22246	9.03355	8.32992	9.22272	9.40956	9.11263	9.15542	8.46473	8.91755	8.99486	8.94815	8.71925	8.4467
Ccdc130	7.11546	6.86303	6.3398	5.59777	5.63196	6.19684	6.13102	5.99824	4.72555	6.70707	4.69042	5.53271	6.99463	6.48744	6.64256	6.07972	6.26822	6.0384	6.26162	5.73853	6.56837	6.4715
Ccdc134	5.39215	5.69106	6.1257	5.32808	4.46365	5.4736	4.72763	5.307	6.30779	5.01915	5.35802	4.94689	5.15698	4.6852	4.76242	5.1131	5.6239	5.39631	5.08561	5.79676	5.36044	5.45759
Ccdc137	7.08077	6.93812	6.45577	7.29697	7.19326	7.25537	6.75917	6.94144	7.56728	6.62182	7.72809	7.40857	6.82754	7.11182	6.97322	6.91897	7.19357	7.37807	7.11773	6.58938	6.59141	6.79104
Ccdc138	4.99052	4.67582	4.42939	4.42341	4.54533	4.83575	4.35559	4.287	5.54571	4.3731	4.04722	4.02125	4.85717	4.89216	4.13675	4.34429	4.89015	4.20266	4.71515	4.09518	5.20272	4.60488
Ccdc157	4.1671	4.1678	3.70829	3.5378	3.7087	3.53781	3.53282	4.10852	3.54174	3.54214	4.85293	5.11287	5.02569	4.15942	4.07321	4.57962	3.56384	3.53174	4.28668	3.78153	3.54617	3.54666
Ccdc160	3.71385	3.3532	3.55732	3.80992	4.07618	3.35269	3.75261	3.55982	3.35421	3.71112	3.97395	3.553	3.37439	3.83813	3.51786	3.90389	3.64864	3.58897	3.52564	3.35338	3.56935	3.35613
Ccdc163	7.23446	6.53035	6.74372	6.56685	6.76024	6.97024	7.02929	6.41867	7.10115	6.31157	6.09315	7.09549	6.52922	5.76861	6.25746	6.59958	6.67934	6.57528	6.23623	6.70268	6.76558	6.66542
Ccdc166	5.22308	5.97586	5.9769	5.21553	5.61683	5.77257	4.93397	5.39155	4.85939	5.61345	5.71909	5.77033	4.63166	5.37218	5.70709	5.48521	6.06497	5.95023	5.76739	5.81035	5.65076	5.69243
Ccdc167	3.70732	4.04905	3.46973	3.75183	3.77043	4.12441	3.69	3.65331	3.87135	3.72158	3.54261	3.54058	3.6114	3.65759	3.99384	3.67951	3.76038	3.54913	3.8175	3.99221	3.84826	3.5722
Ccdc173	3.53345	3.52985	3.78434	3.74098	3.76348	3.52915	3.93291	3.63688	4.28934	3.62408	4.35423	3.76094	3.52826	3.73535	3.91779	3.86088	3.75423	3.98824	3.64582	4.35764	4.27801	4.11526
Ccdc174	6.94252	7.21814	6.96626	7.41401	6.97056	7.39382	7.3699	7.06036	7.83573	7.30764	7.16476	7.25001	7.43047	7.68142	7.70472	7.05468	7.20631	7.0516	7.14641	7.25076	6.91395	7.18652
Ccdc180	3.07664	3.23401	3.24406	3.0371	2.91966	2.90883	2.95645	2.86875	2.86927	2.86935	3.20032	2.88345	2.86818	2.90544	2.92409	3.15918	3.17224	3.12745	3.07009	2.93388	3.18377	3.10404
Ccdc181	4.80618	5.80136	5.42467	4.94736	5.07158	5.41038	5.94416	6.09864	5.63682	5.49678	6.04892	6.14544	6.06053	5.90684	5.35843	5.92855	5.76384	6.55869	5.8317	6.19077	6.02279	5.7215
Ccdc186	6.50322	6.47626	6.43352	6.29866	6.59339	5.0659	6.17681	6.28458	6.22947	6.05269	6.49588	6.94769	6.15466	6.39351	5.62156	5.89265	5.00665	5.15038	5.33199	6.28663	6.29381	6.50358
Ccdc191	5.88918	5.58516	5.60207	6.21684	5.82492	5.73647	5.84407	5.32188	5.79637	6.15635	5.52223	5.30907	6.51677	6.0208	5.37364	6.21051	6.04235	5.57641	5.67216	5.7643	6.4176	6.01572
Cchcr1	4.86196	4.55669	4.80885	4.23752	4.65307	4.53415	4.32597	4.90307	5.25426	4.81795	4.66431	4.36349	4.68756	4.52404	4.75636	4.40753	4.77875	4.12228	4.26534	4.45244	4.5127	4.89044
Ccl25	4.3144	4.97622	4.95287	4.95929	4.94233	5.08467	4.99565	4.75044	4.40697	4.8014	4.30168	4.74607	5.07222	4.82944	4.59752	5.04278	5.10733	4.89281	5.09305	5.39904	5.13815	5.60149
Ccm2	8.29362	8.23544	8.49201	8.37771	8.68608	8.72612	8.58994	8.29016	8.46653	8.30843	8.93706	8.62068	8.15277	7.89346	8.26332	8.47226	8.4096	8.12663	8.52766	7.69682	8.69565	7.61179
Ccm2l	6.41186	7.01936	6.92931	6.53092	6.87076	6.48312	6.51856	7.27235	7.05736	6.69818	7.51327	8.02669	7.96191	6.49629	7.15807	7.58576	6.06865	6.16392	5.89432	4.56471	4.61994	4.62395
Ccna2	10.7481	10.0887	10.1788	10.5225	10.3087	9.8808	10.5123	10.717	10.3156	10.2028	8.075	8.98487	8.63036	10.6917	10.0776	9.84463	10.8672	10.3165	10.4902	11.2728	10.6477	11.1218
Ccnb1	10.9267	10.4507	9.764	11.2539	10.6404	10.5431	10.8074	11.0708	10.211	10.1983	4.12479	9.14834	6.87471	11.6626	10.0217	10.2173	10.875	9.65909	11.5641	11.3996	11.0633	11.3151
Ccnb2	10.3893	10.0052	9.93707	10.6186	10.4218	10.7471	10.4889	10.5707	10.302	9.59437	8.32935	8.6525	9.30495	11.2865	10.3051	10.3548	10.2476	10.5251	10.8246	10.5982	10.601	10.7501
Ccnc	8.04174	8.28387	8.44878	8.74751	8.92647	9.09329	8.4166	8.07383	8.20771	8.5512	8.10398	8.99672	7.62332	9.25441	9.46178	8.76329	8.56021	9.04886	8.84321	8.85955	9.2654	8.31604
Ccnd1	9.64151	9.53192	9.12895	9.54962	9.13519	9.09414	9.62316	9.65863	9.53632	9.52534	5.52186	7.52631	5.71249	7.50094	7.27145	7.72734	6.80502	6.96161	6.46734	6.46423	6.78096	6.74629
Ccnd2	9.93329	9.85169	9.89055	9.48352	9.61195	9.16539	9.75234	9.98443	10.8248	10.3986	10.0118	9.59321	10.0597	9.4692	10.2062	9.91991	10.7777	10.6932	9.95831	8.09372	7.69568	8.44318
Ccnd3	10.051	10.1534	10.0367	9.92968	10.0171	9.49326	10.0469	10.504	10.0141	10.5151	9.98245	9.4822	9.7744	9.15285	9.74108	9.72516	10.8095	10.6076	9.92232	8.80232	8.87786	9.72979
Ccndbp1	7.61073	7.0571	7.91662	7.47004	7.62403	7.19309	6.47271	7.17271	8.03558	7.36217	8.00225	8.29504	7.70516	7.53231	7.80963	8.1786	7.51923	8.17339	7.57435	7.99003	8.74031	7.79238
Ccne1	7.53009	8.01387	8.00131	7.39925	7.73222	7.94533	7.75608	7.3603	8.35683	7.51172	8.36559	6.38882	5.69514	7.53162	7.8069	7.568	8.24114	8.47646	7.79464	8.35918	7.62829	8.08019
Ccne2	7.1361	7.15156	7.52109	7.00568	7.62472	8.58356	7.56656	6.56971	6.33174	7.62863	7.24849	6.7963	4.92768	8.01282	7.33657	6.3141	7.75328	8.1766	7.59325	8.36912	7.3655	6.91591
Ccnf	9.18603	8.51163	7.39538	8.74062	7.53547	7.29012	8.17862	8.1869	9.11532	8.44737	6.81467	6.98619	8.06908	9.00649	8.04912	8.13443	9.10067	7.81936	9.11584	8.76696	8.49572	8.99296
Ccng1	8.21704	8.73539	7.85948	7.90848	8.05112	8.33999	7.99891	7.99801	8.03373	8.98047	8.12259	7.90527	7.54773	8.59637	8.78795	9.03802	8.50206	8.80159	8.74239	9.05582	9.27805	8.38938
Ccng2	6.54725	7.69293	7.92529	7.10758	6.95281	5.99745	6.52186	7.05918	6.87378	8.02869	8.10046	9.05471	9.14177	7.78887	8.52498	8.63287	6.49098	6.46543	7.4748	7.89634	8.03215	6.97414
Ccnh	8.75626	9.04816	8.72726	9.37159	8.90934	9.18162	8.89256	9.17424	9.4348	8.98433	8.73987	8.13996	8.83682	9.44899	8.45596	9.62531	9.41595	10.0986	9.72766	10.8384	9.85325	9.81143
Ccni	8.02632	7.74054	8.34119	8.36247	8.32104	8.68223	8.43788	8.16343	8.2664	7.94229	8.9149	8.49683	9.23511	9.04183	8.51707	9.33633	8.37162	8.41904	8.5927	8.20914	8.7089	7.91814
Ccnj	6.24041	6.4182	6.62385	5.89938	5.79342	6.06828	6.01653	6.18734	6.44	6.66482	6.59292	6.7157	7.16729	6.19475	7.21087	6.94127	6.84995	7.61628	6.53597	5.00002	6.38847	5.6005
Ccnjl	6.93282	7.33725	7.08916	6.96662	7.27107	6.54806	6.78522	7.04577	6.62696	6.3706	6.95837	7.21833	7.84032	6.54023	6.8532	6.52158	5.63373	5.90365	6.69332	4.74185	5.51657	5.4108
Ccnk	5.98933	6.73832	6.14509	6.41039	6.64369	5.8342	6.2119	6.48434	6.79818	6.59259	6.5206	6.95872	6.73614	6.91821	6.10886	6.80517	6.55441	6.34385	6.1807	6.74162	7.06423	6.79211
Ccnl1	9.70889	9.63734	9.86442	8.95812	9.29391	8.94236	9.4573	9.85034	10.4027	10.1207	10.1693	10.2427	9.99625	9.83921	10.5766	10.312	9.62643	10.4312	9.47976	10.0739	10.0168	9.88518
Ccnl2	9.63656	10.075	9.89085	9.40172	9.50019	9.48806	9.67998	9.78342	10.3314	9.91451	10.2521	10.2593	10.5104	9.73037	10.9771	10.5733	9.76371	9.81817	9.12492	8.91208	9.81615	9.19163
Ccnt1	7.63426	7.96158	8.18204	8.12238	7.75237	7.33836	7.45682	8.2159	8.64388	7.56715	7.90211	7.59915	8.09673	7.34147	7.56555	7.31292	7.72419	8.07506	7.38476	7.92894	7.68404	7.93198
Ccnt2	7.90742	8.36953	8.86548	8.21715	8.78449	7.76659	8.32704	8.34979	8.23129	8.62256	8.76592	8.93374	8.56078	8.41738	8.92073	8.54562	8.14902	8.90116	7.87278	8.48836	8.82921	8.17989
Ccny	8.32165	8.09784	7.93429	8.1233	8.10853	8.37112	7.87221	8.23937	7.89287	7.11879	7.60577	7.66235	8.18767	8.59726	8.03652	8.69717	7.54685	7.12432	7.92149	6.82116	7.49421	8.20041
Ccnyl1	6.90891	7.05086	7.34911	7.38	7.29772	7.09899	7.68454	7.49317	7.40244	7.29115	8.23136	7.51982	8.31691	7.72729	8.44925	7.95314	5.56377	6.11319	6.89938	5.45023	6.85411	5.75059
Ccp110	5.88986	5.16059	6.30763	5.73601	5.81355	6.00602	6.30798	6.55367	6.13153	6.49355	5.68979	6.32757	5.93664	5.76823	5.91703	5.53738	5.98365	6.2647	5.96561	6.15507	6.56486	5.61811
Ccpg1	6.69355	7.02284	6.98339	6.1137	6.38143	5.80607	6.6115	5.95805	5.73029	7.23687	8.60559	8.33277	8.25137	7.09041	7.6873	6.89282	6.62718	7.22693	6.67378	7.45459	7.34797	6.87833
Ccpg1os	3.94383	4.54408	4.30393	4.10616	4.0547	3.86113	3.90002	4.39707	4.86683	4.22223	4.91223	4.43625	4.19778	4.10511	3.86009	4.92917	4.33551	4.11422	4.38686	4.30603	4.34168	4.25193
Ccrl2	3.3961	4.61081	4.67832	3.37557	3.38829	3.37559	3.3626	3.37875	4.72721	3.97593	4.49193	3.36366	3.37118	4.10293	4.1042	3.36334	4.11989	4.55662	4.16266	4.10739	4.42858	5.85029
Ccs	7.30083	7.31021	7.82534	7.86582	7.73429	7.78079	7.51527	7.35285	7.37141	7.33466	8.0956	7.94828	8.36575	7.61894	7.3322	6.95448	7.6712	7.66155	7.70619	7.47976	7.38776	7.82498
Ccsap	4.0627	3.80449	3.53951	3.83526	3.74925	3.50666	3.81945	3.55909	3.69408	3.45925	3.45554	3.83946	3.4566	3.96265	3.45674	3.4553	3.60575	3.76279	3.98123	4.04219	4.19131	4.12326
Ccser2	8.43849	8.57187	9.03519	8.09128	7.68546	8.34379	8.01145	8.27822	8.74101	8.77355	8.94533	8.90985	8.39439	7.97564	9.14762	8.33069	7.87779	7.60859	7.57138	7.49542	6.91378	7.17589
Cct2	10.8687	11.0437	10.8617	11.2555	11.0787	11.0038	11.203	10.9367	11.035	11.0886	10.776	10.7864	10.8636	10.91	10.9356	10.9449	11.4671	11.5414	11.1084	11.3899	10.9972	10.8301
Cct3	11.4617	11.684	11.5332	12.32	11.9721	11.8595	12.1267	11.8461	12.0624	11.9196	10.9959	10.9669	10.6535	11.5816	11.0625	11.1815	12.2164	11.7815	11.9335	11.8398	11.4992	11.8703
Cct4	12.0319	12.0043	12.0552	12.4775	12.1707	12.3715	12.2956	12.1481	11.8165	12.2851	11.6998	11.2448	11.2784	12.3005	11.9603	11.5583	12.3367	12.499	12.4668	13.0516	12.0514	12.1278
Cct5	12.0581	12.0027	11.7672	12.5897	12.3513	12.4364	12.4297	12.2114	11.9836	11.8947	11.2954	11.158	10.8704	11.7614	11.2549	11.2912	12.2796	11.8944	12.3325	11.998	11.4814	12.0766
Cct6a	11.7175	11.7841	11.6339	12.0182	11.8186	11.9334	11.9819	11.9703	11.7529	11.9485	10.8754	11.0664	10.9971	11.8449	11.8542	11.9525	12.3615	12.3158	11.9381	12.4253	11.7633	11.7803
Cct7	12.1114	12.0621	11.8693	12.4831	12.2361	12.1607	12.3673	12.0519	11.9081	12.1468	11.123	11.0108	10.8922	11.6653	11.1854	11.1046	12.2729	11.8961	12.1554	11.4769	11.5843	11.7813
Cct8	12.4529	12.5644	12.2923	13.1586	12.8317	12.9855	12.9704	12.6213	12.5247	12.7136	11.4962	11.6573	11.3116	12.9328	12.7953	12.5263	13.0856	13.1178	12.9987	13.6621	12.8861	12.5938
Ccz1	7.93342	7.8205	8.19327	7.63556	8.19663	7.82135	8.41369	8.33573	7.62396	7.68782	7.47155	8.62041	7.47632	8.16348	8.21519	8.37012	7.84057	8.37053	7.77024	8.89654	8.142	8.00729
Cd1d1	7.14734	6.78507	6.93081	6.42739	6.40117	6.89444	6.23833	7.48475	6.54164	6.86116	7.59677	6.81459	7.16947	5.94854	6.16285	6.67244	6.47012	5.70725	5.76135	6.7959	7.24859	6.15084
Cd2ap	7.93737	7.7613	8.42098	8.22807	8.37229	7.44672	8.3254	8.11744	7.67719	7.73091	9.23081	9.00883	9.54955	9.34007	9.77405	9.50645	7.72759	7.98562	8.79438	8.24764	7.68488	7.71288
Cd2bp2	8.27133	8.0051	7.94352	7.1355	7.60824	7.75894	7.10819	8.1743	8.23136	8.05205	7.55361	7.68994	7.43108	7.23105	7.81013	7.17215	8.07139	7.5404	7.49311	7.38508	7.03129	7.82448
Cd3eap	6.60281	6.24323	6.03045	6.68853	6.79869	6.77873	6.32797	6.68678	5.73667	6.46356	5.35531	6.13527	6.21973	5.82304	6.17496	6.05975	6.98806	6.21954	6.66506	6.44113	6.30355	6.29004
Cd9	9.6762	9.49611	9.28698	9.32914	8.95209	9.3666	8.73149	9.13019	9.63745	9.3879	8.75312	9.88613	9.53454	9.65368	9.76283	9.48834	9.53982	9.52063	9.99807	7.98457	9.01437	8.60212
Cd24a	10.11	10.4613	10.2997	9.42979	9.61475	9.26437	9.70271	10.4523	9.69822	10.4434	9.97027	10.5728	10.4218	10.0281	10.6634	10.7068	11.1593	11.5151	9.89531	10.8207	8.9836	8.69347
Cd34	12.6182	12.3348	12.2986	12.4467	12.3264	12.4818	12.3737	12.6026	11.5829	12.4182	13.3925	13.3866	13.2529	12.3872	12.3342	12.6461	12.579	12.5935	12.1909	9.58949	10.6823	9.16318
Cd36	6.34634	7.09914	7.16618	5.8414	6.54503	5.74457	6.03799	5.18333	5.17125	6.73495	5.87097	4.84052	3.98195	6.15297	3.98571	6.40572	3.95574	3.92764	5.42531	8.63202	7.80131	8.14628
Cd38	11.0314	11.1103	11.0856	10.6586	10.1868	11.1171	10.8166	10.4529	10.2119	11.2023	10.992	11.013	10.7738	11.5216	10.7628	11.6569	8.1938	9.29185	10.4812	7.92264	7.97459	7.01653
Cd40	9.15116	9.31706	8.96446	8.08637	7.89331	8.59684	8.09199	7.73478	8.71018	8.09699	9.83058	9.93676	9.06063	7.26697	8.42678	8.07654	3.80097	4.27964	6.89251	4.10966	4.28609	4.15183
Cd44	6.83815	5.13589	7.29433	7.27663	8.3764	8.30134	7.49152	7.28863	7.06195	8.35145	9.84258	9.69527	10.2563	10.5532	10.5464	10.1904	9.95403	10.5296	9.7887	10.5485	10.3287	9.67236
Cd46	3.81864	3.48284	4.44837	3.4812	3.48729	3.48121	3.47514	4.27179	3.84008	3.58112	3.73199	4.132	4.91051	4.1076	4.7947	5.6027	3.65875	3.50314	4.01301	3.48339	3.49132	4.36338
Cd47	9.83449	10.0031	9.85623	9.45904	9.16209	9.74844	9.28064	9.34615	10.0792	9.49401	8.76473	8.41536	8.67504	9.30586	9.22312	10.3149	10.933	10.9315	10.1338	11.0882	10.7232	10.8179
Cd55	6.84294	7.30872	5.73864	6.99654	7.01287	4.89955	6.4427	7.34318	6.52987	6.19997	7.89174	8.04361	7.44803	7.79441	8.41884	7.64389	6.13297	7.45504	6.55146	7.87962	7.17982	5.79989
Cd59a	8.2169	8.86555	8.88275	8.17484	8.91673	8.79568	8.37521	8.32956	7.66537	7.76576	8.4517	8.34918	8.29108	8.81455	7.76617	8.08635	5.64131	6.94964	8.37861	7.41962	7.051	6.49625
Cd63	8.56135	9.04585	9.51699	9.16588	8.83716	8.76678	9.00391	8.67008	9.02313	9.00128	10.7274	10.5541	10.7041	9.76125	9.76422	9.66437	9.85563	9.93181	10.0917	10.219	10.6122	10.5388
Cd68	4.61077	2.90775	2.83193	4.52579	5.21321	4.16347	3.7221	3.56296	4.46596	4.52802	2.80443	2.79541	3.92295	3.47829	2.8586	3.27496	5.05758	4.66294	4.45953	8.29001	9.79559	10.1161
Cd79b	6.01526	6.16173	6.40888	5.4292	4.56401	5.31586	5.33454	5.13002	4.48729	6.31488	6.21718	7.02216	7.1737	5.80411	5.12137	6.04202	6.37472	5.80319	6.01758	6.26279	7.39437	7.81345
Cd81	12.6497	12.4049	12.6671	12.5776	12.3306	12.8905	12.3295	12.2571	11.9151	12.1527	12.1192	11.9304	11.5746	12.0954	11.3431	11.5433	11.3106	11.0935	11.7959	10.3938	10.8202	11.0231
Cd82	4.78809	4.88306	4.09448	3.7104	3.90137	3.71041	3.70576	4.14366	3.71408	3.86311	4.10318	5.34451	4.60064	3.84253	4.08046	3.95172	4.4017	4.13747	3.7064	4.55399	4.17571	4.23514
Cd83	3.84271	5.20023	1.95323	4.34099	2.1057	3.40571	1.90021	2.03754	2.69237	4.49928	4.93073	1.91032	1.97719	1.83249	1.98401	1.90729	1.92813	1.87211	1.91746	6.35874	6.73781	8.33643
Cd93	11.3609	11.4804	11.533	10.965	11.2424	11.207	11.0354	10.6612	10.7127	10.7678	11.5096	11.9282	11.4869	11.2758	10.7259	11.0411	8.90483	8.99241	10.3984	5.37417	7.89671	6.58008
Cd99l2	7.04844	7.0977	4.61982	6.32545	6.91472	4.74896	5.85296	6.46904	6.34665	7.10638	6.6209	7.72706	6.79153	6.51117	5.49059	6.35929	5.71818	6.31364	6.62458	7.01337	5.73419	5.30174
Cd109	8.98405	8.853	8.85647	8.93275	8.8429	9.08737	8.67185	8.73574	8.95956	9.26129	8.27719	8.5855	7.6408	9.61244	8.7622	9.13782	5.84724	6.2653	8.49333	4.28041	4.43798	6.2871
Cd151	9.63741	8.91394	9.17685	8.47574	8.58191	8.25186	8.71731	9.20277	8.6768	8.97996	9.29823	9.41745	9.32182	8.78394	8.37865	7.61637	7.82228	7.51386	8.17777	6.92469	7.20152	7.12382
Cd164	11.0044	11.2494	11.4258	10.9951	11.0394	11.4196	10.9896	10.6915	10.8859	11.281	11.7809	12.0449	11.7875	11.7858	12.1611	11.8818	11.0777	11.686	11.1741	12.0989	12.0434	11.6041
Cd200	8.64943	7.88149	8.15588	7.03329	6.66523	6.12024	6.96294	7.44937	7.25706	8.41608	8.84114	9.41697	8.87125	8.47175	6.26999	8.04959	3.94021	4.07339	5.87671	4.07017	6.5885	4.76298
Cd200r1	2.93292	2.80417	2.71102	2.7753	4.22563	2.77541	3.28676	5.32271	2.85612	4.54015	2.67672	2.66541	2.73668	3.61473	6.29171	2.66221	8.81757	9.82386	8.72644	6.47877	7.25972	7.28156
Cd248	4.30427	3.94356	3.84406	3.68157	4.26839	3.8034	4.04173	3.68225	4.33891	3.92964	3.67931	4.03643	4.31677	3.7722	4.19144	4.5496	4.2632	3.69661	4.14179	4.09886	4.37429	3.68647
Cd276	8.37768	8.96618	8.80212	8.16077	8.41865	7.58409	8.15858	8.60655	8.94558	8.58008	8.62509	8.53575	8.31954	7.92909	7.9574	8.41324	7.84915	8.01584	7.97949	5.88165	5.40791	7.04955
Cd300lg	4.69142	4.3611	4.07042	3.4874	3.6839	3.4874	3.98041	4.2291	3.48976	4.01714	3.48492	3.48466	3.48638	3.80158	3.9945	3.84235	3.4851	3.65132	4.10085	3.86286	3.95134	3.49274
Cd302	8.12834	7.98567	8.15805	7.70384	7.36893	6.89223	7.97448	7.35262	7.62473	7.59266	7.60925	7.99308	7.03598	7.63525	7.47358	7.76724	6.54022	6.97046	7.7066	8.31893	8.29107	8.01469
Cd320	7.89782	8.03259	8.01729	8.16972	8.06724	7.94016	7.82802	7.75419	7.92838	7.92041	7.91613	7.69432	8.05307	7.98812	7.94848	8.03505	8.34344	8.24891	8.40582	7.62263	7.64819	7.64315
Cda	5.50471	5.10519	5.29424	5.43965	5.14147	5.48008	5.15543	4.93623	5.48206	5.08184	4.83169	4.85721	5.08017	4.66717	4.43445	4.72357	4.40972	4.36742	4.70432	4.24844	4.45852	4.25745
Cdadc1	7.36564	7.21815	7.59445	7.95961	6.9986	7.78972	7.79547	7.39974	7.41613	7.33628	7.6652	7.9316	7.94453	7.63203	7.91436	7.67042	7.64157	7.49282	7.91562	8.06683	7.34524	7.40658
Cdan1	6.08308	5.96355	6.61615	6.10567	6.59797	6.28076	6.11818	6.95964	6.75536	6.18561	6.61416	6.96433	6.39803	6.58196	6.1341	6.40286	6.02907	6.41008	6.56287	6.64605	6.32002	6.14569
Cdc5l	9.17136	9.46753	9.38711	9.56698	8.89702	9.83535	9.61796	9.21115	9.07628	9.48739	9.50896	8.50025	9.22321	9.54328	9.45058	9.46095	9.24142	9.56694	9.23715	9.66854	9.31788	9.56422
Cdc6	7.89487	8.56274	8.7006	8.59781	9.03788	8.94773	9.43499	9.09108	8.87266	9.08753	6.99789	8.06416	6.00855	8.35122	7.47493	7.77003	8.88547	9.22554	8.62736	8.55329	8.1455	8.76882
Cdc7	8.77984	8.14998	9.03749	8.51488	8.72222	8.55017	8.73659	8.03573	7.9816	9.25511	7.9827	8.45309	6.76427	8.62094	8.70695	8.38022	8.98904	8.63812	8.9273	8.4293	8.50671	8.61363
Cdc14a	5.4955	6.64439	6.16339	6.65518	6.4906	5.86763	6.10001	5.54396	7.16649	6.34888	5.91129	7.23871	5.50537	6.45955	6.57611	6.83108	6.07224	5.59728	6.1149	5.63994	6.4516	6.04254
Cdc14b	5.45554	5.8826	6.04093	6.34353	6.00736	6.93458	6.21727	6.24011	5.23993	6.44113	5.29924	5.71855	4.8816	5.30276	6.21994	6.85425	5.23395	6.23333	6.14473	6.47094	5.9565	5.74164
Cdc16	10.9475	11.108	10.6818	11.1641	10.9285	11.0544	11.0773	11.0274	10.6211	10.4145	10.2706	10.6456	10.3546	10.9124	10.4807	10.4932	10.5558	10.2833	10.9694	10.5001	10.175	9.77055
Cdc20	10.8773	10.0999	9.56295	11.3943	10.9584	10.5855	10.8231	11.0217	10.6236	9.55554	7.71708	8.1466	6.36913	11.2167	8.49388	9.33983	10.8261	9.69253	11.2506	10.1965	10.3155	10.9042
Cdc23	9.49572	9.58656	9.36772	9.9451	8.96322	10.0856	9.64927	9.1749	9.24469	9.27164	9.76227	9.03679	8.44901	9.44535	9.3837	8.7378	9.53101	9.53279	9.65338	9.11818	8.82409	9.03729
Cdc25a	7.56543	7.10713	7.2504	8.37958	8.23237	8.4768	8.30295	7.74312	7.82463	7.57286	7.48677	7.54973	7.26089	7.60626	6.61364	7.00069	7.2615	6.90478	7.71818	6.93091	6.74988	7.5535
Cdc25b	5.20809	4.8899	4.83664	5.06906	5.70923	4.30506	5.68635	5.40654	6.12274	4.92779	4.29771	4.29694	4.30203	5.6121	4.71143	4.83779	4.82766	4.87176	5.51817	5.45717	5.23037	5.89429
Cdc25c	7.62346	7.17864	6.84262	7.38414	6.63227	7.90605	6.51589	7.43833	7.35395	7.16179	4.7169	5.72495	5.91044	7.65792	6.54681	6.18383	7.24239	6.71634	7.35979	6.69276	7.41976	7.10835
Cdc26	8.40989	8.47086	8.50203	9.17945	8.90581	9.24958	8.86637	8.31235	8.65991	8.45407	8.01562	8.02903	8.25197	8.67366	8.18131	8.54564	8.69789	8.65198	9.0391	8.54705	8.27264	8.50997
Cdc27	8.87587	9.29567	9.19593	9.10706	8.83674	9.35797	9.29152	9.27223	7.84922	9.00977	8.62419	9.01778	9.09896	10.037	9.8982	9.29524	8.79938	9.40052	9.33021	10.0001	9.66447	8.71578
Cdc34	7.39864	7.45422	7.10718	7.50634	7.72344	7.25104	7.02725	7.84468	7.65278	7.33706	7.53093	7.29455	6.86186	6.66661	7.26185	7.27799	7.79166	7.69699	7.48722	7.2257	7.34068	7.82768
Cdc37	10.6723	10.4483	10.3058	10.3459	10.3279	9.86393	10.4901	10.5442	10.3649	10.2315	10.207	9.69919	10.048	9.58063	9.7094	9.99207	10.481	10.1632	10.0799	9.4468	9.8485	10.4614
Cdc37l1	7.06361	7.30988	7.71275	7.12544	7.128	8.0388	7.09517	7.13004	6.6754	7.29014	7.46199	7.93165	8.40157	7.62391	7.63874	6.13744	7.46277	7.42748	7.54501	7.71447	7.64442	7.35417
Cdc40	7.99568	7.86101	7.63862	8.20263	8.21768	7.56853	7.97499	7.17367	7.35451	7.26271	7.655	8.08883	8.39367	8.54771	8.06346	7.62345	8.45706	8.69142	8.32271	8.08826	8.75137	8.36793
Cdc42	12.557	12.4172	12.4738	12.4667	12.3052	12.4437	12.489	12.4723	12.0464	12.3731	12.3619	12.3274	12.3724	12.6034	12.5315	12.1975	12.2944	12.5188	12.3793	12.7127	12.9283	12.3986
Cdc42bpa	8.14219	7.71526	6.98647	7.51781	8.33777	7.9814	8.0384	8.38344	7.66846	7.85362	8.89864	8.38816	8.35678	8.25582	8.29223	7.84304	6.70692	7.08817	7.51318	7.14779	6.12827	6.8211
Cdc42bpb	8.17614	7.98565	7.99072	7.30645	7.24759	6.76422	7.34601	8.1094	8.62666	7.74259	7.83001	8.29129	7.54627	7.63935	7.49963	7.51882	5.89043	5.83466	6.17054	6.18467	6.03694	6.23269
Cdc42ep1	8.54323	9.1314	9.48296	8.62186	8.60944	8.05119	8.21512	8.42305	8.81607	9.25746	8.84004	9.01301	9.02541	8.37907	8.11083	8.49543	5.43482	5.95151	7.97591	4.24402	5.24071	4.40594
Cdc42ep2	7.53654	6.94424	6.97322	5.51908	5.98529	5.2952	6.25935	5.97009	5.91046	6.34207	6.2306	6.26532	5.63283	5.64705	4.98704	4.1345	4.13913	4.12705	4.52501	4.16918	4.20254	4.20501
Cdc42ep3	7.57853	6.55685	6.42421	5.66192	6.31105	6.45468	6.49539	5.15888	6.01697	6.23237	7.64803	8.00229	7.77132	6.82349	5.93644	6.19728	5.81974	5.09492	5.78632	6.88004	5.68209	6.83213
Cdc42ep4	6.22085	6.01277	6.16719	6.00265	6.08419	5.74929	5.66853	5.43479	5.54822	5.81065	4.90244	5.4703	5.88564	5.04919	5.44115	5.11296	4.94704	5.50719	4.9752	4.95658	4.88863	5.33941
Cdc42ep5	6.03891	5.87993	6.21237	5.76559	6.02351	5.95309	6.05438	5.70531	6.26302	5.8987	6.00829	5.30288	5.50685	5.76691	4.95567	5.79563	5.17747	4.79874	5.55614	5.12638	5.09532	5.10197
Cdc42se1	9.52869	9.55005	9.36097	9.47051	9.38946	8.96127	9.01709	9.35601	9.03369	9.32384	9.16535	9.27791	8.40563	9.1921	9.08697	9.09256	9.17875	8.7024	8.96681	8.61051	9.09093	9.19686
Cdc42se2	9.44458	9.13313	8.90769	9.45142	9.21032	9.59316	8.96032	9.11863	9.33297	8.4791	9.32075	8.26561	8.53514	9.12363	9.06269	8.75586	9.04165	8.9419	8.8374	9.12116	9.57862	9.37187
Cdc45	9.11437	8.99157	8.91808	8.86628	8.93753	9.10398	8.9369	9.39339	8.53564	8.43122	8.0119	7.69306	7.20698	8.48996	8.37351	8.35755	9.37795	8.52885	8.61063	8.87517	8.589	9.26962
Cdc73	7.01234	6.85561	7.49036	7.70411	7.3533	7.43699	7.3758	5.66215	6.76056	6.90633	6.59644	8.07146	8.14641	7.80531	7.12875	8.27955	7.32791	7.44604	7.39787	6.98263	7.26837	6.64593
Cdc123	10.0963	9.90784	9.48845	10.1319	10.158	10.5941	9.87501	9.83542	9.63921	10.302	9.4404	9.82191	9.14252	10.6464	10.5259	10.6833	10.3908	10.7089	10.1285	10.5858	10.243	10.3968
Cdca2	8.9295	8.6845	8.66193	8.64337	8.32503	8.27171	8.61819	7.81775	8.69708	8.69596	6.79758	6.06016	7.57098	8.52396	8.32929	7.23714	8.4037	7.43537	8.75189	8.34334	8.72561	8.51656
Cdca3	8.85204	8.46039	7.72723	8.94613	8.53828	8.24461	8.73637	8.92463	8.92411	8.60396	6.01131	6.87221	6.70508	8.43935	8.40979	7.53313	9.10523	8.08539	8.99415	8.6956	8.99306	8.79739
Cdca4	10.1807	9.64246	9.51628	9.46021	9.58511	9.11771	9.37371	9.46219	8.81453	9.43712	8.82939	7.92709	8.68129	8.97969	9.2297	8.98319	9.4274	8.95491	9.03157	9.1419	9.48926	9.6617
Cdca5	8.55725	7.73528	7.65855	8.75767	8.21398	8.82207	8.6256	7.83931	8.49407	8.24024	5.92786	5.05537	6.68057	8.03738	8.08933	6.45164	8.66773	7.9649	8.8557	8.53453	8.85884	8.37678
Cdca7	9.26487	9.7094	9.49678	9.57436	9.38849	8.69237	9.25417	9.71875	9.49323	8.73249	8.87745	9.08753	7.97395	9.60965	9.41544	9.27859	9.80917	9.87767	9.59436	9.60613	8.88446	9.41745
Cdca7l	7.33624	7.62795	7.12525	7.35783	7.32945	6.9982	7.09997	7.3912	7.70706	7.6326	8.09535	6.83127	7.98112	7.72354	8.09841	7.58142	8.25531	8.48523	7.72585	8.05343	7.47904	7.60397
Cdca8	10.2964	9.77746	9.03554	10.5811	10.0918	10.319	10.305	10.049	10.4027	9.33089	6.12793	8.72564	8.18041	10.0183	9.41689	8.75433	10.0387	9.43308	10.3413	10.0528	10.1914	10.2302
Cdh2	6.76805	7.11528	6.84447	7.54815	7.29736	7.29199	6.81266	6.64113	5.59121	6.69313	6.36098	6.37789	5.82375	6.11144	4.75069	6.22211	4.36245	4.34619	5.65784	4.40233	5.41582	4.44888
Cdh5	10.3664	10.8444	11.0896	9.94696	10.3359	9.98961	10.4983	10.6274	11.1719	11.5503	11.9839	12.4155	12.4038	11.2434	12.0729	12.3032	8.77035	10.1172	10.0875	4.2309	4.47433	4.49072
Cdh13	4.34038	5.89752	5.14922	4.29278	3.91928	4.98272	4.64188	5.02119	5.29141	4.99941	6.0391	6.24759	5.36272	3.89033	3.90456	4.45926	3.89884	3.92854	4.24569	3.91192	4.65142	3.92793
Cdip1	8.29662	8.76833	7.97992	7.5642	8.15801	7.48946	7.84668	8.12067	8.01527	8.10249	8.37492	8.00545	8.15057	7.08229	8.03374	7.84901	7.42675	7.29073	7.42505	7.24155	7.46308	7.36077
Cdipt	9.81624	9.74535	9.78735	9.48683	9.35862	9.37188	9.13139	9.59595	8.90904	9.09648	9.65673	9.57739	9.48138	8.84786	9.08526	8.76948	8.9879	9.24054	8.89634	8.47134	8.56626	8.72615
Cdk1	11.5923	11.0467	10.5791	11.4189	11.1499	11.3551	11.1934	11.1279	10.351	10.7659	9.83976	9.75104	9.55764	11.3156	10.7619	10.0765	10.8214	10.213	11.2571	11.0401	11.0624	11.3066
Cdk2	9.312	9.1011	9.24085	9.57612	9.39465	9.14238	9.37589	9.33948	8.36338	9.46641	8.95092	8.07421	8.90225	8.85437	8.80462	8.24702	9.78226	9.53077	9.36042	8.94967	8.79934	9.32856
Cdk2ap1	6.27067	5.93946	6.11212	6.58161	6.69374	6.24348	6.34338	6.20362	6.90317	6.23028	6.32752	6.17872	5.96972	6.05371	6.0124	5.9994	6.04312	5.69102	5.94373	6.08602	5.85588	6.00737
Cdk2ap2	6.99152	7.28336	6.34276	7.78215	7.89213	7.98528	7.51715	7.27131	7.56497	7.26468	7.58231	7.69189	7.86415	7.57702	7.29659	7.48928	7.53341	7.31212	7.96816	8.07941	8.23278	8.86052
Cdk4	12.2116	12.0906	11.9933	12.3037	12.0457	12.0652	12.2615	12.16	11.936	12.0496	11.7784	11.6317	11.663	11.9928	11.5658	11.4736	12.1782	11.9348	12.1827	11.5168	11.5159	11.8011
Cdk5	7.10491	7.42301	6.47223	6.77038	7.08826	7.45607	6.53974	7.25278	7.36987	6.79927	6.74829	6.69991	6.59892	6.66052	6.43501	7.10637	7.1407	6.62616	6.86112	6.38562	6.96223	7.04183
Cdk5rap1	6.703	7.45244	7.65857	7.42151	7.32133	7.44228	7.09961	7.42592	7.07543	7.44698	6.8137	6.37609	7.12829	7.34517	7.71634	7.72997	7.91007	7.40761	7.37641	7.28472	7.10385	7.55838
Cdk5rap2	7.62671	6.40002	6.80967	6.94063	7.02965	5.85035	6.71103	7.04724	7.42334	7.09509	6.4814	6.97129	5.25298	6.75867	6.21766	5.9988	6.31028	5.86697	6.91865	6.04181	6.57723	6.50368
Cdk5rap3	7.80059	7.83934	7.64319	7.37117	7.47084	7.84147	7.81839	7.83842	7.28794	7.86913	7.83892	5.55461	6.57071	7.68131	6.98686	7.74303	7.98905	7.63244	7.49177	7.72305	7.56979	7.88743
Cdk6	7.14414	7.52147	7.86808	8.30624	7.77785	8.4243	8.15591	8.07784	7.7016	7.39372	7.7104	8.01575	7.51856	7.30068	7.66239	8.153	8.93676	8.04664	8.49982	9.74038	10.0773	9.62055
Cdk7	9.2073	9.13703	9.01876	9.5906	9.39529	9.72665	9.2632	9.37285	8.23769	9.16889	8.89469	9.1665	9.04073	9.83424	9.06291	9.38049	9.15519	9.59563	9.54361	10.0794	9.71835	9.21646
Cdk8	6.59834	5.84645	6.90406	6.76235	5.96464	6.97932	7.14869	6.58999	6.2346	6.45465	6.32746	7.59411	6.87837	6.83335	6.4488	6.963	6.38365	6.45214	6.98133	7.25663	6.40784	6.12055
Cdk9	6.86618	7.609	6.99626	7.13107	7.46711	7.63824	7.49781	7.68405	7.87531	7.32246	7.34343	7.56756	7.86965	7.14804	7.21633	7.56005	7.59693	7.07983	7.53657	7.23254	7.55108	7.66774
Cdk10	6.406	5.93911	6.77121	6.21917	5.9393	5.95756	6.35368	7.18767	6.99144	6.75915	6.55435	6.55701	6.58242	5.98462	6.00528	6.71096	6.83435	6.36778	6.21297	6.36778	6.43636	7.02165
Cdk11b	8.43551	8.21119	8.26112	8.24722	8.12903	8.1814	8.55477	8.62618	8.61122	7.90076	8.76259	8.14465	8.05043	7.97861	8.36406	8.05105	7.97425	7.9565	7.79931	7.90066	7.7815	7.9396
Cdk12	7.91131	7.93175	7.81162	7.98958	7.47989	8.3823	7.5442	6.71195	7.33123	7.3477	7.54911	8.44011	8.37237	7.55111	8.18489	7.28498	8.05127	8.18206	8.12091	8.43708	7.9864	7.94853
Cdk13	6.58572	5.72847	6.57393	6.69982	6.20459	5.05131	5.74955	5.94889	6.76245	5.84917	6.88571	7.03367	7.64759	6.24507	6.2486	6.21156	6.01025	5.57444	6.00125	6.48879	6.09601	6.1884
Cdk14	5.86683	5.82434	5.91751	6.81844	6.10791	6.18253	6.92649	4.90788	5.8661	6.06616	6.65199	7.93688	7.6375	8.42283	7.27601	7.87925	6.40528	6.89388	6.56368	7.66177	7.39658	6.16694
Cdk16	7.8202	8.34086	8.90518	7.49251	8.24866	7.88453	7.83975	7.87002	8.35013	8.96986	8.15149	8.22261	7.69044	7.17149	7.90552	8.41528	8.22228	8.28484	7.43728	7.06028	7.22591	7.64987
Cdk17	8.48189	8.82769	8.97646	8.79552	8.48233	8.58586	8.87305	8.94297	8.00783	8.65215	9.28212	8.9992	9.35197	9.24147	9.5741	9.55483	8.09619	9.19676	8.83819	8.35577	7.8925	7.58587
Cdk18	4.96483	4.35675	4.01173	4.79723	4.01816	4.7748	4.87539	4.53312	4.01725	4.14528	4.01061	4.59875	4.75209	4.65138	4.48316	4.53994	4.77908	4.78241	4.43845	4.13118	4.71172	4.40439
Cdk19	7.14428	7.04854	7.313	5.35306	6.34787	5.07764	6.22712	6.09105	6.0974	6.32314	6.14427	8.61924	8.18215	7.9766	7.48115	7.66107	5.96874	8.09381	6.54916	7.00329	6.8875	7.49617
Cdk20	4.43243	4.42147	4.28928	4.38245	3.95848	3.95503	4.39416	4.52576	3.95773	4.04966	4.6076	4.1533	4.80734	4.58237	4.82527	4.46917	4.22646	4.26092	4.67714	4.77445	4.24454	4.4627
Cdkal1	7.68908	6.31866	6.95996	7.5776	7.33096	7.12736	6.95279	7.07786	7.35423	7.49701	7.15328	7.62955	7.13381	7.299	7.77986	7.96925	6.98011	6.93971	7.28322	6.71434	6.93499	7.16587
Cdkl1	5.47275	5.11698	5.4778	5.91548	5.65026	5.77761	5.73662	5.47367	4.32005	4.91577	3.85768	3.85667	3.90833	4.23271	4.59346	3.85638	3.85837	3.85319	4.3743	3.87149	3.8864	3.88752
Cdkl3	4.09189	4.17845	3.71627	4.08656	3.71922	3.71732	4.2157	4.36144	4.22088	3.97002	4.42024	4.0256	3.71668	4.08251	4.49735	3.80901	3.86021	3.84128	4.12245	3.9457	4.00793	3.72069
Cdkl5	4.19078	4.3643	3.67049	3.73076	4.1658	4.3732	4.56943	4.59183	3.89368	3.67562	4.38651	3.79901	4.47846	4.86443	4.24751	3.87336	3.8049	3.70985	3.75985	3.67379	3.93074	3.72097
Cdkn1a	5.36245	4.88924	5.45409	5.43508	6.53653	5.52719	5.31227	5.29651	4.82636	4.96596	4.96647	5.83286	4.95525	4.83201	6.16351	5.11137	4.70737	4.62895	5.77597	4.73908	5.75607	5.65058
Cdkn1b	6.10244	6.21192	6.68011	6.49536	6.85923	7.20715	6.52766	6.77417	6.64838	7.43925	6.19164	6.26696	6.60194	8.00355	8.21371	7.79471	6.76554	6.93387	7.05956	7.03455	6.69366	5.97814
Cdkn1c	9.12676	9.22208	9.29386	8.54342	9.63641	9.51885	9.48516	8.46965	9.78025	9.69781	9.95536	9.79215	9.48184	10.2386	10.2109	10.8846	8.99371	9.5593	9.84597	7.1767	5.55455	4.52699
Cdkn2aip	7.29932	7.31469	7.34907	7.09915	7.24173	7.09936	7.00397	7.76066	7.72938	8.328	6.52311	7.14515	7.42109	7.27181	7.78887	7.6075	7.34581	7.84029	7.27315	6.89763	7.16981	7.44324
Cdkn2aipnl	8.70575	8.76552	8.65082	9.31438	9.18076	9.22438	9.07465	8.71259	8.94734	8.68284	7.75631	7.38126	8.11319	8.50789	9.00473	8.30344	9.32423	8.73972	9.10945	9.05318	8.69392	8.99694
Cdkn2d	7.19943	6.68528	6.73046	7.12001	6.62429	6.76381	6.92248	6.91711	7.39065	7.30165	6.71575	6.83633	7.44295	7.49596	7.72158	6.95533	7.14023	7.2227	7.3545	7.01107	7.40217	7.57973
Cdkn3	7.26581	5.90346	7.1362	7.67569	7.2208	7.17461	7.57814	8.10523	7.37677	7.29382	4.46722	6.38508	5.35739	7.98192	7.16889	7.3146	7.09175	7.0573	7.84946	8.87059	8.58343	8.41348
Cdon	3.39247	3.99451	3.47925	3.38818	3.95132	3.38818	3.68525	3.4184	3.39023	4.02265	4.37303	3.66145	4.21959	3.91572	3.53193	4.13759	3.38618	3.89661	3.5476	3.64923	3.39256	3.39282
Cdpf1	7.17202	7.26136	6.73758	7.34604	7.12904	6.96911	6.97356	7.32972	7.11638	6.86233	6.60435	6.22545	6.75094	6.58256	6.74996	6.10659	7.09993	6.74501	6.83752	6.96098	7.52856	7.39419
Cdr2	5.85592	5.49617	6.17837	6.40721	6.2509	6.81578	6.29777	5.67549	6.7218	6.3771	4.72733	6.43921	5.61948	6.4822	6.81389	5.20192	5.54994	5.7912	6.45933	6.2254	5.72321	6.07002
Cdr2l	7.67848	8.06364	8.11951	7.71868	7.8595	8.15055	7.44953	8.07723	8.4468	7.7211	7.8679	6.89474	6.86906	7.11721	7.38272	7.79118	5.51551	5.99939	6.91879	4.85368	5.7483	4.62499
Cds2	8.15758	8.2866	8.34574	8.05481	7.91271	7.12882	7.56764	8.05909	8.22337	8.0066	8.13703	7.78597	8.50873	7.88388	7.33303	7.31381	6.55757	6.40114	7.33427	6.74459	6.59942	7.25961
Cdt1	8.26813	8.69848	8.29179	8.093	8.47619	8.68157	8.21959	8.83394	8.816	8.23144	8.18759	8.26722	7.64914	7.73566	8.52096	8.08124	9.00576	9.05859	8.15027	8.39322	8.18013	8.90007
Cdv3	8.09842	8.68434	8.03397	9.42963	9.13204	9.99157	9.4131	8.56057	9.46139	9.49738	8.45677	8.58581	7.95691	8.82056	9.23085	9.30951	9.04073	8.96308	9.15165	8.83041	8.91568	8.57403
Cdyl	6.81701	6.29414	6.05342	6.6093	5.71536	6.88507	7.10698	7.2848	5.91337	6.58796	7.49327	7.13506	7.38145	7.58433	7.6415	7.62659	7.01748	6.72306	6.80584	7.06521	6.64631	6.11278
Cdyl2	6.43137	6.09341	5.55041	6.07845	6.41183	5.24932	5.83833	6.28328	5.56331	6.33338	6.47768	6.30609	6.86782	6.26216	5.91156	6.82853	6.18441	5.91889	6.07248	4.9308	6.18424	6.10098
Ceacam1	7.02087	7.87555	7.23582	5.75833	6.77441	6.30087	5.89893	6.67581	5.93593	6.85338	7.73953	7.0985	6.89218	6.85454	6.71855	6.27133	6.02417	6.35193	6.40415	6.59025	6.29887	6.95768
Cebpd	6.09481	6.58788	6.95535	5.89326	6.27451	6.12529	6.07431	5.70947	6.09769	6.29572	5.59913	5.70253	4.93066	6.06027	5.03481	6.08743	6.10089	6.51584	6.00172	6.75459	7.07724	7.05224
Cebpg	6.91861	7.55684	7.09931	7.41951	7.37616	7.23156	7.46415	7.14483	7.82859	7.17667	6.65126	6.28698	6.0782	7.17497	8.02649	7.69714	7.68761	7.25126	7.51044	6.88159	7.49321	7.13092
Cebpz	8.25265	8.05043	8.49727	8.60107	7.7291	8.40045	8.36578	7.80063	8.81857	8.44785	8.42683	7.90598	7.74996	8.05815	8.34277	8.9362	8.73926	9.04197	8.75939	8.92959	8.38168	8.49081
Cebpzos	6.58184	6.65633	6.73447	6.8911	6.86154	7.17011	6.88457	6.64202	7.00985	6.8072	7.01943	7.63843	7.30719	7.27459	7.28477	7.17728	6.84847	7.17146	7.20086	7.17587	7.65932	7.27818
Cecr2	5.84334	6.5115	6.07402	6.9759	5.83814	6.24162	6.32826	5.85704	4.74804	6.10521	4.92592	6.54141	6.67252	6.69072	7.02575	6.13595	5.52268	6.22668	6.7548	6.81349	6.01186	5.55544
Cecr5	5.9395	5.31875	5.11585	5.76261	5.30605	5.74847	6.1776	6.45573	6.41633	6.24921	6.72946	6.32039	6.35944	5.92463	6.69851	6.23828	6.24427	6.42055	6.2444	5.5077	5.73971	6.75971
Cela1	4.22152	3.98439	3.58128	3.58614	3.84683	4.43997	3.57741	3.5883	3.59298	4.38726	3.57888	3.57812	3.58316	3.74157	4.12268	3.61472	5.63606	5.29742	4.96908	4.50631	5.70564	4.95177
Celf1	8.60155	8.55129	8.49093	8.99098	8.64151	9.16715	8.90332	8.69683	8.66621	8.57613	8.39682	8.84187	8.83663	9.00029	8.87371	9.02625	9.07641	8.64742	8.87934	8.91443	9.0388	8.97445
Celf2	6.29699	5.6635	6.96709	6.88587	6.92085	7.06308	6.25467	4.42904	6.56601	4.0575	6.5463	7.67957	7.68211	7.46767	7.88705	7.85996	9.60613	9.53593	9.27984	9.83489	10.0268	9.26246
Cenpa	10.4762	9.7687	9.85337	10.3784	10.2651	10.0838	10.2847	10.5621	10.3641	9.47679	6.88574	8.70453	8.6179	10.4565	9.04583	9.3047	10.1549	9.64542	10.5938	10.0814	10.2779	10.5291
Cenpb	4.90014	5.06657	5.33414	5.16674	5.62025	5.4587	4.95227	5.08009	5.16795	4.9592	5.64746	5.64175	5.54341	5.30286	4.97812	5.02149	5.29928	4.66999	5.20831	4.5953	4.95215	5.24787
Cenpc1	8.58229	8.00443	8.54674	8.46672	8.059	8.08158	7.90962	7.50515	7.15755	8.57654	7.90605	7.09146	8.15638	9.36295	8.6816	8.48365	7.92534	8.11851	8.59863	8.43404	8.49846	7.27123
Cenpe	10.2357	10.115	9.5227	10.4535	10.2596	9.88845	10.1748	9.96959	10.2239	10.6486	7.37878	8.08509	9.60677	11.4351	10.0283	10.4279	9.1635	8.72957	10.2448	10.8246	10.5928	9.80357
Cenpf	9.65314	8.99021	8.66647	9.59099	9.33572	9.34891	9.33494	9.08245	9.2322	7.99012	8.54945	7.7004	9.23637	10.2363	9.00473	8.01291	8.25166	7.42493	9.54403	8.89016	9.23876	9.21508
Cenph	8.16488	7.78321	7.78902	7.79934	8.08801	8.38136	8.35915	8.37358	8.35302	8.61684	6.87155	7.77933	5.84031	8.82237	8.426	8.19374	8.62654	8.94905	8.79837	9.82782	8.81805	8.58462
Cenpi	8.18551	7.81213	7.95175	7.56688	8.16123	8.49467	8.31291	8.46409	7.32444	8.56877	7.16207	7.81477	6.60333	8.62792	7.92596	7.89198	8.67906	8.12495	8.14312	9.00592	8.49886	7.19536
Cenpj	7.6062	7.29088	7.05592	7.67298	6.87774	6.35379	7.74756	6.98907	7.94084	6.6434	5.98282	6.92811	6.0677	8.06754	7.64603	6.7079	6.86367	7.20672	7.0558	6.74463	7.23051	6.75636
Cenpk	7.62287	7.92376	8.19773	8.54001	8.17188	8.97446	8.62445	8.2383	8.87965	9.06951	8.01984	8.64769	8.59894	9.7801	9.68095	7.87162	9.49014	9.95355	9.07071	10.087	9.23541	8.84631
Cenpl	8.00752	7.56851	7.34429	7.91266	7.52678	7.28293	7.34883	7.8479	7.39656	7.6446	6.11604	6.38907	6.09915	8.01225	7.75017	4.82053	7.39224	7.08678	7.74928	8.36671	8.0373	7.96136
Cenpm	6.58413	6.59143	5.81108	6.49879	6.20107	6.73024	6.64067	6.55525	6.45068	6.04872	5.50988	6.02821	5.47778	6.38485	6.29601	6.22323	7.25491	6.7628	6.72405	7.00565	6.62077	6.81517
Cenpn	8.04961	7.20379	7.76005	7.51548	7.87711	7.66572	7.44538	7.5909	6.16473	7.56612	6.12751	7.11999	6.76998	7.62028	7.49013	7.81279	7.65638	7.5564	8.04129	8.13888	7.86773	7.63175
Cenpo	6.1678	6.41951	6.29591	6.60436	6.48058	6.47259	6.5386	5.96259	6.60452	6.4366	6.14643	4.75975	5.15501	5.98291	6.03053	6.74998	6.9198	6.52994	6.00313	7.19222	7.06231	7.36607
Cenpp	7.66894	6.6782	6.4582	7.79834	7.11455	6.97992	7.12002	7.58162	7.44763	7.91151	6.18042	6.41072	7.44532	7.8106	8.20667	7.97119	8.32076	8.67529	7.97863	9.19068	8.34268	7.99159
Cenpq	9.2402	8.70875	8.52532	9.09035	9.2926	9.69863	8.90328	8.72711	8.72486	9.48066	8.1133	8.12273	7.80113	9.67316	9.56835	9.14711	9.00301	9.38773	9.20179	10.0563	9.75388	8.45366
Cenpt	9.21037	8.85525	9.09609	9.29159	9.2838	9.28829	9.34312	9.013	9.32125	9.24521	9.73727	9.72985	9.71131	9.34226	8.8723	9.13477	9.01809	8.80845	9.12419	8.3813	8.37405	8.55375
Cenpu	5.99817	5.67446	5.72869	5.89999	5.81671	6.35307	6.15913	6.0452	5.47533	5.32392	6.17238	5.89427	5.14335	5.73391	5.7156	5.38379	6.59686	6.12505	5.93146	6.53909	6.31188	6.38534
Cenpw	8.6957	8.51191	8.60393	9.08308	8.92219	8.90891	9.21155	8.72718	8.65784	8.32813	7.40899	7.95761	7.76712	9.19165	8.11554	8.52037	9.18995	8.96395	9.18114	9.87037	9.0971	9.10136
Cep19	7.00849	7.09103	7.0154	6.97963	7.55867	6.97302	6.98766	7.10594	7.30925	7.21125	7.07954	6.71851	6.90207	6.80004	6.70924	7.46509	6.53674	7.44272	6.77356	5.81907	7.13838	7.17131
Cep41	5.56289	6.36083	5.97917	5.76806	5.51683	5.99387	6.75794	5.39213	5.10621	4.78162	6.29199	5.31255	5.79173	5.93313	6.16862	6.37006	5.8129	6.02459	5.77675	6.29695	6.05774	5.77129
Cep44	7.21406	7.06059	7.13412	7.46967	7.18745	7.34845	7.11711	7.26929	7.54955	7.43597	6.15494	7.97353	6.81808	8.15106	8.1274	5.88684	7.30354	7.65205	7.51404	8.06969	8.13273	7.77739
Cep55	8.66491	7.85459	8.13702	8.82038	8.0309	8.29252	8.015	8.12199	8.68022	8.28302	4.41229	6.69406	7.20006	9.34383	8.95937	8.58482	8.4085	8.69314	8.60007	8.88511	8.64411	8.07512
Cep57	8.99813	9.51948	8.67961	8.63339	8.88371	9.3581	9.2421	8.69764	9.0082	9.95705	9.13818	9.06283	9.47664	10.0811	9.9483	9.90068	9.54428	9.90914	9.4548	10.0788	9.58346	9.50294
Cep57l1	7.85813	7.38616	7.66559	7.66901	7.45658	8.04557	7.01655	7.40227	7.73947	8.45365	7.57438	7.52019	8.10872	8.09706	7.8176	7.73706	8.05809	8.15201	8.38566	8.23955	8.53935	8.15243
Cep63	6.67794	6.95863	6.3495	6.98407	6.70671	6.03887	7.34343	6.77249	7.28674	6.65257	5.94674	6.67749	5.86719	7.00178	6.85916	7.22493	6.9882	6.83922	7.25982	6.6763	6.98489	6.89007
Cep68	8.28421	8.34996	7.60317	7.347	7.63156	7.60763	7.56869	8.65656	8.46957	8.44889	8.34638	7.7742	8.53708	8.00023	8.34813	8.02707	8.09212	8.03385	7.9077	7.73558	7.80535	7.44662
Cep70	6.93075	6.13791	6.79977	6.61713	5.78248	6.84586	7.16261	6.77041	5.8561	6.24842	6.00867	5.28419	7.03423	7.4474	7.90886	6.17697	7.96501	8.52186	7.47594	8.58298	8.00378	7.22208
Cep72	6.29648	6.61437	6.16614	6.57701	6.87498	5.90107	6.21854	6.42325	7.43942	7.3417	5.90738	6.3735	6.1333	6.43837	6.94524	7.21309	6.68969	6.46639	6.33353	5.97311	6.30132	6.34429
Cep76	6.57861	6.35534	7.10612	6.38699	5.79761	5.61501	6.05862	6.19183	6.387	5.64908	5.97699	6.44313	4.92395	7.0054	7.17805	5.71218	5.49235	7.33826	6.21521	7.48999	6.54108	6.17269
Cep78	5.90754	6.74861	6.50749	6.68545	6.73053	6.74659	6.79145	6.79807	5.89023	7.36614	4.8423	6.88088	6.70011	6.27364	7.17628	6.86409	7.45787	6.66469	6.94103	7.09059	6.83097	6.82679
Cep83	6.84604	6.52434	6.88938	6.84682	7.32611	7.06313	6.76593	6.74688	6.71379	6.94228	6.72675	7.76866	7.0411	7.21425	7.43429	6.7882	7.24782	7.58831	6.97238	7.79647	8.08841	7.30611
Cep83os	4.70432	4.30836	4.17053	4.37465	4.19069	3.86659	3.85953	3.86834	3.87214	3.8727	3.86072	5.60008	5.49382	5.32731	4.6228	4.39695	4.96883	5.17794	3.89138	4.60612	4.1535	4.93802
Cep85	7.33525	6.85099	6.85201	6.20553	6.36185	5.90654	6.79523	6.31534	6.36243	6.71311	6.28463	5.63153	6.63088	5.75847	5.81562	6.29856	6.61222	6.91092	6.31794	6.79093	6.70136	6.69663
Cep85l	6.0595	5.68456	6.69969	5.19289	5.9474	5.26261	5.59415	6.37516	5.72138	5.54669	6.47956	6.18206	6.79587	6.0108	6.58236	5.51564	5.63411	5.85998	5.78617	5.9899	6.50411	6.27808
Cep89	6.84697	6.19217	5.58021	6.38496	6.58454	5.57277	6.33212	7.2022	7.13712	6.28081	6.28375	6.00139	5.8096	6.12066	5.98343	5.97714	6.73178	5.7867	6.09538	5.39681	5.80034	6.68978
Cep95	6.01209	5.31676	5.85782	5.80142	5.37003	6.04381	5.43676	5.52036	6.6763	5.37752	5.84615	5.64415	5.87082	5.35189	5.56045	6.14392	5.90521	6.01511	5.57299	5.81282	5.38541	6.04135
Cep97	6.82768	7.18558	7.46684	7.06912	6.93325	7.62373	6.75296	7.11169	5.75236	7.14247	7.55792	6.32535	7.46636	6.46229	7.63998	7.16399	6.76782	6.65838	7.47641	7.4651	7.28206	5.47095
Cep104	5.66636	5.65401	5.73252	5.03874	4.88814	4.5124	5.53245	5.11812	5.89702	5.49248	5.64878	5.92864	4.79059	5.19433	4.9373	5.08899	5.67518	5.82065	4.80769	4.8178	4.96145	5.29254
Cep112	5.37286	5.4754	4.59171	4.92976	4.7428	4.22401	4.92297	4.83915	4.85951	5.4711	5.28987	4.69483	4.22197	5.10359	4.95921	5.33748	4.42537	4.21679	4.54787	4.78296	4.94159	4.62459
Cep120	7.50534	7.74856	7.77239	7.75031	7.21006	6.8761	7.61054	8.35561	7.82829	8.08468	7.69353	7.44845	6.26579	8.27981	7.94077	7.70834	6.90792	7.28882	7.97607	8.05607	7.52729	7.78096
Cep126	3.84413	3.85029	4.16718	4.11669	4.24076	3.65193	3.64842	4.23753	3.75555	4.34646	4.68951	4.11328	4.33379	4.24088	4.02402	4.97363	3.99907	3.64766	4.02166	3.6532	3.65785	3.65821
Cep128	6.05167	5.27055	5.36424	5.50082	6.01635	4.6835	5.72285	6.7388	7.12234	5.88713	4.44778	4.52302	4.88489	6.59273	5.15667	5.35476	5.80069	5.32937	6.4084	6.24297	5.70231	5.65954
Cep131	3.89568	4.20651	4.28075	4.08716	4.54924	4.18939	4.32992	4.09851	4.54377	4.6244	3.88673	4.38699	4.16715	4.57251	4.15281	5.10833	4.51634	4.23217	4.49393	4.27113	4.4656	3.89617
Cep135	6.95033	6.9417	6.48915	7.01695	7.06718	5.6602	6.93976	6.89277	5.09061	7.46761	6.33625	7.01003	6.68442	6.99046	6.46883	5.85102	6.36685	5.91574	6.77448	6.70705	6.61833	6.3125
Cep152	5.82628	4.77825	5.61857	5.33808	6.05276	4.56668	5.93062	5.4151	5.90794	5.2667	5.81842	6.31708	5.248	5.88349	5.15921	5.75138	5.78715	4.98095	4.71953	5.48713	5.48401	5.6466
Cep162	6.46254	6.41224	6.33951	5.73862	6.92919	6.3351	5.98159	6.85683	6.53958	6.24182	6.61196	6.82593	5.73565	6.20166	6.74932	6.51042	5.99867	6.10931	6.22474	7.03029	6.32088	5.06887
Cep164	7.25805	6.69182	6.97091	6.44645	7.12057	6.22294	6.79136	7.32508	7.5944	6.7861	6.98286	7.10288	6.94268	6.54617	6.39089	6.55117	6.2365	6.03405	6.19691	6.3115	6.22632	6.84257
Cep170	7.94836	7.83059	8.23339	7.57123	7.7956	8.15727	7.61548	7.0634	8.11021	7.65322	8.09184	9.04451	8.94354	7.30017	9.01286	8.52497	6.65173	7.86251	8.05886	7.45064	7.49712	7.53309
Cep192	8.52302	8.9037	8.36842	8.55056	8.52988	7.43173	8.65955	7.47186	8.21943	8.08722	7.7398	8.93338	7.44362	9.15641	8.58045	8.36295	7.79376	7.98626	8.50727	8.97525	8.47667	8.65085
Cep250	6.59435	5.73878	6.57464	6.831	7.04283	5.97489	7.12801	7.10501	7.1943	6.38232	7.25196	6.74366	6.55832	5.95604	6.63757	6.21052	6.42279	6.32739	6.54853	5.86677	5.86905	6.72147
Cep290	6.01831	5.97649	6.62202	6.91772	6.98703	6.95694	7.0171	6.73898	6.30033	7.01471	6.96883	6.51955	7.30669	7.29856	7.35146	6.47501	6.70425	7.32552	6.71404	6.51469	7.34249	6.72516
Cep295	6.92939	7.27824	7.09775	7.69306	7.19662	7.5713	7.49344	7.17936	7.2463	8.07242	7.76688	7.76229	8.19896	7.73041	8.11159	7.64313	6.83091	7.46969	7.41768	7.74835	7.64842	7.59781
Cep350	7.10174	8.07406	8.00286	6.91637	7.96022	6.38726	7.22836	6.98272	6.94267	7.54086	7.9795	8.93065	8.31848	7.60381	7.78284	8.07773	6.67363	7.33858	8.07157	8.314	7.24678	7.7717
Cept1	9.35155	9.05797	9.60516	9.36102	9.43868	9.36674	9.31116	9.18625	9.10016	9.37799	9.83958	9.75377	8.91379	9.92311	9.94756	9.8626	9.16003	9.74067	9.21595	10.286	9.79493	9.90026
Cercam	4.08323	4.9622	4.24083	4.40522	4.07593	4.81635	4.15473	4.0671	4.4277	4.71078	4.73784	4.47739	6.24659	4.89205	4.83437	4.97766	5.91734	5.18556	4.60803	6.03262	5.51667	6.21755
Cerk	5.02963	5.5848	5.35843	4.49258	4.97595	5.36735	5.4712	4.46789	5.92171	5.35414	5.42106	5.523	5.0393	4.38788	4.83973	5.10402	5.096	4.96037	4.91861	4.9182	5.60337	5.01819
Cers2	10.4417	10.5017	10.4096	10.457	10.2707	10.2251	10.0632	10.2448	10.4409	10.0605	10.7825	10.067	10.5268	10.2818	10.2192	10.1741	10.6197	10.2529	10.4469	10.0759	10.0487	10.166
Cers4	6.90517	7.40106	6.21068	6.59106	5.97296	6.93662	6.26553	7.37287	6.70779	7.23537	7.74736	7.42466	6.91431	7.5655	6.9107	7.73694	6.72155	6.65489	6.91731	5.17236	6.08712	5.66545
Cers5	9.99722	10.0158	9.83084	9.9585	9.72867	9.72179	9.25945	9.61859	9.25581	9.77963	9.92244	9.74719	9.21043	9.8947	9.35506	9.92498	9.20869	9.56914	9.88449	8.66228	8.87876	9.12422
Cers6	4.1647	4.75647	4.58557	4.7262	4.83495	5.26411	4.08531	4.09686	4.89267	5.02787	5.88309	4.08606	4.64865	4.24989	5.48882	4.50448	4.70121	4.66903	4.29039	5.98889	5.48712	5.87196
Cetn2	8.64097	8.65937	8.7028	8.69089	8.90355	8.79355	9.00117	8.5598	8.44665	8.24805	8.29195	8.77346	8.71876	9.00456	8.91325	8.61811	8.77495	9.1879	8.69569	9.67582	9.18958	9.15215
Cetn3	10.0311	10.06	10.308	10.0301	10.0677	10.559	10.2743	9.93597	10.125	10.5526	10.0519	10.475	10.6808	11.4117	11.3495	11.5293	10.6589	11.302	10.7059	11.7061	10.9954	10.2068
Cetn4	3.17135	3.13629	3.50621	3.36256	3.13744	3.13588	3.13435	3.49627	3.53294	3.13722	3.40548	3.51009	3.13535	3.44278	3.71024	3.1878	3.20866	3.52344	3.40339	3.55167	3.60952	3.26554
Cfap20	9.63045	9.39194	9.56467	9.2222	9.44758	9.77585	9.45776	9.37023	9.50189	9.27888	8.89041	8.52092	8.68388	9.47706	8.85674	8.07108	8.61374	8.77134	9.25005	8.61039	8.55991	8.58533
Cfap36	8.01333	8.10597	7.72202	7.69649	7.72419	7.759	7.90439	7.59803	7.39131	7.97139	8.18204	8.19553	7.58252	7.93091	8.09871	7.64524	7.62474	8.00476	7.65935	8.19238	7.96591	7.40829
Cfap44	3.22055	2.8596	2.85826	3.20253	2.89379	2.85916	3.15819	2.85956	3.15242	2.95307	2.89976	3.5781	2.85861	3.2719	3.78484	2.85764	3.14689	2.8572	2.99427	2.85975	2.8619	3.29811
Cfap97	7.469	7.36376	7.4735	6.44413	6.28315	7.18058	7.6258	7.35897	6.00592	7.12375	5.99411	7.44828	7.75333	7.05108	6.02492	7.75619	7.51775	7.02122	7.2516	7.90428	7.31838	7.0154
Cfdp1	10.7897	10.797	10.3256	10.7464	10.4159	10.5358	10.5904	10.8476	10.6264	10.3865	9.75906	9.89028	9.61606	10.0707	9.62489	9.85095	9.86108	9.76304	10.2193	10.092	9.83818	10.0891
Cfl1	13.8406	13.8147	13.7525	13.7704	13.7567	13.9051	13.7628	13.654	13.5117	13.4529	13.1527	13.2772	13.1059	13.2663	12.9019	13.2123	13.4292	13.0308	13.608	13.0275	13.5644	13.7987
Cfl2	10.0968	10.353	10.5771	10.436	10.2938	10.3518	10.2647	10.2249	10.6114	11.0031	10.6531	10.6412	10.8342	11.1847	11.2182	11.1494	10.3576	10.8074	10.8145	9.59854	8.15021	7.33164
Cflar	7.31655	7.38093	7.55899	7.28653	7.24253	7.87928	7.21004	7.84394	7.23192	7.4978	8.08034	8.31833	8.21845	7.5809	8.06657	6.4781	6.88304	7.4368	7.20456	7.12674	7.61408	6.81838
Cfp	4.36249	4.10328	4.4146	4.12107	3.86862	3.85973	4.05844	4.36681	4.99172	4.89626	4.70448	4.92468	4.4598	4.48527	3.8976	3.94869	4.61852	4.36675	4.01164	5.06068	5.77981	6.26954
Cggbp1	9.35899	9.40682	9.60512	9.97334	9.58525	10.0162	9.83701	9.04835	8.9299	10.1562	9.91231	9.68449	9.28409	10.6485	9.39923	9.53185	9.90273	10.3287	9.81289	9.73569	9.67316	9.44869
Cgnl1	8.19555	8.70219	7.90409	8.83656	8.91982	8.41073	8.68681	8.42383	8.93957	8.39061	9.34807	9.15883	9.67095	9.23063	9.13931	9.23057	6.23859	6.68475	8.36358	5.22322	4.42088	4.43182
Cgrrf1	8.13075	8.00568	8.25927	8.07476	7.84102	6.9846	7.96822	8.26797	8.36571	8.07071	7.58204	7.85368	8.2158	8.00475	7.76009	8.15084	7.25965	7.53446	7.77655	6.58337	7.54619	7.0887
Chac1	4.37607	3.5497	3.54671	3.89993	3.55238	3.54873	3.94916	3.54962	3.55158	4.2666	4.86898	4.17568	4.31303	3.8824	3.54772	4.41663	3.89363	4.24408	3.70401	3.55003	3.55481	4.46913
Chac2	5.75855	5.70861	5.46946	5.98037	5.16268	5.53647	5.43702	5.92855	6.11064	5.58684	5.62157	6.7958	5.69584	5.48311	5.98939	5.93123	5.48645	5.74355	4.96446	6.09492	5.56878	6.24544
Chad	4.03957	4.05303	4.53665	3.57118	3.57558	3.92582	3.56683	3.57226	3.57462	3.57497	4.55983	4.23712	5.03319	3.56465	4.70049	4.42342	4.52704	4.27831	3.76036	3.57276	3.5785	3.57894
Chaf1a	7.33155	6.96425	7.2357	7.56032	7.9596	7.063	7.5637	7.53293	8.19169	7.87154	7.06971	6.57251	5.26402	6.87108	7.46604	6.62725	7.80899	7.3987	7.24665	7.36518	7.27051	8.09531
Chaf1b	9.05074	8.82984	8.19217	8.97179	8.93568	9.4075	8.77592	8.60484	9.12444	8.97066	7.41045	7.23401	6.73733	7.77959	7.29594	7.43797	9.00292	8.79309	8.48738	8.52853	8.93728	8.64466
Champ1	7.19757	6.93894	6.14979	6.94807	6.77786	7.64171	6.81227	6.76746	6.61695	7.05862	6.93463	6.4113	5.90598	5.56331	6.45035	5.853	7.218	7.37983	6.36442	7.71023	7.0287	7.42705
Chchd1	8.63219	8.47727	9.04147	9.39692	9.14087	9.68818	9.06086	8.85355	8.88163	8.79889	8.87268	8.81206	9.26244	9.68198	9.51454	9.43626	9.42304	9.68151	9.43593	10.1573	9.39129	8.96379
Chchd2	11.9091	11.9034	12.0733	12.0607	11.9873	11.7141	11.9129	11.8883	12.1036	12.2855	11.8107	12.0506	12.2248	12.3092	12.6882	12.816	12.1362	12.588	12.0475	12.9523	12.6606	12.2673
Chchd3	9.74785	9.33824	9.47702	9.72161	9.57445	9.95519	9.8482	9.65626	9.01695	9.07427	9.15895	8.9912	9.26125	9.62363	9.27983	9.80764	9.92181	9.85688	9.39077	10.4693	9.53945	9.6866
Chchd4	8.73933	8.28395	8.42661	9.50537	9.29898	9.85046	9.27798	8.80925	8.83535	8.84892	8.15224	6.86506	8.06439	8.52644	9.29534	8.00896	9.96107	9.71435	9.76746	9.94552	9.30172	8.91169
Chchd5	6.92543	6.80697	6.93246	6.60078	7.0955	6.86423	6.53358	6.65813	7.03415	6.84297	7.29069	6.80069	7.07178	6.75589	6.77559	6.73498	6.82685	6.43368	7.01508	6.67939	7.05523	7.21209
Chchd6	7.58979	7.54439	6.99889	7.92328	7.21327	7.6475	7.6022	7.38253	7.90912	7.46748	6.45308	6.96538	6.11434	7.19185	6.81602	7.37995	7.87888	7.75085	7.87911	7.07518	6.98989	7.42373
Chchd7	8.20167	7.96756	8.08625	8.21097	8.22424	7.82301	8.01644	8.05216	8.26386	7.90557	7.87949	7.80152	8.35547	7.93788	8.08686	7.87845	8.29188	8.02129	8.00402	8.29309	7.99656	8.31109
Chchd10	4.39037	3.6742	3.88259	3.66643	3.58293	3.57396	3.56495	4.00731	4.5402	4.40638	4.21306	3.56568	3.73365	3.7058	4.207	3.85178	4.7237	4.06782	3.91113	5.92122	4.9219	5.83127
Chd1	8.6145	8.42035	8.32763	8.77359	8.76755	8.99341	8.57594	8.77339	8.89854	8.58775	8.26468	8.97069	9.51571	9.28923	8.67925	8.88825	8.23833	8.75703	8.87936	8.21966	8.31307	8.22839
Chd1l	6.54428	6.47613	6.79941	5.87727	6.80931	6.5055	6.58958	6.94062	7.06609	6.64842	6.04428	6.86802	4.86812	6.02569	6.1434	6.54287	6.57288	6.89596	6.7118	6.88928	6.42427	7.24135
Chd2	6.7173	6.78018	6.3258	6.34416	6.9593	6.19506	6.82531	6.44809	7.0578	5.50387	7.06848	6.47127	6.56938	6.72192	6.08627	5.99226	6.24436	6.77331	6.38637	6.24525	6.79743	6.67749
Chd3	5.68122	6.61677	6.5784	4.54836	5.70737	5.60655	5.57478	7.22814	6.6447	6.42508	7.35898	7.38271	7.70414	6.40659	6.69075	6.74992	5.31129	4.87242	6.08515	4.43296	5.6094	4.47889
Chd3os	4.74973	4.45385	4.91632	4.13277	4.88273	4.01316	4.50476	4.51	4.01728	4.56439	4.55216	4.92618	4.01138	4.44111	4.97993	4.00825	4.95222	5.26552	4.94505	5.27439	4.02192	4.02244
Chd4	9.01207	9.60123	9.30091	9.12796	9.34819	8.98718	9.09887	9.24365	9.51001	8.9037	9.48225	9.44504	9.90604	9.36299	9.02486	8.797	8.82306	8.59382	8.98535	8.3714	8.8801	9.21997
Chd6	7.4575	7.86119	8.14193	7.88342	7.61072	7.22592	7.50887	7.98195	8.11968	8.44363	8.66063	8.69708	9.00806	7.75865	8.66324	8.02045	7.39128	7.1165	6.80154	8.48548	7.85847	7.36748
Chd7	8.50871	8.73445	8.39991	8.47914	8.34288	9.12313	8.31266	9.19085	9.1254	9.17784	8.62685	8.86567	8.46397	8.33082	8.38384	8.25434	7.85891	8.42621	8.10805	7.70839	7.63965	7.63158
Chd8	7.2343	7.67805	7.58716	7.47676	7.73179	7.29664	7.46638	8.09842	7.6912	8.0304	7.91283	7.87292	8.66979	7.37005	8.26525	7.88861	6.82823	6.56499	6.97584	7.15406	7.52518	7.09857
Chd9	7.51547	7.31148	7.03258	7.04078	7.88809	5.8173	6.65928	7.79976	7.97438	7.7068	7.33884	8.00739	8.40717	6.15677	7.64807	7.85132	6.86658	6.62851	7.34415	7.73499	8.38086	7.58968
Chek1	8.25717	8.24323	7.56204	8.28444	8.07827	8.17846	8.69743	9.17275	8.56675	8.83298	6.59625	8.16451	7.56646	9.05195	8.8826	8.33359	8.73564	9.64671	8.41222	9.68644	8.90907	8.55763
Chek2	8.2163	8.17522	7.71818	8.05955	8.29347	7.28997	7.09283	8.61906	7.95023	8.24057	8.67713	8.3578	8.54644	8.72003	8.38523	8.48855	8.66804	8.7097	8.48391	8.53412	8.62128	8.55382
Cherp	7.76774	7.30994	7.6738	7.42819	7.90291	7.41107	7.23804	8.02476	8.11749	7.89214	7.42424	7.68414	7.25377	7.21419	7.39231	7.54671	8.21869	8.02144	7.56829	6.76879	7.16471	7.4499
Chfr	7.06914	7.49364	7.57094	7.70934	8.04084	6.76125	7.13785	7.13148	7.38525	7.56168	7.47989	7.4171	7.71494	6.97807	7.30807	6.59535	7.50136	7.51055	7.07356	7.29561	7.66273	7.89726
Chic1	4.09381	4.30203	5.57343	4.3183	4.5298	5.01967	4.07189	4.69902	4.36184	5.35208	5.80496	5.65122	4.8171	4.86682	5.75255	5.07282	4.74242	5.12306	4.65547	4.08323	4.09411	4.09493
Chic2	6.57001	6.21676	7.07882	6.51146	7.27966	6.08664	6.18088	5.8215	7.04174	6.14927	7.29406	6.65315	8.21899	7.92301	7.74391	8.17695	6.48084	7.14118	6.51075	7.2274	7.04975	7.09425
Chid1	6.66885	7.15698	6.89622	6.7469	6.97883	6.56784	6.4433	6.24976	7.12284	6.68198	7.016	5.38526	6.74407	7.01265	7.11966	6.7692	6.35818	6.4597	6.52979	7.26923	7.13049	6.60495
Chka	7.36247	7.47893	7.01599	6.56515	6.59057	7.24428	7.3959	7.50213	7.66045	7.81027	7.09655	7.40793	7.65095	7.65163	8.06662	7.61806	8.10945	8.1092	7.4896	6.97432	7.29898	8.36623
Chm	8.41131	7.4684	7.76357	8.26366	7.98555	7.8593	8.60477	8.61719	8.2391	8.62256	8.61326	8.75683	8.36986	9.39391	8.34017	9.5102	7.98147	8.07688	8.35537	8.29337	8.46667	7.95819
Chml	5.93713	6.89823	6.7987	6.28762	6.80848	7.42307	6.72631	4.72226	5.25068	6.71187	4.63967	7.21281	7.2877	7.81615	5.86144	4.46886	6.71089	7.50171	6.53923	5.08158	7.52669	6.98805
Chmp1a	7.80426	7.00304	8.42581	7.0339	7.47823	6.75498	7.30691	8.14085	8.09303	8.31126	7.50379	8.11778	8.01755	7.67141	7.28816	7.48698	7.70155	7.94451	7.71191	8.04888	7.84762	8.37653
Chmp1b	8.75401	8.75201	9.00941	8.35162	8.55655	8.65261	8.85404	8.12526	8.42431	9.10803	9.39582	8.82385	9.85455	9.50664	9.23571	9.8092	9.16831	9.81988	9.08512	9.81583	8.84477	8.79422
Chmp2a	9.41109	8.91795	9.09232	9.20016	9.0704	9.77095	9.2186	8.81835	9.13582	8.40929	9.16572	9.32595	8.62722	8.64869	8.09689	8.68744	8.71079	8.67528	8.96586	8.65168	9.19484	9.11269
Chmp2b	9.51617	9.80644	9.68988	9.15823	8.82783	9.13728	9.04965	9.30011	9.31004	9.52033	9.24681	9.50867	8.84229	10.0044	9.79948	9.95385	9.65587	10.2425	9.29797	9.43863	9.32756	8.23749
Chmp3	8.90129	9.20855	9.52846	9.11184	8.74726	9.25334	9.04346	9.24209	9.18342	9.71026	9.06098	9.21649	9.12845	9.32187	9.57001	9.56931	9.73326	10.0707	8.88409	9.05927	9.553	9.39023
Chmp4b	4.33393	4.57207	4.60137	4.92436	4.69652	4.93712	4.42596	4.12227	5.54335	4.3053	4.21628	4.90244	5.08525	4.96932	4.14971	4.23503	4.26472	5.17347	4.83791	5.52754	5.09578	4.92265
Chmp5	9.96286	9.68951	10.0777	9.56171	9.53826	9.74754	9.53775	9.53679	9.92255	10.3379	10.1734	10.6289	10.0084	10.2622	10.9254	11.0318	9.37361	10.2579	9.60431	10.3867	10.1594	9.22984
Chmp6	8.71975	8.12959	8.56837	7.73223	8.05794	7.7821	8.25709	8.14318	8.38095	8.22436	7.87678	8.50865	8.30018	7.93953	7.71255	7.47265	7.856	7.62509	7.9942	7.42785	7.54773	7.85902
Chmp7	7.41317	7.83985	7.66335	7.59358	7.10745	7.36643	7.81669	7.72862	7.89688	7.44265	6.72593	7.60617	7.06023	6.40067	7.24646	7.27326	7.7348	7.78496	6.85525	7.08063	6.7204	7.65853
Chn1	6.03175	6.34273	6.14423	6.31127	6.3478	5.53828	6.43769	6.4022	6.55095	6.56525	6.06085	6.03335	4.59408	6.0384	5.95673	5.79339	5.30917	5.47856	5.69346	4.74394	4.62751	4.62912
Chn2	5.62134	6.15516	6.12839	5.19025	5.73075	5.55429	6.22308	6.22868	5.96705	6.41581	5.3787	5.91789	6.07326	4.91127	5.61929	5.13094	6.20513	5.60578	5.60275	5.52639	5.6974	6.10343
Chordc1	10.1164	10.262	9.90068	10.5659	10.2434	10.8082	10.6337	10.1805	9.95787	10.8476	9.87675	10.1882	10.3475	10.7645	10.4068	10.5309	10.4947	11.0667	10.7266	10.8972	10.5412	9.39947
Chp1	8.28627	8.03977	7.99759	8.04359	7.87738	7.61444	8.24673	7.84733	7.75937	7.78278	8.4949	8.31813	8.43441	8.29738	7.96765	6.86461	8.1894	8.33761	8.2691	8.34491	8.16912	8.3615
Chpf2	5.66942	4.8299	5.7566	4.96557	5.10752	4.4465	5.33268	5.36423	5.62	5.96258	6.0781	6.13155	5.89934	4.68312	5.56193	5.97537	4.74611	5.17561	4.71737	4.88725	4.87048	5.30917
Chpt1	3.48024	3.99202	4.13683	3.47365	4.0983	3.47365	3.82011	3.47464	3.47681	3.51741	4.46661	4.38154	3.5031	4.86506	3.47253	3.46987	3.52445	4.73678	4.35515	4.01961	3.48038	3.76449
Chrac1	7.86764	8.30731	7.92169	8.46318	8.38234	8.31974	8.31244	8.42893	8.53318	8.24859	8.27611	7.97466	9.05225	8.57369	8.94082	9.183	8.76689	8.62178	8.61245	9.53116	9.16762	8.7435
Chrdl1	4.80339	4.67409	4.40687	4.56627	3.68982	3.54151	3.50037	4.14114	3.57177	6.63873	3.5075	6.31162	7.287	7.23195	5.42682	7.00732	3.50999	5.81922	6.49213	3.55558	3.60389	3.60738
Chrnb1	4.56632	4.78779	5.61914	4.26676	4.65178	4.26683	4.00339	4.52023	4.07662	5.25479	6.0344	6.52311	5.21622	4.14087	5.1854	5.58269	4.25903	4.51905	3.89596	3.91074	4.16419	3.92748
Chst2	6.88958	7.22755	6.86635	7.2708	7.20181	8.25246	7.04403	6.89975	7.50844	7.91499	7.86912	6.77964	7.3554	7.268	7.26765	7.87872	5.71302	6.39625	6.31674	6.25022	4.70612	4.71074
Chst7	5.47819	5.5959	5.16678	5.30733	5.61348	5.56431	4.95896	5.0991	6.17019	5.25035	4.66208	5.74059	5.41952	5.74224	5.30599	5.28033	5.12421	5.44245	5.21892	4.51014	4.51956	5.16498
Chst11	5.04504	5.84886	5.6413	5.33897	4.183	4.17234	4.78212	4.26164	5.27911	5.68782	4.32162	5.30125	5.98264	5.43839	4.16937	4.16226	4.23232	4.9024	4.16315	5.44246	5.40901	5.97991
Chst12	6.75276	7.01856	7.33897	7.29527	6.98281	7.26109	6.87607	6.67576	5.91098	6.83676	7.53377	7.2862	7.46864	7.29696	7.18805	7.28331	7.75092	7.73952	7.39189	7.25046	7.55822	8.02782
Chst14	7.25313	7.18115	7.81539	6.51049	6.52579	6.67337	6.45287	7.26057	7.31408	7.2136	7.96064	7.288	7.61228	6.69714	6.76581	7.07571	6.55239	6.37774	6.54567	5.31879	5.64551	6.62231
Chst15	5.32162	6.09319	5.7485	5.0028	4.92192	5.78613	5.15289	6.33578	6.26428	5.11888	6.0154	4.36138	5.21862	5.54698	4.98881	4.81761	4.73661	4.35803	5.11132	5.06342	4.8228	5.1179
Chsy1	8.23238	7.9133	8.36696	8.18088	8.13917	8.84941	8.3291	8.23163	7.90526	7.64637	8.36754	8.18328	7.92183	8.89051	8.47524	8.8621	7.84033	8.19898	8.24159	8.61318	7.91406	7.44616
Chtf8	7.23893	7.16456	7.27018	6.30571	6.87557	6.36592	6.83939	7.30441	6.65322	7.46828	6.94451	6.07596	6.83569	6.45818	6.57289	6.44569	7.5724	7.15618	6.61263	7.11262	6.67077	6.96646
Chtf18	4.75336	6.06568	5.31658	5.87854	5.60378	5.03349	5.6699	5.14919	7.03249	6.1536	4.45917	5.25734	4.85383	5.74414	5.52192	5.03771	5.97069	5.96286	5.23903	5.68741	6.17016	4.92409
Chtop	9.14571	9.62697	9.22247	9.10322	8.93245	8.97607	9.3201	8.99485	9.25121	9.81646	9.71696	9.15007	9.18253	9.32641	9.68786	10.0479	9.71214	10.0902	9.10119	9.7286	9.29622	9.49568
Chuk	7.60985	7.84453	8.22241	7.44649	8.45264	8.12452	7.87309	7.81774	8.21428	7.56853	8.34896	8.49135	8.40851	8.74133	8.25901	9.2561	8.51259	8.59547	8.59002	8.62579	8.55371	8.53032
Churc1	8.24656	8.62346	8.5434	8.02956	8.38222	8.61248	8.44536	8.84963	8.47051	9.02238	8.57269	8.69099	8.83053	8.80838	8.76404	9.36597	8.71061	9.1868	8.74338	10.0929	9.45072	9.3892
Ciao1	9.29156	8.57837	8.39258	8.62488	8.77337	8.52651	8.77203	8.59117	8.27798	8.22236	8.85064	8.63304	8.62312	8.67646	8.20994	8.73009	8.78236	8.40715	8.93981	8.64207	8.82631	8.72257
Ciapin1	9.76789	9.63583	9.09498	10.2385	9.86766	10.3163	9.89763	9.11464	9.48848	9.39189	9.25751	8.81155	8.6376	9.31578	9.21481	8.8404	9.47742	9.00843	9.82457	8.70967	8.92231	9.10073
Ciart	4.36915	4.84875	4.40801	4.7062	4.45798	3.98699	4.84362	4.80975	4.8794	4.34163	4.30737	3.98487	4.02435	3.98354	4.15209	3.98481	4.16076	4.27335	4.17062	4.49568	4.25887	4.3771
Cib1	9.17881	9.00121	9.19799	9.57674	9.10778	9.64171	9.30682	8.67774	9.57527	8.79562	8.86726	9.31331	9.37548	9.12284	8.65861	9.04948	8.96622	8.51728	9.69003	8.61967	9.25975	9.41093
Cic	5.84738	5.2347	5.96877	4.81589	5.17455	4.72333	5.70837	5.88214	5.84236	5.60142	6.05589	6.10842	5.56165	5.08969	5.78452	5.92069	5.79346	5.71615	5.28716	5.50877	5.81196	5.86386
Cinp	8.44338	8.60629	8.15439	8.85403	8.58487	9.01232	8.61195	8.20883	8.42117	8.74131	7.56573	7.81945	8.31287	8.24088	7.97233	7.85549	8.8776	8.76073	8.57517	9.09812	8.24743	9.0679
Cipc	5.90383	6.50491	6.12889	6.43723	6.54248	5.62116	6.32656	6.23141	5.96649	6.7273	4.99328	6.53963	6.20893	5.82855	6.34963	6.89808	6.81711	6.39434	6.57617	6.60557	5.43908	6.71643
Cir1	6.67529	6.62707	6.63244	6.58402	6.82582	6.50708	6.55457	6.83631	6.70196	6.70574	6.82369	7.45234	7.50279	7.23799	6.67949	7.12688	6.74754	7.17432	6.61108	7.28422	6.76176	6.61987
Cirbp	7.35148	7.33863	6.98843	6.50593	6.66547	7.16277	6.36926	7.15753	6.79956	6.91726	7.62538	7.21886	6.87411	6.84297	7.10902	6.75789	7.37744	7.61349	7.18775	7.18773	7.00871	6.47956
Cirh1a	8.85873	9.17074	9.48306	9.75191	9.0873	9.45357	9.67171	8.76591	9.22052	9.27195	8.93795	8.50806	8.21484	9.05865	8.39843	7.64785	9.29635	9.34534	9.6887	9.89078	9.01695	9.66584
Cisd1	8.87746	8.45285	8.76955	8.92053	8.8872	8.97709	9.06705	9.08631	8.63918	8.64464	7.90314	8.68605	7.58025	8.21403	8.96164	8.52431	8.9208	8.89374	8.82742	9.11692	8.74597	9.08222
Cisd2	8.63426	8.71421	8.78364	9.09996	9.08093	8.9959	8.85959	9.07459	9.04057	8.96635	9.31677	9.25066	8.34518	9.20542	10.4341	9.60469	9.83437	10.4149	9.56115	10.2389	9.48399	9.57015
Cisd3	6.19744	6.39046	6.21751	6.01392	6.3573	6.32656	6.34318	6.36419	5.94546	5.92913	6.05654	6.10538	5.70575	5.89322	5.82654	5.96117	5.41644	5.8957	6.16034	5.80585	6.10039	6.26219
Cish	5.44633	5.69083	5.22011	4.65324	5.00405	3.91305	4.48876	5.2449	4.44338	5.80062	4.41026	3.90558	4.91326	4.06966	3.91079	4.10448	4.36108	3.90316	3.99982	4.30134	3.92656	4.63191
Cit	5.90645	5.37647	5.0413	5.42304	5.86266	4.88942	5.66103	5.31386	6.07684	5.64193	4.59424	6.12219	5.92941	5.43911	5.27727	5.07583	5.28647	5.04093	5.42724	5.48514	5.49021	5.5831
Cited2	4.19633	4.14861	4.36007	5.41876	5.08759	4.21392	4.85135	4.14784	6.27099	5.47964	4.10736	5.94706	5.85423	6.62809	5.50969	6.16406	7.06248	7.00431	7.00234	7.20604	7.29525	7.39567
Ciz1	7.41514	7.09588	7.12481	6.56639	6.78593	4.97439	6.79769	7.18964	7.58711	7.03652	6.3726	7.24485	6.36543	6.97069	6.93565	6.54142	7.25617	6.83676	6.3746	5.84488	7.02704	7.24118
Ckap2	9.10984	8.84244	8.37007	9.07957	8.8513	9.22121	9.09687	8.64512	7.95539	8.79648	4.28152	7.7266	8.30933	9.94235	9.61203	8.78977	9.26559	9.48979	9.48497	8.55217	9.22763	8.10325
Ckap2l	9.00541	8.62816	7.79378	9.34448	8.965	8.55298	9.40033	8.6104	9.10026	8.65535	4.92878	7.61451	6.86451	9.66022	8.79726	8.62401	9.15656	7.97142	8.85291	9.14368	9.50159	8.93723
Ckap4	7.76303	7.91804	8.1355	8.22836	8.52879	7.77424	8.27027	8.26138	8.34927	7.95983	8.65904	9.09308	8.74963	7.83861	8.26359	8.07418	6.58173	6.12835	7.93139	6.77657	6.84713	7.29219
Ckap5	9.42614	9.00345	8.7403	9.16611	8.92865	9.64057	9.43242	8.7919	9.03753	8.92741	7.56849	8.34517	9.28332	10.1155	9.27557	7.2888	8.67134	9.23924	9.48616	9.53951	9.62176	9.25194
Ckb	7.75428	6.58065	7.39134	5.63617	6.75928	6.09584	6.51546	6.87279	5.21055	6.50387	5.49844	5.90941	5.27827	5.18277	6.32258	5.46722	6.24238	6.3634	6.10632	8.85026	9.54463	9.99254
Cklf	7.13968	7.11044	7.23597	7.44588	7.50749	6.818	7.33536	7.29851	7.24789	7.82773	6.66598	6.93046	7.57351	7.72284	7.54285	7.01611	7.34514	6.98058	7.36416	8.19347	7.89766	7.42237
Cks1b	11.6173	11.2732	11.0613	11.6651	11.565	11.8463	11.7882	11.4857	11.4326	11.1475	9.96728	10.5495	9.92805	12.1515	11.5461	11.2441	11.3514	11.5031	12.0105	11.2979	11.2498	11.2446
Cks2	10.3461	9.76792	9.62835	10.5107	10.2876	9.97763	10.2138	10.0692	10.0806	9.94001	7.62872	9.45052	8.53566	10.4101	10.408	9.14868	10.2327	9.84877	10.36	11.1677	11.1157	10.8245
Clasp1	8.23822	7.87582	7.86964	8.08383	7.92274	7.64538	7.61007	8.12351	7.83048	7.27061	7.73195	8.72486	8.47212	7.5604	7.72596	7.66288	7.35639	7.34821	6.60333	7.90669	7.24396	6.97907
Clasp2	9.07877	9.03768	9.20463	9.04721	8.97138	9.3568	9.4665	9.23386	9.13769	8.96202	9.60109	9.90325	9.40311	10.2306	10.0568	9.71706	9.51552	9.6156	9.29959	10.8247	9.86102	9.45277
Clasrp	6.91702	6.52584	7.09234	5.29651	6.22654	5.41977	6.8118	7.47149	7.07564	6.89187	7.18065	6.7697	7.10527	5.99068	7.13041	7.2817	6.79768	6.70189	6.44461	5.54807	6.43033	6.97394
Clcc1	7.49499	8.06934	7.95379	7.49758	8.02264	7.04202	8.07166	7.47979	7.02804	7.64173	7.65147	7.95882	7.83801	7.17849	7.84378	8.01603	7.84188	7.93046	7.14656	8.29634	7.96399	8.32178
Clcn3	7.24802	7.7201	7.50403	7.95134	7.32881	6.8595	7.97246	7.61233	6.64607	7.30078	8.18736	8.4033	8.31356	7.50508	8.44741	8.15756	7.20823	7.21233	7.96757	8.16668	7.0807	7.47323
Clcn4	7.85443	8.17699	7.3286	7.31792	7.8969	8.2621	7.88062	7.3698	7.85016	7.72945	7.69893	8.50456	7.90208	7.79834	7.88278	7.72214	6.86864	7.28147	7.4329	8.03951	7.3742	7.64418
Clcn5	4.36908	3.68628	3.71448	3.76046	4.43232	3.62089	4.49247	3.59058	4.66618	3.63051	3.58652	4.32599	3.61708	3.62381	4.09688	3.5861	3.9688	3.70981	4.38429	3.65735	4.77784	4.30766
Clcn6	5.31992	5.47626	4.67553	5.00991	5.4071	5.21956	5.04573	5.32097	4.48952	5.4016	5.61639	5.04671	5.34604	4.96874	5.14708	5.44069	4.67851	4.72134	4.79991	4.84059	4.96321	4.94792
Clcn7	7.32246	7.01942	7.40153	6.7416	6.55791	6.05684	7.01747	7.44349	7.52541	7.33828	7.30867	7.64463	7.15174	6.9422	6.95227	7.27201	6.87397	5.99356	6.85659	7.10121	6.35055	7.46102
Cldn5	12.2028	12.3895	12.0433	12.0016	12.137	11.701	11.9344	12.3474	12.2289	11.9132	12.7427	12.4551	12.304	11.4262	11.2505	11.7287	8.20905	9.33533	10.7989	4.36825	4.74005	4.63479
Cldn12	5.81776	7.6339	7.14092	7.11058	5.73222	6.69894	6.99274	7.13102	8.05205	7.42636	7.16907	5.28847	5.71393	6.0696	7.3277	7.55153	7.68361	8.34533	7.45189	6.4237	6.03793	6.16688
Cldnd1	10.0199	9.40922	9.61282	9.48406	9.66587	10.03	9.60521	9.70167	9.22395	9.56228	9.94701	9.04943	9.96381	10.421	10.2456	9.68672	9.07763	9.41054	9.74697	9.47959	8.56884	8.67714
Clec1a	6.21158	6.87802	6.02531	5.66311	6.32402	4.78697	4.75224	6.17572	5.71727	5.74928	7.79093	7.03595	6.62505	7.1925	7.23294	7.69041	4.26135	4.11189	5.81172	4.17945	4.23061	4.23432
Clec1b	9.3958	9.20796	8.75732	9.8668	9.63128	10.6399	9.65177	9.68271	8.69045	9.15351	3.63499	5.02004	3.72922	8.45559	5.87308	5.82244	4.83874	4.80039	7.86028	6.78633	7.77369	8.67383
Clec4e	3.44628	3.39585	3.3629	3.38533	3.4236	3.38536	4.10898	3.39504	3.41552	3.41847	5.44494	5.59368	6.90628	5.77064	9.3747	5.56714	6.30847	6.84272	4.76022	3.39938	4.03771	3.88559
Clec9a	5.25233	4.2592	4.77026	5.42492	5.50223	5.07145	4.54514	4.72223	4.53606	4.68405	4.91709	4.60851	4.57803	4.40304	4.88042	4.48078	4.03615	4.03361	4.28495	4.04267	4.05024	4.32944
Clec14a	9.78837	10.6667	10.8943	9.94523	10.1841	9.37724	10.0148	10.2027	10.0598	10.1231	12.3653	11.7478	12.3659	11.2526	11.6761	11.2864	7.40649	8.89623	10.3136	4.13037	4.36906	4.38514
Clec16a	3.91732	4.42183	4.44156	4.43831	4.32985	3.91233	4.15693	3.93968	4.49835	4.57787	4.36473	4.49212	4.65621	4.13311	4.19022	4.50801	4.2714	4.25446	4.31395	4.15206	4.28715	4.53293
Clic1	11.807	11.7673	11.5186	11.8464	11.7071	11.8667	11.817	11.561	11.5253	11.265	11.4852	11.3114	11.0103	11.3592	10.6914	11.0663	11.1774	10.8079	11.4582	10.8495	11.5342	11.7133
Clic4	10.2894	10.1846	10.0581	10.004	10.1843	9.94586	10.129	9.81605	9.87061	10.042	9.30266	9.17591	9.73174	10.0271	9.73064	9.95338	9.15736	9.50947	9.37041	9.0138	9.08422	9.43104
Clint1	7.90749	8.04512	8.04933	8.43168	8.43359	8.4912	7.81394	7.85692	7.86533	8.08173	8.37322	8.49461	8.11332	8.30789	8.17608	7.73535	8.02616	8.16589	8.69072	8.02366	8.18582	8.81807
Clip1	7.56234	7.5086	7.51044	7.59966	8.13063	7.56325	7.69754	7.58433	7.31866	7.126	7.68643	8.02512	7.039	7.63653	7.31237	7.09325	6.19862	6.74605	7.16047	7.13538	6.77024	7.14021
Clip3	4.58769	3.94707	4.23439	4.10478	4.07424	4.56012	4.77452	4.35532	4.29425	4.18099	4.61229	4.05406	4.55262	4.21668	4.42896	4.0231	4.04349	4.29804	4.35728	4.28387	4.74872	3.9505
Clk1	10.8643	10.9519	11.3019	10.4801	10.3466	10.2666	10.372	10.869	11.1361	11.3849	12.1427	11.4901	11.9465	11.5249	12.2593	11.9032	10.83	11.9601	10.6723	11.8205	11.7097	11.0658
Clk2	6.05843	6.46218	6.81406	6.2353	6.9072	6.38113	6.08329	6.71093	7.21328	6.23084	6.6426	7.5328	6.73306	6.64763	7.0336	7.12562	6.2912	6.63059	6.6095	6.41494	7.00355	6.92607
Clk3	8.70576	8.50342	8.48972	9.05661	8.71483	8.59985	8.94807	9.04692	9.22319	8.53893	8.65674	8.73926	8.72127	8.15056	8.14498	7.94929	8.66648	8.28544	8.91859	7.89684	8.13727	8.92962
Clk4	9.08773	9.33876	9.35251	9.41156	9.05681	9.72677	9.32288	9.19124	9.89177	9.75334	9.50443	9.54666	10.1703	9.78024	10.2481	10.1915	9.24595	10.1539	9.59865	9.74601	9.07903	9.08386
Clmp	3.54361	3.95719	3.85876	3.3692	3.62908	3.85948	4.07121	3.54922	3.595	3.92042	3.36726	3.36705	3.96857	3.36571	3.62519	3.367	3.36739	3.36637	3.36719	3.62083	4.15044	4.14447
Cln3	7.46625	7.13727	7.69405	6.39379	6.98198	6.64446	6.98469	7.01441	7.25348	7.14971	8.11031	7.00818	7.52106	7.38981	7.54219	7.67721	7.68341	7.61301	7.78157	7.00452	7.76123	8.22188
Cln5	8.99425	8.85119	8.82975	8.68429	8.3724	8.85543	8.39296	8.7914	6.87509	8.42216	7.63671	7.67135	8.56543	8.64577	8.09838	8.48331	8.4651	8.82737	8.40679	9.09882	8.89778	9.44898
Cln6	5.01264	5.80505	5.31428	6.56404	5.76716	4.57697	5.77759	5.50478	6.94037	5.12992	5.48898	6.59253	6.55882	6.6476	6.43288	6.32442	7.49405	7.21136	6.38173	6.85947	7.15429	7.46252
Cln8	5.70767	6.58733	5.79443	6.16944	5.4712	5.02479	6.01359	5.14263	5.99386	6.01985	5.22417	5.84965	5.77379	6.22912	6.19366	5.69171	5.70288	5.87442	5.23973	7.04843	7.54028	7.32199
Clns1a	10.7013	10.64	10.5188	10.9635	10.6978	10.924	10.9891	10.8576	10.3471	10.5253	10.1795	10.0601	10.3197	10.694	10.3562	10.1096	10.797	10.8259	10.9712	11.2298	10.5603	10.6822
Clock	7.07523	6.73082	7.50021	7.21297	6.85427	6.45696	6.29365	6.98761	7.37536	7.22039	7.73573	7.90554	7.86778	7.4845	8.13388	7.67138	5.64277	6.60926	6.28509	6.98845	7.53997	5.83567
Clp1	8.64383	8.5159	8.27396	8.08742	8.48615	8.60091	8.41718	8.03167	8.69554	7.95739	7.97362	8.35686	7.9462	8.57915	7.22878	8.74036	8.52088	8.08743	8.331	8.39505	8.84369	8.68201
Clpb	8.37745	8.28411	7.8694	8.42991	7.85932	8.28956	7.94406	8.64108	8.14334	7.77783	8.2753	6.19388	7.64246	7.79341	7.0749	7.65427	8.42219	8.1261	8.31816	7.20357	8.01708	8.01935
Clpp	8.87465	9.08883	8.99296	9.71398	9.05681	9.5013	9.4215	9.35878	9.27098	8.99062	8.51672	8.85109	8.31452	8.91199	8.7119	8.61139	9.39437	8.95774	9.37653	8.97804	8.94745	8.97181
Clptm1	8.17831	8.75042	8.90381	7.77213	8.28195	7.74313	8.75343	8.80227	9.07727	9.49211	9.46976	9.06605	9.26951	7.96729	8.67118	8.53322	8.96836	8.16469	8.06095	8.11674	8.57722	8.83502
Clptm1l	8.06931	8.05409	8.49541	8.60881	8.71659	8.29444	9.22334	8.82436	8.5822	8.13045	9.08843	8.97331	8.83596	8.78295	8.61858	7.25894	8.61575	8.61768	8.14646	8.64978	8.76935	9.21214
Clpx	8.6847	8.34421	7.83827	9.11977	8.76096	9.55036	8.79455	8.63536	7.24557	8.7838	8.24053	8.69794	8.90763	8.82208	9.57482	8.44676	8.64451	9.00012	8.9044	8.51605	8.87653	8.52594
Clspn	7.2906	6.96405	7.45194	6.86739	7.61896	6.89132	6.673	6.84459	7.57978	6.91912	6.69496	7.25974	6.90991	6.30529	7.49724	7.09761	6.97401	6.96687	7.27236	7.71533	6.8935	7.58232
Clstn1	5.90365	5.9097	5.04667	5.5372	5.39423	5.30953	5.70508	5.35556	5.38705	5.42913	6.51367	5.72936	5.08751	5.85571	5.47188	5.91821	5.12074	5.17035	5.77078	5.00944	5.13711	5.17089
Clta	10.3499	10.3962	10.4817	10.3071	10.4749	10.2054	10.4151	10.4075	10.2338	10.5128	9.92536	10.1833	10.2346	10.3992	10.5147	10.7707	10.8212	10.9406	10.2186	11.3285	11.7552	11.3083
Cltb	6.68234	5.86134	5.6628	6.07301	6.32641	5.7105	6.24751	6.27746	6.27012	6.50659	6.49856	6.97125	6.31272	5.73289	6.38997	6.47708	7.04583	6.77398	6.27973	6.1085	6.3263	6.35253
Cltc	10.4744	10.8063	10.9228	10.9978	10.9343	11.0551	10.9976	10.4537	10.4216	11.0644	10.897	11.0232	11.24	11.3515	11.6083	11.5095	10.0908	10.7677	10.6288	11.3554	11.3688	10.9397
Clu	6.06773	5.55696	6.32269	8.50694	8.73575	9.06578	9.10961	8.65394	7.66292	8.2878	8.25918	9.44316	8.5848	9.66913	8.68434	9.12194	9.08989	8.72401	9.50638	5.91308	6.74846	5.79092
Cluap1	7.16087	6.7281	6.82317	7.09112	6.74739	6.59078	6.89216	7.0904	5.60439	7.20237	7.17552	6.64364	6.46105	6.87431	7.24326	6.80566	7.53446	7.52632	6.97295	7.06886	6.89813	7.15096
Cluh	6.00705	6.55359	6.36927	7.13864	6.56093	6.29014	6.54204	7.52397	7.98608	7.28297	6.3154	6.2639	6.9627	5.67729	7.03212	7.16682	7.62993	7.11211	6.77331	7.08451	7.43336	7.41277
Clybl	6.93217	6.80813	6.55736	7.05125	6.82242	7.44141	7.00567	6.47753	7.44123	6.6155	6.57435	6.7464	6.39705	6.25504	5.12481	4.70867	7.04748	6.6608	6.75003	7.59524	7.43093	8.01759
Cmas	7.69743	7.56156	7.80908	7.715	7.46121	7.33323	7.55655	7.7154	7.27449	7.86278	8.47197	8.08828	8.16564	8.68283	8.00551	8.32645	7.4347	8.49172	8.51544	7.79934	7.62961	7.94442
Cmbl	4.79425	4.68736	4.74052	5.38623	4.82208	5.09449	4.64656	4.95397	5.29211	5.15175	3.87442	4.43187	3.87746	4.29919	3.91162	3.87373	3.87479	3.99347	4.29641	3.88184	3.89	3.89062
Cmc1	7.1979	6.78113	7.13957	7.02703	6.72231	6.50169	6.73319	7.3376	6.64551	7.31297	7.14203	7.01091	7.45264	6.76394	7.88561	6.86426	6.98446	7.08087	6.7143	8.18209	7.80293	7.11528
Cmc2	7.67928	7.74719	7.57675	8.46714	8.21582	8.17354	7.96571	7.90221	7.9028	7.40647	6.50765	7.92323	6.53224	8.02999	7.82373	7.04184	7.8307	7.46245	8.04681	8.16726	8.72005	8.55445
Cmc4	4.61114	4.73162	4.84699	4.88448	4.84894	5.01231	4.95781	4.85225	5.01058	5.3573	5.30366	5.55432	4.98803	4.95097	5.52871	5.47176	5.04737	5.61511	5.48795	5.24509	4.54285	5.11795
Cmip	6.60055	6.70092	5.89435	6.44558	6.92338	6.38101	6.61195	6.03953	7.03287	6.53314	6.83849	6.74632	6.8832	6.15196	5.99538	6.49216	6.1888	6.15136	6.65322	6.44674	6.74803	7.05822
Cml1	3.41157	3.17212	3.17074	3.32726	3.17336	3.49076	3.40859	3.17209	3.52312	3.52794	3.17029	3.70378	3.54156	3.16919	3.79014	3.32426	3.17039	3.32603	3.17024	3.67182	3.67468	3.66242
Cmpk1	9.58464	9.4322	9.84796	9.69726	9.53119	9.3398	9.76806	8.96581	8.75883	10.4757	9.44697	9.98955	9.98141	10.4721	11.1585	9.47798	10.5426	11.1842	9.9612	11.8502	11.4218	10.5334
Cmpk2	6.42878	5.27498	5.92364	6.03722	5.12245	5.13573	5.65955	6.41214	5.22825	5.73518	4.43727	5.80949	5.23873	5.01587	5.67469	4.9964	4.43795	4.92658	5.78037	5.98324	4.46588	5.06176
Cmss1	7.56888	7.64553	7.23125	7.65632	7.8016	7.61484	7.63419	7.59554	7.21092	7.53349	6.96149	6.81451	7.7772	7.66136	7.11233	7.30095	7.99591	7.52436	7.99743	7.75186	7.26005	7.73766
Cmtm3	10.8935	10.666	10.6631	10.4554	10.1583	10.1966	10.2737	10.6091	10.4417	10.3025	9.63965	8.7098	7.67843	9.54927	8.75506	8.9397	8.78579	8.19651	9.17642	7.85487	9.31786	9.19359
Cmtm4	4.64096	4.2089	4.76502	5.13272	5.06655	5.01341	4.40174	4.54898	4.2122	4.93961	5.46185	5.45559	5.52732	4.73875	5.23272	4.20118	4.95094	4.83812	4.50646	5.42588	5.13912	4.2185
Cmtm6	6.93595	8.94627	8.53281	8.07888	7.51243	8.21965	8.07714	8.36511	8.54166	8.1824	8.81009	8.35306	8.35975	8.64647	7.69458	8.34214	8.33438	8.34155	7.67526	8.4108	8.68227	8.53594
Cmtm7	7.80883	8.6534	8.58013	8.40308	8.58302	7.85828	8.27524	8.65056	8.28548	8.34915	8.08152	8.66246	7.92426	8.27771	6.95881	8.12079	9.51958	8.91782	9.05445	9.86239	10.7167	9.59806
Cmtm8	8.802	8.67035	8.89721	8.41511	8.65064	8.86805	8.43448	8.96095	8.44184	8.31459	8.95079	8.83283	8.80505	8.04609	7.72117	7.1378	6.89804	7.3699	7.81017	6.23328	6.31162	5.65134
Cmtr2	5.56329	5.50464	5.76447	6.1258	5.29068	4.63383	5.55668	5.66521	5.5287	6.2732	4.96649	4.69709	5.82165	5.29546	5.68745	5.66389	6.17433	5.48683	5.5451	4.95614	5.94511	5.93447
Cnbp	13.0546	13.1272	13.0645	13.8605	13.5648	13.9518	13.6867	13.1979	13.151	13.3031	12.6333	12.2461	12.2883	13.5536	13.3503	12.8481	13.8725	14.1094	13.9987	13.6976	13.2929	13.16
Cndp2	8.91986	8.32661	8.60898	8.73707	8.25765	8.78437	8.80553	8.57801	8.03163	8.52814	8.28261	7.8916	8.10108	7.91883	7.94884	7.97841	7.925	8.01555	8.03777	8.11716	9.43102	9.52141
Cnep1r1	8.35003	7.73001	7.86665	8.26628	7.89949	7.80141	8.00715	7.90942	8.63177	8.11824	8.41801	8.76562	7.83132	8.60323	9.11571	8.19097	7.9049	8.09909	8.40815	7.69343	8.00644	8.38566
Cnih1	10.3334	10.2572	10.6239	10.561	10.4162	10.1271	10.4026	10.4293	10.5141	10.6714	10.6112	10.8299	10.212	10.685	10.7896	10.9892	10.3961	10.8343	10.5273	10.4034	10.0963	9.93502
Cnih3	3.12212	2.95942	3.37311	3.28566	2.96057	3.61256	3.33105	3.48833	3.31854	2.96035	3.47256	2.95761	2.95848	2.95673	3.45124	3.36025	2.95783	2.95716	3.15166	2.95957	2.96161	2.96177
Cnih4	9.45918	9.39975	9.7634	10.0633	9.83426	10.1801	9.69245	9.69668	9.44715	9.43766	9.31549	10.0801	9.06849	10.1836	9.57743	9.3667	9.54637	9.58075	9.82517	10.211	9.96091	9.88302
Cnksr3	3.77047	4.17216	3.76352	4.37522	4.3375	3.76528	3.85975	4.1342	3.8888	4.57309	3.78421	4.36707	4.69637	4.45792	4.00573	4.66625	4.10361	4.39994	4.24109	3.76641	4.37431	3.80917
Cnn2	11.6818	11.6425	11.7049	10.7825	11.2802	10.7996	11.0555	11.5139	11.73	11.0467	10.9964	11.1499	10.8928	10.6919	9.91667	10.6479	10.6245	10.5252	10.4326	9.32442	9.53877	10.3447
Cnn3	12.9865	12.6741	12.7618	12.6811	12.5072	12.9593	12.5863	12.2389	12.081	12.2977	12.555	12.1643	12.1629	12.7321	12.1497	12.4716	11.2043	11.4097	12.2939	10.7311	10.0316	9.70426
Cnnm2	3.93253	5.02395	4.28642	3.84131	4.62169	3.73328	4.01905	3.77467	4.00708	3.73861	5.50094	4.49072	5.43616	3.83957	4.50756	4.9313	4.05861	4.14293	3.72798	4.19915	3.97503	3.979
Cnnm3	5.81813	5.20717	5.36345	5.60355	5.57749	5.57905	4.82968	6.29149	6.6609	5.78067	5.7365	4.60592	5.84081	5.93721	5.80814	5.08352	5.20212	5.47815	5.88435	5.06209	6.2141	5.33534
Cnnm4	6.34449	6.19466	5.41395	6.13618	5.97522	7.20383	5.25732	5.38479	6.38272	6.37654	6.60793	6.24818	6.48257	5.46517	5.47112	5.71287	6.57636	6.72907	6.2112	6.05385	6.75246	6.52709
Cnot1	8.79676	8.95836	9.23587	9.24817	9.30632	9.12402	9.13996	9.45952	9.09174	8.81473	8.96108	9.29559	9.8893	9.404	8.90794	9.06171	9.14027	8.86218	8.93565	9.40002	8.70884	9.04205
Cnot2	9.5903	9.61242	9.66799	8.87176	9.37303	9.40841	8.93954	9.39616	9.42387	9.37618	9.19996	9.66271	9.74175	9.20206	10.1757	9.60804	9.51444	9.56048	9.48828	9.75374	9.48177	9.64946
Cnot3	6.32812	6.36572	6.79871	5.82527	6.06226	5.65319	5.92678	6.51631	6.22563	6.37344	6.29902	5.95229	6.24265	5.74799	5.63013	6.19462	6.4265	6.28364	5.51678	5.91835	6.27614	5.66708
Cnot4	7.7428	8.48326	8.06835	8.54399	7.87607	7.9604	7.57002	8.12074	8.23912	8.41678	8.34852	8.89461	8.72012	8.42458	8.68195	8.66196	8.2778	8.08891	8.19458	8.37679	8.63153	8.40103
Cnot6	9.11331	9.26765	9.16856	9.7176	9.56966	9.47296	9.89223	8.95368	9.54375	9.90137	10.2496	10.3289	10.4174	10.378	10.5876	10.5448	9.23774	9.6375	9.52544	9.51853	9.45701	8.86911
Cnot6l	8.4223	8.63487	8.06252	8.07618	8.01639	8.54408	8.2919	7.91792	7.35632	8.3544	8.8659	8.55698	9.12244	9.30795	8.87531	8.97958	7.91591	9.04361	8.6272	8.74217	8.82975	8.46789
Cnot7	9.34798	9.577	9.65777	9.28291	9.18896	9.67413	9.60571	9.00771	8.91436	10.2214	10.0942	10.3067	10.3177	10.4131	10.2621	10.3614	9.81257	10.3649	10.0915	9.9379	10.3993	9.15174
Cnot8	9.42777	9.54924	9.54672	9.15535	8.92188	9.51034	8.99644	9.18732	9.23813	9.25568	9.193	9.15315	9.39268	9.07561	9.091	9.28042	9.37496	9.26767	9.18394	9.17556	9.00061	9.19977
Cnot10	8.37355	8.66176	8.0041	8.27978	7.81857	8.67575	8.07552	8.68915	8.06753	8.46919	8.31321	8.01901	7.80924	7.41005	8.08268	8.57639	8.80468	8.3609	7.94739	7.92755	8.01643	8.46043
Cnot11	5.60566	5.45236	6.2421	6.32988	5.78439	5.89568	6.36831	6.10027	6.08725	5.73506	6.12056	6.13428	6.68604	5.19839	5.69684	4.70961	5.67189	5.92461	6.22424	6.46759	6.28136	5.08016
Cnp	5.87909	5.74806	4.72518	5.84686	5.98815	6.16507	6.01476	6.98664	6.07286	6.38151	6.34084	6.24778	6.214	5.66595	6.2179	5.7025	6.92633	6.13556	5.81773	6.60142	7.0625	7.63156
Cnppd1	6.74692	7.13056	7.09931	5.89172	6.26908	6.17534	6.26005	6.69109	6.54676	6.47049	7.10733	6.65594	7.24836	6.4577	6.23284	7.10803	6.76521	6.87247	6.32788	7.26274	6.43807	7.14763
Cnpy2	8.84227	9.25811	9.34612	9.2518	9.42587	9.27244	9.45501	9.46137	8.80665	8.71038	9.44229	9.7616	9.62495	9.28115	9.0247	9.10985	9.10453	9.12795	9.52513	8.64723	8.85357	8.85961
Cnpy3	7.7567	7.623	6.77563	6.94776	7.05101	7.53128	6.68331	7.16667	7.5795	7.37756	7.90318	7.02482	7.50279	5.9805	7.11674	7.30261	8.07352	7.55012	7.20132	6.80126	6.78131	7.86948
[truncated: 8,889 more rows]

## Sheet: Metadata
SampleID	GroupID	Embryonic_timepoint
s1	CD44neg	E11
s2	CD44neg	E11
s3	CD44neg	E11
s4	CD44neg	E9.5
s5	CD44neg	E9.5
s6	CD44neg	E9.5
s7	CD44neg	E9.5
s8	CD44neg	E10
s9	CD44neg	E10
s10	CD44neg	E10
s11	CD44Low_KitNeg	E11
s12	CD44Low_KitNeg	E11
s13	CD44Low_KitNeg	E11
s14	CD44Low_KitNeg	E9.5
s15	CD44Low_KitNeg	E10
s16	CD44Low_KitNeg	E10
s17	CD44Low_KitPos	E10
s18	CD44Low_KitPos	E10
s19	CD44Low_KitPos	E9.5
s20	CD44high	E11
s21	CD44high	E11
s22	CD44high	E11

## Sheet: CD44Neg_Vs_CD44Low_KitNeg
Genename	baseMean	logFC	P_Value	P_Value_Adjusted
S100a4	31.4902	-8.68352	2.32387e-12	3.5588e-10
Clec4e	78.0155	-7.50888	2.16179e-13	4.3528e-11
Ikzf1	144.954	-7.21532	5.57247e-10	4.39054e-08
Gria3	44.2404	-7.2114	6.16924e-14	1.4272e-11
Stk26	68.4707	-6.99029	1.84015e-06	4.29355e-05
Dok2	173.422	-6.78637	9.93011e-12	1.24104e-09
N4bp2l1	30.4701	-6.65435	9.22917e-09	4.77851e-07
Atp2a3	40.4106	-6.53095	2.33022e-09	1.57133e-07
Eln	79.4374	-6.38523	4.93081e-07	1.39616e-05
Htra1	294.122	-6.36268	1.62848e-11	1.94577e-09
Gucy1a3	59.8559	-6.05191	0.00017733	0.00183106
Efemp1	108.826	-5.97819	0.000459621	0.00400117
Nupr1	114.988	-5.97609	9.54739e-08	3.40357e-06
Gpr84	21.7668	-5.93385	1.28947e-06	3.15775e-05
Syt15	66.0318	-5.65364	3.56786e-05	0.000490435
P4ha3	171.197	-5.56781	0.000118419	0.00132603
Mctp1	123.258	-5.3953	4.52005e-07	1.31057e-05
Rhof	27.9844	-5.30237	2.24259e-06	5.04839e-05
Irf6	80.3743	-5.30082	5.39174e-08	2.08628e-06
Cytl1	41.4023	-5.22419	1.18288e-05	0.000197565
Pak7	21.1416	-5.16464	0.000447809	0.00391086
Met	136.215	-5.16352	3.21745e-05	0.000449079
Dsp	36.4765	-5.10949	6.03948e-06	0.00011206
Anpep	22.3391	-5.0751	5.17065e-07	1.44155e-05
Rragd	24.4542	-5.01509	6.28691e-05	0.000788741
Lrrc16a	25.6561	-5.00468	5.5828e-06	0.000105202
Syne4	17.5379	-4.99945	8.02371e-07	2.10221e-05
Nfix	19.167	-4.80783	5.86533e-08	2.24555e-06
Actc1	130.058	-4.79776	0.00132399	0.00917209
Slc8a1	98.5494	-4.79199	4.89416e-08	1.92109e-06
Hlf	59.2048	-4.7716	0.000973168	0.00721535
Col4a5	88.5274	-4.76682	4.80621e-08	1.90029e-06
Tnfrsf23	50.1686	-4.75983	5.11964e-07	1.4345e-05
Akr1c14	375.918	-4.70742	1.81081e-05	0.000283294
5930403L14Rik	59.7989	-4.69684	1.60598e-05	0.000257549
Bmper	63.5843	-4.69544	0.000776768	0.00602841
Spi1	299.141	-4.65667	2.15355e-05	0.000326577
Stat4	123.565	-4.59451	0.000265961	0.00257049
Lrrc9	22.3709	-4.58847	0.00080793	0.00620383
Mfsd2b	64.5077	-4.57059	8.17534e-06	0.000145246
Ms4a6d	168.065	-4.55271	4.6041e-05	0.000603864
F10	79.8886	-4.52004	2.59653e-08	1.12755e-06
Gp1ba	33.1494	-4.51066	9.27296e-06	0.000160757
Grik5	14.3606	-4.49326	1.48143e-08	6.97297e-07
Pdzk1ip1	38.0778	-4.43154	0.000415931	0.00369478
Pde3a	59.6967	-4.39061	1.17242e-05	0.000197029
Sult1a1	53.4775	-4.33076	9.42877e-07	2.38972e-05
Ikzf2	145.631	-4.31167	9.36795e-09	4.80425e-07
Plek2	38.9015	-4.27911	0.000250173	0.00244617
Mr1	49.6853	-4.27092	0.000213757	0.00214711
Dkk2	199.372	-4.23632	0.000982252	0.00724989
Hey2	293.084	-4.21542	0.00012592	0.00138857
Nfe2	162.378	-4.12974	3.49536e-05	0.000482298
Adamts3	38.6423	-4.09698	0.000779102	0.0060379
Kcnn4	47.0414	-4.05165	4.70562e-06	9.18568e-05
Serpinb8	41.8657	-4.02487	2.17504e-05	0.000328461
Gcnt1	106.592	-3.93682	8.62979e-07	2.23409e-05
Wipf3	43.1031	-3.92178	0.000320528	0.0029937
Rps6ka5	137.152	-3.89987	2.15984e-11	2.44624e-09
Ltbp1	314.41	-3.89867	3.633e-12	5.33806e-10
Ddb2	19.6915	-3.88115	9.43115e-05	0.00109909
Bmx	409.124	-3.85537	1.14621e-05	0.00019322
AI467606	68.4568	-3.83826	0.000127684	0.00140517
Alox12	174.412	-3.81611	0.000748586	0.00585566
Bcam	30.4965	-3.81547	0.000140623	0.00151385
Fbn1	1164.71	-3.81535	1.51251e-09	1.061e-07
Ltbp4	472.937	-3.80694	3.36606e-06	7.00089e-05
Naip5	73.7639	-3.8013	0.000157797	0.00166576
Dcaf12l1	72.9914	-3.78371	0.000220692	0.00220145
Adgrg1	392.301	-3.7769	2.00982e-06	4.61029e-05
Was	49.7034	-3.74311	0.000652106	0.00527555
Sdpr	857.294	-3.69505	0.000381893	0.00346027
Synpo	164.87	-3.67787	2.83849e-05	0.000413157
Hacd4	265.649	-3.64625	9.75837e-14	2.12206e-11
Vwf	1376.14	-3.64609	1.24934e-11	1.5263e-09
Xk	67.0975	-3.62309	0.00013315	0.00145501
Bcl11a	248.713	-3.5372	1.00547e-16	4.96928e-14
Frk	134.168	-3.53702	4.863e-07	1.38056e-05
Lama3	252.299	-3.49442	1.43694e-08	6.82263e-07
Dock10	55.7765	-3.48425	0.00138613	0.00948264
Ankrd29	125.871	-3.48398	5.93616e-08	2.2647e-06
Fas	189.194	-3.45052	9.38512e-05	0.00109607
Gpm6b	237.819	-3.43989	0.000261935	0.00254061
C530008M17Rik	137.976	-3.42929	4.66337e-07	1.3414e-05
Sp110	61.4328	-3.405	1.83748e-06	4.29355e-05
Crispld1	92.615	-3.39927	5.72597e-05	0.000730733
Gm20939	76.303	-3.39812	0.000218494	0.00218925
Tmem221	46.9877	-3.39377	0.000618708	0.00507332
Adgrg6	196.286	-3.37374	4.65103e-09	2.71885e-07
Prickle2	61.133	-3.37316	0.00127311	0.00891917
Tnfrsf26	153.397	-3.36688	0.000232559	0.00230519
Smtnl2	134.35	-3.3646	4.14574e-05	0.000557879
Tmem100	1402.71	-3.307	0.000595183	0.00492874
Itga4	262.054	-3.29351	5.25503e-05	0.000675389
Jag1	1544.59	-3.27629	9.18382e-07	2.34403e-05
Egfl8	46.2899	-3.274	0.000224939	0.00223977
Tm4sf1	1022.28	-3.26015	6.03839e-14	1.4272e-11
Pcsk5	411.07	-3.25282	9.62212e-06	0.000165802
Mllt3	249.955	-3.24355	5.01979e-13	8.94757e-11
Smad6	132.729	-3.20149	3.48886e-08	1.44237e-06
AU021092	288.99	-3.20018	3.69344e-11	3.79333e-09
Emb	1983.16	-3.19974	1.01179e-24	3.66706e-21
Dhh	77.39	-3.19289	0.000171953	0.00177892
Ctsc	1213.6	-3.17447	6.11401e-10	4.78257e-08
Cd44	837.536	-3.17025	2.56996e-16	1.11773e-13
Srgn	911.486	-3.16108	1.43448e-06	3.45069e-05
Procr	279.009	-3.15879	1.17945e-10	1.10553e-08
Nkx2-3	91.1602	-3.15292	1.40949e-05	0.000229422
Crebrf	43.2301	-3.13591	0.000142989	0.00153326
Pla2g4a	507.622	-3.11623	0.000916757	0.00688391
Dmd	178.298	-3.11459	3.96554e-15	1.35225e-12
Capn5	29.8045	-3.11178	0.000978777	0.00723962
Vegfa	53.1898	-3.11164	2.08269e-05	0.000317158
Pdlim1	412.323	-3.10195	8.80766e-17	4.56027e-14
Krt18	141.693	-3.09504	0.0012685	0.0088926
Neurl3	227.616	-3.06906	0.000415451	0.00369354
Smpdl3a	341.003	-3.06193	2.54779e-09	1.68082e-07
Fjx1	32.2991	-3.05841	9.26641e-05	0.00108805
Ocln	219.397	-3.04734	4.31282e-10	3.55253e-08
Lama5	129.149	-3.04658	2.17188e-09	1.48521e-07
Fermt3	232.178	-3.03026	0.000437272	0.003849
Slfn2	132.865	-3.02201	0.000161851	0.00170106
Slc18a2	1032.32	-3.0214	2.78025e-14	7.19753e-12
Mtap7d3	28.9576	-3.02013	0.000945567	0.00705639
Enpp4	105.707	-3.00757	3.12215e-05	0.000439161
Neto2	98.3092	-3.00747	3.26361e-05	0.000454357
BC064078	48.1342	-2.9731	6.8086e-05	0.000839341
Ctsh	1157.1	-2.89116	2.60217e-07	8.15371e-06
Bmpr1a	156.613	-2.86978	0.000183417	0.00187964
Alpk3	35.214	-2.86666	0.000230778	0.00229156
Ptgis	157.335	-2.83815	3.91115e-10	3.27123e-08
Fgd4	109.565	-2.83087	5.10512e-05	0.000660023
Gbp7	118.948	-2.82862	3.00038e-05	0.000430384
Slc16a4	51.112	-2.82137	1.40103e-06	3.39273e-05
Plcg2	282.967	-2.81262	9.29729e-05	0.0010905
Ssfa2	560.039	-2.77984	6.07621e-19	6.60666e-16
Fam84b	149.755	-2.77557	4.04921e-06	8.214e-05
Tmem176b	676.747	-2.77271	3.05592e-11	3.2898e-09
Nipal2	71.1402	-2.77205	0.00072495	0.00572431
Calcrl	4000	-2.73996	6.54019e-31	7.11115e-27
Notch3	66.0176	-2.73781	8.61422e-05	0.00102587
Timp2	113.241	-2.71807	9.57636e-09	4.8656e-07
Sncaip	59.2717	-2.71678	0.00118077	0.00840765
Fn1	5461.12	-2.69807	1.39865e-21	2.53458e-18
Hs3st1	144.621	-2.66796	2.62631e-07	8.2057e-06
Zfp97	44.2049	-2.66387	0.000488415	0.00420991
Gata6	94.6362	-2.65707	2.46924e-05	0.000368286
Unc13b	66.396	-2.65604	0.000815428	0.00623937
Trim34a	87.8419	-2.63166	6.51974e-05	0.000809237
Mecom	936.303	-2.62857	1.59751e-19	2.09437e-16
Slc9a3r1	146.838	-2.6047	4.93849e-08	1.93152e-06
Meis1	205.659	-2.60156	1.15193e-08	5.64188e-07
Sost	36.2997	-2.59873	4.15229e-05	0.00055807
Igsf3	209.117	-2.59575	1.37094e-14	3.82212e-12
Col5a2	719.681	-2.59054	1.869e-08	8.57454e-07
Gja5	913.328	-2.58444	6.49018e-06	0.000119606
Il15	159.347	-2.58128	5.98249e-08	2.26647e-06
Nfat5	370.904	-2.57705	2.56467e-09	1.68082e-07
Stmn2	625.752	-2.57339	0.000130044	0.00142681
Aes	132.014	-2.56538	4.28224e-12	6.20811e-10
Thsd7a	108.175	-2.54812	0.00061729	0.00506933
Serpinf1	1014.53	-2.5471	8.72751e-16	3.27221e-13
Pld1	284.424	-2.54208	1.72256e-09	1.18541e-07
Fam181b	68.124	-2.53975	0.000407955	0.00364179
Senp7	168.615	-2.52784	4.67953e-13	8.4801e-11
Ptchd1	450.798	-2.5163	3.35231e-11	3.57349e-09
Zbtb4	42.124	-2.48926	0.000689817	0.00552718
Cdk14	149.938	-2.48156	1.60443e-07	5.34744e-06
Pde3b	217.807	-2.47823	8.40961e-08	3.04072e-06
Pdcd4	392.816	-2.47583	7.9299e-19	7.83835e-16
Zfp667	106.658	-2.47251	0.000367202	0.00335512
Lpin1	48.3564	-2.46954	0.000600662	0.00495523
Fam198b	807.059	-2.46456	1.63079e-05	0.000260758
Tmx4	286.305	-2.46405	4.20704e-14	1.03962e-11
Scai	222.644	-2.4508	1.26055e-06	3.10793e-05
Prkcd	149.825	-2.44488	0.000696723	0.0055743
Snhg14	100.994	-2.43486	0.000829851	0.00633191
Kank1	127.818	-2.43086	0.000901863	0.00679547
Acer2	421.144	-2.41151	2.50478e-08	1.10261e-06
Nadk2	279.612	-2.40872	3.55622e-11	3.71796e-09
Klhl13	501.813	-2.39845	6.99019e-10	5.31499e-08
Pde9a	125.059	-2.39631	2.99297e-06	6.39344e-05
Laptm5	602.276	-2.37201	9.14553e-12	1.15627e-09
Prdm16	89.3735	-2.37089	2.83057e-05	0.000413112
Gm4944	130.597	-2.36883	0.000592448	0.00490982
Stk38l	110.783	-2.3669	1.98815e-08	9.00716e-07
Tspan8	183.964	-2.35916	3.56567e-07	1.07098e-05
Camk2d	353.427	-2.33083	8.24671e-11	8.07807e-09
Meis2	222.728	-2.32867	0.000208882	0.00210294
Yy2	191.995	-2.32824	1.31198e-05	0.00021516
Pmepa1	153.45	-2.32262	5.77066e-06	0.000107808
Tox	101.917	-2.29651	4.01915e-07	1.18751e-05
Emp3	398.264	-2.29493	1.55805e-10	1.42358e-08
Phxr4	39.2355	-2.29124	0.000795701	0.0061229
Tapbp	154.356	-2.28608	1.10734e-08	5.52299e-07
Ccdc80	214.702	-2.27042	8.08881e-05	0.000971819
Sp4	133.354	-2.26952	0.000881941	0.00666853
Dst	205.767	-2.26673	6.1166e-08	2.30124e-06
Trim47	246.923	-2.23755	4.39684e-09	2.58415e-07
Mir99ahg	147.563	-2.23137	6.86162e-05	0.000844919
Itm2a	1620.44	-2.19513	3.06583e-08	1.29205e-06
Slc25a40	117.83	-2.19203	1.03865e-05	0.00017701
Firre	97.2089	-2.19102	0.000114347	0.00128972
Synrg	64.7641	-2.17943	0.00118347	0.00841584
Nfkbiz	99.8421	-2.17886	0.000446677	0.00390621
Mum1l1	372.42	-2.17809	5.76398e-05	0.000734722
Smad7	149.315	-2.1771	1.52314e-06	3.63182e-05
Asah2	66.708	-2.17652	0.00015796	0.00166586
Mfap2	864.178	-2.17638	0.000436612	0.003849
Fam101b	57.5186	-2.17385	0.000232823	0.00230519
Mgst3	210.846	-2.14937	5.00122e-10	3.99841e-08
Khdrbs3	81.2357	-2.14678	0.000397752	0.00356338
Diaph2	148.204	-2.14451	1.8018e-07	5.91871e-06
Xpr1	164.634	-2.14143	6.54292e-06	0.000120171
Smim3	157.93	-2.13753	0.000125071	0.00138341
Sat1	5123.14	-2.12888	1.9024e-11	2.2005e-09
Tob1	62.862	-2.12535	1.65733e-05	0.000263453
Ccpg1	169.851	-2.11942	6.46316e-07	1.73516e-05
Dnajb9	936.619	-2.11354	6.42092e-14	1.45447e-11
Ghr	279.168	-2.10928	6.865e-06	0.000125451
2610008E11Rik	313.26	-2.07396	2.43298e-06	5.39874e-05
Cdk19	171.392	-2.06782	0.000192819	0.00195936
Cpq	153.726	-2.06576	1.71072e-05	0.000269967
Gja4	3221.44	-2.06359	8.37833e-05	0.00100438
Mylip	138.681	-2.05609	3.42218e-07	1.03647e-05
Insr	194.462	-2.0556	7.15045e-09	3.92661e-07
Tanc2	132.56	-2.05469	0.000120705	0.0013447
Cyp26b1	210.538	-2.04639	9.09862e-07	2.33829e-05
Fndc3b	354.429	-2.03568	1.23919e-08	5.96184e-07
Zfp697	43.6185	-2.02276	0.000238165	0.00234988
Mall	161.247	-2.01537	2.32275e-05	0.000348348
Tmem176a	285.634	-2.00943	0.000113795	0.00128483
Frs2	89.4118	-2.00507	0.000427332	0.00378062
Fry	98.6613	-1.99904	2.16529e-05	0.0003279
Ypel3	85.39	-1.99816	3.48452e-05	0.000481413
Mansc1	101.119	-1.99478	0.000281243	0.00269899
Hs6st1	65.7792	-1.99078	2.79905e-05	0.000410163
Zfp60	104.397	-1.98743	0.000986085	0.00726895
Atp13a2	192.69	-1.97553	1.48961e-07	4.99893e-06
Malat1	31428.6	-1.96516	2.86556e-17	1.73096e-14
AW146154	108.49	-1.95852	0.000801365	0.00615777
Palld	371.193	-1.95782	6.55757e-15	2.03716e-12
Pla2g12a	103.819	-1.95047	0.000536001	0.00452202
Zfp942	279.353	-1.95023	0.000130448	0.00142836
Gclm	214.568	-1.9492	3.96758e-06	8.07857e-05
Fut8	502.613	-1.94713	9.41144e-09	4.80425e-07
Ifitm3	909.419	-1.93937	1.09106e-15	3.95435e-13
Pdgfd	170.476	-1.92878	8.21452e-07	2.14703e-05
Zbtb18	78.731	-1.92429	0.000400545	0.00358446
Zxda	55.1161	-1.92289	0.00125007	0.00879172
Slit2	147.276	-1.9156	0.000209967	0.00211191
Ccng2	250.633	-1.91559	4.25861e-06	8.54316e-05
Fam160a2	141.241	-1.91502	1.37853e-09	9.79659e-08
Sh3d19	133.125	-1.91097	3.54507e-06	7.28649e-05
Pik3r3	207.981	-1.90902	3.20326e-06	6.7165e-05
Ppp3cb	253.926	-1.90516	1.63954e-08	7.61827e-07
Atp8a1	86.2457	-1.90435	0.00100796	0.00737403
Clec14a	1918.16	-1.89991	2.42102e-08	1.07007e-06
Erlec1	253.085	-1.89569	3.17694e-06	6.70201e-05
Hey1	799.294	-1.89171	1.63725e-05	0.000261407
Micu3	198.704	-1.88741	2.05984e-08	9.2548e-07
Ptprb	1179.85	-1.88601	1.26438e-06	3.11032e-05
Trim24	213.294	-1.88502	3.50208e-09	2.19175e-07
Fzd3	168.644	-1.8814	9.93606e-05	0.00114931
Zfp958	253.452	-1.86779	8.48154e-06	0.000149708
Fosl2	66.3328	-1.86597	0.000290187	0.00276773
Itpr3	192.668	-1.86571	0.000620406	0.0050834
Tspan2	446.237	-1.86524	1.57837e-05	0.00025387
Prrg1	296.365	-1.86455	1.24914e-06	3.08679e-05
Agrn	513.192	-1.85045	3.47705e-06	7.20114e-05
Ralgapa1	412.786	-1.84855	9.98597e-14	2.12897e-11
Vegfc	484.726	-1.84779	8.55656e-08	3.08065e-06
Chic2	153.906	-1.83849	4.6815e-06	9.17152e-05
Crim1	82.0057	-1.83775	0.000991747	0.00729585
Fnip1	164.153	-1.83618	2.85542e-05	0.000414512
Gstt2	49.3245	-1.83374	0.000974478	0.00721765
Fstl1	3568.04	-1.83033	3.79202e-07	1.12961e-05
Azin1	1674.36	-1.82325	4.52344e-15	1.49041e-12
Stxbp2	288.727	-1.82272	2.08027e-05	0.000317158
Bex1	356.46	-1.81805	6.91908e-06	0.000126227
Slc45a4	91.7213	-1.81787	0.000490933	0.00422303
Cbfa2t3	229.828	-1.81595	1.55821e-14	4.13231e-12
Twsg1	181.504	-1.81497	0.000170405	0.00176796
Klhl5	162.347	-1.8142	1.5126e-05	0.000245105
Klf11	68.7787	-1.80907	0.000445547	0.00390051
Mex3c	256.11	-1.80502	6.29658e-05	0.000788741
Uvssa	198.037	-1.80416	5.27977e-06	0.000100891
Cbx6	44.3354	-1.80179	0.0013674	0.00937438
Ppp2r3a	156.393	-1.79495	4.60048e-06	9.07823e-05
Pam	812.351	-1.79263	3.96825e-09	2.39704e-07
Hoxa9	378.551	-1.79222	5.18523e-06	9.96096e-05
Gata3	189.425	-1.7844	0.000462852	0.00402607
Furin	99.2523	-1.77961	2.55789e-07	8.07328e-06
Cd55	170.895	-1.77465	0.00068413	0.00549376
Sdc1	196.613	-1.77432	6.26556e-05	0.000787594
Bpgm	196.803	-1.7743	7.52588e-06	0.000136155
B630005N14Rik	157.117	-1.77311	0.000721109	0.0057036
Cd2ap	409.381	-1.76961	1.76316e-12	2.90467e-10
Nab1	285.001	-1.76338	4.12294e-06	8.31312e-05
Rhoq	98.251	-1.75559	3.34112e-05	0.000463368
Mospd2	329.963	-1.75255	1.02827e-06	2.58207e-05
Amigo2	164.803	-1.75026	0.000523092	0.00443485
Dtx3l	105.271	-1.74845	0.000606194	0.00498533
Kansl1l	86.06	-1.72902	8.13766e-06	0.000144813
Fam174a	344.867	-1.72362	8.55032e-07	2.2188e-05
Zeb2	285.779	-1.71944	1.40618e-06	3.39765e-05
Abr	63.0337	-1.70898	0.00122074	0.00859656
Fchsd2	221.691	-1.69284	2.85009e-06	6.12431e-05
Pkd2	192.367	-1.68603	0.000480162	0.00415669
Adipor2	213.357	-1.68531	2.18895e-06	4.98961e-05
Gata2	203.262	-1.68321	2.04672e-06	4.68505e-05
Rnf149	238.397	-1.68017	1.33796e-08	6.40867e-07
Plod1	726.684	-1.6793	2.33694e-06	5.22831e-05
Dynlt3	673.517	-1.67832	1.19658e-08	5.79974e-07
Ptpre	119.91	-1.67711	8.49514e-05	0.00101391
Elf1	247.989	-1.66592	8.11681e-06	0.000144679
Sox13	100.908	-1.66434	0.000245727	0.00240918
Nptn	683.793	-1.66424	3.46306e-08	1.44237e-06
Zfp944	193.283	-1.66049	4.7972e-05	0.00062617
Pik3cg	106.489	-1.65519	0.000141438	0.00152112
Ttpa	527.79	-1.64842	2.13254e-05	0.000323842
Tead1	97.972	-1.64527	0.00102134	0.00744305
Alox5ap	401.386	-1.64398	9.56728e-05	0.00111257
Lipa	744.035	-1.64229	3.89813e-09	2.37579e-07
Ppm1b	148.627	-1.64111	8.88471e-06	0.000154565
Tet2	217.71	-1.64051	7.63733e-08	2.81494e-06
Atxn1	98.0856	-1.63983	9.50404e-06	0.000164176
Kcnq1ot1	1232.88	-1.63877	6.34719e-09	3.53913e-07
App	1010.6	-1.62766	1.26582e-10	1.16638e-08
Ctsl	2837.24	-1.62696	5.63594e-12	7.47311e-10
Slc35d2	157.556	-1.62597	4.39682e-06	8.73827e-05
S100a11	548.659	-1.62034	5.01681e-08	1.95512e-06
Ncoa2	162.453	-1.61626	8.51016e-06	0.000149813
Zfp606	185.899	-1.61425	0.000152962	0.00162576
Pcmtd1	294.191	-1.61409	0.000287017	0.00274329
Ctso	245.775	-1.61026	0.000118592	0.0013266
Tmem2	1041.94	-1.60868	1.47894e-06	3.54196e-05
Serf1	326.344	-1.60487	6.00362e-08	2.26658e-06
Ginm1	515.34	-1.59902	5.21843e-17	2.837e-14
Ecm1	984.791	-1.589	2.34959e-06	5.2458e-05
Med14	180.221	-1.58318	2.88717e-05	0.000417449
Fgfr1	311.632	-1.58013	6.23363e-06	0.000115269
Atp13a3	478.992	-1.57796	4.65103e-06	9.12828e-05
Fam69a	427.499	-1.57437	9.07366e-12	1.15627e-09
Shprh	238.004	-1.57346	0.000379079	0.00344338
Upf3b	402.449	-1.57201	3.67576e-05	0.000503052
Tank	353.357	-1.57104	9.63198e-08	3.4225e-06
Fam208a	340.013	-1.56871	1.22949e-05	0.000204407
Cdh5	2433.24	-1.56781	3.39024e-08	1.42325e-06
Apc	382.588	-1.56454	4.64926e-06	9.12828e-05
Pnrc1	218.639	-1.56441	4.35213e-05	0.00057991
B2m	5281.63	-1.56435	3.05694e-12	4.55316e-10
Taf4a	109.859	-1.56299	0.000952222	0.00708659
Fndc3a	387.936	-1.56172	3.82758e-07	1.13708e-05
Jak2	132.562	-1.55971	0.000153316	0.00162635
Plxna2	183.209	-1.55854	5.65502e-06	0.000106195
Aff4	396.469	-1.55618	5.49438e-07	1.51242e-05
Cd63	937.142	-1.55413	1.39193e-12	2.36476e-10
Gm14325	122.847	-1.55319	6.4354e-05	0.000802432
Xist	2541.59	-1.55242	0.00106457	0.00770133
Arid4b	641.002	-1.54823	3.77368e-09	2.31815e-07
H19	4701.2	-1.54166	2.31746e-06	5.20614e-05
2610044O15Rik8	120.624	-1.53971	0.000662974	0.00535551
Zfp949	75.975	-1.53534	0.000888398	0.00670802
Fam126b	175.752	-1.53119	2.90643e-06	6.23307e-05
Dcaf6	77.2282	-1.52629	4.39762e-05	0.000584231
D15Ertd621e	414.546	-1.52616	2.19742e-07	7.08978e-06
Fryl	221.586	-1.52356	1.01938e-06	2.56568e-05
Rev3l	237.386	-1.51866	2.86378e-05	0.000415172
Mbnl1	824.786	-1.51358	1.2002e-13	2.50958e-11
Rasa1	614.884	-1.51219	2.3101e-09	1.56986e-07
Tek	2940.26	-1.50913	3.69808e-11	3.79333e-09
Ehd4	649.276	-1.50284	2.28154e-07	7.33941e-06
Ramp2	2858.99	-1.50097	9.28494e-06	0.000160757
Bcr	159.297	-1.5009	2.83693e-05	0.000413157
Vps37a	285.483	-1.49899	3.1995e-06	6.7165e-05
Zfp935	225.441	-1.49814	3.71049e-06	7.5835e-05
Tmeff1	243.028	-1.49809	0.000244865	0.00240706
Zbed6	128.366	-1.49135	0.000490571	0.00422303
Ostm1	166.533	-1.48927	0.00119892	0.00847034
Mir703	307.556	-1.48648	2.40759e-06	5.35331e-05
Tjp1	1159.56	-1.48503	2.99997e-10	2.5684e-08
Kbtbd3	97.9716	-1.48328	4.98975e-05	0.000647417
Sptssa	1801.25	-1.48255	2.8267e-11	3.07347e-09
Rgs2	2756.2	-1.48232	6.81392e-08	2.53725e-06
1810026B05Rik	240.771	-1.47966	2.21943e-06	5.02748e-05
Herc2	394.247	-1.47629	3.43357e-09	2.17054e-07
Bmpr2	785.386	-1.46754	4.73883e-07	1.35384e-05
Phf20l1	482.493	-1.46047	5.33524e-07	1.47234e-05
Sirt1	161.841	-1.45972	0.000565208	0.00471643
Sh2b3	401.871	-1.45716	1.15698e-09	8.33103e-08
Hid1	205.389	-1.45593	0.00125687	0.00882685
Hist1h2bc	167.669	-1.45588	0.00070886	0.00562586
Map4k3	362.404	-1.45409	0.00056632	0.00472208
Ube2g1	1275.98	-1.45266	1.96665e-08	8.9846e-07
Entpd1	748.004	-1.44936	3.29527e-05	0.000457592
Ctnnb1	4476.82	-1.44594	5.54899e-14	1.34076e-11
Gt(ROSA)26Sor	534.189	-1.44178	6.79549e-06	0.00012439
Ranbp9	188.98	-1.44015	0.000278174	0.00267426
Tnfaip8	564.821	-1.43573	3.07643e-07	9.44916e-06
Zmym6	118.954	-1.43385	0.000895145	0.00675427
Arsk	130.337	-1.43255	0.000638467	0.00518945
Kdm4c	120.68	-1.42906	0.000219921	0.00219578
Pik3c2b	368.203	-1.42823	1.59034e-07	5.32055e-06
Zfp120	353.64	-1.42103	0.000276047	0.00265616
Med13	313.166	-1.42093	5.00373e-07	1.41313e-05
Fbxo11	488.652	-1.42068	2.9753e-06	6.3682e-05
Pisd-ps3	183.564	-1.41825	0.000402726	0.00359806
Fam179b	236.419	-1.41468	6.12095e-05	0.000774775
Suco	201.058	-1.41109	1.52038e-05	0.000245998
Prkacb	274.6	-1.40795	0.000646191	0.00523549
Hspa13	349.615	-1.40717	0.000435442	0.00384299
Dennd5a	296.64	-1.40691	4.19938e-05	0.000563702
Oxr1	381.105	-1.40577	7.46904e-06	0.000135352
Npc1	176.528	-1.40344	0.000344974	0.00319498
Tmem87a	151.401	-1.40183	1.34356e-06	3.28051e-05
Rnf111	267.453	-1.39978	7.94871e-06	0.000142618
Golph3l	370.525	-1.3976	8.5151e-06	0.000149813
Trpm7	676.544	-1.3933	6.21426e-07	1.68498e-05
Rab21	86.6104	-1.39236	0.00127591	0.00892725
Rcor1	97.4134	-1.39151	0.000880497	0.00666224
1600012H06Rik	342.836	-1.39123	5.6081e-06	0.000105496
Armcx4	496.877	-1.38928	3.3329e-06	6.95559e-05
Rnf11	153.612	-1.38886	0.000982681	0.00724989
Stxbp5	127.182	-1.38651	0.00030993	0.00291259
Ppp2r5e	211.511	-1.38236	3.59511e-07	1.07685e-05
BC005561	178.485	-1.38106	0.000346145	0.00320154
Pcmtd2	173.097	-1.37959	0.000701952	0.00559876
Lats1	134.136	-1.37944	7.86684e-05	0.000951405
Rif1	847.253	-1.37598	1.70021e-07	5.61897e-06
Akirin2	241.077	-1.37382	3.3888e-11	3.57732e-09
Mkl2	486.27	-1.37298	1.10662e-10	1.04746e-08
Cdyl	133.711	-1.37122	0.0003706	0.00337765
Dzip3	390.075	-1.37057	2.39206e-05	0.000357756
Vps13a	191.757	-1.36811	0.00119872	0.00847034
Gopc	166.819	-1.3638	0.000599588	0.00495013
Atad2b	228.546	-1.36155	2.82826e-05	0.000413112
Dhx57	168.821	-1.35885	9.73364e-05	0.0011295
Eea1	291.395	-1.35579	8.71645e-06	0.000152615
Rtn4	584.027	-1.35511	4.38096e-06	8.72422e-05
Wls	901.875	-1.35214	4.33831e-13	7.99499e-11
Guf1	393.326	-1.35067	1.61052e-05	0.000257896
Zfp445	451.842	-1.34732	2.58427e-05	0.000384389
Skil	1607.93	-1.34468	2.79762e-06	6.03542e-05
Pbx1	295.581	-1.34336	2.63116e-05	0.000390829
Inpp4b	215.965	-1.33776	0.00015944	0.00167984
Hltf	302.922	-1.33636	1.37602e-05	0.000224347
Abi1	837.657	-1.3316	5.78355e-06	0.000107864
Zfp62	489.645	-1.33076	0.000164392	0.00171704
Zfp608	195.809	-1.3291	4.01551e-05	0.000542368
Pcnx	262.439	-1.32712	4.83483e-06	9.40413e-05
Rbm26	737.484	-1.32413	2.78711e-05	0.000410071
Id1	956.981	-1.32144	1.21916e-05	0.000203001
Rfk	584.219	-1.32002	9.11833e-07	2.33829e-05
Slco3a1	306.149	-1.31728	0.000218663	0.00218925
Rb1cc1	372.05	-1.31385	3.49086e-07	1.05434e-05
Zfp69	794.952	-1.31307	1.14718e-07	3.94725e-06
Serinc3	3912.73	-1.31085	1.19878e-10	1.11404e-08
Smarcc2	122.224	-1.30943	3.20141e-05	0.000447415
Commd3	877.523	-1.30902	2.02965e-05	0.000310943
Mbd4	267.247	-1.30774	0.000387766	0.00350515
Fam92a	443.568	-1.30626	3.53683e-07	1.06526e-05
Lztfl1	327.155	-1.30437	0.000260175	0.0025303
Epc2	108.555	-1.30129	0.000936645	0.00699941
Syap1	275.54	-1.29861	5.82189e-06	0.000108393
Tnfrsf22	72.2416	-1.29813	0.00106248	0.00769128
Myct1	789.215	-1.29801	1.16538e-05	0.000196149
Mmrn2	1090.42	-1.29773	5.48146e-05	0.000702002
Ninj1	329.83	-1.29544	5.25459e-06	0.000100643
Filip1l	442.471	-1.29117	0.000134142	0.0014617
Lyl1	560.957	-1.29076	9.93361e-07	2.50599e-05
Tmem181b-ps	118.698	-1.2892	0.000359069	0.00330022
Zhx1	693.56	-1.28879	5.80127e-09	3.30247e-07
Capn7	367.591	-1.28753	0.000267683	0.00258483
Rmnd5a	193.078	-1.28652	0.000947092	0.00706292
Atp7a	520.597	-1.28505	0.0013244	0.00917209
Bmp1	264.651	-1.28387	0.000968933	0.00719127
Smim14	247.433	-1.28068	0.000606602	0.00498533
Mast4	196.576	-1.28024	0.000364306	0.00333706
Fmr1	432.036	-1.27905	0.000320372	0.0029937
Krit1	493.338	-1.27871	8.3644e-07	2.18096e-05
Il2rg	762.159	-1.27659	0.000553404	0.00462858
Mbtd1	313.284	-1.27581	0.000395209	0.00355426
Rab18	1671.68	-1.27359	8.3493e-10	6.26083e-08
Irf2bp2	179.72	-1.27246	3.39738e-05	0.000470569
Kmt2c	265.693	-1.27192	0.000169927	0.00176468
Ypel5	447.984	-1.26172	5.47616e-06	0.000103913
Ankra2	223.565	-1.26049	0.000225529	0.00224353
Rab3gap1	180.293	-1.25746	0.00130461	0.00907151
Tgoln1	216.855	-1.25328	8.8585e-06	0.000154357
Spag9	552.211	-1.24899	6.48218e-10	5.03434e-08
Usp25	239.385	-1.24854	0.000487665	0.00420991
Rcn1	1002.5	-1.24837	7.0956e-07	1.88172e-05
Cpne3	540.79	-1.24624	2.10153e-07	6.84129e-06
Fcho2	733.685	-1.24586	0.000180775	0.00185781
Rock1	880.686	-1.24548	4.75127e-08	1.88542e-06
Gls	624.151	-1.24458	6.15077e-05	0.00077674
Picalm	839.351	-1.24249	3.40993e-07	1.03565e-05
Slain2	171.385	-1.24168	2.87212e-05	0.000415827
Jarid2	315.398	-1.23229	0.0001176	0.00131957
Ifngr1	1053.42	-1.23093	2.88754e-10	2.5117e-08
Smarcad1	557.098	-1.2298	4.07971e-06	8.2463e-05
Pon3	532.112	-1.22814	9.47812e-07	2.39664e-05
Dync2h1	137.561	-1.22808	0.000597089	0.00494076
Rnf139	289.497	-1.22561	9.05816e-05	0.00106916
Baz2b	437.092	-1.22162	4.11697e-07	1.21311e-05
Avpi1	111.65	-1.22129	0.000299435	0.00284098
Scamp1	297.162	-1.21732	0.000147343	0.00157219
Slc35b3	263.98	-1.21558	1.01174e-07	3.54859e-06
Fnbp1l	427.789	-1.2151	0.000535569	0.00452202
Nbeal1	219.509	-1.21115	0.000590503	0.00489744
Adam10	2603.69	-1.20855	6.29281e-09	3.52689e-07
Ppp3ca	385.754	-1.20786	7.14063e-06	0.000129833
Zfp950	359.977	-1.20649	3.53478e-05	0.000487118
Clk1	2702.9	-1.20611	9.05568e-07	2.33323e-05
Luc7l2	223.01	-1.20515	0.00063262	0.00516779
Zfp846	94.7503	-1.20434	0.0012575	0.00882685
Aaed1	112.491	-1.20405	0.000162293	0.00170329
Reck	183.951	-1.19887	0.000660816	0.00534205
Orai1	121.503	-1.19388	0.000560416	0.00468004
Ireb2	546.407	-1.19061	8.5078e-07	2.21305e-05
Lamp2	2162.36	-1.18598	1.27342e-06	3.12547e-05
Neo1	146.911	-1.1855	0.00146208	0.00991718
Pcf11	273.094	-1.18312	9.34714e-05	0.00109399
Ulk2	228.257	-1.18103	0.000663917	0.00535915
Rab3gap2	158.219	-1.17987	0.00025831	0.00251892
Ubr5	517.414	-1.17831	1.65083e-06	3.90206e-05
Rab12	265.2	-1.1783	0.000918237	0.00688467
Utrn	710.254	-1.17638	0.000135913	0.00147631
Tmem68	363.34	-1.17564	6.20602e-05	0.000782808
Man1a	128.422	-1.17419	0.00072981	0.00574904
Pik3c2a	340.231	-1.17179	0.000781597	0.00604861
Zcchc11	329.521	-1.16977	6.40163e-05	0.000799138
Pign	213.089	-1.16908	0.00121403	0.00855482
Cast	448.064	-1.16895	1.44672e-07	4.87003e-06
Zmym2	548.053	-1.1653	8.10533e-06	0.000144679
Tmem59	2885	-1.16337	5.2035e-12	7.25355e-10
St3gal5	270.656	-1.16245	0.000708291	0.00562546
Irf2	151.189	-1.16089	0.000182236	0.00187106
Pdcl	436.004	-1.15839	9.95296e-09	4.98703e-07
Ablim1	278.32	-1.14714	3.28592e-05	0.000456877
Pias2	316.87	-1.14647	4.26073e-05	0.000571232
Pten	241.598	-1.14083	0.000683464	0.00549247
Psip1	621.815	-1.14072	9.02408e-05	0.00106651
Creg1	1022.41	-1.14071	2.57272e-07	8.08472e-06
Npepl1	192.894	-1.13822	0.000639749	0.00519104
Tpp1	553.611	-1.13692	9.2112e-05	0.00108308
Golph3	438.821	-1.13673	4.44104e-05	0.000587439
Pnpla8	428.37	-1.13369	0.00116308	0.00829258
Arih1	236.34	-1.13153	0.00045881	0.00399731
Ccm2l	138.702	-1.12843	0.00063913	0.00518989
Rcn2	2167.49	-1.12782	6.17085e-09	3.47646e-07
Txnip	691.213	-1.12597	5.91603e-05	0.000753221
Bst2	338.451	-1.12568	8.99532e-05	0.00106427
Id2	1611.65	-1.12337	0.000474103	0.00411407
Bet1	646.763	-1.11906	0.0001343	0.0014617
Arhgap12	420.811	-1.11707	0.000365771	0.00334485
Acox1	252.222	-1.11679	4.40895e-05	0.000584616
Tmem165	533.234	-1.11632	1.30235e-05	0.000213904
Trappc6b	408.874	-1.11226	0.000194157	0.00196928
Cwf19l2	219.25	-1.11004	4.31672e-05	0.000575898
Zfp292	428.92	-1.10984	6.29723e-07	1.70323e-05
Casp6	524.899	-1.10976	7.87596e-06	0.00014178
Rab10	386.419	-1.10912	3.74011e-05	0.00051024
Cnot6	908.295	-1.10375	3.62832e-09	2.25433e-07
Pdzd8	418.142	-1.1033	0.000751399	0.00587344
Erbb2ip	421.817	-1.10312	3.18057e-06	6.70201e-05
Pnrc2	1673	-1.10114	3.05805e-05	0.000434075
Arrdc3	708.975	-1.10104	0.000335174	0.00311483
Gnpda2	513.082	-1.09786	7.7139e-06	0.000139093
Snx15	94.0314	-1.09754	0.000811019	0.00621877
Ythdf3	1055.05	-1.0965	1.08645e-07	3.75013e-06
Cxxc5	214.834	-1.09349	4.62791e-06	9.11582e-05
Pcm1	573.932	-1.09233	3.09289e-09	1.98988e-07
Tnrc6b	206.469	-1.08928	7.87515e-05	0.000951405
Ap3s1	619.885	-1.08852	0.000359809	0.00330299
Tspan3	2522.72	-1.08781	3.65412e-08	1.48251e-06
Pus10	287.632	-1.08679	9.32044e-05	0.00109204
Itsn2	379.331	-1.08444	0.000307886	0.00290171
Asah1	1053.66	-1.08036	7.03129e-07	1.86922e-05
Phf14	390.905	-1.07162	2.56165e-07	8.07328e-06
2310009A05Rik	231.99	-1.06934	0.000151245	0.00161032
Xrn1	222.358	-1.06737	0.000316145	0.00296077
Stat1	220.889	-1.06733	0.000440221	0.00386634
Zmym4	170.196	-1.06725	0.000757568	0.00590519
Paxbp1	399.525	-1.06706	0.00030399	0.00287416
Ptbp2	245.627	-1.06683	0.00109575	0.00788544
Ift74	215.495	-1.06079	0.000142955	0.00153326
Dag1	225.955	-1.0587	0.00141473	0.00966346
Zfp91	137.904	-1.05824	0.000643607	0.00521845
Vcpip1	286.249	-1.05818	0.00132787	0.00919027
Trim44	297.692	-1.05407	0.000307971	0.00290171
Hscb	207.755	-1.05192	1.06571e-05	0.000180209
2006-03-01	421.269	-1.05182	5.13205e-07	1.4345e-05
Tspan13	1299.95	-1.0515	2.5782e-06	5.67464e-05
Heph	463.971	-1.05149	0.0011044	0.00793121
Ascc3	360.058	-1.05136	0.000191158	0.00194612
Mbip	275.44	-1.05126	0.000777451	0.00602941
Atp6ap2	1020.59	-1.0499	2.95795e-07	9.13688e-06
Mphosph8	434.217	-1.04781	1.51255e-05	0.000245105
Fnbp4	391.734	-1.04651	6.36282e-07	1.7167e-05
Itfg1	847.721	-1.04488	9.64928e-06	0.000165841
Fam120a	1200.17	-1.04371	0.000184151	0.00188538
Tmco1	1117.66	-1.04165	1.39517e-06	3.3861e-05
Apoe	3266.85	-1.03835	0.000958676	0.00712974
Tm2d1	421.563	-1.0383	6.60071e-05	0.000816986
Ttc28	158.057	-1.03822	0.000649833	0.00526108
Rbm38	419.238	-1.03464	4.83317e-05	0.000629354
Atrx	1800.85	-1.03409	4.74335e-06	9.24273e-05
Atp11c	381.455	-1.03364	0.000773875	0.00601025
Capg	439.316	-1.03114	0.000475446	0.00411914
Smek2	671.042	-1.03083	0.000634033	0.00516779
Ubn2	269.271	-1.02474	0.000436988	0.003849
Polr2k	757.642	-1.02209	9.13678e-05	0.00107632
Nt5c3	531.234	-1.01889	0.000359978	0.00330299
Tmx3	788.39	-1.01713	9.2141e-05	0.00108308
Tspan6	3807.87	-1.01681	3.04892e-06	6.49174e-05
2810474O19Rik	645.88	-1.01655	3.0901e-05	0.000436346
Yipf4	534.373	-1.01341	6.0342e-05	0.000765575
Arid2	433.214	-1.00978	0.00134568	0.00928504
Kidins220	260.807	-1.00964	0.000245067	0.00240706
Senp6	390.922	-1.0093	0.000138766	0.0014998
Far1	1321.5	-1.00922	0.000429194	0.003794
Rin2	246.622	-1.00337	2.76529e-05	0.000407412
Hhex	724.63	-1.0032	6.50488e-05	0.000809059
Zmym5	326.744	-1.00097	0.000409328	0.00364805
Thoc2	1491.9	-1.00085	1.83365e-05	0.000286455
Frrs1	353.471	-0.996193	0.000598137	0.00494566
Naa16	354.346	-0.991803	0.000867182	0.00657064
Chmp1b	571.938	-0.989568	7.33114e-05	0.000894872
Sp3	491.413	-0.988416	0.00010357	0.00118914
Armc10	570.156	-0.987768	5.97762e-05	0.000759283
Cnot6l	391.309	-0.987432	7.54354e-05	0.000917459
Tmem106b	404.376	-0.987341	0.00113416	0.00811852
Acyp1	170.702	-0.986856	0.000117133	0.00131569
Cmas	254.502	-0.984006	2.56691e-05	0.000382329
Ube2w	724.141	-0.983911	4.4562e-05	0.000588727
Mpc2	388.997	-0.982397	0.00048792	0.00420991
Fam76b	235.947	-0.978155	0.000186096	0.00189993
Scoc	639.93	-0.974602	3.04986e-05	0.000433592
Nrep	3407.03	-0.973326	0.00145938	0.00990502
Rap2b	522.43	-0.972863	0.000997362	0.00732229
B230219D22Rik	763.772	-0.970935	2.84502e-05	0.000413555
Sos1	230.561	-0.969949	0.0013531	0.00931375
Setd2	431.425	-0.969043	0.000708035	0.00562546
Borcs8	212.116	-0.968361	0.000896052	0.00675643
Rbpj	142.844	-0.967015	0.00127795	0.00893158
Tnks2	1016.74	-0.966603	3.55716e-05	0.000489582
Ptpra	222.21	-0.965702	6.26569e-05	0.000787594
Ppp1r12a	273.598	-0.963563	8.47796e-05	0.00101333
Serinc1	2218.7	-0.962471	1.37471e-06	3.34389e-05
Strn3	551.095	-0.960745	0.000494278	0.00424509
Tmed7	586.884	-0.956861	0.000731607	0.00575598
Mtus1	651.04	-0.951619	0.000219506	0.00219365
Tdrd3	201.852	-0.949289	0.000124423	0.00137905
Cetn3	1707.44	-0.947504	0.000193621	0.00196568
Cnot7	972.635	-0.947054	3.06979e-05	0.000434855
Tmem55a	666.153	-0.943194	0.000131774	0.00144142
Zfand6	1640.15	-0.941099	6.26365e-05	0.000787594
Rnf115	418.998	-0.941052	7.01264e-05	0.000862539
Ube3a	546.253	-0.939536	2.40719e-05	0.000359524
Ube2e3	1891.04	-0.938341	0.000119278	0.00133289
Tug1	1188.07	-0.934141	0.00013744	0.00148991
Txndc15	392.773	-0.932231	9.83092e-05	0.00113836
Cul3	684.16	-0.930978	0.000305075	0.00287955
Lamp1	2252.3	-0.930506	1.04943e-05	0.000178011
Ccni	375.21	-0.928065	3.73671e-05	0.00051024
Tsc22d1	3556.04	-0.92784	2.69726e-06	5.88901e-05
Rock2	605.409	-0.926609	0.000509138	0.00433845
Ttc14	573.826	-0.920814	1.25731e-05	0.000208078
Ppip5k2	481.928	-0.920643	7.29546e-05	0.000892278
Wbp5	1932.42	-0.920538	2.04384e-05	0.000312116
Mettl14	184.929	-0.919463	0.000862526	0.00654449
Tm9sf3	1216.71	-0.917283	6.29219e-06	0.000116154
Taok1	793.997	-0.915619	2.24241e-06	5.04839e-05
Sh3bgrl	3723.88	-0.914169	0.000812446	0.00622531
Cd164	2985.95	-0.912235	3.75073e-09	2.31714e-07
Gcc2	415.93	-0.911926	0.00100848	0.00737403
Chuk	333.131	-0.909779	0.000127059	0.00139971
Armcx2	584.766	-0.908854	0.000111422	0.00126329
Ncor1	627.694	-0.908437	4.27602e-05	0.000572576
Hdac2	856.474	-0.907581	3.00937e-05	0.000431105
Map2k4	469.121	-0.907278	0.000166023	0.00172909
Gnl3l	454.39	-0.906842	0.000437539	0.003849
Exoc2	321.59	-0.905707	0.00143236	0.00975819
Zkscan3	388.875	-0.9056	0.000829768	0.00633191
Ythdc1	356.163	-0.904804	3.01899e-05	0.000431347
Nol7	513.214	-0.901464	0.000295209	0.00280727
Mmgt2	240.626	-0.900806	0.000121503	0.00134807
Anapc10	509.168	-0.900243	0.00108168	0.00780948
Smc5	636.5	-0.895732	0.00137264	0.00940434
Pds5b	439.032	-0.893217	0.000822802	0.00628695
Med31	227.62	-0.889806	0.000256952	0.00250794
Psme4	491.146	-0.887795	0.000125576	0.00138662
Ddx26b	386.012	-0.88574	8.62756e-05	0.00102634
Trip12	804.573	-0.885112	5.92753e-07	1.61529e-05
Ogt	978.788	-0.882697	0.00030509	0.00287955
Prpf4b	806.777	-0.882278	0.000746891	0.00584662
Zmiz1	411.769	-0.881603	0.000506739	0.00432479
Ddx3x	1817.05	-0.880659	7.07563e-05	0.000868322
Mob4	1868.69	-0.880136	1.9877e-06	4.56918e-05
Akap9	408.257	-0.879782	2.20192e-06	5.00868e-05
Chmp5	1104.67	-0.879359	0.000218888	0.00218948
Mgat2	555.221	-0.879301	0.000756164	0.0059022
Phip	752.246	-0.87761	4.0803e-06	8.2463e-05
Aasdhppt	609.307	-0.871705	0.000344516	0.00319346
Cir1	121.701	-0.870202	0.00105436	0.00764782
Ktn1	1426.93	-0.870118	6.40865e-07	1.72478e-05
Stag2	944.242	-0.869968	0.000196555	0.00198989
Swt1	359.982	-0.866766	0.000309533	0.00291137
Ugcg	391.445	-0.866581	0.00130285	0.00907151
Tram1	1556.01	-0.86451	0.000178427	0.00183889
Rnaset2b	88.2912	-0.864262	0.00143786	0.00978337
[truncated: 892 more rows]

## Sheet: Fig. 5b
Genename	s1	s2	s3	s4	s5	s6	s7	s8	s9	s10	s11	s12	s13	s14	s15	s16	s17	s18	s19	s20	s21	s22
[truncated: 36 more rows]

[truncated: 2 more sheets: Fig. 5c, Fig. 5d]
